# Supplementary material
Source: MDPI journal article supplement (https://www.mdpi.com/2073-4352/8/5/227)
Supplement: s1 [file s1]

Archive with 2 entries (2 files):
- Coordination compound CIF.cif
- Coordination compound checkcif report.pdf
