# Supplementary material
Source: MDPI journal article supplement (https://www.mdpi.com/2073-4352/8/5/227)
Supplement: s1 [file s1 › Coordination compound CIF.cif]

data_d832
_audit_creation_date               2018-04-25
_audit_creation_method
;
Olex2 1.2
(compiled 2018.04.18 svn.r3501 for OlexSys, GUI svn.r5488)
;
_shelx_SHELXL_version_number       '2014/7'
_audit_contact_author_address      ?
_audit_contact_author_email        ?
_audit_contact_author_name         ''
_audit_contact_author_phone        ?
_publ_contact_author_id_orcid      ?
_publ_section_references
;
Dolomanov, O.V., Bourhis, L.J., Gildea, R.J, Howard, J.A.K. & Puschmann, H.
 (2009), J. Appl. Cryst. 42, 339-341.

Sheldrick, G.M. (2015). Acta Cryst. C71, 3-8.
;
_chemical_name_common              ?
_chemical_name_systematic          ?
_chemical_formula_moiety           'C60 H42 Br8 Cu3 N8 Na O16, C6 H2 N3 O7'
_chemical_formula_sum              'C66 H44 Br8 Cu3 N11 Na O23'
_chemical_formula_weight           2212.01
_chemical_melting_point            ?
loop_
  _atom_type_symbol
  _atom_type_description
  _atom_type_scat_dispersion_real
  _atom_type_scat_dispersion_imag
  _atom_type_scat_source
 'C' 'C' 0.0033 0.0016 'International Tables Vol C Tables 4.2.6.8 and 6.1.1.4'
 'H' 'H' 0.0000 0.0000 'International Tables Vol C Tables 4.2.6.8 and 6.1.1.4'
 'Br' 'Br' -0.2901 2.4595
 'International Tables Vol C Tables 4.2.6.8 and 6.1.1.4'
 'Cu' 'Cu' 0.3201 1.2651 'International Tables Vol C Tables 4.2.6.8 and 6.1.1.4'
 'N' 'N' 0.0061 0.0033 'International Tables Vol C Tables 4.2.6.8 and 6.1.1.4'
 'Na' 'Na' 0.0362 0.0249 'International Tables Vol C Tables 4.2.6.8 and 6.1.1.4'
 'O' 'O' 0.0106 0.0060 'International Tables Vol C Tables 4.2.6.8 and 6.1.1.4'

_shelx_space_group_comment
;
The symmetry employed for this shelxl refinement is uniquely defined
by the following loop, which should always be used as a source of
symmetry information in preference to the above space-group names.
They are only intended as comments.
;
_space_group_crystal_system        'monoclinic'
_space_group_IT_number             14
_space_group_name_H-M_alt          'P 1 21/n 1'
_space_group_name_Hall             '-P 2yn'
loop_
  _space_group_symop_operation_xyz
 'x, y, z'
 '-x+1/2, y+1/2, -z+1/2'
 '-x, -y, -z'
 'x-1/2, -y-1/2, z-1/2'

_cell_length_a                     15.6350(14)
_cell_length_b                     18.2157(18)
_cell_length_c                     28.691(3)
_cell_angle_alpha                  90
_cell_angle_beta                   91.787(3)
_cell_angle_gamma                  90
_cell_volume                       8167.3(14)
_cell_formula_units_Z              4
_cell_measurement_reflns_used      4122
_cell_measurement_temperature      291(2)
_cell_measurement_theta_max        25.88
_cell_measurement_theta_min        2.13
_shelx_estimated_absorpt_T_max     0.449
_shelx_estimated_absorpt_T_min     0.394
_exptl_absorpt_coefficient_mu      4.771
_exptl_absorpt_correction_T_max    ?
_exptl_absorpt_correction_T_min    ?
_exptl_absorpt_correction_type     ?
_exptl_absorpt_process_details     ?
_exptl_absorpt_special_details     ?
_exptl_crystal_colour              'brown'
_exptl_crystal_density_diffrn      1.799
_exptl_crystal_density_meas        ?
_exptl_crystal_density_method      ?
_exptl_crystal_description         block
_exptl_crystal_F_000               4316
_exptl_crystal_size_max            0.24
_exptl_crystal_size_mid            0.22
_exptl_crystal_size_min            0.2
_exptl_transmission_factor_max     ?
_exptl_transmission_factor_min     ?
_diffrn_reflns_av_R_equivalents    0.0257
_diffrn_reflns_av_unetI/netI       0.0687
_diffrn_reflns_Laue_measured_fraction_full  0.975
_diffrn_reflns_Laue_measured_fraction_max  0.962
_diffrn_reflns_limit_h_max         20
_diffrn_reflns_limit_h_min         -20
_diffrn_reflns_limit_k_max         16
_diffrn_reflns_limit_k_min         -23
_diffrn_reflns_limit_l_max         37
_diffrn_reflns_limit_l_min         -36
_diffrn_reflns_number              46887
_diffrn_reflns_point_group_measured_fraction_full  0.975
_diffrn_reflns_point_group_measured_fraction_max  0.962
_diffrn_reflns_theta_full          25.242
_diffrn_reflns_theta_max           27.552
_diffrn_reflns_theta_min           2.236
_diffrn_ambient_temperature        291.15
_diffrn_detector_area_resol_mean   ?
_diffrn_measured_fraction_theta_full  0.975
_diffrn_measured_fraction_theta_max  0.962
_diffrn_measurement_device_type    'CCD area detector'
_diffrn_measurement_method         ?
_diffrn_radiation_type             MoK\a
_diffrn_radiation_wavelength       0.71073
_diffrn_source                     ?
_reflns_Friedel_coverage           0.000
_reflns_Friedel_fraction_full      .
_reflns_Friedel_fraction_max       .
_reflns_number_gt                  12034
_reflns_number_total               18150
_reflns_special_details
;
 Reflections were merged by SHELXL according to the crystal
 class for the calculation of statistics and refinement.
 
 Structure factors included contributions from the .fab file.
 
 _reflns_Friedel_fraction is defined as the number of unique
 Friedel pairs measured divided by the number that would be
 possible theoretically, ignoring centric projections and
 systematic absences.
;
_reflns_threshold_expression       'I > 2\s(I)'
_computing_cell_refinement         ?
_computing_data_collection         ?
_computing_data_reduction          ?
_computing_molecular_graphics      'Olex2 (Dolomanov et al., 2009)'
_computing_publication_material    'Olex2 (Dolomanov et al., 2009)'
_computing_structure_refinement    'ShelXL (Sheldrick, 2015)'
_computing_structure_solution      ?
_refine_diff_density_max           1.434
_refine_diff_density_min           -0.846
_refine_diff_density_rms           0.095
_refine_ls_extinction_coef         .
_refine_ls_extinction_method       none
_refine_ls_goodness_of_fit_ref     1.032
_refine_ls_hydrogen_treatment      constr
_refine_ls_matrix_type             full
_refine_ls_number_parameters       1009
_refine_ls_number_reflns           18150
_refine_ls_number_restraints       7
_refine_ls_R_factor_all            0.0947
_refine_ls_R_factor_gt             0.0568
_refine_ls_restrained_S_all        1.033
_refine_ls_shift/su_max            0.001
_refine_ls_shift/su_mean           0.000
_refine_ls_structure_factor_coef   Fsqd
_refine_ls_weighting_details      
 'w=1/[\s^2^(Fo^2^)+(0.0641P)^2^+7.0985P] where P=(Fo^2^+2Fc^2^)/3'
_refine_ls_weighting_scheme        calc
_refine_ls_wR_factor_gt            0.1225
_refine_ls_wR_factor_ref           0.1310
_refine_special_details            ?
_olex2_refinement_description
;
1. Fixed Uiso
 At 1.2 times of:
  All C(H) groups, All C(H,H) groups
 At 1.5 times of:
  All O(H) groups
2. Rigid bond restraints
 O21, N9, O22, N9, N5, C37
 with sigma for 1-2 distances of 0.002 and sigma for 1-3 distances of 0.002
 O7, N4, C18, C21, C31, C32
 with sigma for 1-2 distances of 0.002 and sigma for 1-3 distances of 0.002
3.a Riding coordinates:
 O1(H1), O9(H9)
3.b Secondary CH2 refined with riding coordinates:
 C8(H8A,H8B), C9(H9A,H9B), C22(H22A,H22B), C23(H23A,H23B), C38(H38A,H38B),
 C39(H39A,H39B), C52(H52A,H52B), C53(H53A,H53B)
3.c Aromatic/amide H refined with riding coordinates:
 C2(H2), C6(H6), C7(H7), C10(H10), C13(H13), C14(H14), C15(H15), C16(H16),
 C21(H21), C24(H24), C28(H28), C30(H30), C33(H33), C35(H35), C37(H37), C40(H40),
  C43(H43), C44(H44), C45(H45), C46(H46), C51(H51), C54(H54), C58(H58),
 C60(H60), C62(H62), C64(H64)
;
_atom_sites_solution_hydrogens     mixed
_atom_sites_solution_primary       ?
_atom_sites_solution_secondary     ?
loop_
  _atom_site_label
  _atom_site_type_symbol
  _atom_site_fract_x
  _atom_site_fract_y
  _atom_site_fract_z
  _atom_site_U_iso_or_equiv
  _atom_site_adp_type
  _atom_site_occupancy
  _atom_site_site_symmetry_order
  _atom_site_calc_flag
  _atom_site_refinement_flags_posn
  _atom_site_refinement_flags_adp
  _atom_site_refinement_flags_occupancy
  _atom_site_disorder_assembly
  _atom_site_disorder_group
 Br1 Br -0.07524(4) 0.31599(4) 0.85876(2) 0.05992(18) Uani 1 1 d . . . . .
 Br2 Br 0.18820(4) 0.30576(4) 0.99786(2) 0.05490(16) Uani 1 1 d . . . . .
 Br3 Br -0.30749(4) -0.09548(4) 0.74030(2) 0.05374(16) Uani 1 1 d . . . . .
 Br4 Br 0.04093(3) -0.01928(3) 0.75625(2) 0.04374(14) Uani 1 1 d . . . . .
 Br5 Br 0.00731(3) 0.29856(3) 0.69068(2) 0.04298(14) Uani 1 1 d . . . . .
 Br6 Br -0.34312(3) 0.29572(3) 0.63847(2) 0.05055(15) Uani 1 1 d . . . . .
 Br7 Br -0.03321(4) -0.05186(4) 0.58143(2) 0.06052(18) Uani 1 1 d . . . . .
 Br8 Br 0.26161(4) 0.01714(4) 0.48299(2) 0.06438(19) Uani 1 1 d . . . . .
 C1 C 0.0415(3) 0.3150(3) 0.8755(2) 0.0521(15) Uani 1 1 d . . . . .
 C2 C 0.0667(3) 0.3134(3) 0.92266(18) 0.0480(14) Uani 1 1 d . . . . .
 H2 H 0.0262 0.3159 0.9457 0.058 Uiso 1 1 calc R . . . .
 C3 C 0.1522(4) 0.3081(3) 0.93449(19) 0.0483(14) Uani 1 1 d . . . . .
 C4 C 0.2151(3) 0.3035(3) 0.90138(17) 0.0370(12) Uani 1 1 d . . . . .
 C5 C 0.1865(3) 0.3056(3) 0.85410(18) 0.0400(12) Uani 1 1 d . . . . .
 C6 C 0.1038(3) 0.3094(3) 0.84114(19) 0.0453(13) Uani 1 1 d . . . . .
 H6 H 0.0874 0.3083 0.8097 0.054 Uiso 1 1 calc R . . . .
 C7 C 0.2497(3) 0.3021(3) 0.81645(18) 0.0416(12) Uani 1 1 d . . . . .
 H7 H 0.2301 0.3050 0.7856 0.050 Uiso 1 1 calc R . . . .
 C8 C 0.4662(3) 0.2854(4) 0.7965(2) 0.0543(16) Uani 1 1 d . . . . .
 H8A H 0.4848 0.3308 0.8113 0.065 Uiso 1 1 calc R . . . .
 H8B H 0.4781 0.2452 0.8179 0.065 Uiso 1 1 calc R . . . .
 C9 C 0.5113(3) 0.2742(3) 0.7535(2) 0.0476(14) Uani 1 1 d . . . . .
 H9A H 0.5714 0.2853 0.7594 0.057 Uiso 1 1 calc R . . . .
 H9B H 0.4895 0.3091 0.7305 0.057 Uiso 1 1 calc R . . . .
 C10 C 0.4156(3) 0.2045(3) 0.67021(16) 0.0342(11) Uani 1 1 d . . . . .
 H10 H 0.4650 0.2234 0.6575 0.041 Uiso 1 1 calc R . . . .
 C11 C 0.3432(3) 0.1977(3) 0.64031(16) 0.0339(11) Uani 1 1 d . . . . .
 C12 C 0.3502(3) 0.2159(3) 0.59025(18) 0.0419(12) Uani 1 1 d . . . . .
 C13 C 0.4285(3) 0.2342(3) 0.57030(19) 0.0447(13) Uani 1 1 d . . . . .
 H13 H 0.4776 0.2354 0.5894 0.054 Uiso 1 1 calc R . . . .
 C14 C 0.4353(4) 0.2501(3) 0.52413(19) 0.0518(15) Uani 1 1 d . . . . .
 H14 H 0.4873 0.2649 0.5124 0.062 Uiso 1 1 calc R . . . .
 C15 C 0.3634(4) 0.2439(3) 0.49516(19) 0.0496(14) Uani 1 1 d . . . . .
 H15 H 0.3673 0.2530 0.4634 0.060 Uiso 1 1 calc R . . . .
 C16 C 0.2868(3) 0.2244(3) 0.51295(19) 0.0492(15) Uani 1 1 d . . . . .
 H16 H 0.2392 0.2207 0.4929 0.059 Uiso 1 1 calc R . . . .
 C17 C 0.2773(3) 0.2096(3) 0.56072(18) 0.0406(12) Uani 1 1 d . . . . .
 C18 C 0.1964(3) 0.1881(3) 0.57914(17) 0.0378(11) Uani 1 1 d . U . . .
 C19 C 0.1894(3) 0.1749(3) 0.62601(18) 0.0399(12) Uani 1 1 d . . . . .
 C20 C 0.2645(3) 0.1803(3) 0.65791(17) 0.0371(12) Uani 1 1 d . . . . .
 C21 C 0.1238(3) 0.1803(3) 0.54862(18) 0.0420(12) Uani 1 1 d . U . . .
 H21 H 0.1318 0.1883 0.5170 0.050 Uiso 1 1 calc R . . . .
 C22 C -0.0611(4) 0.2163(4) 0.5156(2) 0.0564(16) Uani 1 1 d . . . . .
 H22A H -0.1034 0.2066 0.4909 0.068 Uiso 1 1 calc R . . . .
 H22B H -0.0251 0.2561 0.5052 0.068 Uiso 1 1 calc R . . . .
 C23 C -0.1074(4) 0.2419(3) 0.55840(19) 0.0490(14) Uani 1 1 d . . . . .
 H23A H -0.0660 0.2560 0.5827 0.059 Uiso 1 1 calc R . . . .
 H23B H -0.1424 0.2843 0.5506 0.059 Uiso 1 1 calc R . . . .
 C24 C -0.1730(3) 0.0960(3) 0.62834(17) 0.0361(11) Uani 1 1 d . . . . .
 H24 H -0.2289 0.0977 0.6163 0.043 Uiso 1 1 calc R . . . .
 C25 C -0.1561(3) 0.0465(3) 0.66629(17) 0.0358(11) Uani 1 1 d . . . . .
 C26 C -0.0736(3) 0.0420(3) 0.68892(17) 0.0363(11) Uani 1 1 d . . . . .
 C27 C -0.0669(3) -0.0090(3) 0.72580(17) 0.0343(11) Uani 1 1 d . . . . .
 C28 C -0.1366(3) -0.0477(3) 0.74113(18) 0.0381(12) Uani 1 1 d . . . . .
 H28 H -0.1310 -0.0793 0.7665 0.046 Uiso 1 1 calc R . . . .
 C29 C -0.2149(3) -0.0386(3) 0.71795(18) 0.0426(13) Uani 1 1 d . . . . .
 C30 C -0.2241(3) 0.0051(3) 0.68094(18) 0.0378(12) Uani 1 1 d . . . . .
 H30 H -0.2766 0.0077 0.6649 0.045 Uiso 1 1 calc R . . . .
 C31 C 0.2590(4) -0.0021(3) 0.5811(2) 0.0573(15) Uani 1 1 d . U . . .
 C32 C 0.2087(4) -0.0051(3) 0.53909(18) 0.0458(13) Uani 1 1 d . U . . .
 C33 C 0.1233(4) -0.0214(4) 0.5395(2) 0.0555(16) Uani 1 1 d . . . . .
 H33 H 0.0925 -0.0257 0.5114 0.067 Uiso 1 1 calc R . . . .
 C34 C 0.0818(4) -0.0315(3) 0.5809(2) 0.0535(15) Uani 1 1 d . . . . .
 C35 C 0.1330(4) -0.0282(3) 0.62409(19) 0.0484(14) Uani 1 1 d . . . . .
 H35 H 0.1071 -0.0365 0.6524 0.058 Uiso 1 1 calc R . . . .
 C36 C 0.2193(4) -0.0131(3) 0.6236(2) 0.0515(15) Uani 1 1 d . . . . .
 C37 C 0.2604(4) -0.0084(3) 0.6690(2) 0.0543(15) Uani 1 1 d . U . . .
 H37 H 0.2293 -0.0142 0.6959 0.065 Uiso 1 1 calc R . . . .
 C38 C 0.4596(4) -0.0006(4) 0.7265(2) 0.0571(16) Uani 1 1 d . . . . .
 H38A H 0.4911 0.0365 0.7099 0.069 Uiso 1 1 calc R . . . .
 H38B H 0.4764 -0.0483 0.7149 0.069 Uiso 1 1 calc R . . . .
 C39 C 0.4816(4) 0.0041(4) 0.7766(2) 0.0614(17) Uani 1 1 d . . . . .
 H39A H 0.4424 -0.0270 0.7932 0.074 Uiso 1 1 calc R . . . .
 H39B H 0.5386 -0.0158 0.7818 0.074 Uiso 1 1 calc R . . . .
 C40 C 0.3694(3) 0.0901(3) 0.84385(18) 0.0402(12) Uani 1 1 d . . . . .
 H40 H 0.4097 0.0707 0.8650 0.048 Uiso 1 1 calc R . . . .
 C41 C 0.2871(3) 0.1045(3) 0.86069(17) 0.0383(12) Uani 1 1 d . . . . .
 C42 C 0.2717(4) 0.1000(3) 0.91081(19) 0.0482(14) Uani 1 1 d . . . . .
 C43 C 0.3423(3) 0.0942(3) 0.94193(18) 0.0453(13) Uani 1 1 d . . . . .
 H43 H 0.3976 0.0929 0.9309 0.054 Uiso 1 1 calc R . . . .
 C44 C 0.3281(4) 0.0901(3) 0.99162(19) 0.0526(15) Uani 1 1 d . . . . .
 H44 H 0.3742 0.0861 1.0128 0.063 Uiso 1 1 calc R . . . .
 C45 C 0.2473(4) 0.0923(3) 1.0068(2) 0.0526(15) Uani 1 1 d . . . . .
 H45 H 0.2384 0.0905 1.0387 0.063 Uiso 1 1 calc R . . . .
 C46 C 0.1780(4) 0.0972(3) 0.97661(17) 0.0476(14) Uani 1 1 d . . . . .
 H46 H 0.1232 0.0965 0.9884 0.057 Uiso 1 1 calc R . . . .
 C47 C 0.1880(3) 0.1032(3) 0.92765(19) 0.0477(14) Uani 1 1 d . . . . .
 C48 C 0.1168(3) 0.1150(3) 0.89392(18) 0.0443(13) Uani 1 1 d . . . . .
 C49 C 0.1323(3) 0.1230(3) 0.84695(17) 0.0378(12) Uani 1 1 d . . . . .
 C50 C 0.2177(3) 0.1225(3) 0.82963(18) 0.0425(13) Uani 1 1 d . . . . .
 C51 C 0.0288(3) 0.1132(3) 0.91020(19) 0.0389(12) Uani 1 1 d . . . . .
 H51 H 0.0207 0.1060 0.9418 0.047 Uiso 1 1 calc R . . . .
 C52 C -0.1457(3) 0.0479(3) 0.91308(18) 0.0436(13) Uani 1 1 d . . . . .
 H52A H -0.1996 0.0491 0.9289 0.052 Uiso 1 1 calc R . . . .
 H52B H -0.1055 0.0189 0.9318 0.052 Uiso 1 1 calc R . . . .
 C53 C -0.1594(3) 0.0116(3) 0.86447(19) 0.0481(14) Uani 1 1 d . . . . .
 H53A H -0.1042 0.0055 0.8505 0.058 Uiso 1 1 calc R . . . .
 H53B H -0.1835 -0.0369 0.8687 0.058 Uiso 1 1 calc R . . . .
 C54 C -0.2214(3) 0.1307(3) 0.77431(17) 0.0406(12) Uani 1 1 d . . . . .
 H54 H -0.2770 0.1125 0.7730 0.049 Uiso 1 1 calc R . . . .
 C55 C -0.1990(3) 0.1855(3) 0.74009(18) 0.0396(12) Uani 1 1 d . . . . .
 C56 C -0.1152(3) 0.2080(3) 0.73388(17) 0.0380(12) Uani 1 1 d . . . . .
 C57 C -0.1042(3) 0.2619(3) 0.69958(17) 0.0350(11) Uani 1 1 d . . . . .
 C58 C -0.1690(3) 0.2864(3) 0.67031(18) 0.0416(12) Uani 1 1 d . . . . .
 H58 H -0.1582 0.3200 0.6468 0.050 Uiso 1 1 calc R . . . .
 C59 C -0.2533(3) 0.2593(3) 0.67652(17) 0.0387(12) Uani 1 1 d . . . . .
 C60 C -0.2664(3) 0.2078(3) 0.71164(18) 0.0412(13) Uani 1 1 d . . . . .
 H60 H -0.3208 0.1886 0.7158 0.049 Uiso 1 1 calc R . . . .
 C61 C 0.2875(3) 0.9023(3) 0.94158(18) 0.0448(13) Uani 1 1 d . . . . .
 C62 C 0.2044(3) 0.9106(3) 0.9528(2) 0.0471(13) Uani 1 1 d . . . . .
 H62 H 0.1900 0.9137 0.9840 0.056 Uiso 1 1 calc R . . . .
 C63 C 0.1433(3) 0.9142(3) 0.91940(18) 0.0403(12) Uani 1 1 d . . . . .
 C64 C 0.1605(3) 0.9118(3) 0.87331(18) 0.0422(13) Uani 1 1 d . . . . .
 H64 H 0.1167 0.9153 0.8507 0.051 Uiso 1 1 calc R . . . .
 C65 C 0.2459(3) 0.9039(3) 0.86064(17) 0.0361(11) Uani 1 1 d . . . . .
 C66 C 0.3145(3) 0.9043(3) 0.89227(18) 0.0426(13) Uani 1 1 d . . . . .
 Cu1 Cu 0.00749(3) 0.13599(4) 0.62132(2) 0.03630(15) Uani 1 1 d . . . . .
 Cu2 Cu 0.32870(3) 0.14525(4) 0.75106(2) 0.03671(15) Uani 1 1 d . . . . .
 Cu3 Cu -0.04819(3) 0.13742(4) 0.81795(2) 0.03687(15) Uani 1 1 d . . . . .
 N1 N 0.3289(3) 0.2952(3) 0.82505(17) 0.0514(12) Uani 1 1 d . . . . .
 N2 N 0.4197(2) 0.1869(2) 0.71359(15) 0.0384(10) Uani 1 1 d . . . . .
 N3 N 0.0471(3) 0.1628(2) 0.56095(14) 0.0372(10) Uani 1 1 d . . . . .
 N4 N -0.1175(3) 0.1389(3) 0.60906(15) 0.0423(10) Uani 1 1 d . U . . .
 N5 N 0.3417(3) 0.0040(3) 0.67151(17) 0.0558(12) Uani 1 1 d . U . . .
 N6 N 0.3945(2) 0.1015(2) 0.80095(14) 0.0370(10) Uani 1 1 d . . . . .
 N7 N -0.0349(3) 0.1207(2) 0.88440(15) 0.0402(10) Uani 1 1 d . . . . .
 N8 N -0.1690(2) 0.1048(2) 0.80713(14) 0.0360(10) Uani 1 1 d . . . . .
 N9 N 0.2599(3) 0.8982(3) 0.81071(15) 0.0459(11) Uani 1 1 d . U . . .
 N10 N 0.0515(3) 0.9210(3) 0.93173(17) 0.0502(12) Uani 1 1 d . . . . .
 N11 N 0.3500(3) 0.8918(3) 0.97867(16) 0.0466(11) Uani 1 1 d . . . . .
 Na1 Na 0.10305(11) 0.14673(12) 0.73072(7) 0.0414(5) Uani 1 1 d . . . . .
 O1 O 0.2968(2) 0.2984(2) 0.91486(13) 0.0503(10) Uani 1 1 d . . . . .
 H1 H 0.3312 0.3009 0.8878 0.075 Uiso 1 1 d R . . . .
 O2 O 0.3739(2) 0.2887(2) 0.78458(13) 0.0534(10) Uani 1 1 d . . . . .
 O3 O 0.5046(2) 0.2006(2) 0.73362(12) 0.0451(9) Uani 1 1 d . . . . .
 O4 O 0.25024(19) 0.1657(2) 0.70119(11) 0.0411(9) Uani 1 1 d . . . . .
 O5 O 0.11765(19) 0.1561(2) 0.64706(11) 0.0389(8) Uani 1 1 d . . . . .
 O6 O -0.0099(2) 0.1531(2) 0.52185(13) 0.0544(10) Uani 1 1 d . . . . .
 O7 O -0.1615(2) 0.1823(2) 0.57525(13) 0.0502(10) Uani 1 1 d . U . . .
 O8 O -0.0081(2) 0.0809(2) 0.67667(12) 0.0407(8) Uani 1 1 d . . . . .
 O9 O 0.3423(2) 0.0142(2) 0.58004(14) 0.0601(11) Uani 1 1 d . . . . .
 H9 H 0.3627 0.0132 0.6067 0.090 Uiso 1 1 d R . . . .
 O10 O 0.3701(3) 0.0097(2) 0.71786(14) 0.0587(11) Uani 1 1 d . . . . .
 O11 O 0.4794(2) 0.0747(2) 0.79632(12) 0.0448(9) Uani 1 1 d . . . . .
 O12 O -0.1136(2) 0.1210(2) 0.90885(11) 0.0412(9) Uani 1 1 d . . . . .
 O13 O -0.2139(2) 0.0516(2) 0.83305(13) 0.0493(9) Uani 1 1 d . . . . .
 O14 O 0.22738(19) 0.1330(2) 0.78571(12) 0.0414(9) Uani 1 1 d . . . . .
 O15 O 0.07236(19) 0.1384(2) 0.81414(11) 0.0390(8) Uani 1 1 d . . . . .
 O16 O -0.04905(18) 0.18611(19) 0.75935(11) 0.0348(8) Uani 1 1 d . . . . .
 O17 O -0.0035(2) 0.9127(2) 0.90081(14) 0.0505(10) Uani 1 1 d . . . . .
 O18 O 0.0366(2) 0.9303(2) 0.97230(13) 0.0511(10) Uani 1 1 d . . . . .
 O19 O 0.3262(2) 0.8950(2) 1.01890(13) 0.0513(10) Uani 1 1 d . . . . .
 O20 O 0.4204(2) 0.8765(3) 0.97190(14) 0.0612(12) Uani 1 1 d . . . . .
 O21 O 0.3291(3) 0.9114(4) 0.79993(18) 0.100(2) Uani 1 1 d . U . . .
 O22 O 0.2070(3) 0.8806(3) 0.78958(16) 0.0772(14) Uani 1 1 d . U . . .
 O23 O 0.3918(2) 0.9093(2) 0.88081(12) 0.0468(9) Uani 1 1 d . . . . .

loop_
  _atom_site_aniso_label
  _atom_site_aniso_U_11
  _atom_site_aniso_U_22
  _atom_site_aniso_U_33
  _atom_site_aniso_U_23
  _atom_site_aniso_U_13
  _atom_site_aniso_U_12
 Br1 0.0519(3) 0.0687(5) 0.0582(4) 0.0130(3) -0.0137(3) 0.0111(3)
 Br2 0.0600(3) 0.0640(4) 0.0400(3) -0.0068(3) -0.0091(2) 0.0036(3)
 Br3 0.0535(3) 0.0542(4) 0.0540(4) 0.0182(3) 0.0087(2) -0.0179(3)
 Br4 0.0481(3) 0.0441(3) 0.0381(3) 0.0138(2) -0.0143(2) -0.0056(2)
 Br5 0.0416(3) 0.0418(3) 0.0458(3) 0.0131(2) 0.0054(2) -0.0055(2)
 Br6 0.0493(3) 0.0546(4) 0.0465(3) 0.0156(3) -0.0182(2) 0.0032(3)
 Br7 0.0631(3) 0.0681(5) 0.0494(4) -0.0184(3) -0.0141(3) 0.0142(3)
 Br8 0.0701(4) 0.0652(5) 0.0586(4) 0.0064(3) 0.0146(3) -0.0113(3)
 C1 0.047(3) 0.050(4) 0.059(4) 0.012(3) -0.011(3) 0.005(3)
 C2 0.052(3) 0.056(4) 0.037(3) 0.005(3) 0.008(2) 0.004(3)
 C3 0.059(3) 0.044(4) 0.041(3) 0.002(3) -0.009(2) 0.011(3)
 C4 0.040(2) 0.037(3) 0.033(3) -0.009(2) -0.014(2) 0.015(2)
 C5 0.044(3) 0.039(3) 0.036(3) 0.001(2) -0.013(2) -0.014(2)
 C6 0.051(3) 0.044(4) 0.040(3) 0.002(3) -0.007(2) 0.008(2)
 C7 0.054(3) 0.035(3) 0.035(3) -0.012(2) -0.004(2) 0.000(2)
 C8 0.049(3) 0.068(5) 0.045(3) -0.013(3) -0.001(2) -0.014(3)
 C9 0.050(3) 0.032(3) 0.061(4) 0.012(3) 0.006(3) -0.012(2)
 C10 0.037(2) 0.036(3) 0.030(3) 0.006(2) 0.0052(19) -0.001(2)
 C11 0.033(2) 0.042(3) 0.027(3) 0.013(2) -0.0018(18) -0.006(2)
 C12 0.053(3) 0.034(3) 0.039(3) 0.009(2) 0.006(2) 0.003(2)
 C13 0.049(3) 0.039(3) 0.047(3) 0.004(3) 0.015(2) -0.002(2)
 C14 0.072(4) 0.044(4) 0.041(3) -0.004(3) 0.026(3) -0.015(3)
 C15 0.070(4) 0.049(4) 0.031(3) 0.017(3) 0.017(3) 0.002(3)
 C16 0.055(3) 0.055(4) 0.038(3) 0.020(3) 0.010(2) 0.017(3)
 C17 0.046(3) 0.041(3) 0.035(3) -0.005(2) 0.010(2) -0.003(2)
 C18 0.050(3) 0.032(3) 0.032(3) 0.009(2) 0.0001(18) 0.001(2)
 C19 0.042(3) 0.039(3) 0.040(3) -0.002(2) 0.005(2) -0.003(2)
 C20 0.037(2) 0.038(3) 0.036(3) 0.014(2) 0.004(2) -0.004(2)
 C21 0.052(3) 0.041(3) 0.033(3) -0.004(2) 0.0044(19) -0.004(2)
 C22 0.070(4) 0.055(4) 0.043(3) 0.017(3) -0.014(3) -0.007(3)
 C23 0.065(3) 0.039(3) 0.042(3) 0.009(3) -0.010(3) 0.010(3)
 C24 0.046(3) 0.025(3) 0.037(3) 0.007(2) -0.012(2) -0.008(2)
 C25 0.034(2) 0.035(3) 0.038(3) 0.009(2) 0.005(2) 0.005(2)
 C26 0.042(3) 0.031(3) 0.035(3) -0.010(2) -0.006(2) -0.003(2)
 C27 0.035(2) 0.028(3) 0.040(3) 0.004(2) -0.005(2) -0.002(2)
 C28 0.053(3) 0.022(3) 0.039(3) -0.007(2) 0.000(2) -0.005(2)
 C29 0.038(2) 0.046(4) 0.044(3) 0.008(3) 0.006(2) -0.007(2)
 C30 0.041(3) 0.031(3) 0.041(3) 0.003(2) -0.002(2) -0.001(2)
 C31 0.068(4) 0.046(4) 0.058(4) -0.004(3) -0.001(2) 0.018(3)
 C32 0.070(3) 0.033(3) 0.036(3) -0.015(2) 0.014(2) 0.009(3)
 C33 0.063(4) 0.066(4) 0.037(3) -0.030(3) -0.006(3) 0.013(3)
 C34 0.085(4) 0.037(4) 0.038(3) -0.003(3) -0.001(3) 0.015(3)
 C35 0.076(4) 0.032(3) 0.037(3) -0.013(2) -0.003(3) 0.007(3)
 C36 0.061(3) 0.044(4) 0.050(4) -0.015(3) 0.001(3) -0.010(3)
 C37 0.067(2) 0.050(4) 0.045(3) -0.028(3) -0.007(3) 0.016(3)
 C38 0.062(4) 0.057(4) 0.051(4) -0.018(3) -0.003(3) 0.021(3)
 C39 0.067(4) 0.057(4) 0.061(4) -0.010(3) 0.017(3) 0.017(3)
 C40 0.047(3) 0.034(3) 0.039(3) 0.003(2) -0.012(2) -0.002(2)
 C41 0.047(3) 0.036(3) 0.031(3) 0.007(2) -0.004(2) -0.005(2)
 C42 0.061(3) 0.041(3) 0.042(3) -0.007(3) -0.012(3) -0.003(3)
 C43 0.047(3) 0.054(4) 0.034(3) 0.006(3) -0.017(2) -0.003(3)
 C44 0.063(3) 0.060(4) 0.034(3) 0.002(3) -0.009(2) -0.008(3)
 C45 0.066(4) 0.055(4) 0.036(3) 0.029(3) -0.014(3) -0.008(3)
 C46 0.062(3) 0.053(4) 0.027(3) 0.007(3) -0.012(2) -0.016(3)
 C47 0.055(3) 0.049(4) 0.038(3) 0.011(3) -0.006(2) -0.011(3)
 C48 0.055(3) 0.044(4) 0.034(3) 0.000(2) -0.002(2) -0.009(3)
 C49 0.038(2) 0.042(3) 0.034(3) 0.000(2) 0.001(2) -0.005(2)
 C50 0.045(3) 0.046(4) 0.037(3) 0.013(3) 0.000(2) -0.010(2)
 C51 0.050(3) 0.026(3) 0.041(3) 0.003(2) 0.006(2) 0.005(2)
 C52 0.044(3) 0.045(4) 0.042(3) 0.014(3) 0.018(2) 0.003(2)
 C53 0.038(3) 0.056(4) 0.051(3) 0.007(3) 0.014(2) -0.012(3)
 C54 0.038(2) 0.049(4) 0.035(3) -0.013(3) 0.004(2) -0.001(2)
 C55 0.042(3) 0.040(3) 0.035(3) -0.004(2) -0.006(2) -0.004(2)
 C56 0.041(2) 0.043(3) 0.030(3) -0.008(2) -0.003(2) -0.005(2)
 C57 0.037(2) 0.032(3) 0.036(3) 0.005(2) 0.003(2) -0.003(2)
 C58 0.048(3) 0.038(3) 0.038(3) 0.001(2) -0.011(2) -0.002(2)
 C59 0.039(2) 0.046(3) 0.030(3) 0.003(2) -0.015(2) 0.004(2)
 C60 0.025(2) 0.058(4) 0.040(3) -0.002(3) -0.0069(19) 0.003(2)
 C61 0.059(3) 0.042(3) 0.033(3) 0.009(2) -0.003(2) 0.014(3)
 C62 0.057(3) 0.041(4) 0.043(3) 0.011(3) -0.003(2) 0.001(3)
 C63 0.039(2) 0.043(3) 0.040(3) -0.001(2) 0.010(2) -0.011(2)
 C64 0.042(3) 0.046(4) 0.037(3) -0.009(2) -0.007(2) 0.005(2)
 C65 0.039(2) 0.036(3) 0.032(3) -0.010(2) -0.0038(19) 0.006(2)
 C66 0.040(3) 0.047(4) 0.041(3) -0.009(3) -0.003(2) -0.005(2)
 Cu1 0.0375(3) 0.0358(4) 0.0352(3) 0.0059(3) -0.0059(2) 0.0031(3)
 Cu2 0.0326(3) 0.0392(4) 0.0379(3) 0.0065(3) -0.0051(2) 0.0023(3)
 Cu3 0.0363(3) 0.0376(4) 0.0368(3) 0.0055(3) 0.0042(2) 0.0024(3)
 N1 0.056(3) 0.046(3) 0.052(3) -0.017(2) 0.002(2) -0.010(2)
 N2 0.0305(19) 0.043(3) 0.041(3) 0.001(2) -0.0070(17) -0.0020(17)
 N3 0.047(2) 0.037(3) 0.027(2) 0.0016(19) -0.0075(17) 0.0035(19)
 N4 0.047(2) 0.044(3) 0.035(2) 0.0061(19) -0.0130(17) 0.002(2)
 N5 0.071(2) 0.052(3) 0.043(3) -0.014(2) -0.005(2) 0.013(2)
 N6 0.044(2) 0.039(3) 0.027(2) 0.0072(19) -0.0109(17) 0.0070(19)
 N7 0.042(2) 0.040(3) 0.039(3) 0.006(2) 0.0066(19) 0.0011(19)
 N8 0.037(2) 0.040(3) 0.032(2) 0.0101(19) 0.0099(17) -0.0070(18)
 N9 0.054(2) 0.055(3) 0.028(2) -0.007(2) -0.0077(16) 0.016(2)
 N10 0.046(2) 0.059(3) 0.047(3) -0.003(2) 0.014(2) 0.006(2)
 N11 0.049(3) 0.049(3) 0.041(3) -0.007(2) -0.015(2) 0.018(2)
 Na1 0.0404(10) 0.0493(14) 0.0346(11) 0.0062(10) 0.0011(8) -0.0059(9)
 O1 0.049(2) 0.060(3) 0.040(2) 0.0020(19) -0.0128(16) -0.0123(18)
 O2 0.055(2) 0.066(3) 0.040(2) 0.005(2) 0.0079(17) 0.006(2)
 O3 0.0394(17) 0.058(3) 0.038(2) -0.0078(18) -0.0114(14) -0.0057(17)
 O4 0.0334(16) 0.057(3) 0.032(2) 0.0119(17) -0.0076(13) 0.0040(16)
 O5 0.0356(16) 0.050(2) 0.0304(19) 0.0029(16) -0.0069(13) -0.0032(15)
 O6 0.053(2) 0.069(3) 0.040(2) -0.007(2) -0.0133(17) 0.002(2)
 O7 0.0461(19) 0.058(3) 0.046(2) 0.0255(19) -0.0073(16) 0.0080(18)
 O8 0.0463(19) 0.039(2) 0.036(2) 0.0034(16) -0.0068(15) -0.0036(16)
 O9 0.063(2) 0.066(3) 0.052(3) -0.008(2) -0.0024(19) -0.015(2)
 O10 0.070(3) 0.055(3) 0.050(3) -0.022(2) -0.0128(19) -0.001(2)
 O11 0.0398(18) 0.058(3) 0.036(2) -0.0042(18) -0.0102(14) 0.0045(17)
 O12 0.0455(18) 0.048(2) 0.0308(19) 0.0074(17) 0.0159(14) 0.0072(16)
 O13 0.051(2) 0.051(3) 0.047(2) 0.0098(19) 0.0078(17) -0.0115(18)
 O14 0.0364(17) 0.051(2) 0.037(2) 0.0072(17) -0.0030(14) -0.0045(16)
 O15 0.0343(16) 0.049(2) 0.0340(19) -0.0067(17) 0.0018(14) -0.0057(15)
 O16 0.0337(16) 0.036(2) 0.0342(18) 0.0055(15) 0.0000(13) -0.0069(14)
 O17 0.046(2) 0.049(3) 0.057(3) 0.005(2) 0.0099(18) 0.0127(18)
 O18 0.051(2) 0.053(3) 0.050(2) -0.016(2) 0.0191(17) 0.0103(18)
 O19 0.059(2) 0.059(3) 0.034(2) 0.0042(19) -0.0189(17) 0.0120(19)
 O20 0.050(2) 0.080(3) 0.053(3) 0.017(2) -0.0036(18) 0.024(2)
 O21 0.052(2) 0.168(6) 0.079(4) 0.025(4) -0.012(2) 0.012(3)
 O22 0.059(2) 0.115(4) 0.057(3) -0.003(3) -0.0095(19) 0.000(2)
 O23 0.0393(18) 0.055(3) 0.046(2) -0.0138(19) -0.0061(15) 0.0112(17)

_geom_special_details
;
 All esds (except the esd in the dihedral angle between two l.s. planes)
 are estimated using the full covariance matrix.  The cell esds are taken
 into account individually in the estimation of esds in distances, angles
 and torsion angles; correlations between esds in cell parameters are only
 used when they are defined by crystal symmetry.  An approximate (isotropic)
 treatment of cell esds is used for estimating esds involving l.s. planes.
;
loop_
  _geom_bond_atom_site_label_1
  _geom_bond_atom_site_label_2
  _geom_bond_distance
  _geom_bond_site_symmetry_2
  _geom_bond_publ_flag
 Br1 C1 1.873(5) . ?
 Br2 C3 1.887(5) . ?
 Br3 C29 1.908(5) . ?
 Br4 C27 1.884(4) . ?
 Br4 Na1 3.266(2) . ?
 Br5 C57 1.891(4) . ?
 Br5 Na1 3.332(2) . ?
 Br6 C59 1.873(4) . ?
 Br7 C34 1.837(7) . ?
 Br8 C32 1.876(5) . ?
 C1 C2 1.396(8) . ?
 C1 C6 1.412(8) . ?
 C2 H2 0.9300 . ?
 C2 C3 1.373(7) . ?
 C3 C4 1.391(7) . ?
 C4 C5 1.416(7) . ?
 C4 O1 1.326(5) . ?
 C5 C6 1.336(7) . ?
 C5 C7 1.487(7) . ?
 C6 H6 0.9300 . ?
 C7 H7 0.9300 . ?
 C7 N1 1.262(7) . ?
 C8 H8A 0.9700 . ?
 C8 H8B 0.9700 . ?
 C8 C9 1.452(8) . ?
 C8 O2 1.474(6) . ?
 C9 H9A 0.9700 . ?
 C9 H9B 0.9700 . ?
 C9 O3 1.460(6) . ?
 C10 H10 0.9300 . ?
 C10 C11 1.405(6) . ?
 C10 N2 1.285(6) . ?
 C11 C12 1.482(7) . ?
 C11 C20 1.381(6) . ?
 C12 C13 1.407(7) . ?
 C12 C17 1.403(7) . ?
 C13 H13 0.9300 . ?
 C13 C14 1.364(7) . ?
 C14 H14 0.9300 . ?
 C14 C15 1.382(8) . ?
 C15 H15 0.9300 . ?
 C15 C16 1.363(7) . ?
 C16 H16 0.9300 . ?
 C16 C17 1.409(7) . ?
 C17 C18 1.441(7) . ?
 C18 C19 1.374(7) . ?
 C18 C21 1.419(7) . ?
 C19 C20 1.469(7) . ?
 C19 O5 1.335(6) . ?
 C20 O4 1.296(6) . ?
 C21 H21 0.9300 . ?
 C21 N3 1.301(6) . ?
 C22 H22A 0.9700 . ?
 C22 H22B 0.9700 . ?
 C22 C23 1.517(8) . ?
 C22 O6 1.412(7) . ?
 C23 H23A 0.9700 . ?
 C23 H23B 0.9700 . ?
 C23 O7 1.467(7) . ?
 C24 H24 0.9300 . ?
 C24 C25 1.432(6) . ?
 C24 N4 1.304(6) . ?
 C25 C26 1.427(6) . ?
 C25 C30 1.380(7) . ?
 C26 C27 1.410(7) . ?
 C26 O8 1.302(6) . ?
 C27 C28 1.382(7) . ?
 C28 H28 0.9300 . ?
 C28 C29 1.385(7) . ?
 C29 C30 1.330(7) . ?
 C30 H30 0.9300 . ?
 C31 C32 1.419(8) . ?
 C31 C36 1.401(8) . ?
 C31 O9 1.337(7) . ?
 C32 C33 1.368(8) . ?
 C33 H33 0.9300 . ?
 C33 C34 1.382(8) . ?
 C34 C35 1.455(8) . ?
 C35 H35 0.9300 . ?
 C35 C36 1.378(8) . ?
 C36 C37 1.437(8) . ?
 C37 H37 0.9300 . ?
 C37 N5 1.291(7) . ?
 C38 H38A 0.9700 . ?
 C38 H38B 0.9700 . ?
 C38 C39 1.470(8) . ?
 C38 O10 1.426(7) . ?
 C39 H39A 0.9700 . ?
 C39 H39B 0.9700 . ?
 C39 O11 1.405(7) . ?
 C40 H40 0.9300 . ?
 C40 C41 1.412(7) . ?
 C40 N6 1.320(6) . ?
 C41 C42 1.468(7) . ?
 C41 C50 1.421(7) . ?
 C42 C43 1.403(7) . ?
 C42 C47 1.409(8) . ?
 C43 H43 0.9300 . ?
 C43 C44 1.452(7) . ?
 C44 H44 0.9300 . ?
 C44 C45 1.350(8) . ?
 C45 H45 0.9300 . ?
 C45 C46 1.368(7) . ?
 C46 H46 0.9300 . ?
 C46 C47 1.423(7) . ?
 C47 C48 1.468(7) . ?
 C48 C49 1.384(7) . ?
 C48 C51 1.467(7) . ?
 C49 C50 1.439(7) . ?
 C49 O15 1.337(6) . ?
 C50 O14 1.288(6) . ?
 C51 H51 0.9300 . ?
 C51 N7 1.229(6) . ?
 C52 H52A 0.9700 . ?
 C52 H52B 0.9700 . ?
 C52 C53 1.553(8) . ?
 C52 O12 1.429(6) . ?
 C53 H53A 0.9700 . ?
 C53 H53B 0.9700 . ?
 C53 O13 1.421(6) . ?
 C54 H54 0.9300 . ?
 C54 C55 1.450(7) . ?
 C54 N8 1.316(6) . ?
 C55 C56 1.389(7) . ?
 C55 C60 1.374(7) . ?
 C56 C57 1.405(7) . ?
 C56 O16 1.310(6) . ?
 C57 C58 1.371(6) . ?
 C58 H58 0.9300 . ?
 C58 C59 1.423(7) . ?
 C59 C60 1.397(7) . ?
 C60 H60 0.9300 . ?
 C61 C62 1.357(7) . ?
 C61 C66 1.490(7) . ?
 C61 N11 1.435(6) . ?
 C62 H62 0.9300 . ?
 C62 C63 1.334(7) . ?
 C63 C64 1.358(7) . ?
 C63 N10 1.495(6) . ?
 C64 H64 0.9300 . ?
 C64 C65 1.402(7) . ?
 C65 C66 1.384(7) . ?
 C65 N9 1.459(6) . ?
 C66 O23 1.265(6) . ?
 Cu1 N3 1.921(4) . ?
 Cu1 N4 1.975(4) . ?
 Cu1 Na1 3.440(2) . ?
 Cu1 O5 1.888(3) . ?
 Cu1 O8 1.901(3) . ?
 Cu2 N2 1.963(4) . ?
 Cu2 N6 1.911(4) . ?
 Cu2 Na1 3.5580(19) . ?
 Cu2 O4 1.892(3) . ?
 Cu2 O14 1.909(3) . ?
 Cu3 N7 1.936(4) . ?
 Cu3 N8 1.995(4) . ?
 Cu3 Na1 3.5004(19) . ?
 Cu3 O15 1.892(3) . ?
 Cu3 O16 1.900(3) . ?
 N1 O2 1.381(6) . ?
 N2 O3 1.452(5) . ?
 N3 O6 1.421(5) . ?
 N4 O7 1.414(5) . ?
 N5 O10 1.393(6) . ?
 N6 O11 1.424(5) . ?
 N7 O12 1.436(5) . ?
 N8 O13 1.420(5) . ?
 N9 O21 1.161(6) . ?
 N9 O22 1.059(6) . ?
 N10 O17 1.226(6) . ?
 N10 O18 1.206(5) . ?
 N11 O19 1.225(5) . ?
 N11 O20 1.157(5) . ?
 Na1 O4 2.501(4) . ?
 Na1 O5 2.424(4) . ?
 Na1 O8 2.588(4) . ?
 Na1 O14 2.478(4) . ?
 Na1 O15 2.460(4) . ?
 Na1 O16 2.639(4) . ?
 O1 H1 0.9599 . ?
 O9 H9 0.8205 . ?

loop_
  _geom_angle_atom_site_label_1
  _geom_angle_atom_site_label_2
  _geom_angle_atom_site_label_3
  _geom_angle
  _geom_angle_site_symmetry_1
  _geom_angle_site_symmetry_3
  _geom_angle_publ_flag
 C27 Br4 Na1 94.12(15) . . ?
 C57 Br5 Na1 93.82(16) . . ?
 C2 C1 Br1 119.5(4) . . ?
 C2 C1 C6 119.7(5) . . ?
 C6 C1 Br1 120.6(4) . . ?
 C1 C2 H2 120.5 . . ?
 C3 C2 C1 118.9(5) . . ?
 C3 C2 H2 120.5 . . ?
 C2 C3 Br2 119.9(4) . . ?
 C2 C3 C4 122.6(5) . . ?
 C4 C3 Br2 117.4(4) . . ?
 C3 C4 C5 116.4(4) . . ?
 O1 C4 C3 120.0(4) . . ?
 O1 C4 C5 123.6(5) . . ?
 C4 C5 C7 119.9(4) . . ?
 C6 C5 C4 122.8(5) . . ?
 C6 C5 C7 117.3(5) . . ?
 C1 C6 H6 120.3 . . ?
 C5 C6 C1 119.5(5) . . ?
 C5 C6 H6 120.3 . . ?
 C5 C7 H7 118.9 . . ?
 N1 C7 C5 122.2(5) . . ?
 N1 C7 H7 118.9 . . ?
 H8A C8 H8B 108.4 . . ?
 C9 C8 H8A 110.1 . . ?
 C9 C8 H8B 110.1 . . ?
 C9 C8 O2 107.9(4) . . ?
 O2 C8 H8A 110.1 . . ?
 O2 C8 H8B 110.1 . . ?
 C8 C9 H9A 108.4 . . ?
 C8 C9 H9B 108.4 . . ?
 C8 C9 O3 115.5(4) . . ?
 H9A C9 H9B 107.5 . . ?
 O3 C9 H9A 108.4 . . ?
 O3 C9 H9B 108.4 . . ?
 C11 C10 H10 117.1 . . ?
 N2 C10 H10 117.1 . . ?
 N2 C10 C11 125.8(4) . . ?
 C10 C11 C12 119.3(4) . . ?
 C20 C11 C10 120.5(4) . . ?
 C20 C11 C12 120.0(4) . . ?
 C13 C12 C11 122.6(5) . . ?
 C17 C12 C11 118.9(4) . . ?
 C17 C12 C13 118.3(5) . . ?
 C12 C13 H13 118.6 . . ?
 C14 C13 C12 122.7(5) . . ?
 C14 C13 H13 118.6 . . ?
 C13 C14 H14 120.6 . . ?
 C13 C14 C15 118.7(5) . . ?
 C15 C14 H14 120.6 . . ?
 C14 C15 H15 119.9 . . ?
 C16 C15 C14 120.2(5) . . ?
 C16 C15 H15 119.9 . . ?
 C15 C16 H16 118.9 . . ?
 C15 C16 C17 122.3(5) . . ?
 C17 C16 H16 118.9 . . ?
 C12 C17 C16 117.6(5) . . ?
 C12 C17 C18 120.4(5) . . ?
 C16 C17 C18 121.9(5) . . ?
 C19 C18 C17 120.3(5) . . ?
 C19 C18 C21 120.0(5) . . ?
 C21 C18 C17 119.7(5) . . ?
 C18 C19 C20 120.8(4) . . ?
 O5 C19 C18 125.6(5) . . ?
 O5 C19 C20 113.7(4) . . ?
 C11 C20 C19 119.4(4) . . ?
 O4 C20 C11 125.4(4) . . ?
 O4 C20 C19 115.2(4) . . ?
 C18 C21 H21 117.1 . . ?
 N3 C21 C18 125.7(5) . . ?
 N3 C21 H21 117.1 . . ?
 H22A C22 H22B 107.5 . . ?
 C23 C22 H22A 108.4 . . ?
 C23 C22 H22B 108.4 . . ?
 O6 C22 H22A 108.4 . . ?
 O6 C22 H22B 108.4 . . ?
 O6 C22 C23 115.5(5) . . ?
 C22 C23 H23A 109.8 . . ?
 C22 C23 H23B 109.8 . . ?
 H23A C23 H23B 108.2 . . ?
 O7 C23 C22 109.5(5) . . ?
 O7 C23 H23A 109.8 . . ?
 O7 C23 H23B 109.8 . . ?
 C25 C24 H24 116.9 . . ?
 N4 C24 H24 116.9 . . ?
 N4 C24 C25 126.2(4) . . ?
 C26 C25 C24 121.6(4) . . ?
 C30 C25 C24 116.8(4) . . ?
 C30 C25 C26 121.6(5) . . ?
 C27 C26 C25 115.1(4) . . ?
 O8 C26 C25 123.6(5) . . ?
 O8 C26 C27 121.3(4) . . ?
 C26 C27 Br4 117.3(3) . . ?
 C28 C27 Br4 120.3(4) . . ?
 C28 C27 C26 122.3(4) . . ?
 C27 C28 H28 120.7 . . ?
 C27 C28 C29 118.7(5) . . ?
 C29 C28 H28 120.7 . . ?
 C28 C29 Br3 116.2(4) . . ?
 C30 C29 Br3 121.9(4) . . ?
 C30 C29 C28 121.8(5) . . ?
 C25 C30 H30 119.8 . . ?
 C29 C30 C25 120.3(5) . . ?
 C29 C30 H30 119.8 . . ?
 C36 C31 C32 119.0(6) . . ?
 O9 C31 C32 120.3(5) . . ?
 O9 C31 C36 120.7(6) . . ?
 C31 C32 Br8 118.2(4) . . ?
 C33 C32 Br8 120.7(4) . . ?
 C33 C32 C31 121.0(5) . . ?
 C32 C33 H33 119.3 . . ?
 C32 C33 C34 121.4(5) . . ?
 C34 C33 H33 119.3 . . ?
 C33 C34 Br7 121.3(4) . . ?
 C33 C34 C35 117.8(6) . . ?
 C35 C34 Br7 120.9(4) . . ?
 C34 C35 H35 119.6 . . ?
 C36 C35 C34 120.8(5) . . ?
 C36 C35 H35 119.6 . . ?
 C31 C36 C37 125.7(6) . . ?
 C35 C36 C31 119.9(5) . . ?
 C35 C36 C37 114.4(5) . . ?
 C36 C37 H37 120.9 . . ?
 N5 C37 C36 118.2(6) . . ?
 N5 C37 H37 120.9 . . ?
 H38A C38 H38B 108.0 . . ?
 C39 C38 H38A 109.4 . . ?
 C39 C38 H38B 109.4 . . ?
 O10 C38 H38A 109.4 . . ?
 O10 C38 H38B 109.4 . . ?
 O10 C38 C39 111.1(5) . . ?
 C38 C39 H39A 108.3 . . ?
 C38 C39 H39B 108.3 . . ?
 H39A C39 H39B 107.4 . . ?
 O11 C39 C38 116.1(5) . . ?
 O11 C39 H39A 108.3 . . ?
 O11 C39 H39B 108.3 . . ?
 C41 C40 H40 116.9 . . ?
 N6 C40 H40 116.9 . . ?
 N6 C40 C41 126.2(5) . . ?
 C40 C41 C42 120.3(5) . . ?
 C40 C41 C50 120.9(5) . . ?
 C50 C41 C42 118.8(5) . . ?
 C43 C42 C41 118.5(5) . . ?
 C43 C42 C47 120.4(5) . . ?
 C47 C42 C41 121.1(5) . . ?
 C42 C43 H43 120.4 . . ?
 C42 C43 C44 119.2(5) . . ?
 C44 C43 H43 120.4 . . ?
 C43 C44 H44 120.4 . . ?
 C45 C44 C43 119.2(5) . . ?
 C45 C44 H44 120.4 . . ?
 C44 C45 H45 119.0 . . ?
 C44 C45 C46 121.9(5) . . ?
 C46 C45 H45 119.0 . . ?
 C45 C46 H46 119.3 . . ?
 C45 C46 C47 121.3(5) . . ?
 C47 C46 H46 119.3 . . ?
 C42 C47 C46 117.9(5) . . ?
 C42 C47 C48 118.2(5) . . ?
 C46 C47 C48 123.9(5) . . ?
 C49 C48 C47 120.3(5) . . ?
 C49 C48 C51 120.4(5) . . ?
 C51 C48 C47 119.1(5) . . ?
 C48 C49 C50 121.9(5) . . ?
 O15 C49 C48 124.6(4) . . ?
 O15 C49 C50 113.3(4) . . ?
 C41 C50 C49 118.9(5) . . ?
 O14 C50 C41 122.5(4) . . ?
 O14 C50 C49 118.4(4) . . ?
 C48 C51 H51 118.1 . . ?
 N7 C51 C48 123.8(5) . . ?
 N7 C51 H51 118.1 . . ?
 H52A C52 H52B 108.0 . . ?
 C53 C52 H52A 109.4 . . ?
 C53 C52 H52B 109.4 . . ?
 O12 C52 H52A 109.4 . . ?
 O12 C52 H52B 109.4 . . ?
 O12 C52 C53 111.1(4) . . ?
 C52 C53 H53A 108.6 . . ?
 C52 C53 H53B 108.6 . . ?
 H53A C53 H53B 107.6 . . ?
 O13 C53 C52 114.5(5) . . ?
 O13 C53 H53A 108.6 . . ?
 O13 C53 H53B 108.6 . . ?
 C55 C54 H54 117.5 . . ?
 N8 C54 H54 117.5 . . ?
 N8 C54 C55 125.0(4) . . ?
 C56 C55 C54 122.5(5) . . ?
 C60 C55 C54 114.1(4) . . ?
 C60 C55 C56 123.0(5) . . ?
 C55 C56 C57 115.7(5) . . ?
 O16 C56 C55 124.8(5) . . ?
 O16 C56 C57 119.4(4) . . ?
 C56 C57 Br5 118.4(3) . . ?
 C58 C57 Br5 118.0(4) . . ?
 C58 C57 C56 123.5(4) . . ?
 C57 C58 H58 120.6 . . ?
 C57 C58 C59 118.8(5) . . ?
 C59 C58 H58 120.6 . . ?
 C58 C59 Br6 119.0(4) . . ?
 C60 C59 Br6 122.3(4) . . ?
 C60 C59 C58 118.7(4) . . ?
 C55 C60 C59 120.0(4) . . ?
 C55 C60 H60 120.0 . . ?
 C59 C60 H60 120.0 . . ?
 C62 C61 C66 121.7(5) . . ?
 C62 C61 N11 118.3(5) . . ?
 N11 C61 C66 120.1(5) . . ?
 C61 C62 H62 119.9 . . ?
 C63 C62 C61 120.3(5) . . ?
 C63 C62 H62 119.9 . . ?
 C62 C63 C64 122.6(5) . . ?
 C62 C63 N10 120.4(5) . . ?
 C64 C63 N10 117.0(5) . . ?
 C63 C64 H64 120.8 . . ?
 C63 C64 C65 118.3(5) . . ?
 C65 C64 H64 120.8 . . ?
 C64 C65 N9 115.8(4) . . ?
 C66 C65 C64 123.7(5) . . ?
 C66 C65 N9 120.5(4) . . ?
 C65 C66 C61 112.7(4) . . ?
 O23 C66 C61 123.4(5) . . ?
 O23 C66 C65 123.9(5) . . ?
 N3 Cu1 N4 100.21(17) . . ?
 N3 Cu1 Na1 131.73(13) . . ?
 N4 Cu1 Na1 124.06(13) . . ?
 O5 Cu1 N3 89.31(15) . . ?
 O5 Cu1 N4 161.71(17) . . ?
 O5 Cu1 Na1 42.87(10) . . ?
 O5 Cu1 O8 85.11(14) . . ?
 O8 Cu1 N3 160.26(17) . . ?
 O8 Cu1 N4 90.63(16) . . ?
 O8 Cu1 Na1 48.01(11) . . ?
 N2 Cu2 Na1 129.77(12) . . ?
 N6 Cu2 N2 100.86(17) . . ?
 N6 Cu2 Na1 129.35(13) . . ?
 O4 Cu2 N2 88.52(15) . . ?
 O4 Cu2 N6 165.83(18) . . ?
 O4 Cu2 Na1 42.13(10) . . ?
 O4 Cu2 O14 83.57(14) . . ?
 O14 Cu2 N2 163.36(17) . . ?
 O14 Cu2 N6 89.84(16) . . ?
 O14 Cu2 Na1 41.57(10) . . ?
 N7 Cu3 N8 100.28(16) . . ?
 N7 Cu3 Na1 131.11(12) . . ?
 N8 Cu3 Na1 124.10(12) . . ?
 O15 Cu3 N7 88.95(16) . . ?
 O15 Cu3 N8 159.10(16) . . ?
 O15 Cu3 Na1 42.40(10) . . ?
 O15 Cu3 O16 85.64(14) . . ?
 O16 Cu3 N7 160.47(17) . . ?
 O16 Cu3 N8 91.19(14) . . ?
 O16 Cu3 Na1 48.03(10) . . ?
 C7 N1 O2 111.5(4) . . ?
 C10 N2 Cu2 127.7(3) . . ?
 C10 N2 O3 111.0(4) . . ?
 O3 N2 Cu2 121.3(3) . . ?
 C21 N3 Cu1 129.3(3) . . ?
 C21 N3 O6 112.1(4) . . ?
 O6 N3 Cu1 117.9(3) . . ?
 C24 N4 Cu1 125.2(3) . . ?
 C24 N4 O7 108.1(4) . . ?
 O7 N4 Cu1 126.5(3) . . ?
 C37 N5 O10 110.5(5) . . ?
 C40 N6 Cu2 126.5(3) . . ?
 C40 N6 O11 109.8(4) . . ?
 O11 N6 Cu2 123.7(3) . . ?
 C51 N7 Cu3 132.1(4) . . ?
 C51 N7 O12 113.4(4) . . ?
 O12 N7 Cu3 114.4(3) . . ?
 C54 N8 Cu3 124.7(3) . . ?
 C54 N8 O13 108.2(4) . . ?
 O13 N8 Cu3 127.1(3) . . ?
 O21 N9 C65 114.6(5) . . ?
 O22 N9 C65 116.5(5) . . ?
 O22 N9 O21 128.9(6) . . ?
 O17 N10 C63 118.4(4) . . ?
 O18 N10 C63 117.1(5) . . ?
 O18 N10 O17 124.3(4) . . ?
 O19 N11 C61 118.2(4) . . ?
 O20 N11 C61 122.4(5) . . ?
 O20 N11 O19 119.2(4) . . ?
 Br4 Na1 Br5 135.41(6) . . ?
 Br4 Na1 Cu1 91.61(5) . . ?
 Br4 Na1 Cu2 104.86(6) . . ?
 Br4 Na1 Cu3 65.33(4) . . ?
 Br5 Na1 Cu1 63.57(4) . . ?
 Br5 Na1 Cu2 119.69(6) . . ?
 Br5 Na1 Cu3 88.88(5) . . ?
 Cu1 Na1 Cu2 123.33(5) . . ?
 Cu1 Na1 Cu3 111.46(5) . . ?
 Cu3 Na1 Cu2 124.81(6) . . ?
 O4 Na1 Br4 119.13(11) . . ?
 O4 Na1 Br5 100.20(10) . . ?
 O4 Na1 Cu1 94.40(9) . . ?
 O4 Na1 Cu2 30.51(8) . . ?
 O4 Na1 Cu3 153.93(11) . . ?
 O4 Na1 O8 117.95(13) . . ?
 O4 Na1 O16 156.28(15) . . ?
 O5 Na1 Br4 108.94(11) . . ?
 O5 Na1 Br5 69.85(10) . . ?
 O5 Na1 Cu1 32.00(8) . . ?
 O5 Na1 Cu2 92.26(9) . . ?
 O5 Na1 Cu3 142.93(10) . . ?
 O5 Na1 O4 62.54(11) . . ?
 O5 Na1 O8 61.40(12) . . ?
 O5 Na1 O14 122.78(13) . . ?
 O5 Na1 O15 174.14(13) . . ?
 O5 Na1 O16 113.74(12) . . ?
 O8 Na1 Br4 60.42(9) . . ?
 O8 Na1 Br5 83.80(9) . . ?
 O8 Na1 Cu1 33.09(8) . . ?
 O8 Na1 Cu2 137.62(11) . . ?
 O8 Na1 Cu3 87.13(9) . . ?
 O8 Na1 O16 73.60(11) . . ?
 O14 Na1 Br4 89.79(10) . . ?
 O14 Na1 Br5 129.69(12) . . ?
 O14 Na1 Cu1 152.27(11) . . ?
 O14 Na1 Cu2 30.75(8) . . ?
 O14 Na1 Cu3 94.24(9) . . ?
 O14 Na1 O4 61.17(11) . . ?
 O14 Na1 O8 146.47(15) . . ?
 O14 Na1 O16 121.73(13) . . ?
 O15 Na1 Br4 69.91(10) . . ?
 O15 Na1 Br5 106.70(11) . . ?
 O15 Na1 Cu1 142.36(10) . . ?
 O15 Na1 Cu2 93.58(9) . . ?
 O15 Na1 Cu3 31.23(7) . . ?
 O15 Na1 O4 123.20(13) . . ?
 O15 Na1 O8 114.00(13) . . ?
 O15 Na1 O14 63.08(11) . . ?
 O15 Na1 O16 60.59(11) . . ?
 O16 Na1 Br4 84.53(9) . . ?
 O16 Na1 Br5 58.82(8) . . ?
 O16 Na1 Cu1 85.96(9) . . ?
 O16 Na1 Cu2 148.15(10) . . ?
 O16 Na1 Cu3 32.37(7) . . ?
 C4 O1 H1 108.6 . . ?
 N1 O2 C8 109.2(4) . . ?
 N2 O3 C9 111.5(4) . . ?
 C20 O4 Cu2 129.7(3) . . ?
 C20 O4 Na1 122.7(3) . . ?
 Cu2 O4 Na1 107.36(15) . . ?
 C19 O5 Cu1 129.9(3) . . ?
 C19 O5 Na1 124.9(3) . . ?
 Cu1 O5 Na1 105.12(14) . . ?
 C22 O6 N3 109.7(4) . . ?
 N4 O7 C23 111.5(4) . . ?
 C26 O8 Cu1 129.4(3) . . ?
 C26 O8 Na1 127.5(3) . . ?
 Cu1 O8 Na1 98.90(14) . . ?
 C31 O9 H9 108.9 . . ?
 N5 O10 C38 116.0(4) . . ?
 C39 O11 N6 112.7(4) . . ?
 C52 O12 N7 110.3(4) . . ?
 N8 O13 C53 112.7(3) . . ?
 C50 O14 Cu2 130.6(3) . . ?
 C50 O14 Na1 121.6(3) . . ?
 Cu2 O14 Na1 107.68(15) . . ?
 C49 O15 Cu3 129.4(3) . . ?
 C49 O15 Na1 123.0(3) . . ?
 Cu3 O15 Na1 106.37(15) . . ?
 C56 O16 Cu3 128.3(3) . . ?
 C56 O16 Na1 127.8(3) . . ?
 Cu3 O16 Na1 99.61(13) . . ?

loop_
  _geom_torsion_atom_site_label_1
  _geom_torsion_atom_site_label_2
  _geom_torsion_atom_site_label_3
  _geom_torsion_atom_site_label_4
  _geom_torsion
  _geom_torsion_site_symmetry_1
  _geom_torsion_site_symmetry_2
  _geom_torsion_site_symmetry_3
  _geom_torsion_site_symmetry_4
  _geom_torsion_publ_flag
 Br1 C1 C2 C3 175.9(5) . . . . ?
 Br1 C1 C6 C5 -177.1(4) . . . . ?
 Br2 C3 C4 C5 -179.8(4) . . . . ?
 Br2 C3 C4 O1 -0.5(7) . . . . ?
 Br3 C29 C30 C25 178.8(4) . . . . ?
 Br4 C27 C28 C29 179.8(4) . . . . ?
 Br5 C57 C58 C59 180.0(4) . . . . ?
 Br6 C59 C60 C55 -176.8(4) . . . . ?
 Br7 C34 C35 C36 179.9(4) . . . . ?
 Br8 C32 C33 C34 -174.2(5) . . . . ?
 C1 C2 C3 Br2 -180.0(5) . . . . ?
 C1 C2 C3 C4 -0.6(9) . . . . ?
 C2 C1 C6 C5 -2.8(9) . . . . ?
 C2 C3 C4 C5 0.8(9) . . . . ?
 C2 C3 C4 O1 -180.0(5) . . . . ?
 C3 C4 C5 C6 -2.1(8) . . . . ?
 C3 C4 C5 C7 179.2(5) . . . . ?
 C4 C5 C6 C1 3.1(9) . . . . ?
 C4 C5 C7 N1 1.9(8) . . . . ?
 C5 C7 N1 O2 176.3(4) . . . . ?
 C6 C1 C2 C3 1.5(9) . . . . ?
 C6 C5 C7 N1 -176.8(5) . . . . ?
 C7 C5 C6 C1 -178.1(5) . . . . ?
 C7 N1 O2 C8 176.6(5) . . . . ?
 C8 C9 O3 N2 72.0(6) . . . . ?
 C9 C8 O2 N1 176.7(5) . . . . ?
 C10 C11 C12 C13 5.3(8) . . . . ?
 C10 C11 C12 C17 -179.5(5) . . . . ?
 C10 C11 C20 C19 178.9(5) . . . . ?
 C10 C11 C20 O4 -3.4(9) . . . . ?
 C10 N2 O3 C9 91.3(5) . . . . ?
 C11 C10 N2 Cu2 0.4(8) . . . . ?
 C11 C10 N2 O3 179.5(5) . . . . ?
 C11 C12 C13 C14 179.2(5) . . . . ?
 C11 C12 C17 C16 -177.5(5) . . . . ?
 C11 C12 C17 C18 2.0(8) . . . . ?
 C11 C20 O4 Cu2 -12.9(8) . . . . ?
 C11 C20 O4 Na1 173.9(4) . . . . ?
 C12 C11 C20 C19 4.4(8) . . . . ?
 C12 C11 C20 O4 -177.9(5) . . . . ?
 C12 C13 C14 C15 -3.9(9) . . . . ?
 C12 C17 C18 C19 1.3(8) . . . . ?
 C12 C17 C18 C21 -178.5(5) . . . . ?
 C13 C12 C17 C16 -2.0(8) . . . . ?
 C13 C12 C17 C18 177.5(5) . . . . ?
 C13 C14 C15 C16 2.0(9) . . . . ?
 C14 C15 C16 C17 -0.3(9) . . . . ?
 C15 C16 C17 C12 0.3(9) . . . . ?
 C15 C16 C17 C18 -179.2(5) . . . . ?
 C16 C17 C18 C19 -179.3(5) . . . . ?
 C16 C17 C18 C21 1.0(8) . . . . ?
 C17 C12 C13 C14 3.9(9) . . . . ?
 C17 C18 C19 C20 -1.8(8) . . . . ?
 C17 C18 C19 O5 178.7(5) . . . . ?
 C17 C18 C21 N3 -178.4(5) . . . . ?
 C18 C19 C20 C11 -1.1(8) . . . . ?
 C18 C19 C20 O4 -179.1(5) . . . . ?
 C18 C19 O5 Cu1 4.0(8) . . . . ?
 C18 C19 O5 Na1 -172.6(4) . . . . ?
 C18 C21 N3 Cu1 -4.6(8) . . . . ?
 C18 C21 N3 O6 -174.8(5) . . . . ?
 C19 C18 C21 N3 1.8(9) . . . . ?
 C19 C20 O4 Cu2 165.0(4) . . . . ?
 C19 C20 O4 Na1 -8.2(6) . . . . ?
 C20 C11 C12 C13 179.9(5) . . . . ?
 C20 C11 C12 C17 -4.9(8) . . . . ?
 C20 C19 O5 Cu1 -175.4(3) . . . . ?
 C20 C19 O5 Na1 7.9(6) . . . . ?
 C21 C18 C19 C20 177.9(5) . . . . ?
 C21 C18 C19 O5 -1.5(9) . . . . ?
 C21 N3 O6 C22 -100.9(5) . . . . ?
 C22 C23 O7 N4 91.8(5) . . . . ?
 C23 C22 O6 N3 -52.3(6) . . . . ?
 C24 C25 C26 C27 179.7(5) . . . . ?
 C24 C25 C26 O8 -1.2(8) . . . . ?
 C24 C25 C30 C29 -175.5(5) . . . . ?
 C24 N4 O7 C23 168.8(4) . . . . ?
 C25 C24 N4 Cu1 9.4(8) . . . . ?
 C25 C24 N4 O7 -175.9(5) . . . . ?
 C25 C26 C27 Br4 178.5(4) . . . . ?
 C25 C26 C27 C28 -4.6(7) . . . . ?
 C25 C26 O8 Cu1 -14.3(7) . . . . ?
 C25 C26 O8 Na1 137.8(4) . . . . ?
 C26 C25 C30 C29 2.3(8) . . . . ?
 C26 C27 C28 C29 3.1(8) . . . . ?
 C27 C26 O8 Cu1 164.7(4) . . . . ?
 C27 C26 O8 Na1 -43.1(6) . . . . ?
 C27 C28 C29 Br3 178.7(4) . . . . ?
 C27 C28 C29 C30 1.5(8) . . . . ?
 C28 C29 C30 C25 -4.2(8) . . . . ?
 C30 C25 C26 C27 1.9(7) . . . . ?
 C30 C25 C26 O8 -178.9(5) . . . . ?
 C31 C32 C33 C34 3.6(9) . . . . ?
 C31 C36 C37 N5 -2.9(10) . . . . ?
 C32 C31 C36 C35 1.6(9) . . . . ?
 C32 C31 C36 C37 -176.9(6) . . . . ?
 C32 C33 C34 Br7 179.0(5) . . . . ?
 C32 C33 C34 C35 -3.3(9) . . . . ?
 C33 C34 C35 C36 2.1(9) . . . . ?
 C34 C35 C36 C31 -1.4(9) . . . . ?
 C34 C35 C36 C37 177.3(5) . . . . ?
 C35 C36 C37 N5 178.5(5) . . . . ?
 C36 C31 C32 Br8 175.2(4) . . . . ?
 C36 C31 C32 C33 -2.7(9) . . . . ?
 C36 C37 N5 O10 177.6(5) . . . . ?
 C37 N5 O10 C38 160.2(5) . . . . ?
 C38 C39 O11 N6 72.6(6) . . . . ?
 C39 C38 O10 N5 -178.1(5) . . . . ?
 C40 C41 C42 C43 11.1(8) . . . . ?
 C40 C41 C42 C47 -170.3(5) . . . . ?
 C40 C41 C50 C49 168.2(5) . . . . ?
 C40 C41 C50 O14 -6.2(8) . . . . ?
 C40 N6 O11 C39 97.5(5) . . . . ?
 C41 C40 N6 Cu2 3.6(8) . . . . ?
 C41 C40 N6 O11 -175.2(5) . . . . ?
 C41 C42 C43 C44 179.6(5) . . . . ?
 C41 C42 C47 C46 178.9(5) . . . . ?
 C41 C42 C47 C48 -3.1(9) . . . . ?
 C41 C50 O14 Cu2 -12.1(8) . . . . ?
 C41 C50 O14 Na1 171.1(4) . . . . ?
 C42 C41 C50 C49 -10.9(8) . . . . ?
 C42 C41 C50 O14 174.6(5) . . . . ?
 C42 C43 C44 C45 -0.2(9) . . . . ?
 C42 C47 C48 C49 -0.3(9) . . . . ?
 C42 C47 C48 C51 175.6(5) . . . . ?
 C43 C42 C47 C46 -2.6(9) . . . . ?
 C43 C42 C47 C48 175.4(5) . . . . ?
 C43 C44 C45 C46 1.0(10) . . . . ?
 C44 C45 C46 C47 -2.6(10) . . . . ?
 C45 C46 C47 C42 3.4(9) . . . . ?
 C45 C46 C47 C48 -174.5(6) . . . . ?
 C46 C47 C48 C49 177.6(6) . . . . ?
 C46 C47 C48 C51 -6.4(9) . . . . ?
 C47 C42 C43 C44 1.1(9) . . . . ?
 C47 C48 C49 C50 -2.0(9) . . . . ?
 C47 C48 C49 O15 -175.6(5) . . . . ?
 C47 C48 C51 N7 -178.2(5) . . . . ?
 C48 C49 C50 C41 7.8(8) . . . . ?
 C48 C49 C50 O14 -177.5(5) . . . . ?
 C48 C49 O15 Cu3 -11.9(8) . . . . ?
 C48 C49 O15 Na1 -177.3(4) . . . . ?
 C48 C51 N7 Cu3 -0.7(9) . . . . ?
 C48 C51 N7 O12 -176.7(5) . . . . ?
 C49 C48 C51 N7 -2.2(9) . . . . ?
 C49 C50 O14 Cu2 173.4(4) . . . . ?
 C49 C50 O14 Na1 -3.4(7) . . . . ?
 C50 C41 C42 C43 -169.7(5) . . . . ?
 C50 C41 C42 C47 8.8(8) . . . . ?
 C50 C49 O15 Cu3 174.0(4) . . . . ?
 C50 C49 O15 Na1 8.6(6) . . . . ?
 C51 C48 C49 C50 -177.9(5) . . . . ?
 C51 C48 C49 O15 8.5(9) . . . . ?
 C51 N7 O12 C52 -89.2(5) . . . . ?
 C52 C53 O13 N8 87.5(5) . . . . ?
 C53 C52 O12 N7 -57.6(5) . . . . ?
 C54 C55 C56 C57 -179.5(5) . . . . ?
 C54 C55 C56 O16 -4.1(8) . . . . ?
 C54 C55 C60 C59 -178.7(5) . . . . ?
 C54 N8 O13 C53 170.4(4) . . . . ?
 C55 C54 N8 Cu3 1.8(7) . . . . ?
 C55 C54 N8 O13 -179.1(5) . . . . ?
 C55 C56 C57 Br5 177.4(4) . . . . ?
 C55 C56 C57 C58 -6.6(8) . . . . ?
 C55 C56 O16 Cu3 -14.9(7) . . . . ?
 C55 C56 O16 Na1 136.7(4) . . . . ?
 C56 C55 C60 C59 -4.6(8) . . . . ?
 C56 C57 C58 C59 3.9(8) . . . . ?
 C57 C56 O16 Cu3 160.3(4) . . . . ?
 C57 C56 O16 Na1 -48.0(6) . . . . ?
 C57 C58 C59 Br6 177.2(4) . . . . ?
 C57 C58 C59 C60 -1.2(8) . . . . ?
 C58 C59 C60 C55 1.5(8) . . . . ?
 C60 C55 C56 C57 6.9(8) . . . . ?
 C60 C55 C56 O16 -177.8(5) . . . . ?
 C61 C62 C63 C64 -1.7(9) . . . . ?
 C61 C62 C63 N10 178.2(5) . . . . ?
 C62 C61 C66 C65 -9.2(8) . . . . ?
 C62 C61 C66 O23 167.6(6) . . . . ?
 C62 C61 N11 O19 -4.1(8) . . . . ?
 C62 C61 N11 O20 171.4(6) . . . . ?
 C62 C63 C64 C65 1.2(9) . . . . ?
 C62 C63 N10 O17 -168.8(5) . . . . ?
 C62 C63 N10 O18 7.1(8) . . . . ?
 C63 C64 C65 C66 -5.4(8) . . . . ?
 C63 C64 C65 N9 177.2(5) . . . . ?
 C64 C63 N10 O17 11.2(8) . . . . ?
 C64 C63 N10 O18 -173.0(5) . . . . ?
 C64 C65 C66 C61 8.9(8) . . . . ?
 C64 C65 C66 O23 -167.9(5) . . . . ?
 C64 C65 N9 O21 160.2(6) . . . . ?
 C64 C65 N9 O22 -22.2(8) . . . . ?
 C66 C61 C62 C63 6.0(9) . . . . ?
 C66 C61 N11 O19 175.6(5) . . . . ?
 C66 C61 N11 O20 -8.8(9) . . . . ?
 C66 C65 N9 O21 -17.3(8) . . . . ?
 C66 C65 N9 O22 160.3(6) . . . . ?
 Cu1 N3 O6 C22 87.7(5) . . . . ?
 Cu1 N4 O7 C23 -16.6(6) . . . . ?
 Cu2 N2 O3 C9 -89.6(4) . . . . ?
 Cu2 N6 O11 C39 -81.4(5) . . . . ?
 Cu3 N7 O12 C52 94.0(4) . . . . ?
 Cu3 N8 O13 C53 -10.5(6) . . . . ?
 N2 C10 C11 C12 -176.0(5) . . . . ?
 N2 C10 C11 C20 9.5(8) . . . . ?
 N2 Cu2 O4 C20 16.7(5) . . . . ?
 N2 Cu2 O4 Na1 -169.23(19) . . . . ?
 N3 Cu1 O5 C19 -4.7(4) . . . . ?
 N3 Cu1 O5 Na1 172.41(19) . . . . ?
 N4 C24 C25 C26 3.2(8) . . . . ?
 N4 C24 C25 C30 -179.0(5) . . . . ?
 N4 Cu1 O5 C19 -126.6(6) . . . . ?
 N4 Cu1 O5 Na1 50.5(6) . . . . ?
 N6 C40 C41 C42 -170.5(5) . . . . ?
 N6 C40 C41 C50 10.4(9) . . . . ?
 N6 Cu2 O4 C20 -115.2(7) . . . . ?
 N6 Cu2 O4 Na1 58.9(7) . . . . ?
 N7 Cu3 O15 C49 7.2(4) . . . . ?
 N7 Cu3 O15 Na1 174.43(19) . . . . ?
 N8 C54 C55 C56 10.5(8) . . . . ?
 N8 C54 C55 C60 -175.3(5) . . . . ?
 N8 Cu3 O15 C49 -109.7(5) . . . . ?
 N8 Cu3 O15 Na1 57.5(5) . . . . ?
 N9 C65 C66 C61 -173.8(5) . . . . ?
 N9 C65 C66 O23 9.4(9) . . . . ?
 N10 C63 C64 C65 -178.8(5) . . . . ?
 N11 C61 C62 C63 -174.2(5) . . . . ?
 N11 C61 C66 C65 171.0(5) . . . . ?
 N11 C61 C66 O23 -12.2(9) . . . . ?
 Na1 Br4 C27 C26 26.2(4) . . . . ?
 Na1 Br4 C27 C28 -150.7(4) . . . . ?
 Na1 Br5 C57 C56 25.9(4) . . . . ?
 Na1 Br5 C57 C58 -150.4(4) . . . . ?
 Na1 Cu1 O5 C19 -177.1(5) . . . . ?
 Na1 Cu2 O4 C20 -174.0(6) . . . . ?
 Na1 Cu3 O15 C49 -167.2(5) . . . . ?
 O1 C4 C5 C6 178.7(5) . . . . ?
 O1 C4 C5 C7 -0.1(8) . . . . ?
 O2 C8 C9 O3 -73.6(6) . . . . ?
 O5 C19 C20 C11 178.5(5) . . . . ?
 O5 C19 C20 O4 0.5(7) . . . . ?
 O6 C22 C23 O7 -57.4(6) . . . . ?
 O8 C26 C27 Br4 -0.6(6) . . . . ?
 O8 C26 C27 C28 176.2(5) . . . . ?
 O8 Cu1 O5 C19 156.3(4) . . . . ?
 O8 Cu1 O5 Na1 -26.54(16) . . . . ?
 O9 C31 C32 Br8 -1.8(8) . . . . ?
 O9 C31 C32 C33 -179.6(5) . . . . ?
 O9 C31 C36 C35 178.5(5) . . . . ?
 O9 C31 C36 C37 0.0(10) . . . . ?
 O10 C38 C39 O11 -73.0(7) . . . . ?
 O12 C52 C53 O13 -55.9(5) . . . . ?
 O14 Cu2 O4 C20 -177.9(5) . . . . ?
 O14 Cu2 O4 Na1 -3.90(17) . . . . ?
 O15 C49 C50 C41 -178.0(5) . . . . ?
 O15 C49 C50 O14 -3.3(7) . . . . ?
 O16 C56 C57 Br5 1.8(7) . . . . ?
 O16 C56 C57 C58 177.8(5) . . . . ?
 O16 Cu3 O15 C49 168.4(4) . . . . ?
 O16 Cu3 O15 Na1 -24.35(16) . . . . ?

_shelx_res_file
;
    d832.res created by SHELXL-2014/7

TITL in P21/n
CELL 0.71073 15.635 18.2157 28.691 90 91.787 90
ZERR 4 0.0014 0.0018 0.003 0 0.003 0
LATT 1
SYMM 0.5-X,0.5+Y,0.5-Z
SFAC C H Br Cu N Na O
UNIT 264 176 32 12 44 4 92
DELU 0.002 0.002 O21 N9 O22 N9 N5 C37
DELU 0.002 0.002 O7 N4 C18 C21 C31 C32

L.S. 15 0 7
PLAN  2
SIZE 0.24 0.22 0.2
TEMP 18
BOND $H
CONF
ABIN
fmap 2
acta
OMIT 0 0 4
OMIT -1 1 2
OMIT 2 2 2
REM <olex2.extras>
REM <HklSrc "%.\\D832.hkl">
REM </olex2.extras>

WGHT    0.064100    7.098500
FVAR       0.08464
BR1   3   -0.075243    0.315986    0.858760    11.00000    0.05187    0.06873 =
         0.05820    0.01298   -0.01365    0.01111
BR2   3    0.188201    0.305762    0.997859    11.00000    0.06003    0.06401 =
         0.03999   -0.00683   -0.00914    0.00357
BR3   3   -0.307487   -0.095480    0.740301    11.00000    0.05346    0.05421 =
         0.05400    0.01817    0.00874   -0.01790
BR4   3    0.040927   -0.019281    0.756247    11.00000    0.04808    0.04406 =
         0.03812    0.01380   -0.01428   -0.00558
BR5   3    0.007306    0.298563    0.690679    11.00000    0.04160    0.04176 =
         0.04585    0.01311    0.00537   -0.00548
BR6   3   -0.343118    0.295725    0.638467    11.00000    0.04926    0.05463 =
         0.04652    0.01561   -0.01816    0.00324
BR7   3   -0.033211   -0.051856    0.581429    11.00000    0.06310    0.06809 =
         0.04938   -0.01836   -0.01410    0.01415
BR8   3    0.261605    0.017140    0.482994    11.00000    0.07010    0.06522 =
         0.05861    0.00638    0.01460   -0.01129
C1    1    0.041479    0.315043    0.875548    11.00000    0.04676    0.05006 =
         0.05858    0.01202   -0.01054    0.00522
C2    1    0.066670    0.313435    0.922662    11.00000    0.05222    0.05553 =
         0.03672    0.00462    0.00812    0.00422
AFIX  43
H2    2    0.026151    0.315946    0.945660    11.00000   -1.20000
AFIX   0
C3    1    0.152224    0.308088    0.934493    11.00000    0.05900    0.04431 =
         0.04092    0.00211   -0.00946    0.01051
C4    1    0.215139    0.303545    0.901377    11.00000    0.04024    0.03682 =
         0.03308   -0.00877   -0.01432    0.01505
C5    1    0.186541    0.305647    0.854096    11.00000    0.04391    0.03872 =
         0.03644    0.00110   -0.01307   -0.01399
C6    1    0.103818    0.309384    0.841144    11.00000    0.05052    0.04448 =
         0.04040    0.00223   -0.00680    0.00813
AFIX  43
H6    2    0.087416    0.308267    0.809715    11.00000   -1.20000
AFIX   0
C7    1    0.249684    0.302098    0.816455    11.00000    0.05358    0.03546 =
         0.03550   -0.01195   -0.00407   -0.00041
AFIX  43
H7    2    0.230131    0.305044    0.785565    11.00000   -1.20000
AFIX   0
C8    1    0.466239    0.285392    0.796476    11.00000    0.04941    0.06791 =
         0.04535   -0.01327   -0.00139   -0.01407
AFIX  23
H8A   2    0.484814    0.330797    0.811270    11.00000   -1.20000
H8B   2    0.478107    0.245245    0.817927    11.00000   -1.20000
AFIX   0
C9    1    0.511298    0.274212    0.753538    11.00000    0.05003    0.03201 =
         0.06115    0.01197    0.00632   -0.01193
AFIX  23
H9A   2    0.571353    0.285279    0.759422    11.00000   -1.20000
H9B   2    0.489497    0.309076    0.730539    11.00000   -1.20000
AFIX   0
C10   1    0.415636    0.204484    0.670212    11.00000    0.03702    0.03589 =
         0.02996    0.00576    0.00518   -0.00089
AFIX  43
H10   2    0.464981    0.223397    0.657482    11.00000   -1.20000
AFIX   0
C11   1    0.343162    0.197704    0.640313    11.00000    0.03291    0.04167 =
         0.02702    0.01341   -0.00182   -0.00563
C12   1    0.350190    0.215902    0.590248    11.00000    0.05253    0.03401 =
         0.03930    0.00923    0.00580    0.00336
C13   1    0.428496    0.234177    0.570301    11.00000    0.04897    0.03907 =
         0.04706    0.00431    0.01511   -0.00229
AFIX  43
H13   2    0.477637    0.235439    0.589401    11.00000   -1.20000
AFIX   0
C14   1    0.435281    0.250105    0.524128    11.00000    0.07175    0.04386 =
         0.04120   -0.00380    0.02614   -0.01524
AFIX  43
H14   2    0.487298    0.264878    0.512363    11.00000   -1.20000
AFIX   0
C15   1    0.363396    0.243878    0.495159    11.00000    0.06998    0.04894 =
         0.03095    0.01728    0.01659    0.00163
AFIX  43
H15   2    0.367264    0.253013    0.463403    11.00000   -1.20000
AFIX   0
C16   1    0.286817    0.224392    0.512950    11.00000    0.05509    0.05511 =
         0.03790    0.01991    0.00998    0.01674
AFIX  43
H16   2    0.239167    0.220741    0.492861    11.00000   -1.20000
AFIX   0
C17   1    0.277335    0.209589    0.560719    11.00000    0.04635    0.04099 =
         0.03489   -0.00479    0.00965   -0.00285
C18   1    0.196421    0.188087    0.579144    11.00000    0.04955    0.03223 =
         0.03159    0.00870    0.00011    0.00118
C19   1    0.189381    0.174908    0.626006    11.00000    0.04179    0.03863 =
         0.03951   -0.00222    0.00519   -0.00340
C20   1    0.264461    0.180316    0.657912    11.00000    0.03714    0.03792 =
         0.03632    0.01405    0.00443   -0.00448
C21   1    0.123813    0.180274    0.548621    11.00000    0.05169    0.04142 =
         0.03321   -0.00401    0.00438   -0.00362
AFIX  43
H21   2    0.131795    0.188327    0.517045    11.00000   -1.20000
AFIX   0
C22   1   -0.061148    0.216307    0.515615    11.00000    0.07020    0.05505 =
         0.04306    0.01743   -0.01398   -0.00712
AFIX  23
H22A  2   -0.103437    0.206620    0.490925    11.00000   -1.20000
H22B  2   -0.025147    0.256064    0.505211    11.00000   -1.20000
AFIX   0
C23   1   -0.107390    0.241872    0.558405    11.00000    0.06545    0.03865 =
         0.04209    0.00867   -0.00950    0.00967
AFIX  23
H23A  2   -0.066030    0.256000    0.582667    11.00000   -1.20000
H23B  2   -0.142427    0.284342    0.550614    11.00000   -1.20000
AFIX   0
C24   1   -0.172978    0.096008    0.628344    11.00000    0.04575    0.02459 =
         0.03717    0.00664   -0.01173   -0.00819
AFIX  43
H24   2   -0.228868    0.097727    0.616314    11.00000   -1.20000
AFIX   0
C25   1   -0.156059    0.046472    0.666290    11.00000    0.03434    0.03477 =
         0.03849    0.00927    0.00472    0.00543
C26   1   -0.073622    0.042030    0.688917    11.00000    0.04237    0.03059 =
         0.03535   -0.01023   -0.00597   -0.00277
C27   1   -0.066890   -0.008968    0.725803    11.00000    0.03489    0.02793 =
         0.03964    0.00353   -0.00469   -0.00236
C28   1   -0.136595   -0.047733    0.741130    11.00000    0.05260    0.02212 =
         0.03941   -0.00739   -0.00008   -0.00543
AFIX  43
H28   2   -0.131042   -0.079335    0.766502    11.00000   -1.20000
AFIX   0
C29   1   -0.214880   -0.038575    0.717948    11.00000    0.03799    0.04649 =
         0.04352    0.00835    0.00554   -0.00707
C30   1   -0.224061    0.005064    0.680945    11.00000    0.04108    0.03085 =
         0.04135    0.00332   -0.00196   -0.00066
AFIX  43
H30   2   -0.276561    0.007673    0.664879    11.00000   -1.20000
AFIX   0
C31   1    0.259027   -0.002140    0.581078    11.00000    0.06766    0.04575 =
         0.05834   -0.00370   -0.00066    0.01777
C32   1    0.208721   -0.005122    0.539086    11.00000    0.06977    0.03262 =
         0.03594   -0.01492    0.01440    0.00917
C33   1    0.123318   -0.021361    0.539538    11.00000    0.06314    0.06555 =
         0.03731   -0.03015   -0.00617    0.01284
AFIX  43
H33   2    0.092515   -0.025677    0.511415    11.00000   -1.20000
AFIX   0
C34   1    0.081830   -0.031490    0.580886    11.00000    0.08464    0.03736 =
         0.03822   -0.00262   -0.00060    0.01484
C35   1    0.132955   -0.028245    0.624088    11.00000    0.07624    0.03171 =
         0.03679   -0.01286   -0.00329    0.00665
AFIX  43
H35   2    0.107078   -0.036497    0.652363    11.00000   -1.20000
AFIX   0
C36   1    0.219267   -0.013089    0.623596    11.00000    0.06085    0.04415 =
         0.04953   -0.01502    0.00069   -0.01048
C37   1    0.260384   -0.008428    0.669010    11.00000    0.06739    0.05008 =
         0.04502   -0.02782   -0.00712    0.01567
AFIX  43
H37   2    0.229263   -0.014229    0.695864    11.00000   -1.20000
AFIX   0
C38   1    0.459636   -0.000632    0.726529    11.00000    0.06224    0.05745 =
         0.05137   -0.01784   -0.00258    0.02092
AFIX  23
H38A  2    0.491092    0.036519    0.709943    11.00000   -1.20000
H38B  2    0.476405   -0.048334    0.714881    11.00000   -1.20000
AFIX   0
C39   1    0.481571    0.004115    0.776625    11.00000    0.06713    0.05722 =
         0.06082   -0.01002    0.01655    0.01652
AFIX  23
H39A  2    0.442373   -0.026982    0.793205    11.00000   -1.20000
H39B  2    0.538629   -0.015770    0.781812    11.00000   -1.20000
AFIX   0
C40   1    0.369386    0.090088    0.843855    11.00000    0.04691    0.03366 =
         0.03923    0.00273   -0.01163   -0.00170
AFIX  43
H40   2    0.409659    0.070745    0.865001    11.00000   -1.20000
AFIX   0
C41   1    0.287146    0.104501    0.860692    11.00000    0.04747    0.03600 =
         0.03114    0.00655   -0.00395   -0.00498
C42   1    0.271650    0.100029    0.910810    11.00000    0.06141    0.04056 =
         0.04184   -0.00653   -0.01186   -0.00300
C43   1    0.342313    0.094173    0.941927    11.00000    0.04703    0.05408 =
         0.03375    0.00554   -0.01702   -0.00337
AFIX  43
H43   2    0.397572    0.092897    0.930861    11.00000   -1.20000
AFIX   0
C44   1    0.328108    0.090128    0.991623    11.00000    0.06298    0.06012 =
         0.03389    0.00152   -0.00935   -0.00822
AFIX  43
H44   2    0.374160    0.086062    1.012773    11.00000   -1.20000
AFIX   0
C45   1    0.247286    0.092337    1.006772    11.00000    0.06598    0.05510 =
         0.03583    0.02863   -0.01426   -0.00818
AFIX  43
H45   2    0.238430    0.090497    1.038654    11.00000   -1.20000
AFIX   0
C46   1    0.178004    0.097203    0.976608    11.00000    0.06192    0.05349 =
         0.02657    0.00703   -0.01197   -0.01604
AFIX  43
H46   2    0.123236    0.096545    0.988351    11.00000   -1.20000
AFIX   0
C47   1    0.188031    0.103250    0.927647    11.00000    0.05527    0.04950 =
         0.03777    0.01062   -0.00564   -0.01053
C48   1    0.116820    0.114986    0.893916    11.00000    0.05459    0.04407 =
         0.03394    0.00009   -0.00235   -0.00874
C49   1    0.132315    0.122986    0.846947    11.00000    0.03790    0.04210 =
         0.03353   -0.00043    0.00100   -0.00474
C50   1    0.217735    0.122529    0.829626    11.00000    0.04471    0.04583 =
         0.03696    0.01304    0.00033   -0.01041
C51   1    0.028798    0.113206    0.910198    11.00000    0.05021    0.02581 =
         0.04111    0.00317    0.00606    0.00496
AFIX  43
H51   2    0.020717    0.106020    0.941849    11.00000   -1.20000
AFIX   0
C52   1   -0.145695    0.047931    0.913081    11.00000    0.04436    0.04544 =
         0.04213    0.01436    0.01766    0.00251
AFIX  23
H52A  2   -0.199571    0.049062    0.928940    11.00000   -1.20000
H52B  2   -0.105522    0.018858    0.931751    11.00000   -1.20000
AFIX   0
C53   1   -0.159448    0.011593    0.864468    11.00000    0.03777    0.05634 =
         0.05097    0.00743    0.01450   -0.01210
AFIX  23
H53A  2   -0.104193    0.005535    0.850492    11.00000   -1.20000
H53B  2   -0.183529   -0.036940    0.868694    11.00000   -1.20000
AFIX   0
C54   1   -0.221380    0.130724    0.774311    11.00000    0.03773    0.04929 =
         0.03489   -0.01284    0.00355   -0.00096
AFIX  43
H54   2   -0.276975    0.112520    0.772959    11.00000   -1.20000
AFIX   0
C55   1   -0.198996    0.185506    0.740090    11.00000    0.04244    0.04049 =
         0.03542   -0.00371   -0.00609   -0.00424
C56   1   -0.115222    0.207972    0.733877    11.00000    0.04081    0.04325 =
         0.02984   -0.00770   -0.00258   -0.00478
C57   1   -0.104163    0.261933    0.699579    11.00000    0.03692    0.03232 =
         0.03596    0.00497    0.00299   -0.00334
C58   1   -0.169043    0.286379    0.670314    11.00000    0.04768    0.03806 =
         0.03824    0.00137   -0.01091   -0.00208
AFIX  43
H58   2   -0.158191    0.320017    0.646842    11.00000   -1.20000
AFIX   0
C59   1   -0.253281    0.259332    0.676520    11.00000    0.03918    0.04624 =
         0.02950    0.00256   -0.01546    0.00414
C60   1   -0.266398    0.207819    0.711639    11.00000    0.02541    0.05780 =
         0.03988   -0.00174   -0.00685    0.00299
AFIX  43
H60   2   -0.320753    0.188617    0.715769    11.00000   -1.20000
AFIX   0

C61   1    0.287524    0.902331    0.941584    11.00000    0.05888    0.04235 =
         0.03282    0.00922   -0.00262    0.01351
C62   1    0.204410    0.910572    0.952815    11.00000    0.05728    0.04099 =
         0.04257    0.01070   -0.00348    0.00058
AFIX  43
H62   2    0.189983    0.913730    0.983953    11.00000   -1.20000
AFIX   0
C63   1    0.143315    0.914164    0.919403    11.00000    0.03908    0.04264 =
         0.03982   -0.00144    0.00993   -0.01053
C64   1    0.160497    0.911777    0.873307    11.00000    0.04246    0.04616 =
         0.03736   -0.00891   -0.00679    0.00482
AFIX  43
H64   2    0.116716    0.915288    0.850722    11.00000   -1.20000
AFIX   0
C65   1    0.245871    0.903888    0.860638    11.00000    0.03913    0.03637 =
         0.03243   -0.01041   -0.00383    0.00640
C66   1    0.314542    0.904279    0.892266    11.00000    0.04003    0.04685 =
         0.04064   -0.00915   -0.00298   -0.00534

CU1   4    0.007494    0.135986    0.621316    11.00000    0.03751    0.03579 =
         0.03516    0.00587   -0.00594    0.00307
CU2   4    0.328697    0.145248    0.751057    11.00000    0.03265    0.03922 =
         0.03788    0.00650   -0.00515    0.00234
CU3   4   -0.048191    0.137419    0.817951    11.00000    0.03633    0.03764 =
         0.03685    0.00553    0.00420    0.00240
N1    5    0.328927    0.295219    0.825053    11.00000    0.05615    0.04645 =
         0.05168   -0.01747    0.00183   -0.01033
N2    5    0.419749    0.186857    0.713594    11.00000    0.03051    0.04319 =
         0.04094    0.00150   -0.00696   -0.00195
N3    5    0.047060    0.162832    0.560946    11.00000    0.04740    0.03655 =
         0.02703    0.00160   -0.00753    0.00355
N4    5   -0.117471    0.138926    0.609060    11.00000    0.04678    0.04391 =
         0.03538    0.00608   -0.01305    0.00240
N5    5    0.341693    0.004029    0.671515    11.00000    0.07131    0.05230 =
         0.04333   -0.01409   -0.00483    0.01339
N6    5    0.394533    0.101461    0.800952    11.00000    0.04371    0.03908 =
         0.02745    0.00719   -0.01091    0.00704
N7    5   -0.034877    0.120668    0.884402    11.00000    0.04230    0.03992 =
         0.03879    0.00636    0.00662    0.00111
N8    5   -0.168984    0.104818    0.807134    11.00000    0.03667    0.03995 =
         0.03202    0.01010    0.00992   -0.00703
N9    5    0.259854    0.898150    0.810712    11.00000    0.05427    0.05532 =
         0.02769   -0.00733   -0.00769    0.01589
N10   5    0.051480    0.921045    0.931732    11.00000    0.04595    0.05887 =
         0.04656   -0.00261    0.01435    0.00577
N11   5    0.349993    0.891811    0.978669    11.00000    0.04900    0.04851 =
         0.04140   -0.00658   -0.01450    0.01784
NA1   6    0.103054    0.146732    0.730723    11.00000    0.04038    0.04928 =
         0.03458    0.00621    0.00112   -0.00593
O1    7    0.296793    0.298423    0.914855    11.00000    0.04943    0.06019 =
         0.04047    0.00197   -0.01277   -0.01233
AFIX   3
H1    2    0.331163    0.300943    0.887755    11.00000   -1.50000
AFIX   0
O2    7    0.373891    0.288692    0.784578    11.00000    0.05452    0.06611 =
         0.03987    0.00463    0.00793    0.00558
O3    7    0.504647    0.200601    0.733616    11.00000    0.03937    0.05757 =
         0.03752   -0.00784   -0.01140   -0.00566
O4    7    0.250240    0.165652    0.701187    11.00000    0.03344    0.05696 =
         0.03247    0.01191   -0.00755    0.00402
O5    7    0.117646    0.156053    0.647058    11.00000    0.03559    0.05015 =
         0.03039    0.00288   -0.00686   -0.00321
O6    7   -0.009873    0.153065    0.521851    11.00000    0.05294    0.06895 =
         0.04032   -0.00680   -0.01330    0.00210
O7    7   -0.161500    0.182335    0.575245    11.00000    0.04612    0.05831 =
         0.04560    0.02548   -0.00731    0.00799
O8    7   -0.008112    0.080883    0.676669    11.00000    0.04628    0.03904 =
         0.03622    0.00345   -0.00679   -0.00355
O9    7    0.342293    0.014240    0.580037    11.00000    0.06250    0.06596 =
         0.05155   -0.00845   -0.00238   -0.01487
AFIX   3
H9    2    0.362693    0.013240    0.606727    11.00000   -1.50000
AFIX   0
O10   7    0.370118    0.009687    0.717861    11.00000    0.07050    0.05497 =
         0.04972   -0.02166   -0.01285   -0.00076
O11   7    0.479409    0.074663    0.796321    11.00000    0.03981    0.05796 =
         0.03579   -0.00418   -0.01024    0.00445
O12   7   -0.113610    0.120987    0.908848    11.00000    0.04549    0.04827 =
         0.03084    0.00745    0.01587    0.00718
O13   7   -0.213887    0.051617    0.833053    11.00000    0.05050    0.05067 =
         0.04724    0.00977    0.00777   -0.01152
O14   7    0.227380    0.132960    0.785709    11.00000    0.03638    0.05102 =
         0.03664    0.00717   -0.00301   -0.00455
O15   7    0.072362    0.138424    0.814138    11.00000    0.03434    0.04866 =
         0.03405   -0.00666    0.00179   -0.00569
O16   7   -0.049051    0.186110    0.759354    11.00000    0.03365    0.03641 =
         0.03420    0.00549    0.00001   -0.00685

O17   7   -0.003550    0.912692    0.900812    11.00000    0.04618    0.04940 =
         0.05658    0.00510    0.00993    0.01273
O18   7    0.036619    0.930336    0.972299    11.00000    0.05128    0.05342 =
         0.04976   -0.01644    0.01915    0.01030
O19   7    0.326201    0.894957    1.018901    11.00000    0.05889    0.05920 =
         0.03447    0.00424   -0.01891    0.01204
O20   7    0.420366    0.876490    0.971896    11.00000    0.05008    0.08020 =
         0.05309    0.01684   -0.00361    0.02371
O21   7    0.329117    0.911428    0.799928    11.00000    0.05190    0.16803 =
         0.07876    0.02532   -0.01170    0.01174
O22   7    0.207027    0.880587    0.789579    11.00000    0.05884    0.11513 =
         0.05687   -0.00273   -0.00948    0.00037
O23   7    0.391788    0.909320    0.880807    11.00000    0.03926    0.05470 =
         0.04606   -0.01382   -0.00615    0.01119
HKLF 4

REM  in P21/n
REM R1 =  0.0568 for   12034 Fo > 4sig(Fo)  and  0.0947 for all   18150 data
REM   1009 parameters refined using      7 restraints

END

WGHT      0.0628      7.5308

REM Highest difference peak  1.434,  deepest hole -0.846,  1-sigma level  0.095
Q1    1   0.2227  0.9454  0.7837  11.00000  0.05    1.43
Q2    1   0.3121  0.8394  0.8005  11.00000  0.05    1.19
;
_shelx_res_checksum                28279
_shelx_hkl_file
;
   2   0   0  101.96    0.21
  -2   0   0  101.01    0.25
  -2   0   0  100.23    0.67
   4   0   0  659.91    9.45
   4   0   0  667.18    9.41
  -4   0   0  666.43    9.41
  -8   0   0   33.60    1.46
   8   0   0   33.47    1.71
  -8   0   0   35.05    1.58
  10   0   0   25.30    2.62
  10   0   0   22.41    0.96
 -12   0   0   65.57    1.54
  12   0   0   65.54    2.04
  12   0   0   68.24    4.62
 -14   0   0   16.44    1.12
 -14   0   0   16.06    0.83
 -16   0   0    9.42    1.37
  16   0   0    5.59    5.00
  18   0   0   12.13    6.29
 -18   0   0   12.17    1.79
 -20   0   0    4.57    1.92
  20   0   0    6.97    6.45
  -2  -1   0  538.02    2.00
   2  -1   0  542.07    1.92
  -2  -1   0  539.06    2.12
   2  -1   0  537.43    1.87
   2   1   0  541.42    2.00
  -2   1   0  541.73    2.50
  -2   1   0  539.46    1.92
   3  -1   0 1002.42   16.24
  -3  -1   0  988.45   15.70
   3  -1   0 1005.64   15.61
  -3   1   0 1003.48   15.57
  -3   1   0 1007.08   15.61
  -4  -1   0  198.68    5.95
   4  -1   0  199.50    6.79
  -4  -1   0  194.91    6.04
   4   1   0  195.44    6.08
  -4   1   0  200.66    5.95
  -4   1   0  197.46    6.83
  -5  -1   0    3.08    1.08
  -5  -1   0    3.05    0.87
   5  -1   0    2.89    0.83
  -6  -1   0   34.72    2.33
   6  -1   0   32.85    0.79
  -6  -1   0   32.39    0.96
  -6   1   0   32.93    0.62
  -6   1   0   32.49    0.75
  -7  -1   0   30.97    2.75
  -7   1   0   31.58    0.87
  -7   1   0   30.99    1.12
   7   1   0   31.20    1.37
  -8  -1   0   25.56    0.75
   8  -1   0   25.01    0.71
  -8  -1   0   25.39    0.54
  -8  -1   0   26.31    3.00
  -8   1   0   24.42    0.42
   8   1   0   26.27    2.17
  -8   1   0   23.98    0.50
  -9  -1   0    2.00    0.62
   9  -1   0    2.00    0.75
   9  -1   0    2.00    2.37
  -9  -1   0    1.94    0.54
  -9   1   0    2.00    0.42
   9   1   0    2.97    2.25
   9   1   0    2.00    1.00
 -10  -1   0   70.68    2.25
  10  -1   0   71.04    4.54
 -10  -1   0   68.97    2.17
 -10   1   0   68.97    2.29
  10   1   0   68.21    4.25
 -11  -1   0  244.61    5.50
 -11  -1   0  244.17    5.62
  11  -1   0  245.24    7.74
  11   1   0  243.97    5.79
 -11   1   0  246.27    5.83
 -12  -1   0   58.21    1.79
 -12  -1   0   59.03    2.04
  12  -1   0   61.28    4.66
  12  -1   0   58.02    2.00
  12   1   0   58.80    2.50
 -12   1   0   58.34    2.17
 -12   1   0   59.87    1.58
  13  -1   0   54.83    4.58
 -13   1   0   55.40    0.96
  13   1   0   53.46    3.75
  13   1   0   53.52    1.87
  14  -1   0   17.58    4.50
  14   1   0   22.19    4.58
 -15  -1   0    2.39    1.08
 -15  -1   0    1.51    0.96
 -15   1   0    0.65    1.17
  15   1   0    5.34    4.46
  16  -1   0   19.55    5.50
 -16  -1   0   15.61    1.12
  16   1   0   18.45    5.16
 -17  -1   0   11.60    1.37
  17  -1   0   12.53    5.87
  17   1   0    9.69    5.29
  18   1   0    3.66    5.62
 -19  -1   0   16.70    1.71
  19   1   0   16.84    5.87
 -20  -1   0    0.83    1.96
  20   1   0    1.21    6.45
   0  -2   0   64.86    3.04
   0   2   0   65.03    2.96
   1  -2   0   78.88    2.08
  -1  -2   0   77.30    1.71
   1  -2   0   78.10    1.62
   1   2   0   77.38    1.67
  -1   2   0   78.44    2.04
   2  -2   0   83.85    0.17
  -2  -2   0   84.95    0.33
   2  -2   0   80.86    1.04
  -2  -2   0   89.14    0.42
  -2   2   0   83.55    0.17
  -2   2   0   88.11    1.00
   2   2   0   84.06    0.21
  -3  -2   0    4.96    1.42
   3  -2   0    4.90    1.00
  -3  -2   0    4.73    1.29
  -3   2   0    4.71    1.04
   3   2   0    5.01    1.29
  -3   2   0    5.32    2.29
   4  -2   0  325.05    7.04
  -4  -2   0  321.38    7.45
   4  -2   0  319.85    7.95
  -4   2   0  322.84    7.08
   4   2   0  325.35    7.41
   4   2   0  317.59    7.25
  -5  -2   0   57.11    2.12
   5  -2   0   55.85    2.54
  -5  -2   0   56.40    1.42
  -5  -2   0   57.60    1.12
  -5   2   0   56.78    1.17
   5   2   0   55.89    1.96
  -6  -2   0   97.86    2.25
   6   2   0   99.00    3.21
   6   2   0   97.88    2.54
  -6   2   0   98.53    2.29
   7  -2   0   36.44    2.33
   7  -2   0   34.50    0.54
  -7  -2   0   34.08    0.46
  -7   2   0   35.09    0.58
   7   2   0   34.75    1.71
   8  -2   0   22.57    2.79
  -8  -2   0   22.84    0.67
  -8  -2   0   23.39    1.08
  -8   2   0   22.91    0.71
   9  -2   0   12.75    1.04
   9   2   0   14.73    1.62
  10   2   0  157.03    3.25
 -10   2   0  158.55    2.91
  11  -2   0   11.77    3.71
 -11  -2   0   10.57    0.83
  11   2   0    9.39    1.67
  11   2   0   12.61    3.00
 -11   2   0   10.67    1.00
  12  -2   0  191.20    7.58
 -12   2   0  184.56    4.54
  12   2   0  185.75    5.08
  12   2   0  190.21    6.58
 -13  -2   0   52.35    1.50
  13  -2   0   53.65    4.87
 -14  -2   0   52.26    1.37
 -14   2   0   50.76    1.42
 -15  -2   0   22.21    1.37
  15  -2   0   23.93    5.41
 -15  -2   0   20.20    1.29
  15   2   0   20.39    4.50
 -16  -2   0   19.73    1.37
  16  -2   0   15.08    5.45
 -16  -2   0   19.33    1.42
  16   2   0   18.98    4.58
 -17  -2   0   11.93    1.42
  17  -2   0   12.63    5.70
  17   2   0   12.04    5.16
  18  -2   0   10.97    6.70
 -18  -2   0    7.41    1.54
 -19  -2   0    4.78    1.62
  19   2   0    5.56    5.58
 -19   2   0    4.51    1.92
 -20  -2   0    2.05    2.46
  20  -2   0    0.62    7.66
 -20   2   0    0.62    2.17
   1  -3   0  135.44    2.33
   1  -3   0  135.02    1.79
   1   3   0  137.78    1.96
   1   3   0  135.90    1.83
  -1   3   0  137.44    2.37
   2  -3   0  136.36    7.41
   2  -3   0  136.06    6.75
   2  -3   0  134.90    6.66
   2   3   0  134.08    6.87
  -2   3   0  136.88    7.41
  -3  -3   0   10.52    1.33
   3   3   0   11.34    1.29
  -3   3   0   10.16    2.29
   3   3   0   11.30    0.92
   4  -3   0  609.68   13.74
   4  -3   0  612.30   12.70
  -4  -3   0  611.66   12.95
   4   3   0  606.69   12.95
   4   3   0  601.72   12.82
   5  -3   0   57.48    3.04
   5  -3   0   57.22    1.08
  -5  -3   0   54.49    2.00
   5  -3   0   57.73    1.21
   5   3   0   56.19    1.75
   5   3   0   55.58    1.62
  -5   3   0   56.26    1.29
  -5   3   0   57.03    3.25
   6  -3   0  151.54    4.83
  -6  -3   0  149.75    5.29
   6  -3   0  150.28    6.41
  -6  -3   0  149.69    5.00
  -6  -3   0  150.07    5.75
   6   3   0  148.49    5.50
   7  -3   0  204.51    5.87
  -7  -3   0  200.03    4.46
  -7   3   0  204.43    4.21
   8  -3   0   76.53    4.41
  -8  -3   0   79.29    3.96
  -8   3   0   77.40    2.25
   8   3   0   78.60    3.33
   8   3   0   75.67    2.62
  -9  -3   0   86.17    3.66
  -9  -3   0   85.31    1.46
  -9  -3   0   84.72    1.83
  -9   3   0   84.40    1.58
   9   3   0   83.98    2.00
 -10  -3   0    7.62    0.71
  10   3   0    9.39    2.46
  11  -3   0  116.33    5.50
 -11  -3   0  113.44    2.54
 -12  -3   0    2.80    0.79
 -12  -3   0    3.28    1.25
  12   3   0    2.12    2.58
 -12   3   0    2.10    0.96
 -13  -3   0    2.30    1.33
 -13  -3   0    2.92    0.87
  13  -3   0    5.68    4.33
  13   3   0    2.30    2.96
  14  -3   0    2.45    4.62
 -14  -3   0    3.25    1.29
 -14  -3   0    3.48    0.96
 -15  -3   0    3.09    1.33
  15  -3   0    3.09    4.66
 -16  -3   0    2.05    1.33
 -16  -3   0    2.05    1.08
 -16   3   0    2.79    1.42
  17  -3   0    4.64    5.70
 -17  -3   0    4.64    1.21
 -17   3   0    4.64    1.58
  18  -3   0    1.14    6.37
 -18  -3   0    0.24    1.42
 -18   3   0    0.24    1.71
  18   3   0    1.40    4.66
 -19  -3   0    8.89    1.58
  19  -3   0   12.72    7.12
 -19   3   0    7.62    1.96
  19   3   0   10.91    5.16
   0  -4   0  158.81    1.83
   0   4   0  160.60    1.42
  -1  -4   0   14.03    0.92
   1  -4   0   15.23    0.92
  -1  -4   0   14.25    1.04
   1   4   0   14.52    0.96
  -1   4   0   14.88    1.71
  -1   4   0   15.24    0.87
   2  -4   0    0.84    1.46
  -2  -4   0    0.86    0.71
   2   4   0    0.86    0.92
   2   4   0    0.86    0.71
   3  -4   0  262.75    3.00
  -3   4   0  259.28    4.25
   3   4   0  260.63    3.16
   4  -4   0   16.75    0.79
  -4  -4   0   16.56    1.04
  -4  -4   0   16.94    1.33
   4   4   0   16.92    1.37
  -4   4   0   16.14    0.83
   5  -4   0   74.02    1.04
  -5  -4   0   74.31    1.54
  -5  -4   0   73.81    1.50
  -5   4   0   72.73    1.00
   5   4   0   73.93    1.04
   6  -4   0  143.21    3.87
   6  -4   0  144.41    2.17
   6  -4   0  143.64    1.96
  -6   4   0  143.74    2.21
   6   4   0  142.67    2.66
  -7  -4   0  125.67    3.54
  -7  -4   0  124.21    2.91
   7  -4   0  126.41    2.37
  -7   4   0  125.56    2.54
   7   4   0  127.84    2.96
   7   4   0  125.27    3.00
   8  -4   0   84.49    0.79
  -8   4   0   84.38    1.08
  -9  -4   0    7.73    1.42
   9   4   0    8.17    1.92
 -10  -4   0  153.77    2.66
  10  -4   0  155.60    5.33
 -10   4   0  157.16    2.96
  11  -4   0  325.22    8.70
  11   4   0  322.40    6.87
 -11   4   0  326.38    5.95
 -12  -4   0    3.72    1.54
  12  -4   0    3.95    3.91
  12   4   0    3.57    2.50
 -13  -4   0    1.67    1.46
  13   4   0    1.84    2.66
  14  -4   0    2.91    4.87
 -14  -4   0    4.93    1.71
 -14  -4   0    3.59    1.00
 -14   4   0    4.07    1.25
 -15  -4   0   33.02    1.29
 -15  -4   0   33.90    1.83
  15  -4   0   30.60    5.50
 -15   4   0   32.01    1.54
  15   4   0   35.74    3.75
 -16  -4   0   18.17    1.33
  16  -4   0   18.48    5.50
  16   4   0   20.66    3.91
  17  -4   0   11.56    6.08
 -17  -4   0   11.92    1.67
 -17   4   0   11.56    1.62
 -18  -4   0    9.61    1.50
 -18   4   0   10.28    1.79
 -19  -4   0    2.22    1.54
  19  -4   0    4.10    7.74
 -19   4   0    1.88    1.87
 -20  -4   0    0.00    2.33
  20  -4   0    2.27    7.79
   1  -5   0  387.30    8.16
   1  -5   0  383.36    7.62
   1   5   0  384.45    7.83
   1   5   0  385.69    7.66
   2  -5   0  247.13    8.74
  -2  -5   0  249.79    7.95
   2  -5   0  251.53    7.99
   2   5   0  251.20    8.12
   2   5   0  255.28    8.08
   3  -5   0  635.93   12.16
   3  -5   0  639.34   13.28
   3  -5   0  629.63   12.28
   3   5   0  639.41   12.49
  -4  -5   0    5.15    1.25
   4  -5   0    5.00    2.42
  -4   5   0    6.61    3.08
  -5  -5   0   79.96    2.08
   5  -5   0   80.04    1.62
  -5   5   0   81.29    1.50
   5   5   0   81.26    2.21
   6  -5   0   42.04    1.33
   6   5   0   42.39    1.21
   7  -5   0    1.32    0.54
   7   5   0    1.27    0.96
  -8  -5   0   84.25    2.00
  -8   5   0   84.17    2.12
   8   5   0   84.00    2.33
  -9  -5   0  169.96    3.66
   9  -5   0  171.46    5.54
 -10  -5   0   41.59    2.42
  10  -5   0   38.52    4.71
 -11  -5   0   37.33    2.12
 -11   5   0   37.75    1.54
 -12  -5   0    3.08    0.96
  12  -5   0    2.45    4.25
 -12   5   0    1.80    1.12
  12   5   0    4.03    2.21
  13  -5   0  121.49    6.75
 -13  -5   0  119.42    3.62
 -13  -5   0  119.53    2.87
  13   5   0  118.05    4.12
 -14  -5   0    0.90    0.96
 -14  -5   0    0.22    1.79
  14  -5   0    0.12    4.54
  14   5   0    0.12    2.42
 -15  -5   0   13.68    1.21
  15   5   0   14.02    2.96
 -16  -5   0    9.00    1.17
  16  -5   0   14.33    6.16
 -16   5   0    6.62    1.58
  16   5   0    8.79    3.00
 -17  -5   0   21.52    1.33
  17   5   0   19.44    3.50
  18  -5   0    1.63    6.62
 -18  -5   0    1.71    1.50
 -19  -5   0    3.63    1.67
   0  -6   0  662.27   12.20
   0  -6   0  657.34   12.53
   0   6   0  670.13   12.62
   0   6   0  662.95   12.20
  -1  -6   0   64.42    2.25
   1  -6   0   64.72    1.83
   1  -6   0   66.44    2.83
   1   6   0   67.20    2.04
  -1   6   0   63.60    1.87
   1   6   0   64.25    2.46
   2  -6   0   46.51    2.71
   2  -6   0   47.19    1.54
  -2  -6   0   45.69    1.67
  -2   6   0   47.78    2.91
   3  -6   0   30.99    1.42
  -3  -6   0   31.66    1.67
  -3   6   0   32.17    3.08
   3   6   0   30.82    1.25
   4  -6   0   49.26    0.87
   4  -6   0   50.92    2.37
  -4  -6   0   51.68    1.29
  -5  -6   0   23.16    1.25
   5  -6   0   22.71    0.79
  -6  -6   0   84.67    1.71
   6  -6   0   83.58    2.75
   6  -6   0   84.91    1.17
   7  -6   0   47.04    3.58
   7  -6   0   45.60    1.33
  -7  -6   0   47.35    2.08
  -7   6   0   45.48    1.33
   7   6   0   46.59    1.08
  -8  -6   0    3.85    1.54
   8  -6   0    5.54    3.00
   8  -6   0    3.43    0.37
   8  -6   0    3.68    0.75
   8   6   0    2.42    0.71
  -8   6   0    2.92    0.62
   9  -6   0   51.83    3.54
   9  -6   0   52.71    0.50
   9  -6   0   52.27    0.83
   9   6   0   52.61    1.12
 -10  -6   0   50.46    1.08
 -10   6   0   50.41    1.29
  11  -6   0  154.76    5.95
 -11  -6   0  153.01    3.54
 -11   6   0  151.07    2.91
  11   6   0  152.93    3.00
 -12  -6   0   16.59    1.00
 -12  -6   0   18.23    2.04
  12  -6   0   14.46    4.54
 -12   6   0   16.74    1.25
 -13  -6   0    7.44    1.04
 -13   6   0    7.06    1.21
  13   6   0    7.35    1.92
  14  -6   0    1.39    5.20
  14   6   0    0.31    2.12
 -14   6   0    0.38    1.29
  15  -6   0    4.67    4.75
 -15  -6   0    5.39    1.12
 -15  -6   0    6.02    2.37
 -16  -6   0    0.25    2.50
 -16  -6   0    0.34    1.17
 -16   6   0    0.25    1.62
 -17  -6   0   12.69    1.37
  18  -6   0    8.49    7.33
 -18  -6   0    5.94    1.46
 -18   6   0    5.08    1.96
 -19  -6   0    7.37    1.71
  19  -6   0    6.21    7.25
   1  -7   0  555.71   11.66
   1  -7   0  555.54   10.99
  -1  -7   0  558.06   11.24
  -1   7   0  566.56   10.99
  -2  -7   0   18.30    1.67
  -2  -7   0   18.74    1.62
   2  -7   0   18.62    1.37
  -2   7   0   17.88    2.79
   2   7   0   19.40    1.83
   3  -7   0  332.71   11.83
  -3  -7   0  332.69   10.58
  -3  -7   0  324.30   10.87
   4  -7   0  182.74    5.33
   4  -7   0  182.54    3.75
  -4  -7   0  181.84    4.04
   5  -7   0   44.72    1.50
   5  -7   0   43.88    3.12
  -5  -7   0   44.91    2.08
   6  -7   0   16.30    0.92
   6  -7   0   16.64    2.79
   7  -7   0   51.27    3.50
  -7  -7   0   52.62    1.96
   7  -7   0   50.45    1.29
   8  -7   0   14.72    1.00
  -8  -7   0   13.82    1.67
  -8   7   0   15.08    0.79
  -9  -7   0  168.50    3.96
   9   7   0  171.42    2.91
  10  -7   0    4.14    0.42
 -10  -7   0    3.74    0.79
  10  -7   0    4.76    0.75
 -10  -7   0    5.41    1.87
 -10   7   0    4.48    0.87
  10   7   0    4.00    0.83
  11  -7   0   30.85    3.96
 -11   7   0   31.37    0.92
  12  -7   0   92.49    5.12
  12   7   0   90.26    2.12
 -12   7   0   90.76    1.87
 -13  -7   0   10.67    0.96
 -13  -7   0   10.14    2.29
 -13   7   0   10.14    1.25
  14  -7   0   20.67    4.83
  14   7   0   22.69    1.87
 -15  -7   0   38.26    1.29
  15   7   0   37.56    2.29
 -16  -7   0    0.62    2.54
 -16  -7   0    2.06    1.21
  16  -7   0    3.93    6.12
 -17  -7   0    3.38    1.33
  17  -7   0    6.07    6.70
 -17   7   0    3.00    1.92
  18  -7   0    1.45    6.91
 -18  -7   0    1.45    1.46
 -19  -7   0    2.31    1.67
  19  -7   0    8.13    8.29
   0  -8   0   11.61    1.87
   0  -8   0   12.20    1.37
   0   8   0   10.34    2.17
   1  -8   0   35.04    1.25
  -1  -8   0   34.89    1.25
   1   8   0   34.89    1.96
  -2  -8   0   20.57    1.29
   2  -8   0   20.57    1.17
  -2  -8   0   21.96    1.37
  -3  -8   0   38.81    1.83
   3  -8   0   37.77    1.83
  -4  -8   0   22.20    1.62
   4  -8   0   21.71    2.75
   4  -8   0   21.50    1.17
   5  -8   0    3.83    2.83
   5  -8   0    3.73    1.08
  -5  -8   0    3.98    1.46
   6  -8   0  113.86    4.96
   6  -8   0  115.09    2.79
  -6  -8   0  113.28    3.37
   7  -8   0   34.38    1.46
   7  -8   0   33.87    3.50
   8  -8   0   66.85    4.41
   8  -8   0   68.17    1.71
  -9  -8   0   11.38    1.79
  10  -8   0   19.32    4.33
 -10  -8   0   18.19    2.33
 -10  -8   0   16.84    1.00
 -10   8   0   17.01    1.12
  11  -8   0    1.80    4.04
 -11  -8   0    0.41    0.92
 -11  -8   0    0.79    2.29
 -11   8   0    0.39    1.04
  12  -8   0   26.78    4.71
 -12  -8   0   25.86    1.33
  12   8   0   27.10    1.46
 -13  -8   0   59.30    2.79
  13  -8   0   59.47    5.83
  13   8   0   58.04    1.71
 -13   8   0   57.15    1.75
 -14  -8   0   10.28    1.12
  14   8   0    9.03    1.67
 -14   8   0    9.05    1.58
  15  -8   0    0.20    5.33
 -15  -8   0    0.08    2.71
 -15  -8   0    0.08    1.12
 -15   8   0    0.08    1.50
 -16  -8   0    0.38    1.17
 -16  -8   0    1.14    2.96
  16  -8   0    0.34    5.87
 -17  -8   0    8.26    1.33
  17  -8   0   12.03    6.75
 -17  -8   0    7.10    2.91
  18  -8   0    6.94    6.87
 -18  -8   0    6.88    1.46
 -18  -8   0    6.69    3.04
 -18   8   0    7.28    2.17
  19  -8   0   16.37    8.29
   1  -9   0   31.86    2.58
   1  -9   0   32.22    1.46
  -1  -9   0   33.93    2.08
  -1   9   0   34.62    3.16
  -2  -9   0  150.74    2.75
  -2  -9   0  152.49    3.21
   2  -9   0  152.85    2.75
   2   9   0  155.34    3.58
   3  -9   0    3.72    1.21
   3  -9   0    3.96    2.62
  -3  -9   0    3.96    1.46
   4  -9   0   57.71    3.29
   4  -9   0   57.80    1.58
  -4  -9   0   57.31    1.79
  -4  -9   0   57.54    0.79
   5  -9   0   63.76    4.12
   5  -9   0   61.75    2.17
  -6  -9   0   44.14    2.37
   6  -9   0   46.07    4.12
   6  -9   0   45.53    1.92
   7  -9   0    1.91    3.66
  -7  -9   0    2.75    1.96
   8  -9   0  132.77    6.50
   8  -9   0  137.03    3.41
  -8  -9   0  137.26    4.25
   9  -9   0   44.20    1.62
  -9  -9   0   44.49    2.71
   9  -9   0   48.35    4.54
  10  -9   0    1.42    1.08
  10  -9   0    0.93    4.04
  11  -9   0    2.57    4.79
  11  -9   0    2.21    1.04
 -11  -9   0    3.58    2.50
 -12  -9   0    1.14    1.00
 -12  -9   0    3.57    2.46
  12  -9   0    0.87    4.75
 -13  -9   0    3.38    2.71
  13  -9   0    8.71    5.50
 -13  -9   0    4.69    1.12
  14  -9   0    1.70    5.58
 -14  -9   0    1.78    1.12
 -14  -9   0    2.27    2.87
 -14   9   0    0.96    1.33
 -15  -9   0    0.20    1.17
 -15  -9   0    0.15    2.91
 -15   9   0    0.20    1.46
 -16  -9   0   44.08    3.33
 -16  -9   0   46.33    1.54
  17  -9   0    1.30    6.79
 -17  -9   0    0.61    3.25
 -17   9   0    0.61    1.75
 -18  -9   0    4.88    1.58
  18  -9   0    6.54    7.87
   0 -10   0 1550.03   25.57
  -1 -10   0    9.84    2.54
  -1 -10   0   10.31    1.92
   1 -10   0   10.24    1.58
   1 -10   0   10.22    2.87
   2 -10   0  522.73    9.49
  -2 -10   0  519.74    8.49
  -2 -10   0  525.15    8.70
   3 -10   0  241.06    5.75
  -3 -10   0  236.38    4.29
   3 -10   0  237.77    4.16
  -3 -10   0  237.46    4.29
   3  10   0  239.71    4.46
  -4 -10   0    6.01    1.96
  -4 -10   0    6.88    1.42
   4 -10   0    5.66    3.54
   4  10   0    6.41    1.50
   5 -10   0   84.54    2.46
  -5 -10   0   82.47    2.91
   6 -10   0  102.00    3.04
  -7 -10   0   15.85    2.62
   7 -10   0   13.73    1.54
   8 -10   0    5.58    1.42
   9 -10   0    4.59    4.00
  -9 -10   0    6.23    2.21
   9 -10   0    5.26    1.33
  10 -10   0   28.46    1.58
  10 -10   0   24.71    4.79
 -10 -10   0   26.97    2.58
  11 -10   0    1.18    1.25
  11 -10   0    2.64    4.50
  11 -10   0    1.54    0.71
  12 -10   0   24.20    4.96
  12 -10   0   27.90    1.04
 -12 -10   0   26.87    1.17
 -12 -10   0   28.39    2.83
 -13 -10   0   12.79    1.17
 -13 -10   0   12.35    2.71
 -14 -10   0    8.64    1.33
 -14 -10   0    8.47    3.00
 -15 -10   0   13.25    1.33
 -15 -10   0   13.00    3.29
  16 -10   0    5.30    6.33
 -16 -10   0    8.69    3.58
  17 -10   0    0.26    7.08
 -17 -10   0    0.36    3.58
  18 -10   0    8.43    7.79
 -18 -10   0    4.19    3.66
 -18 -10   0    3.22    1.62
   1 -11   0  738.20   12.41
  -1 -11   0  751.18   12.16
   2 -11   0    0.50    3.08
  -2 -11   0    0.86    2.21
   2 -11   0    0.50    1.54
   3 -11   0   23.71    4.29
  -3 -11   0   23.38    2.62
   3 -11   0   22.56    2.33
  -3 -11   0   25.49    2.83
   3  11   0   24.58    2.91
   4 -11   0   91.91    3.29
  -4 -11   0   93.87    3.16
   4  11   0   94.92    3.29
   5 -11   0   28.13    3.33
   5 -11   0   26.81    1.62
  -5 -11   0   29.12    2.42
   6 -11   0    9.58    1.54
   6 -11   0    8.54    3.91
   7 -11   0   27.63    1.75
  -7 -11   0   29.14    2.58
  -8 -11   0   42.55    2.50
   8 -11   0   42.62    4.50
   8 -11   0   41.48    1.79
  -9 -11   0   36.43    3.16
   9 -11   0   34.86    2.12
  10 -11   0   39.38    1.75
  10 -11   0   36.79    5.08
 -11 -11   0    0.54    2.58
  11 -11   0    0.54    4.71
 -12 -11   0    3.48    2.75
  12 -11   0    3.48    1.21
 -13 -11   0    0.10    1.21
 -14 -11   0   12.23    1.37
  14 -11   0   14.40    6.33
 -14 -11   0    9.49    3.29
  15 -11   0    9.90    6.58
 -15 -11   0   10.56    3.46
 -15 -11   0    7.75    1.58
  16 -11   0    8.92    7.29
 -16 -11   0    7.87    3.62
  17 -11   0    0.43    7.45
 -17 -11   0    1.93    3.71
 -17 -11   0    0.43    1.54
 -18 -11   0    8.89    3.04
   0 -12   0  143.09    3.58
   0 -12   0  147.79    5.33
  -1 -12   0   20.08    3.04
   1 -12   0   22.80    2.12
  -1 -12   0   23.13    2.25
  -2 -12   0   98.84    4.08
   2 -12   0   96.97    4.91
   3 -12   0    8.92    3.50
   3 -12   0   10.84    1.92
  -3 -12   0    9.74    2.29
  -4 -12   0    8.62    2.42
  -4 -12   0   10.15    1.92
   4 -12   0   10.83    2.08
   4 -12   0   11.29    3.62
   4  12   0    9.77    2.04
   5 -12   0    8.21    4.12
   5 -12   0    8.02    1.62
  -6 -12   0   76.29    3.46
   6 -12   0   78.73    5.62
   6 -12   0   78.21    2.91
  -7 -12   0  123.30    3.41
   7 -12   0  124.17    2.62
   8 -12   0   10.64    1.83
  -8 -12   0   13.59    2.91
   8 -12   0   14.09    5.08
   9 -12   0   13.92    1.83
  -9 -12   0   14.35    2.91
  10 -12   0    2.82    4.96
  10 -12   0    3.83    1.67
 -10 -12   0    5.12    2.83
  11 -12   0   13.70    4.79
  11 -12   0   15.28    1.75
 -11 -12   0   14.84    2.83
  12 -12   0    2.65    5.29
 -12 -12   0    2.74    3.16
  12 -12   0    1.16    1.54
 -13 -12   0   22.59    1.54
 -13 -12   0   26.49    3.62
  14 -12   0   15.03    6.16
 -14 -12   0   15.60    3.66
 -15 -12   0    2.01    1.46
 -15 -12   0    5.69    3.79
  16 -12   0    4.52    7.04
 -16 -12   0    2.33    1.62
 -16 -12   0    4.37    3.96
  17 -12   0    2.60    6.95
 -17 -12   0    4.39    1.58
 -17 -12   0    2.60    4.04
   1 -13   0   19.73    1.83
  -1 -13   0   19.94    3.33
   1 -13   0   19.52    3.54
   2 -13   0   95.19    5.20
  -2 -13   0   92.28    3.46
  -2 -13   0   96.79    4.37
  -3 -13   0  117.86    4.04
   3 -13   0  116.64    3.50
   3  13   0  118.18    4.87
   4 -13   0    1.14    4.12
  -4 -13   0    1.14    2.37
  -4 -13   0    1.14    2.00
   4 -13   0    1.14    1.67
   4  13   0    1.36    2.12
   5 -13   0    0.13    3.96
  -5 -13   0    0.59    2.42
   6 -13   0   36.11    4.37
   6 -13   0   36.42    2.08
  -6 -13   0   37.07    2.66
   7 -13   0   11.87    1.92
  -7 -13   0   11.77    2.46
   8 -13   0    6.04    1.75
   8 -13   0    6.04    4.37
  -8 -13   0    7.51    2.79
   9 -13   0   30.09    2.33
  -9 -13   0   29.63    3.29
  10 -13   0   16.27    1.96
  10 -13   0   20.17    5.20
 -10 -13   0   17.31    2.96
  11 -13   0   20.07    1.87
 -11 -13   0   21.23    3.37
  11 -13   0   19.09    5.16
  12 -13   0    0.45    1.83
 -12 -13   0    0.45    3.33
 -13 -13   0    5.78    3.50
  13 -13   0    3.72    6.41
 -14 -13   0   12.83    3.54
  14 -13   0   12.36    5.87
  15 -13   0   23.14    7.04
 -15 -13   0   22.15    4.00
 -16 -13   0    8.69    4.12
  16 -13   0   14.28    7.79
 -16 -13   0    9.70    1.83
   0 -14   0   39.86    2.91
  -1 -14   0   84.48    3.21
   1 -14   0   86.86    5.04
   1 -14   0   82.58    3.00
  -1 -14   0   85.03    4.58
   2 -14   0   58.89    5.20
  -2 -14   0   56.49    3.50
   3 -14   0   78.41    5.54
  -3 -14   0   80.42    3.87
   3 -14   0   75.49    3.08
   3  14   0   79.22    3.91
  -4 -14   0   16.14    2.75
   5 -14   0    0.13    4.54
   5 -14   0    0.13    2.04
  -5 -14   0    0.13    2.50
   6 -14   0   82.71    5.75
   6 -14   0   83.28    2.83
  -6 -14   0   88.08    4.00
   7 -14   0    3.11    1.96
   7 -14   0    2.67    5.12
  -7 -14   0    2.73    2.62
  -8 -14   0   26.03    3.33
   8 -14   0   27.32    2.17
   9 -14   0   21.92    5.75
  -9 -14   0   25.78    3.62
   9 -14   0   24.49    2.29
  10 -14   0    2.95    5.25
  10 -14   0    2.25    2.12
  11 -14   0    6.47    5.83
 -11 -14   0    2.41    3.46
 -12 -14   0   12.06    3.87
  12 -14   0    8.16    2.08
 -13 -14   0    0.60    3.54
 -13 -14   0    0.60    1.50
 -14 -14   0    0.04    3.58
 -14 -14   0    0.02    1.50
 -15 -14   0    9.82    1.67
  15 -14   0    8.38    6.87
  16 -14   0    1.32    8.08
 -16 -14   0    1.34    4.25
 -16 -14   0    1.47    1.75
  -1 -15   0    2.95    4.37
  -1 -15   0    4.32    2.62
   1 -15   0    3.75    4.41
   1 -15   0    3.73    2.46
   2 -15   0   61.09    5.95
   2 -15   0   54.83    3.29
  -2 -15   0   56.05    3.66
  -3 -15   0    3.58    3.58
  -4 -15   0   27.88    3.00
   4 -15   0   28.75    4.96
  -4 -15   0   28.47    2.83
   4 -15   0   27.61    2.54
   4  15   0   28.87    2.87
   5 -15   0    3.86    2.58
  -5 -15   0    1.27    3.00
   5 -15   0    3.44    5.08
   6 -15   0   50.88    5.37
  -7 -15   0    9.83    3.16
   7 -15   0   11.77    2.46
   8 -15   0   66.55    6.41
   8 -15   0   69.76    3.04
  -9 -15   0    5.72    3.37
   9 -15   0    4.05    5.79
  10 -15   0   15.28    2.33
 -10 -15   0   15.80    3.50
  11 -15   0   23.59    2.50
 -11 -15   0   26.22    3.71
 -12 -15   0    5.19    3.79
  12 -15   0    4.34    6.79
  12 -15   0    2.78    2.91
 -14 -15   0    0.92    1.67
 -14 -15   0    0.67    4.16
  14 -15   0    0.67    7.04
  15 -15   0    9.55    7.54
 -15 -15   0    7.65    4.62
   0 -16   0    7.98    5.20
   0 -16   0    9.75    2.83
  -1 -16   0    0.27    5.00
   1 -16   0    1.16    5.37
  -1 -16   0    0.50    2.71
   1 -16   0    3.50    2.62
   2 -16   0   43.29    3.08
  -2 -16   0   41.89    4.96
  -2 -16   0   41.18    3.33
   2 -16   0   39.56    6.50
   3 -16   0   28.64    5.62
   3 -16   0   27.61    2.79
  -3 -16   0   25.37    3.00
  -3 -16   0   26.43    4.08
   4 -16   0   12.17    6.37
  -4 -16   0    9.10    3.16
  -4 -16   0    8.72    3.12
   4 -16   0    7.58    2.71
  -5 -16   0  118.42    3.08
  -5 -16   0  122.26    5.04
   5 -16   0  120.05    4.08
   5 -16   0  124.03    7.95
  -6 -16   0   17.12    3.46
   6 -16   0   16.87    6.08
   7 -16   0   22.57    6.00
   7 -16   0   20.27    2.42
  -8 -16   0    6.73    3.54
   8 -16   0    8.21    6.33
  -9 -16   0    4.24    3.66
   9 -16   0    4.41    6.04
   9 -16   0    5.44    3.12
  10 -16   0    0.43    2.71
 -10 -16   0    0.43    3.87
  11 -16   0   48.43    2.66
  11 -16   0   48.91    7.00
  12 -16   0    0.65    7.12
 -12 -16   0    3.00    4.46
 -13 -16   0   11.11    4.33
  13 -16   0   12.88    7.54
 -14 -16   0    5.75    1.71
 -15 -16   0    7.22    3.04
  -1 -17   0    0.66    3.37
  -2 -17   0    5.00    2.91
   2 -17   0    6.62    6.25
   2 -17   0    5.00    2.62
   3 -17   0   11.87    6.41
  -3 -17   0    9.93    4.37
   3 -17   0    9.89    2.87
   4 -17   0   77.66    7.08
  -4 -17   0   73.93    3.66
  -4 -17   0   76.56    3.96
   5 -17   0   55.60    7.00
   5 -17   0   52.86    3.21
  -5 -17   0   52.00    2.17
   6 -17   0    7.36    2.71
  -6 -17   0   10.13    3.58
   6 -17   0    6.21    6.12
  -7 -17   0    5.95    3.91
   7 -17   0    8.44    6.79
   8 -17   0    8.78    2.87
   8 -17   0    7.64    6.25
   9 -17   0    2.84    2.75
   9 -17   0    2.84    5.62
  -9 -17   0    5.88    3.75
  10 -17   0   12.46    3.00
  10 -17   0   13.60    7.08
 -10 -17   0    9.90    4.16
  11 -17   0   13.13    3.29
  11 -17   0   16.72    8.08
  12 -17   0    4.92    7.12
 -12 -17   0    5.97    4.41
  13 -17   0    7.64    7.74
 -14 -17   0    1.96    1.96
 -14 -17   0    3.56    4.91
   0 -18   0  192.80    5.29
   1 -18   0    7.26    3.08
  -1 -18   0    6.07    3.25
   2 -18   0   14.79    3.37
  -2 -18   0   17.64    3.96
   3 -18   0    1.75    7.16
  -3 -18   0    2.59    3.33
  -4 -18   0    1.76    3.62
   4 -18   0    3.34    3.04
  -4 -18   0    1.76    3.54
  -5 -18   0    7.68    3.29
   5 -18   0    8.40    3.16
   6 -18   0   25.33    3.41
  -6 -18   0   23.66    4.29
  -7 -18   0   34.53    3.91
   7 -18   0   34.76    3.16
   8 -18   0    1.18    3.12
  -8 -18   0    1.16    3.71
   8 -18   0    3.46    7.50
   9 -18   0    0.16    3.21
  -9 -18   0    0.22    4.00
   9 -18   0    0.22    7.37
  10 -18   0    4.48    3.21
  10 -18   0    8.36    7.70
 -10 -18   0    3.66    4.75
  11 -18   0    2.63    3.08
  11 -18   0    2.63    7.79
 -11 -18   0    2.63    4.25
 -12 -18   0   15.32    4.91
  13 -18   0    5.05    9.74
   1 -19   0    6.35    3.54
   1 -19   0    8.37    8.95
  -1 -19   0    6.29    3.66
  -2 -19   0    1.45    3.66
   2 -19   0    0.78    8.49
   2 -19   0    1.35    3.37
  -3 -19   0   16.19    3.96
   3 -19   0   13.10    3.25
  -3 -19   0   15.27    5.66
  -4 -19   0    0.02    3.66
   4 -19   0    0.02    3.21
  -5 -19   0   19.20    4.00
   5 -19   0   18.67    3.37
  -6 -19   0    4.86    4.16
   6 -19   0    3.71    7.95
   6 -19   0    3.71    3.29
  -7 -19   0    0.97    4.08
   8 -19   0    0.51    3.50
   8 -19   0    3.97    8.04
  -9 -19   0    6.56    4.79
   9 -19   0    7.74    7.83
  10 -19   0   24.81    3.62
  10 -19   0   24.60    7.79
  11 -19   0    4.42    9.08
 -11 -19   0    3.84    5.41
  12 -19   0    4.35    9.08
   0 -20   0   74.08    4.00
   1 -20   0    4.73    3.62
  -1 -20   0    1.34    3.71
  -1 -20   0    1.05    8.74
   2 -20   0   17.03    9.70
   2 -20   0   14.96    3.54
  -2 -20   0   22.59    7.08
  -2 -20   0   18.78    4.00
   3 -20   0    3.19    3.41
  -3 -20   0    0.37    6.66
  -3 -20   0    2.83    4.16
   3 -20   0    5.46    9.24
   4 -20   0    1.44    3.54
  -4 -20   0    1.63    4.12
   4 -20   0    1.65    9.70
  -5 -20   0    0.05    4.00
   6 -20   0   36.33    3.58
  -7 -20   0    0.53    4.83
   7 -20   0    2.38    3.79
   8 -20   0    2.50    8.91
  -8 -20   0    0.58    4.54
   9 -20   0    1.50    9.41
  -9 -20   0    1.52    5.04
 -10 -20   0    4.30    4.91
  10 -20   0    4.30    3.79
  -1 -21   0    4.03    4.04
  -1 -21   0    8.01    9.33
  -2 -21   0    3.84    7.70
   2 -21   0    3.84   10.53
   3 -21   0   18.57   10.74
   3 -21   0   19.98    4.16
   5 -21   0    6.33    4.04
   5 -21   0    4.39   11.16
   6 -21   0    0.23    3.83
   7 -21   0    1.30    4.08
   8 -21   0    4.55    3.96
   8 -21   0    4.55   10.53
  -9 -21   0    1.76    8.83
   0 -22   0   10.34    4.46
   0 -22   0    8.00   10.62
  -1 -22   0    7.72    4.54
  -2 -22   0    0.23    4.46
   2 -22   0    0.21    4.08
   3 -22   0    3.29   11.99
   3 -22   0    3.29    4.04
  -3 -22   0    3.29    4.37
  -4 -22   0    0.22    4.66
   5 -22   0    0.02   11.62
  -5 -22   0    0.02    4.71
   5 -22   0    1.13    4.21
  -6 -22   0    0.26    4.75
   7 -22   0   11.72   12.70
   1 -23   0    4.81   11.70
   1 -23   0    4.81    4.54
  -3 -23   0    6.17    5.33
   3 -23   0    0.08   12.91
   3 -23   0    2.10    4.46
   4 -23   0    3.11    4.16
 -19   0   1   17.08    1.75
  19   0  -1   21.21    6.20
 -17   0   1    0.77    1.46
  17   0  -1    0.49    5.33
  15   0  -1    3.10    4.46
 -15   0   1    4.07    0.62
 -13   0   1   32.26    1.54
  13   0  -1   32.73    4.96
 -13   0   1   31.08    2.21
 -11   0   1  193.05    4.58
   9   0  -1  630.66   17.57
   9   0  -1  612.31   16.16
   7   0  -1  150.00    2.04
  -7   0   1  147.90    3.87
   7   0  -1  150.91    3.62
  -5   0   1    9.18    0.46
   5   0  -1    9.14    1.50
  -5   0   1    6.38    1.54
   5   0  -1    9.47    0.54
  -5   0   1    8.63    0.33
   5   0  -1    8.06    0.33
  -3   0   1  754.99    4.08
   3   0  -1  752.71    3.50
  -3   0   1  760.21    3.50
   3   0  -1  751.05    4.04
   3   0   1  577.54   12.87
  -3   0  -1  573.79   12.87
  -5   0  -1    8.63    0.54
  -5   0  -1    8.56    1.87
   5   0   1    8.59    1.71
  -5   0  -1    8.82    0.46
   5   0   1    8.18    0.42
   7   0   1  508.97    9.16
  -7   0  -1  514.19    9.54
  -9   0  -1    4.72    0.54
  -9   0  -1    4.36    0.54
   9   0   1    2.61    2.42
  11   0   1    0.67    1.21
 -11   0  -1    0.31    0.75
  11   0   1    1.36    2.96
  13   0   1  158.24    6.66
 -13   0  -1  162.52    3.62
 -15   0  -1    2.82    0.87
  15   0   1    4.85    4.62
  17   0   1    0.22    5.58
 -17   0  -1    0.22    1.37
  20  -1  -1   10.63    6.87
 -20  -1   1    6.21    1.92
  19  -1  -1    0.46    6.16
 -19  -1   1    0.46    1.67
 -19   1   1    0.46    1.71
  19   1  -1    0.46    5.79
  18   1  -1    5.80    5.45
 -17  -1   1    2.06    1.29
  17   1  -1    2.06    5.08
 -16  -1   1   17.91    1.12
  16  -1  -1   20.99    5.66
  16   1  -1   21.16    5.12
  15  -1  -1   27.44    5.29
 -15  -1   1   25.67    1.62
 -15  -1   1   24.26    1.46
  14  -1  -1   41.33    4.71
 -14  -1   1   39.09    1.21
 -14   1   1   39.03    1.33
  14   1  -1   39.62    4.37
  13  -1  -1    5.60    4.62
  13   1  -1    3.34    3.50
 -12  -1   1   32.16    1.25
 -12  -1   1   32.84    1.21
  12  -1  -1   30.42    3.79
  12   1  -1   35.24    3.87
 -12   1   1   33.30    0.92
 -11  -1   1   23.18    0.87
 -11  -1   1   21.99    0.83
  11  -1  -1   22.16    3.25
  11   1  -1   22.04    1.37
 -11   1   1   22.82    0.54
 -11   1   1   21.03    0.96
  10  -1  -1    1.61    0.75
 -10  -1   1    0.89    0.75
 -10  -1   1    1.06    0.62
  10   1  -1    1.31    1.17
  10   1  -1    3.02    2.66
   9  -1  -1   42.74    3.54
   9  -1  -1   42.50    1.42
  -9  -1   1   42.80    1.50
  -8  -1   1   20.33    3.08
   8  -1  -1   20.25    1.04
  -8  -1   1   20.31    1.12
  -8   1   1   19.85    1.17
  -8   1   1   19.16    0.83
   7  -1  -1   34.80    1.00
   7  -1  -1   35.14    2.79
  -7  -1   1   35.12    1.25
  -7   1   1   34.40    0.83
   7   1  -1   34.78    2.46
   7   1  -1   35.03    1.33
  -7   1   1   35.20    1.12
  -6  -1   1   10.02    0.42
  -6  -1   1   10.09    0.67
  -6   1   1   10.70    0.46
   6   1  -1   10.97    0.71
  -6   1   1   10.36    0.29
   6   1  -1   10.57    1.54
  -5  -1   1  358.38    6.79
  -5  -1   1  356.69    5.95
   5  -1  -1  359.03    7.00
   5  -1  -1  356.38    5.95
  -5   1   1  357.41    6.00
   5   1  -1  354.21    6.08
   5   1  -1  358.29    6.70
   4  -1  -1  452.62   14.49
  -4  -1   1  440.78   14.49
  -4   1   1  450.32   14.49
  -4   1   1  448.98   15.32
  -3  -1   1    1.77    0.62
   3  -1  -1    1.60    1.46
  -3  -1   1    1.70    1.00
   3   1  -1    1.73    0.96
   2  -1  -1  390.96    2.62
  -2  -1   1  394.81    2.29
   2   1  -1  393.10    2.17
   2   1  -1  393.84    2.25
   2  -1   1  345.58    4.04
  -2  -1  -1  342.36    3.71
  -2  -1  -1  340.19    3.50
   2   1   1  342.66    3.58
  -2   1  -1  346.87    4.04
  -2   1  -1  345.84    3.50
  -3  -1  -1  871.44   24.86
   3  -1   1  873.05   24.48
   3  -1   1  871.28   24.48
   3  -1   1  858.21   25.07
   3   1   1  874.23   24.82
  -3   1  -1  874.90   24.48
   4  -1   1  139.86    2.66
   4   1   1  138.58    1.67
   5  -1   1  450.40   10.12
   5  -1   1  451.71    9.16
  -5  -1  -1  452.17    9.16
   5   1   1  449.64    9.87
   5   1   1  449.45    9.33
  -6  -1  -1  121.36    1.21
   6  -1   1  120.66    2.75
   6   1   1  120.85    1.50
   6   1   1  122.39    2.54
  -7  -1  -1  257.25    6.54
   7  -1   1  258.83    6.62
   7  -1   1  251.35    5.12
   7   1   1  257.06    6.33
  -7   1  -1  257.55    5.12
  -8  -1  -1  267.55    4.54
   8  -1   1  263.39    6.12
  -8   1  -1  266.77    4.58
   9  -1   1  206.76    5.41
   9   1   1  207.33    5.08
  -9   1  -1  210.58    3.50
 -10  -1  -1    0.43    0.67
  10  -1   1    1.41    2.96
 -10  -1  -1    0.49    0.75
 -10   1  -1    0.47    0.71
  10   1   1    0.61    1.21
 -11  -1  -1   35.56    1.71
  11  -1   1   35.73    4.25
 -11  -1  -1   36.66    1.54
  11  -1   1   36.36    1.67
 -11   1  -1   36.95    1.33
  11   1   1   37.46    2.08
  12  -1   1    2.37    1.12
 -12  -1  -1    2.85    0.83
  12  -1   1    3.08    3.37
 -12  -1  -1    2.60    0.83
  12   1   1    2.70    3.37
  12   1   1    3.38    1.58
 -13  -1  -1   31.18    1.33
  13  -1   1   30.93    1.58
  13  -1   1   28.51    4.66
 -13   1  -1   29.50    1.17
  14  -1   1   25.73    4.54
 -14  -1  -1   26.70    1.25
  14  -1   1   26.91    1.58
 -14   1  -1   26.28    1.04
  14   1   1   24.30    2.21
 -14   1  -1   24.24    1.42
  15  -1   1   94.03    6.66
  15   1   1   95.32    6.33
 -16  -1  -1    0.85    1.21
  16  -1   1    3.66    5.50
 -16   1  -1    0.64    1.25
 -17  -1  -1   18.74    1.62
  17   1   1   18.82    5.58
 -18  -1  -1    1.84    1.54
  18   1   1    1.84    5.83
 -18   1  -1    1.86    1.50
  19  -1   1    6.99    6.70
  19   1   1    3.62    6.33
 -20  -1  -1    1.98    1.96
  20  -1   1    1.98    7.33
  20   1   1    2.54    6.50
 -20   1  -1    1.98    2.25
 -20  -2   1    1.80    2.08
 -20   2   1    0.12    2.12
  19  -2  -1    8.28    6.91
 -19  -2   1    5.82    1.62
 -19   2   1    4.66    1.87
  19   2  -1    7.69    5.29
 -18  -2   1   42.09    1.75
  18   2  -1   44.11    5.37
 -18   2   1   40.91    2.00
 -17  -2   1   46.45    1.71
  17  -2  -1   50.64    6.45
 -17   2   1   44.99    1.83
  16  -2  -1    0.58    5.00
 -16  -2   1    1.14    1.17
 -16  -2   1    0.93    1.12
 -16   2   1    0.58    1.33
 -15  -2   1    1.64    1.12
 -15   2   1    2.30    1.29
  15   2  -1    0.65    3.87
  14  -2  -1    6.94    4.62
  14   2  -1    5.45    3.46
 -13  -2   1   17.40    0.87
 -13  -2   1   16.45    1.08
 -12  -2   1   19.60    0.79
  12  -2  -1   21.20    3.71
 -12  -2   1   20.50    1.17
  12   2  -1   20.95    3.04
 -12   2   1   19.32    0.96
  12   2  -1   19.22    1.79
 -11  -2   1   11.47    0.83
  11  -2  -1   10.75    3.33
  11   2  -1   12.71    1.71
 -10   2   1  109.25    2.21
  10   2  -1  110.51    4.04
  10   2  -1  111.19    2.54
  -9  -2   1    8.20    0.62
  -9  -2   1    8.47    0.96
   9   2  -1    8.07    2.08
   9   2  -1    8.89    1.17
  -8  -2   1    4.51    2.46
  -8  -2   1    4.76    0.46
  -8  -2   1    6.62    0.96
   8   2  -1    4.70    1.96
  -8   2   1    5.35    0.58
   7  -2  -1   30.18    2.83
  -7  -2   1   28.31    0.96
  -6  -2   1  184.79    4.75
   6  -2  -1  180.11    6.12
   6   2  -1  185.51    5.45
  -6   2   1  184.10    4.79
   5  -2  -1    2.17    1.71
  -5  -2   1    4.51    0.71
   5  -2  -1    4.19    0.25
  -5  -2   1    2.19    1.29
  -5  -2   1    4.11    0.33
  -5   2   1    3.56    0.33
  -5   2   1    4.09    1.96
   5   2  -1    3.65    1.00
   5   2  -1    3.77    0.67
   4  -2  -1   50.75    3.79
  -4  -2   1   52.39    3.29
  -4   2   1   52.22    2.79
   4   2  -1   50.50    3.16
  -4   2   1   52.73    4.08
   3  -2  -1   18.43    1.58
  -3  -2   1   18.43    1.00
   3  -2  -1   18.43    0.54
  -3  -2   1   18.43    0.87
  -3   2   1   18.43    1.83
   3   2  -1   18.45    0.92
   2  -2  -1   53.23    2.04
   2  -2  -1   52.89    1.33
  -2  -2   1   52.53    1.46
   2  -2  -1   53.99    1.25
  -2  -2   1   52.89    1.33
  -2   2   1   53.98    1.33
   2   2  -1   53.56    1.50
  -2   2   1   53.50    2.12
  -2   2   1   52.78    1.25
  -1  -2   1  255.40    2.58
   1  -2  -1  254.53    2.87
  -1   2   1  256.52    2.87
   1   2  -1  254.62    2.50
  -1   2   1  254.28    2.46
   0  -2  -1  320.65    9.49
   0   2   1  314.83    9.37
  -1  -2  -1  211.94    0.17
  -1  -2  -1  219.29    0.42
   1   2   1  219.01    0.37
   2  -2   1   19.41    2.29
  -2  -2  -1   19.64    1.62
  -2   2  -1   19.92    2.33
   2   2   1   19.75    1.67
  -3  -2  -1  487.95    6.16
   3  -2   1  484.14    6.66
  -3  -2  -1  487.06    6.04
   3   2   1  491.80    6.08
  -3   2  -1  488.62    5.87
  -4  -2  -1    5.45    0.62
  -4  -2  -1    5.74    0.25
   4  -2   1    6.52    1.54
   4   2   1    6.50    0.62
   5  -2   1   21.71    2.62
  -5  -2  -1   24.81    2.12
  -5  -2  -1   23.06    1.04
   5  -2   1   23.52    0.96
  -5   2  -1   24.75    2.91
   5   2   1   24.45    1.42
  -6   2  -1  102.68    2.58
  -6   2  -1  102.49    4.29
   6   2   1  104.00    3.54
   7  -2   1   54.61    3.12
  -7  -2  -1   54.71    1.46
   7   2   1   52.73    1.62
  -7   2  -1   53.76    0.96
   8  -2   1  169.99    5.66
   8  -2   1  166.26    3.62
  -8  -2  -1  166.73    3.83
  -8   2  -1  169.86    3.71
   8   2   1  166.05    4.00
   9  -2   1  245.60    4.54
   9  -2   1  250.17    6.70
   9   2   1  244.16    4.96
 -10  -2  -1   17.02    0.75
  10  -2   1   17.21    0.87
  10  -2   1   16.07    3.16
 -10  -2  -1   17.25    1.00
  10   2   1   16.09    1.50
  11  -2   1   42.50    1.00
 -11  -2  -1   42.12    0.83
 -11  -2  -1   42.50    1.12
  11  -2   1   38.94    3.37
 -11   2  -1   41.91    0.92
  11   2   1   40.29    2.96
  12  -2   1   35.49    4.25
  12  -2   1   34.21    1.12
 -12  -2  -1   33.56    1.08
 -12  -2  -1   33.98    1.25
  12   2   1   35.94    3.37
 -13  -2  -1    3.17    1.00
 -13   2  -1    2.79    1.12
  13   2   1    0.64    3.71
 -14  -2  -1   68.70    2.42
 -14  -2  -1   69.31    2.17
 -15  -2  -1    5.35    1.17
  15  -2   1    5.87    5.00
 -15  -2  -1    5.20    1.08
 -15   2  -1    5.20    1.12
  15   2   1    5.20    4.29
 -16  -2  -1    5.45    1.25
 -16  -2  -1    6.12    1.21
  16   2   1    6.04    4.41
 -17  -2  -1    0.09    1.25
  17  -2   1    0.51    5.95
  18  -2   1   14.81    6.58
 -18  -2  -1   13.68    1.75
  18   2   1   17.45    5.83
  19  -2   1    4.05    7.04
 -19   2  -1    1.42    1.87
  19   2   1    1.42    5.91
 -20  -2  -1    4.81    3.12
  20   2   1    4.07    6.00
  20  -3  -1    3.09    7.66
 -20   3   1    0.04    3.29
  20   3  -1    0.04    5.33
  19  -3  -1    8.36    6.87
  19   3  -1    5.37    4.87
 -18  -3   1    5.03    1.42
  18  -3  -1    5.37    6.33
 -18   3   1    3.41    1.75
  18   3  -1    3.37    4.33
 -17  -3   1    7.11    1.37
 -16  -3   1  121.36    3.29
 -16   3   1  122.11    3.62
 -15  -3   1   13.23    1.17
  15  -3  -1   10.09    5.20
 -15   3   1   12.15    1.37
 -14  -3   1    5.25    0.96
 -14  -3   1    4.96    1.29
 -14   3   1    5.27    1.17
 -13  -3   1    2.01    1.29
  13   3  -1    1.95    2.83
 -13   3   1    2.05    1.08
 -12   3   1    1.02    0.96
  12   3  -1    0.65    2.58
 -11  -3   1    0.29    0.62
 -11  -3   1    0.29    1.17
 -10  -3   1  193.73    3.91
  -9  -3   1   42.30    2.12
  -9  -3   1   44.64    3.96
  -9  -3   1   41.63    1.67
   9  -3  -1   44.89    4.33
   9   3  -1   42.58    2.33
  -8  -3   1  745.51   13.70
   8   3  -1  739.11   14.37
  -7  -3   1  260.99    6.12
  -7   3   1  265.45    6.20
   7   3  -1  262.15    6.45
   7   3  -1  265.81    6.75
   6  -3  -1   13.90    3.29
  -6  -3   1   14.83    2.71
   6   3  -1   14.49    2.12
   6   3  -1   14.91    2.29
   5  -3  -1   30.91    3.41
  -5  -3   1   31.04    2.17
   5  -3  -1   30.93    1.62
  -5  -3   1   30.89    2.42
   5   3  -1   30.62    2.12
   5   3  -1   31.79    2.17
   4  -3  -1   57.75    0.46
  -4  -3   1   58.24    0.83
  -4  -3   1   57.23    0.87
   4  -3  -1   57.79    0.33
   4   3  -1   57.98    0.58
  -4   3   1   57.35    0.33
   3  -3  -1  342.49    5.66
  -3  -3   1  342.99    4.79
   3   3  -1  342.57    4.96
   3   3  -1  337.30    4.66
   2  -3  -1   29.86    1.12
  -2  -3   1   29.86    0.62
   2  -3  -1   29.25    0.42
  -2   3   1   29.02    0.42
  -2   3   1   32.41    1.29
   2   3  -1   32.33    0.58
   1  -3  -1  171.59    1.17
   1  -3  -1  171.90    0.67
  -1  -3   1  171.48    1.08
  -1   3   1  174.41    1.21
  -1   3   1  171.14    0.67
   0  -3  -1    1.37    0.54
   0  -3   1    1.46    0.58
   0  -3  -1    1.21    0.75
   0   3   1    1.63    0.50
  -1  -3  -1  445.56    5.62
   1   3   1  449.73    5.58
   1   3   1  450.82    5.62
  -1   3  -1  454.17    6.04
   2  -3   1  162.07    2.50
  -2  -3  -1  161.02    2.75
   2  -3   1  160.43    3.50
  -2   3  -1  161.98    3.41
   2   3   1  161.56    2.75
  -3  -3  -1  228.67    8.54
   3  -3   1  228.98    8.49
  -3  -3  -1  226.41    8.74
   3   3   1  231.42    8.74
  -4  -3  -1   33.29    1.50
   4  -3   1   33.15    1.00
  -4   3  -1   33.70    1.08
   5  -3   1  129.58    2.21
   5  -3   1  129.87    3.91
  -5  -3  -1  128.06    2.25
  -5  -3  -1  129.81    2.91
  -5   3  -1  128.08    2.29
   5   3   1  129.20    2.58
   6  -3   1  232.77    7.99
  -6  -3  -1  232.79    6.45
   6   3   1  232.54    6.79
  -6   3  -1  235.53    6.50
   6   3   1  239.96    7.08
  -7  -3  -1   86.57    1.21
  -7   3  -1   86.72    1.29
  -8  -3  -1   51.95    3.16
   8  -3   1   51.07    3.83
  -8  -3  -1   49.19    1.87
   8   3   1   47.67    2.00
  -8   3  -1   50.52    1.58
   9  -3   1    9.20    2.83
   9  -3   1   10.67    0.71
  -9  -3  -1    9.85    0.62
   9   3   1   11.45    2.25
   9   3   1    9.62    1.71
 -10  -3  -1  102.29    1.62
 -10  -3  -1  102.12    2.00
  10  -3   1  100.07    1.42
  10  -3   1  102.73    4.04
 -10   3  -1   99.49    1.79
 -11  -3  -1    7.29    0.71
  11  -3   1    5.44    3.62
 -12  -3  -1    2.75    0.83
 -12  -3  -1    2.73    1.29
  12   3   1    1.17    2.91
  13  -3   1   10.82    4.66
 -13  -3  -1    7.73    1.33
  13   3   1    8.46    3.12
 -14  -3  -1    8.96    1.37
  14  -3   1   10.24    4.96
 -15  -3  -1    1.42    1.29
  15  -3   1    3.35    5.25
 -15  -3  -1    1.42    1.04
  15   3   1    1.42    3.62
 -16  -3  -1   13.19    1.29
 -16  -3  -1   15.82    1.54
  16   3   1   13.76    5.41
 -17  -3  -1    1.16    1.21
  17  -3   1    3.36    6.16
  17   3   1    3.48    4.75
  18  -3   1   19.66    7.20
 -18  -3  -1   13.36    1.46
 -18   3  -1   14.55    1.79
 -19  -3  -1    3.44    1.62
 -19   3  -1    3.27    1.75
  19   3   1    3.28    5.16
  20  -3   1    0.11    7.74
  20  -4  -1    9.41    8.16
 -19  -4   1   16.65    1.79
  19   4  -1   14.86    4.62
 -19   4   1   14.52    2.08
 -18  -4   1   10.02    1.42
  18  -4  -1   14.85    6.50
  18   4  -1    9.20    4.12
  17  -4  -1    5.25    6.16
 -17  -4   1    4.98    1.29
 -16  -4   1    7.99    1.21
 -16  -4   1    7.13    1.62
  16  -4  -1    9.17    5.45
  16   4  -1    6.92    3.41
 -15  -4   1   12.58    1.29
  15  -4  -1   13.91    5.54
 -15  -4   1   12.94    1.79
  15   4  -1   12.10    3.12
 -14  -4   1   11.61    0.96
  14   4  -1   11.73    2.91
  13  -4  -1  217.86    7.25
 -13   4   1  212.49    4.00
 -12  -4   1  214.29    5.16
  12  -4  -1  217.54    7.95
  12   4  -1  220.78    6.16
 -12   4   1  213.93    5.04
 -11  -4   1    8.43    1.50
  11  -4  -1    9.32    3.83
 -11  -4   1    9.36    0.79
 -10  -4   1    1.11    0.67
 -10  -4   1    2.29    1.46
  10   4  -1    1.60    1.92
  -9  -4   1    2.17    2.66
  -9  -4   1    0.78    0.58
   9  -4  -1    2.76    3.25
   9   4  -1    0.55    1.58
  -8  -4   1    0.25    2.12
  -8  -4   1    0.65    1.21
   8   4  -1    0.65    1.21
  -8   4   1    0.25    0.58
  -7  -4   1   87.04    2.42
   7  -4  -1   87.91    3.46
  -7   4   1   86.89    1.37
   6  -4  -1   30.32    1.71
  -6  -4   1   28.95    2.33
   6  -4  -1   31.52    4.04
  -5  -4   1   36.04    1.54
   5  -4  -1   37.66    2.71
  -5  -4   1   36.32    1.50
   5  -4  -1   34.97    0.96
   5   4  -1   35.24    1.00
  -5   4   1   35.26    1.00
   4  -4  -1  403.51    7.20
   4  -4  -1  402.73    8.37
   4  -4  -1  394.75    7.25
   4   4  -1  402.36    7.58
   4   4  -1  397.89    7.20
  -3  -4   1  472.26    8.91
   3  -4  -1  471.16    9.91
   3   4  -1  476.85    9.20
   2  -4  -1   24.08    0.62
  -2  -4   1   23.91    0.83
  -2   4   1   25.17    0.62
  -2   4   1   22.26    1.67
   2   4  -1   25.21    1.00
   2   4  -1   23.21    0.79
   1  -4  -1  329.74    5.37
  -1  -4   1  330.12    5.50
   1  -4  -1  333.41    5.87
   1   4  -1  335.48    5.45
   1   4  -1  334.49    5.79
  -1   4   1  336.34    5.37
   0  -4  -1   82.60    2.33
   0  -4   1   83.54    2.08
   0   4   1   83.61    2.42
  -1  -4  -1   61.21    3.04
  -1  -4  -1   62.56    3.04
   1   4   1   60.94    3.12
  -1   4  -1   61.71    3.71
  -2  -4  -1  201.53    4.96
   2   4   1  197.40    5.04
   2   4   1  198.67    5.25
  -3  -4  -1    5.05    0.87
   3  -4   1    4.73    0.29
   4  -4   1  108.49    3.08
  -4  -4  -1  108.99    3.50
   4  -4   1  108.51    4.62
   4   4   1  108.51    3.04
  -5  -4  -1  436.84    9.08
   5  -4   1  439.26   10.16
   5   4   1  443.54    8.83
   5   4   1  439.43    9.08
   6  -4   1   50.89    1.33
  -6  -4  -1   50.73    2.08
   6   4   1   49.25    2.25
   7   4   1  427.81    9.95
   7   4   1  434.57   10.16
  -7   4  -1  424.61    9.58
  -8  -4  -1  260.37    4.37
  -8   4  -1  264.16    4.00
  -9  -4  -1   38.25    1.33
   9  -4   1   38.42    1.00
   9  -4   1   40.80    3.66
  -9  -4  -1   39.45    1.79
  -9   4  -1   38.82    1.25
  10  -4   1   35.16    3.83
 -10  -4  -1   34.45    1.79
  10  -4   1   33.52    1.00
  11  -4   1   54.80    4.96
 -11  -4  -1   55.46    2.50
  12  -4   1   10.70    3.66
 -12  -4  -1   11.48    0.87
 -12  -4  -1   11.43    1.54
  12   4   1    8.80    2.54
  13  -4   1    0.92    4.25
 -13  -4  -1    1.79    1.46
 -13   4  -1    0.92    1.17
  13   4   1    1.70    2.79
 -14  -4  -1  221.93    4.83
  14  -4   1  222.01    8.29
 -14   4  -1  220.48    4.87
  14   4   1  222.40    6.50
  15  -4   1   23.15    5.29
 -15  -4  -1   24.16    1.67
 -15  -4  -1   25.46    1.17
  15   4   1   23.55    3.62
  16  -4   1    5.39    5.70
  16   4   1    5.75    3.83
 -17  -4  -1    1.84    1.29
  17  -4   1    3.39    6.16
 -18  -4  -1    1.82    1.33
  18   4   1    3.40    4.16
 -19  -4  -1   15.39    1.62
  19  -4   1   18.02    7.70
 -20  -4  -1    0.54    2.21
  20  -4   1    0.54    8.08
 -20   4  -1    0.54    2.46
 -19  -5   1    0.98    1.62
  19  -5  -1    4.63    7.45
 -18  -5   1    6.75    1.50
 -18   5   1    5.61    1.83
 -17  -5   1    1.68    1.83
  17  -5  -1    1.68    5.87
 -17   5   1    2.46    1.79
  16  -5  -1   12.92    5.91
 -16  -5   1   12.52    1.33
 -16  -5   1   15.76    2.04
  16   5  -1   15.41    2.96
  15  -5  -1    1.80    4.79
 -15  -5   1    3.17    2.00
 -15   5   1    1.82    1.50
 -14  -5   1   25.32    2.00
 -14  -5   1   24.48    1.12
 -14   5   1   23.30    1.37
 -13  -5   1   10.57    1.00
 -13  -5   1   10.80    1.92
 -13   5   1    8.79    1.33
 -12  -5   1    8.71    0.96
  12  -5  -1    7.38    4.12
 -12   5   1    8.05    1.21
 -11  -5   1   86.98    2.50
  11   5  -1   84.98    3.29
 -11   5   1   84.60    2.71
  10  -5  -1    0.74    3.25
 -10  -5   1    0.76    1.50
 -10   5   1    0.55    0.83
  -9  -5   1   68.73    2.21
  -9  -5   1   66.16    1.54
  -9   5   1   67.80    1.67
   9   5  -1   67.36    1.96
  -8  -5   1   95.48    2.83
  -8  -5   1   95.51    2.21
  -8   5   1   95.06    2.33
  -7  -5   1    4.12    1.25
   7  -5  -1    3.43    0.29
  -7  -5   1    2.02    1.54
   7  -5  -1    3.36    2.42
   7   5  -1    3.32    0.75
  -7   5   1    3.22    0.54
  -6  -5   1  109.97    3.25
   6  -5  -1  112.50    4.71
   6  -5  -1  108.85    2.66
   6   5  -1  110.18    2.62
   5  -5  -1    6.35    2.91
   5   5  -1    7.85    1.17
   5   5  -1    8.52    2.08
   4  -5  -1  384.19    8.74
  -4  -5   1  386.34    7.45
   4  -5  -1  387.18    7.45
   4   5  -1  387.80    7.87
  -3  -5   1  197.36    2.96
   3  -5  -1  197.72    3.91
   3  -5  -1  200.48    2.50
  -3  -5   1  197.44    2.79
  -3   5   1  201.17    4.21
   2  -5  -1 1448.41   34.85
  -2  -5   1 1452.71   34.31
   2   5  -1 1479.70   34.27
   2   5  -1 1470.28   34.35
  -1  -5   1 1796.55   35.44
  -1  -5   1 1781.21   35.31
   1  -5  -1 1781.67   35.64
   1   5  -1 1815.59   35.31
  -1   5   1 1800.23   35.23
   1   5  -1 1823.74   35.48
   0  -5  -1 6498.02  121.59
   0  -5   1 6461.55  121.63
   0   5   1 6512.56  121.38
   1  -5   1  977.86   21.69
  -1  -5  -1  981.84   21.28
   1  -5   1  981.39   21.24
   1   5   1  989.17   21.28
   2  -5   1  546.10    9.74
  -2  -5  -1  538.51    9.62
   2  -5   1  537.14   10.49
   2   5   1  544.47    9.70
   2   5   1  533.60    9.83
   3  -5   1  796.00   15.07
   3  -5   1  800.18   13.95
   3   5   1  795.58   14.32
   4  -5   1  259.66    5.29
   4  -5   1  258.69    6.50
   5  -5   1   24.16    2.12
  -5   5  -1   24.60    0.42
   5   5   1   24.16    1.37
  -6  -5  -1  138.75    2.66
   6   5   1  135.91    2.00
   7  -5   1   65.74    4.96
  -7  -5  -1   62.38    3.08
  -8  -5  -1   50.59    3.00
  -8  -5  -1   54.38    3.71
   8  -5   1   50.49    5.20
  -8  -5  -1   52.40    2.42
  -8   5  -1   52.47    2.50
   9  -5   1    5.15    0.37
  -9  -5  -1    5.74    0.62
   9  -5   1    5.01    3.04
  -9  -5  -1    5.30    1.46
  -9   5  -1    5.47    0.75
   9   5   1    5.01    1.42
  10  -5   1    6.60    0.71
  10  -5   1    4.37    3.75
 -10  -5  -1    6.31    1.54
  10  -5   1    5.80    0.50
  10   5   1    5.21    1.71
  11  -5   1  135.99    6.37
 -11  -5  -1  140.42    3.75
 -11   5  -1  139.05    3.33
  11   5   1  138.33    4.16
  12  -5   1    0.26    3.79
 -12  -5  -1    1.55    0.87
 -12  -5  -1    2.90    1.79
  12   5   1    0.70    2.29
 -12   5  -1    1.25    1.00
  13  -5   1   15.54    4.25
 -13  -5  -1   13.63    1.87
 -13  -5  -1   12.51    0.96
 -13   5  -1   12.32    1.12
  13   5   1   11.37    2.37
 -14  -5  -1    0.76    1.75
 -14  -5  -1    2.07    1.04
  14  -5   1    4.94    5.00
  14   5   1    0.11    2.66
 -15  -5  -1    2.80    1.00
  15  -5   1    2.55    5.29
  15   5   1    4.97    3.00
  16  -5   1   47.18    6.41
 -16  -5  -1   45.91    1.67
 -17  -5  -1    0.04    1.25
  17  -5   1    0.04    5.87
 -18  -5  -1    2.09    1.42
  18  -5   1    2.11    6.66
 -18   5  -1    2.11    1.83
 -19  -5  -1    3.61    1.54
  19  -5   1    5.10    8.08
 -19   5  -1    3.42    1.96
  18  -6  -1   15.47    6.83
 -18  -6   1   19.68    1.62
 -18   6   1   17.62    2.12
 -17  -6   1    0.15    2.66
  17  -6  -1    0.15    6.16
  17   6  -1    0.15    2.91
 -17   6   1    0.15    1.79
 -16  -6   1    0.73    1.12
 -16  -6   1    0.62    2.42
  15  -6  -1    1.47    4.87
 -15  -6   1    0.86    2.25
 -15  -6   1    0.86    1.04
 -15   6   1    0.86    1.33
  15   6  -1    0.86    2.21
 -14  -6   1   46.82    1.25
  14  -6  -1   49.35    5.45
 -13  -6   1   20.53    2.33
  13  -6  -1   19.48    5.16
 -13  -6   1   18.43    1.21
  13   6  -1   18.93    2.17
  12  -6  -1   99.90    5.29
 -12  -6   1  101.25    2.79
  12   6  -1   99.55    2.54
  11  -6  -1   48.12    4.46
 -11  -6   1   45.30    2.12
  11   6  -1   45.68    1.67
 -11   6   1   44.85    1.29
 -10  -6   1   34.82    0.87
 -10  -6   1   35.88    1.92
  10   6  -1   34.15    1.25
  -9  -6   1   41.42    2.33
  -9  -6   1   41.10    1.62
  -9   6   1   39.77    1.37
   9   6  -1   40.45    1.62
   8  -6  -1   16.08    0.62
   8  -6  -1   17.47    0.33
  -8  -6   1   15.03    1.37
   8  -6  -1   18.53    2.87
  -8   6   1   16.92    0.71
   7  -6  -1  273.50    8.33
   7   6  -1  277.90    6.25
  -7   6   1  275.03    6.37
  -6  -6   1  300.53    5.50
  -5  -6   1    0.86    1.17
   5  -6  -1    0.86    0.71
  -4  -6   1    5.44    1.12
   4  -6  -1    5.48    0.75
   4  -6  -1    4.11    1.87
  -4  -6   1    4.66    0.42
  -3  -6   1   26.27    0.54
   3  -6  -1   26.25    2.00
   3  -6  -1   25.51    0.46
  -3  -6   1   27.01    1.33
   3   6  -1   26.50    1.37
  -3   6   1   27.14    2.54
  -2  -6   1  390.60    6.54
   2  -6  -1  395.16    7.29
  -2   6   1  392.31    6.37
   1  -6  -1  204.01    6.50
   1  -6  -1  199.33    5.83
   1   6  -1  203.67    6.33
   1   6  -1  199.04    5.91
   0  -6  -1 3093.55   68.29
   0  -6   1 3104.08   68.37
   0   6   1 3094.96   68.00
   1  -6   1  300.13    6.25
  -1  -6  -1  304.93    6.37
   1  -6   1  300.40    6.87
  -1  -6  -1  299.79    6.25
   1   6   1  305.75    6.33
  -2  -6  -1  661.14    9.99
   2   6   1  667.19   10.08
   3  -6   1  148.72    2.50
  -3  -6  -1  148.70    2.75
  -3   6  -1  145.21    4.25
   3   6   1  148.15    2.25
   4  -6   1  125.58    5.00
  -5  -6  -1   18.93    1.46
   5  -6   1   18.87    1.08
   6  -6   1   26.79    1.25
  -6  -6  -1   29.22    1.83
   7  -6   1    2.67    0.92
  -7  -6  -1    2.44    1.00
   7  -6   1    3.52    2.91
   7   6   1    1.70    0.50
  -7   6  -1    1.43    0.58
   8  -6   1    4.23    1.12
  -8  -6  -1    5.28    1.71
  -8  -6  -1    3.89    1.71
  -8   6  -1    4.55    0.96
   8   6   1    4.04    1.00
   9  -6   1   11.58    4.16
  -9  -6  -1    9.20    1.87
   9  -6   1   10.02    0.75
  -9   6  -1   10.51    1.21
   9   6   1   10.99    1.37
 -10  -6  -1   21.43    1.92
 -10  -6  -1   20.41    0.83
  10  -6   1   21.01    0.58
  10  -6   1   20.35    0.83
 -11  -6  -1   12.83    1.83
 -11  -6  -1   13.04    0.92
  11   6   1   13.78    1.50
  12  -6   1   17.24    4.83
  12   6   1   18.67    1.92
 -13  -6  -1   52.17    1.33
 -13   6  -1   51.86    1.71
  14  -6   1   10.49    4.75
 -14  -6  -1    9.12    1.04
  14   6   1    9.96    2.29
  15  -6   1   46.41    5.91
 -15  -6  -1   43.84    1.29
 -16  -6  -1    0.08    1.12
  16   6   1    0.83    2.66
  17  -6   1    0.61    6.08
 -17  -6  -1    1.50    1.29
 -17  -6  -1    2.00    2.17
  18  -6   1   21.99    7.74
 -18  -6  -1   19.08    1.67
 -18   6  -1   17.16    2.00
  19  -6   1    7.56    7.41
 -19  -6  -1    3.81    1.54
 -19   6  -1    3.81    2.08
 -19  -7   1    0.69    1.62
  19  -7  -1    3.45    7.99
 -18  -7   1    2.45    1.42
  18  -7  -1    4.76    7.00
  17  -7  -1    0.07    6.50
 -17  -7   1    1.50    2.75
 -17  -7   1    0.07    1.37
  16  -7  -1   34.16    6.08
 -16  -7   1   35.95    1.67
 -16  -7   1   38.71    2.91
  16   7  -1   37.42    2.79
  15  -7  -1   13.10    5.29
 -15  -7   1    9.60    1.21
  15   7  -1    9.03    2.12
  14  -7  -1   57.46    5.75
  14   7  -1   56.85    2.50
  13  -7  -1   23.52    5.12
 -13  -7   1   19.79    2.66
 -13  -7   1   19.79    1.29
  13   7  -1   19.98    1.87
  12  -7  -1   64.40    5.29
  12   7  -1   67.02    2.29
 -12   7   1   65.86    2.08
 -11  -7   1   17.40    0.96
  11   7  -1   17.04    1.21
 -11   7   1   17.21    1.08
 -10  -7   1  107.75    2.71
  10  -7  -1  110.28    5.62
  10   7  -1  107.56    2.62
 -10   7   1  108.36    2.83
   9  -7  -1   10.21    3.83
   9  -7  -1    8.65    0.75
   9  -7  -1    8.81    0.37
  -9  -7   1    7.89    1.71
   8  -7  -1  270.19    6.25
  -8  -7   1  270.95    4.41
  -7  -7   1   33.49    2.12
   7  -7  -1   31.07    1.25
  -6  -7   1   25.79    1.79
   6  -7  -1   25.83    1.12
   5  -7  -1  464.36    6.12
  -5  -7   1  466.51    6.58
  -4  -7   1  270.98    6.50
  -4  -7   1  273.02    6.25
  -3  -7   1   49.97    2.12
   3   7  -1   50.39    2.04
   2  -7  -1    7.57    1.92
  -2  -7   1    6.62    1.37
  -2  -7   1    6.24    1.17
   2  -7  -1    4.53    0.92
  -2   7   1    5.98    1.12
   2   7  -1    4.11    1.58
  -2   7   1    6.32    2.33
  -1  -7   1   21.77    1.71
  -1  -7   1   23.39    2.17
   1  -7  -1   23.35    1.62
   1   7  -1   24.11    2.46
  -1   7   1   23.90    1.83
   0  -7   1  108.90    2.79
   0  -7  -1  109.49    2.71
   0  -7   1  112.36    2.21
   0   7   1  108.84    2.83
   0   7   1  107.57    2.21
  -1  -7  -1   91.42    2.50
   1  -7   1   90.85    3.16
   2  -7   1   36.43    1.62
  -2  -7  -1   36.33    1.54
  -2   7  -1   36.20    2.96
  -3  -7  -1   43.01    2.08
  -3  -7  -1   41.41    1.33
   3  -7   1   40.96    3.16
  -4  -7  -1    9.76    1.46
   4  -7   1   10.99    1.37
   5  -7   1   18.24    0.96
  -6  -7  -1   54.03    3.00
   6  -7   1   55.89    2.58
   6  -7   1   57.34    4.87
   7  -7   1   73.64    3.87
   7  -7   1   73.18    1.71
  -8  -7  -1  243.57    5.04
   8  -7   1  242.41    6.95
  -8   7  -1  238.93    4.33
  -9  -7  -1  100.79    1.25
   9  -7   1  102.35    1.54
   9  -7   1  101.67    4.79
   9   7   1  100.64    1.17
  -9   7  -1  101.23    1.50
 -10  -7  -1  121.50    2.91
 -10  -7  -1  119.64    3.66
 -10   7  -1  118.97    3.04
  11  -7   1   13.46    0.92
  11  -7   1   12.01    4.12
 -11  -7  -1   13.70    1.04
 -11  -7  -1   15.17    2.17
  11  -7   1   13.91    0.71
  11   7   1   13.48    1.33
 -12  -7  -1   28.47    1.08
  12  -7   1   27.29    4.79
 -12   7  -1   27.86    1.37
  12   7   1   29.61    1.58
 -13  -7  -1   57.67    1.29
 -13   7  -1   59.21    1.67
 -14  -7  -1    2.61    2.71
 -14   7  -1    2.57    1.37
  14   7   1    2.44    1.83
  15  -7   1   15.37    5.70
 -15  -7  -1   13.67    2.42
 -15  -7  -1   15.84    1.29
  15   7   1   14.97    2.17
  16  -7   1    9.57    5.50
 -16  -7  -1   11.59    2.71
 -16   7  -1   11.91    1.75
  16   7   1   13.15    2.58
  17  -7   1    4.35    6.91
 -17  -7  -1    3.93    2.66
  18  -7   1    8.07    7.16
 -18  -7  -1    6.72    2.62
 -18   7  -1    6.63    2.04
  19  -7   1    0.22    7.62
 -19  -7  -1    2.09    1.58
 -19   7  -1    0.16    2.12
  19  -8  -1    4.50    7.37
 -19   8   1    1.72    2.75
  18  -8  -1    9.07    7.74
 -18  -8   1    4.92    3.04
 -18  -8   1    4.92    1.50
 -18   8   1    4.92    2.04
 -17  -8   1    1.93    1.46
  16  -8  -1    1.99    5.79
 -16  -8   1    2.48    2.91
 -15  -8   1   30.84    1.29
 -15  -8   1   32.53    2.87
  14  -8  -1    0.82    4.96
 -14  -8   1    1.52    1.12
 -14   8   1    1.64    1.46
 -13  -8   1   18.41    1.33
  13   8  -1   18.96    1.71
  11  -8  -1   35.55    4.33
  10  -8  -1   14.60    0.92
  10  -8  -1   11.94    3.91
  10  -8  -1   14.37    0.58
  10   8  -1   13.93    1.04
   9  -8  -1    0.26    3.75
  -9  -8   1    0.45    1.83
   9  -8  -1    0.26    0.96
   8  -8  -1   74.12    1.96
  -8  -8   1   76.55    3.00
   8  -8  -1   75.54    4.75
  -7  -8   1   12.82    1.92
   7  -8  -1   13.38    1.25
   7  -8  -1   11.64    2.87
  -6  -8   1  119.67    2.83
   6  -8  -1  121.11    2.17
   6  -8  -1  122.35    4.37
  -5  -8   1    3.12    1.58
   5  -8  -1    3.88    1.21
   5  -8  -1    5.25    2.91
  -4  -8   1   22.09    1.17
   4  -8  -1   21.37    1.17
   4  -8  -1   23.22    2.79
  -4  -8   1   21.75    0.62
  -4  -8   1   21.01    1.58
  -3  -8   1    5.15    1.42
  -3  -8   1    3.95    1.33
   3  -8  -1    3.60    2.04
  -2  -8   1  234.09    3.71
   2  -8  -1  234.39    4.37
  -2  -8   1  231.79    3.33
   2   8  -1  235.99    3.83
   1  -8  -1  114.28    2.83
  -1  -8   1  113.79    2.96
  -1  -8   1  113.02    3.46
   1  -8  -1  113.56    3.66
  -1   8   1  114.47    4.25
   0  -8   1  736.39   15.32
   0  -8  -1  735.74   15.24
   0   8   1  751.92   15.41
   1  -8   1   56.97    1.92
  -1  -8  -1   58.12    2.17
   1   8   1   57.11    2.33
  -1   8  -1   55.41    2.91
   2  -8   1   33.02    2.25
  -2  -8  -1   31.31    2.46
   2   8   1   31.82    2.87
  -3  -8  -1  155.05    2.62
   3  -8   1  159.68    4.12
  -3  -8  -1  159.03    2.29
   3  -8   1  158.02    2.58
   3   8   1  156.63    2.71
  -4  -8  -1    3.22    1.46
   4  -8   1    1.89    1.17
   5  -8   1   20.17    3.75
  -5  -8  -1   24.78    2.50
   5  -8   1   22.47    2.04
  -6  -8  -1  276.36    4.71
   6  -8   1  273.37    6.20
   6  -8   1  276.55    4.25
  -7  -8  -1   65.62    3.12
   7  -8   1   65.64    4.79
   7  -8   1   65.70    2.37
   8  -8   1   34.11    1.71
   8  -8   1   32.47    4.50
  -8  -8  -1   35.99    2.50
   9  -8   1    4.67    1.12
  -9  -8  -1    4.65    1.79
   9  -8   1    3.81    3.62
 -10  -8  -1   37.66    2.66
  10  -8   1   38.04    1.08
  10  -8   1   38.88    4.75
  10  -8   1   36.71    1.54
 -11  -8  -1  120.08    3.41
  11  -8   1  125.06    6.00
 -11  -8  -1  119.66    2.33
 -11   8  -1  120.38    2.54
  12  -8   1   96.43    5.70
  12   8   1   91.73    1.67
 -12   8  -1   92.78    1.75
  13  -8   1    5.71    4.96
 -13  -8  -1    5.41    1.04
 -13  -8  -1    3.96    2.29
 -13   8  -1    4.17    1.25
  14  -8   1    1.82    5.29
 -14  -8  -1    1.21    1.12
 -14  -8  -1    2.72    2.58
 -15  -8  -1    1.49    2.75
  15  -8   1    1.07    5.04
 -15  -8  -1    0.95    1.08
 -15   8  -1    0.80    1.46
 -16  -8  -1   14.54    3.08
 -16  -8  -1   13.52    1.33
  16  -8   1   14.75    6.20
 -17  -8  -1    0.35    1.29
  17  -8   1    2.94    6.79
 -18  -8  -1    0.99    2.96
 -18  -8  -1    0.07    1.37
  19  -8   1    3.94    8.33
 -18  -9   1    1.65    1.46
  18  -9  -1    0.73    7.29
 -18  -9   1    2.24    3.46
  17  -9  -1    4.47    6.79
 -17   9   1    0.48    1.83
  16  -9  -1    0.05    6.00
 -16  -9   1    1.06    3.12
 -16  -9   1    0.05    1.29
 -16   9   1    0.05    1.79
 -15  -9   1    0.83    1.21
 -14  -9   1    0.39    2.87
 -14  -9   1    0.81    1.25
 -13  -9   1    1.30    1.12
 -13  -9   1    3.51    2.83
  13  -9  -1    1.61    5.33
 -13   9   1    1.84    1.37
  12  -9  -1    5.63    4.54
 -12  -9   1    6.09    2.58
 -12  -9   1    6.11    1.08
 -11  -9   1   36.06    2.83
  11  -9  -1   36.44    0.92
  11  -9  -1   35.73    4.46
  10  -9  -1   13.76    1.21
  10  -9  -1   12.43    4.62
  10  -9  -1   14.88    0.83
   9  -9  -1    0.59    3.41
  -9  -9   1    1.75    2.25
   8  -9  -1   16.87    1.25
  -8  -9   1   15.66    2.04
   8  -9  -1   16.93    3.91
  -7  -9   1   36.39    2.58
   7  -9  -1   33.87    1.75
   7  -9  -1   34.88    4.54
  -6  -9   1   11.70    1.92
   6  -9  -1   11.22    2.75
   6  -9  -1   11.57    1.25
  -5  -9   1  106.41    3.00
   5  -9  -1  103.58    4.37
   5  -9  -1  105.90    2.33
   4  -9  -1    4.13    1.29
  -4  -9   1    4.95    1.50
   4  -9  -1    4.40    2.54
  -4  -9   1    4.13    0.62
   3  -9  -1   99.23    3.08
  -3  -9   1  100.26    2.04
   3  -9  -1   96.35    1.54
   3   9  -1   98.83    1.96
  -2  -9   1  105.43    3.21
  -2  -9   1  108.26    3.62
   2  -9  -1  106.19    2.96
   2  -9  -1  107.43    4.25
  -1  -9   1  306.10    5.45
  -1  -9   1  302.83    4.91
   1  -9  -1  305.09    5.79
   0  -9   1  246.82    5.45
   0  -9  -1  250.76    5.29
   0  -9   1  253.27    4.75
   0   9  -1  253.39    6.00
   1  -9   1  109.15    4.04
   1  -9   1  108.90    2.91
   2  -9   1   77.86    2.21
  -2  -9  -1   76.51    2.50
  -3  -9  -1   12.07    1.58
   3  -9   1   12.37    2.66
   3  -9   1   13.40    1.42
  -3  -9  -1   14.98    1.29
  -4  -9  -1   75.53    1.96
   4  -9   1   77.21    1.83
   4  -9   1   76.75    3.83
   4   9   1   77.91    1.42
   5  -9   1  118.51    4.66
   5  -9   1  114.78    2.42
  -5  -9  -1  113.96    2.79
   6  -9   1  202.00    3.79
   6  -9   1  205.94    6.16
  -6  -9  -1  201.68    4.25
  -7  -9  -1  131.99    3.54
   7  -9   1  135.40    2.83
   7  -9   1  137.97    6.12
   8  -9   1    0.81    3.83
   8  -9   1    1.21    1.29
  -8  -9  -1    2.89    2.12
   9  -9   1   72.40    4.83
  -9  -9  -1   74.87    2.96
   9  -9   1   74.00    1.96
 -10  -9  -1    2.44    3.00
  10  -9   1    2.06    0.71
  10  -9   1    1.57    1.25
 -11  -9  -1   68.79    3.25
  11  -9   1   72.12    6.00
 -12  -9  -1    7.66    1.04
  12  -9   1    5.47    4.12
 -12  -9  -1    8.73    2.37
  12  -9   1    7.42    0.96
 -13  -9  -1   40.99    1.33
 -13  -9  -1   41.05    2.87
  13  -9   1   44.59    5.91
 -14  -9  -1   18.73    2.96
  14  -9   1   18.86    5.70
 -14  -9  -1   18.71    1.33
 -15  -9  -1    7.49    1.21
 -15  -9  -1    6.90    3.08
  15  -9   1    6.97    5.08
 -16  -9  -1    2.29    1.42
 -16  -9  -1    2.12    3.12
  16  -9   1    2.69    6.20
 -17  -9  -1    0.53    3.08
  17  -9   1    0.53    6.25
  18  -9   1   10.20    7.99
 -18  -9  -1    3.00    1.58
 -18 -10   1    6.00    3.75
 -18 -10   1    6.86    1.71
  18 -10  -1    9.96    7.70
 -17 -10   1    2.50    3.46
 -17 -10   1    1.26    1.50
 -16 -10   1    1.90    3.25
  15 -10  -1    8.37    6.45
 -15 -10   1    7.40    1.37
 -14 -10   1    1.52    1.21
  14 -10  -1    2.49    5.83
 -14 -10   1    1.54    2.91
  13 -10  -1   14.33    5.62
 -13 -10   1   14.55    3.00
 -12 -10   1    1.33    2.62
 -12 -10   1    1.52    1.12
  11 -10  -1   17.41    0.75
 -11 -10   1   20.04    2.75
  11 -10  -1   13.93    4.96
  10 -10  -1   20.76    3.75
 -10 -10   1   20.76    2.25
   9 -10  -1  134.36    6.33
   9 -10  -1  129.29    2.54
  -9 -10   1  131.31    3.66
   8 -10  -1   11.25    1.33
   8 -10  -1   10.38    3.87
   7 -10  -1   18.20    1.87
  -7 -10   1   18.69    2.79
  -6 -10   1    2.46    1.96
   6 -10  -1    2.48    1.25
   6 -10  -1    2.33    2.96
   5 -10  -1   50.20    2.50
  -5 -10   1   53.57    3.33
   4 -10  -1  104.86    2.58
  -4 -10   1  105.09    2.79
   4 -10  -1  108.99    4.66
  -3 -10   1   42.49    3.12
   3  10  -1   45.40    3.00
  -2 -10   1  124.76    3.79
  -2 -10   1  125.54    3.25
   2 -10  -1  124.45    4.33
   1 -10  -1  177.43    4.54
   1 -10  -1  176.27    3.41
  -1 -10   1  178.51    4.50
  -1 -10   1  174.52    3.71
   0 -10  -1   34.82    1.83
   0 -10   1   33.59    1.96
  -1 -10  -1  111.38    3.75
   1 -10   1  110.37    3.00
  -2 -10  -1   85.10    3.29
   2 -10   1   88.66    4.79
  -2 -10  -1   84.07    3.12
   3 -10   1    2.82    1.46
   3 -10   1    2.82    2.87
  -4 -10  -1    3.54    1.71
   4 -10   1    1.67    3.08
  -4 -10  -1    3.23    0.87
   4  10   1    3.25    1.29
   5 -10   1  312.99    4.50
  -5 -10  -1  309.92    4.75
   5 -10   1  313.98    6.75
   6 -10   1    3.28    3.62
   6 -10   1    2.23    1.33
  -6 -10  -1    2.23    1.79
  -7 -10  -1    2.32    2.33
   7 -10   1    1.28    1.42
   8 -10   1    7.34    1.50
   8 -10   1    5.55    3.83
  -9 -10  -1   87.05    3.54
   9 -10   1   83.99    5.75
   9 -10   1   83.28    2.54
 -10 -10  -1    0.32    2.29
  10 -10   1    0.02    4.21
  10 -10   1    0.02    1.33
  11 -10   1   47.50    5.83
  11 -10   1   48.01    1.42
  11 -10   1   46.45    1.92
 -12 -10  -1   25.39    1.21
  12 -10   1   26.67    1.29
  12 -10   1   24.25    5.33
 -12 -10  -1   27.45    2.83
 -13 -10  -1    6.00    1.21
 -13 -10  -1    4.81    2.87
 -14 -10  -1    6.68    1.33
 -15 -10  -1    4.57    1.33
 -15 -10  -1    5.33    3.08
  15 -10   1    4.51    6.00
  16 -10   1    8.88    6.58
 -16 -10  -1    7.70    1.33
 -17 -10  -1    3.77    3.46
  17 -10   1    1.23    6.83
 -17 -10  -1    1.58    1.46
 -18 -10  -1    4.90    3.71
  18 -10   1   10.84    8.08
 -18 -10  -1    4.46    1.62
  18 -11  -1    9.11    9.20
 -18 -11   1    2.72    4.12
  17 -11  -1    6.57    7.41
 -17 -11   1    0.63    1.58
 -17 -11   1    0.63    3.75
  16 -11  -1    3.80    7.00
 -16 -11   1    1.72    3.71
 -15 -11   1    2.18    3.37
 -15 -11   1    2.16    1.50
 -14 -11   1   11.69    1.54
 -14 -11   1   12.45    3.33
  14 -11  -1   10.05    5.45
 -13 -11   1    1.20    1.25
  13 -11  -1    3.76    5.66
 -13 -11   1    1.44    2.91
 -12 -11   1    0.06    1.17
  12 -11  -1    0.25    1.00
 -12 -11   1    0.06    2.83
  11 -11  -1   53.72    5.75
 -11 -11   1   56.46    3.12
  11 -11  -1   53.68    1.67
  10 -11  -1   55.02    5.37
  10 -11  -1   56.03    2.33
 -10 -11   1   57.06    3.62
  -9 -11   1    2.97    2.54
   9 -11  -1    2.97    4.12
  -8 -11   1   13.45    2.37
   8 -11  -1   12.08    1.54
  -7 -11   1   90.88    2.79
   7 -11  -1   87.74    1.92
   6 -11  -1    2.23    1.58
   6 -11  -1    4.95    4.58
  -5 -11   1    8.76    1.21
   5 -11  -1   11.71    4.04
   5 -11  -1    6.76    1.75
  -5 -11   1    8.11    2.37
   4 -11  -1   20.17    2.08
  -4 -11   1   20.36    2.29
   4  11  -1   20.53    2.08
  -3 -11   1   66.62    2.79
   3 -11  -1   68.12    2.37
   3  11  -1   69.01    3.00
   2 -11  -1   15.96    3.12
  -2 -11   1   15.41    2.08
   1 -11  -1   12.57    2.17
  -1 -11   1   13.65    2.46
   0 -11   1    1.87    2.04
   0 -11   1    1.22    2.83
   0 -11  -1    1.03    1.83
   1 -11   1   61.58    4.37
  -1 -11  -1   62.70    3.21
  -1 -11  -1   67.77    3.91
   1 -11   1   65.44    3.29
   1  11   1   66.13    4.25
   2 -11   1  193.00    5.50
  -2 -11  -1  191.59    3.62
  -3 -11  -1    3.89    1.83
   3 -11   1    4.15    1.83
   3  11   1    5.10    2.33
  -4 -11  -1    9.76    1.04
  -4 -11  -1    9.76    1.83
   4 -11   1    9.80    3.21
   5 -11   1  116.47    5.00
   5 -11   1  119.38    2.79
  -5 -11  -1  121.74    3.54
   6 -11   1  288.86    4.25
   6 -11   1  289.78    8.74
  -7 -11  -1   46.77    2.17
   8 -11   1  128.99    2.75
   8 -11   1  133.31    5.75
  -9 -11  -1   38.48    3.04
   9 -11   1   38.59    2.12
  10 -11   1   13.46    4.71
  10 -11   1   13.99    1.62
 -10 -11  -1   14.89    2.62
  11 -11   1   20.05    1.92
 -11 -11  -1   20.49    3.16
 -12 -11  -1    1.86    2.79
  12 -11   1    4.09    5.33
  12 -11   1    3.35    1.50
 -13 -11  -1   15.04    3.16
  13 -11   1   12.07    5.66
 -13 -11  -1   12.43    1.33
 -14 -11  -1   13.64    3.37
 -14 -11  -1   14.59    1.46
  14 -11   1   11.11    5.83
 -15 -11  -1   14.30    1.46
 -16 -11  -1    2.48    3.66
  16 -11   1    6.44    6.25
 -17 -11  -1    5.56    1.46
 -17 -11  -1    5.92    3.75
  17 -11   1    6.78    7.79
 -17 -12   1   15.79    1.62
  17 -12  -1   17.77    6.70
 -16 -12   1    5.12    1.50
 -16 -12   1    5.12    3.75
  16 -12  -1    5.12    6.66
 -15 -12   1    6.74    1.58
 -15 -12   1    4.45    3.71
 -14 -12   1   12.78    3.41
 -14 -12   1   13.63    1.46
  13 -12  -1   13.48    5.37
 -13 -12   1   12.95    1.42
  12 -12  -1   11.63    1.37
 -12 -12   1   12.72    3.04
  12 -12  -1   11.63    5.37
 -11 -12   1   10.35    2.83
 -10 -12   1    6.82    2.83
  10 -12  -1    9.39    4.66
   9 -12  -1    8.99    1.58
   9 -12  -1   10.63    4.16
   8 -12  -1   61.25    2.29
   8 -12  -1   63.94    5.62
  -8 -12   1   65.73    3.62
   7 -12  -1    0.08    1.50
   7 -12  -1    0.08    4.25
  -6 -12   1    3.79    2.50
   6 -12  -1    3.09    1.67
  -5 -12   1    6.55    1.37
   5 -12  -1    5.88    1.67
  -5 -12   1    5.98    0.75
   5 -12  -1    7.63    4.41
   4 -12  -1    2.30    3.41
   4 -12  -1    0.49    1.67
  -4 -12   1    0.29    2.12
   3  12  -1   62.24    3.46
  -2 -12   1    5.67    2.87
  -2 -12   1    4.13    3.33
   2 -12  -1    5.15    3.91
   2 -12  -1    4.30    2.12
   2  12  -1    4.68    3.50
  -1 -12   1    1.94    3.21
   1 -12  -1    1.27    1.75
  -1 -12   1    2.70    2.17
   0 -12   1  622.65   10.53
   0 -12  -1  621.08   10.49
   0 -12   1  629.14   11.58
  -1 -12  -1   44.19    3.00
   1 -12   1   41.60    3.54
  -1 -12  -1   42.36    2.17
  -2 -12  -1  101.44    4.25
   2 -12   1   95.09    3.46
  -3 -12  -1  223.63    4.04
   4 -12   1  127.12    2.79
  -4 -12  -1  130.72    2.42
   4  12   1  128.66    2.75
  -5 -12  -1    2.76    2.08
   5 -12   1    3.96    4.62
   6 -12   1   31.57    4.79
  -6 -12  -1   29.59    2.75
   6 -12   1   30.81    2.29
   7 -12   1    4.07    1.71
  -7 -12  -1    3.86    2.46
   7 -12   1    5.14    4.25
   8 -12   1    5.99    1.67
  -8 -12  -1    6.12    2.42
   8 -12   1    5.82    4.41
   9 -12   1   68.93    2.25
  -9 -12  -1   65.22    3.16
 -10 -12  -1    7.41    2.79
  10 -12   1    7.41    1.62
  10 -12   1    7.41    5.16
  11 -12   1    3.78    4.37
  11 -12   1    3.82    1.67
  12 -12   1    0.57    5.29
  13 -12   1    0.68    5.54
 -13 -12  -1    0.68    1.17
 -14 -12  -1    8.71    3.25
 -14 -12  -1    6.32    1.37
  14 -12   1    6.32    5.66
  15 -12   1    4.69    6.91
 -15 -12  -1    1.42    1.50
 -16 -12  -1    3.81    3.83
 -16 -12  -1    1.79    1.58
  16 -12   1    0.42    6.75
 -17 -12  -1    6.18    3.91
  17 -12   1    6.16    7.33
 -16 -13   1    0.16    1.67
 -16 -13   1    1.61    4.04
  16 -13  -1    1.03    7.33
 -15 -13   1    0.07    1.50
  15 -13  -1    0.05    6.04
 -14 -13   1    7.25    3.83
  14 -13  -1    9.46    7.25
 -13 -13   1    0.02    1.42
  12 -13  -1    4.21    1.71
  12 -13  -1    7.79    5.75
 -12 -13   1    3.47    3.25
  11 -13  -1  103.89    2.50
 -11 -13   1  100.95    4.08
  10 -13  -1    0.70    1.75
  10 -13  -1    0.70    5.16
 -10 -13   1    3.06    3.00
  -9 -13   1   17.39    3.16
   9 -13  -1   13.98    5.16
   9 -13  -1   15.52    2.00
  -8 -13   1   38.19    3.25
   8 -13  -1   36.14    1.96
   8 -13  -1   34.80    5.08
   7 -13  -1    5.64    4.83
  -7 -13   1    4.20    2.54
  -6 -13   1    3.22    2.62
   6 -13  -1    2.61    1.83
  -5 -13   1   24.82    2.75
   5 -13  -1   23.13    2.00
   5 -13  -1   22.61    4.37
  -5 -13   1   24.37    1.00
  -5 -13   1   25.11    1.67
   4 -13  -1    3.03    1.83
  -4 -13   1    3.18    2.66
  -4 -13   1    3.66    2.50
  -3 -13   1  152.26    4.79
   3 -13  -1  148.47    4.21
   3 -13  -1  148.45    6.54
   3  13  -1  148.66    5.37
  -2 -13   1    2.85    2.12
  -2 -13   1    3.09    3.37
   2 -13  -1    3.15    3.71
   1 -13  -1  170.69    5.83
  -1 -13   1  168.84    6.00
  -1 -13   1  165.28    5.75
   1 -13  -1  167.53    4.29
   0 -13  -1    9.04    2.17
   0 -13   1   10.56    3.91
   0 -13  -1    8.51    3.33
  -1 -13  -1   10.59    3.66
   1 -13   1    9.77    4.54
   2 -13   1    0.82    4.25
   2 -13   1    0.97    1.96
  -2 -13  -1    0.13    3.00
  -3 -13  -1  460.13    7.87
  -3 -13  -1  451.49    7.91
   3 -13   1  455.46    9.62
   4 -13   1    3.04    4.79
  -4 -13  -1    1.25    1.67
  -4 -13  -1    2.76    2.25
   4 -13   1    2.30    1.83
   4  13   1    0.51    2.29
   5 -13   1    6.60    2.00
  -5 -13  -1    8.12    2.62
  -6 -13  -1    1.39    2.37
   6 -13   1    1.39    4.37
   7 -13   1   34.54    2.04
  -7 -13  -1   35.40    2.91
   7 -13   1   36.01    5.08
  -8 -13  -1   35.01    3.29
   8 -13   1   32.78    5.62
   8 -13   1   33.33    2.29
   9 -13   1   55.40    2.37
  -9 -13  -1   57.70    3.54
  10 -13   1    8.37    1.83
  10 -13   1    8.65    4.71
 -10 -13  -1   10.14    3.04
 -11 -13  -1    3.18    3.25
  11 -13   1    1.01    5.37
  12 -13   1    0.63    5.29
 -12 -13  -1    0.67    3.12
  12 -13   1    0.90    1.96
 -13 -13  -1    2.14    1.46
  13 -13   1    1.19    5.91
 -13 -13  -1    3.72    3.46
 -14 -13  -1    1.41    1.58
 -15 -13  -1    2.18    3.62
 -15 -13  -1    2.63    1.62
  15 -13   1    4.86    7.33
  16 -13   1    0.69    7.16
 -16 -13  -1    1.05    1.62
 -16 -13  -1    0.69    3.79
 -16 -14   1    4.57    1.75
 -16 -14   1    3.47    4.33
  16 -14  -1    3.47    8.20
 -15 -14   1   20.93    4.21
 -15 -14   1   18.15    1.75
  15 -14  -1   19.54    6.62
 -14 -14   1    6.65    4.12
  14 -14  -1    3.70    7.12
 -13 -14   1   10.29    3.75
  13 -14  -1   10.02    5.75
  12 -14  -1   46.64    2.54
  11 -14  -1   23.71    5.45
 -11 -14   1   20.72    3.29
  10 -14  -1   17.75    5.12
 -10 -14   1   20.61    3.37
  10 -14  -1   17.75    1.87
  -9 -14   1    0.35    3.16
   9 -14  -1    0.22    2.08
  -8 -14   1   19.00    3.29
   8 -14  -1   16.87    2.25
   8 -14  -1   20.66    5.62
   7 -14  -1   13.54    5.50
   7 -14  -1   16.74    2.25
  -7 -14   1   17.64    3.41
  -6 -14   1  110.68    3.75
   6 -14  -1  110.56    2.96
  -5 -14   1    2.24    2.87
   5 -14  -1    2.24    4.54
  -5 -14   1    3.27    1.71
  -4 -14   1   32.46    2.91
   4 -14  -1   28.78    2.29
   4  14  -1   30.33    2.62
   3 -14  -1   34.14    4.83
  -3 -14   1   32.35    2.62
  -3 -14   1   33.15    3.46
   3 -14  -1   33.86    2.42
   3  14  -1   35.44    3.58
  -2 -14   1    8.90    2.54
  -1 -14   1   47.44    4.37
  -1 -14   1   43.56    2.75
   1 -14  -1   47.12    2.71
   0 -14   1   21.88    4.46
   0 -14  -1   19.61    4.29
  -1 -14  -1   12.68    3.91
  -1 -14  -1   11.25    2.62
   1 -14   1    9.57    4.29
  -2 -14  -1    8.91    3.58
   2 -14   1    7.70    4.12
   2 -14   1    8.32    2.62
  -2 -14  -1    9.43    2.71
  -3 -14  -1   27.17    2.91
   3 -14   1   22.72    4.91
  -3 -14  -1   25.50    3.04
   4 -14   1    3.08    4.62
  -4 -14  -1    2.24    2.50
   4 -14   1    1.74    2.37
  -5 -14  -1   13.71    2.91
   5 -14   1   11.68    2.62
   6 -14   1   11.51    2.00
   6 -14   1   11.63    4.50
  -6 -14  -1   11.65    2.46
  -7 -14  -1   10.98    2.91
   7 -14   1   15.21    4.87
   7 -14   1   12.81    2.00
  -8 -14  -1   31.51    3.71
   8 -14   1   33.36    5.83
   8 -14   1   30.09    2.58
  -9 -14  -1   28.89    3.66
   9 -14   1   27.69    6.16
 -10 -14  -1    3.02    3.08
  11 -14   1    6.40    2.17
 -11 -14  -1    4.74    3.58
  12 -14   1    3.20    5.87
 -12 -14  -1    4.97    3.41
  12 -14   1    3.41    2.17
 -13 -14  -1    8.61    1.46
 -14 -14  -1   14.68    3.87
  14 -14   1   13.27    6.58
 -14 -14  -1   14.13    1.62
  15 -14   1    0.04    7.16
 -15 -14  -1    0.04    1.62
 -15 -14  -1    0.93    4.08
  16 -14   1    0.12    9.45
 -16 -14  -1    1.26    1.79
 -16 -14  -1    0.10    4.37
 -15 -15   1    2.52    4.50
  14 -15  -1    1.51    6.75
 -14 -15   1    1.51    4.33
 -13 -15   1    4.36    3.83
  13 -15  -1    7.42    7.29
  12 -15  -1    2.48    6.66
 -11 -15   1    2.66    3.54
  11 -15  -1    4.77    2.29
  11 -15  -1    7.90    6.41
  10 -15  -1   19.17    2.33
 -10 -15   1   22.20    3.71
  10 -15  -1   21.38    6.66
   9 -15  -1   14.70    5.54
   9 -15  -1   15.82    2.21
   8 -15  -1   25.06    2.37
   8 -15  -1   22.76    6.00
  -8 -15   1   25.17    3.41
   7 -15  -1    3.43    5.20
  -7 -15   1    3.87    3.33
   7 -15  -1    3.43    2.25
   6 -15  -1    8.02    2.66
  -6 -15   1    4.99    3.21
   6 -15  -1    7.95    5.37
   5 -15  -1    1.84    2.79
  -5 -15   1    2.71    2.96
   5 -15  -1    3.88    4.91
  -5 -15   1    1.08    2.00
   4 -15  -1    8.69    2.42
  -4 -15   1    4.77    2.87
  -4 -15   1    7.83    3.21
   4  15  -1    7.22    2.75
  -3 -15   1   65.41    4.25
  -3 -15   1   64.61    3.00
   3 -15  -1   64.38    2.58
  -2 -15   1  169.36    4.83
   2 -15  -1  170.88    4.54
   1 -15  -1   74.27    3.46
  -1 -15   1   70.99    3.16
   0 -15  -1   19.45    2.96
   0 -15   1   20.32    3.00
  -1 -15  -1   18.32    2.71
  -1 -15  -1   18.17    4.46
   1 -15   1   17.83    4.41
   1 -15   1   19.27    2.62
  -2 -15  -1    3.46    3.91
   2 -15   1    5.97    4.96
  -2 -15  -1    3.25    2.83
   2 -15   1    3.93    2.42
  -3 -15  -1   10.35    3.12
  -3 -15  -1    9.82    2.91
   3 -15   1   11.05    7.54
  -4 -15  -1    4.07    2.91
  -4 -15  -1    3.86    2.29
   4 -15   1    4.53    2.29
   4 -15   1    3.25    4.46
   4  15   1    3.08    2.66
   5 -15   1    1.74    2.42
  -5 -15  -1    1.97    2.91
   5 -15   1    0.98    5.04
  -6 -15  -1   43.13    2.96
   7 -15   1    2.27    2.37
   7 -15   1    6.97    5.37
   8 -15   1   21.00    2.71
   8 -15   1   23.64    6.20
  -8 -15  -1   22.82    3.66
   9 -15   1   26.82    2.42
  -9 -15  -1   26.94    3.25
 -10 -15  -1    8.23    3.50
  10 -15   1    4.25    2.25
  10 -15   1    4.25    6.54
 -11 -15  -1    4.56    3.83
  11 -15   1    6.26    6.41
  11 -15   1    5.25    2.62
  12 -15   1    0.26    2.46
 -13 -15  -1    0.26    4.00
 -14 -15  -1    4.72    4.50
  15 -15   1    4.45    7.58
 -15 -15  -1    3.38    4.58
 -14 -16   1    3.79    4.58
  14 -16  -1    4.26    6.87
 -14 -16   1    3.79    1.75
  13 -16  -1    9.84    7.91
  12 -16  -1    5.00    7.04
 -11 -16   1    7.76    4.16
  11 -16  -1    8.12    2.50
  10 -16  -1   21.42    6.62
  10 -16  -1   18.16    2.58
   9 -16  -1    0.94    2.71
   9 -16  -1    0.14    6.00
   7 -16  -1   12.06    2.50
  -7 -16   1   11.47    3.33
   6 -16  -1    7.36    2.54
  -6 -16   1    6.65    3.16
   6 -16  -1    7.09    5.37
   5 -16  -1    1.63    5.79
  -5 -16   1    2.15    3.29
   4 -16  -1    3.83    2.54
  -4 -16   1    4.71    3.66
   4 -16  -1    3.83    5.50
  -4 -16   1    6.54    3.54
   3 -16  -1    5.00    2.50
  -3 -16   1    5.00    4.21
  -2 -16   1    0.99    2.96
  -2 -16   1    2.57    4.83
   2 -16  -1    0.99    5.29
   1 -16  -1   17.62    5.25
  -1 -16   1   18.00    5.37
  -1 -16   1   19.20    3.29
   0 -16  -1    0.10    5.20
   0 -16  -1    0.10    2.83
   0 -16   1    0.10    5.04
   0 -16   1    0.10    2.62
  -1 -16  -1   11.32    3.08
  -1 -16  -1   11.55    4.83
   1 -16   1   10.60    5.58
  -2 -16  -1    0.61    2.87
  -2 -16  -1    3.56    4.37
   2 -16   1    2.55    2.75
   3 -16   1   79.08    2.96
   3 -16   1   77.84    5.83
  -3 -16  -1   76.01    3.08
   4 -16   1    3.89    6.04
   4 -16   1    3.70    2.66
  -4 -16  -1    2.82    3.25
   5 -16   1   18.81    6.33
   5 -16   1   18.77    2.71
  -5 -16  -1   19.87    3.46
   6 -16   1    0.46    5.87
  -7 -16  -1    3.61    3.21
   8 -16   1    0.41    2.46
   8 -16   1    0.41    5.66
  -9 -16  -1    7.13    3.79
   9 -16   1    7.13    5.79
  10 -16   1    3.18    2.75
  10 -16   1    2.91    6.00
  11 -16   1    6.46    2.62
 -12 -16  -1    0.44    4.00
  13 -16   1    0.02    7.45
 -13 -16  -1    0.02    4.46
 -14 -16  -1    3.80    4.58
  14 -16   1    9.16    7.70
 -14 -16  -1    3.80    1.67
 -14 -17   1   10.44    5.16
 -14 -17   1    6.74    1.96
 -13 -17   1    4.00    4.75
  13 -17  -1    4.57    7.62
  12 -17  -1   11.65    8.33
  11 -17  -1    5.85    2.91
  10 -17  -1   14.05    3.29
  10 -17  -1   12.60    6.75
  -9 -17   1   15.59    4.66
   9 -17  -1   10.70    6.66
   8 -17  -1    0.30    2.96
  -8 -17   1    0.32    3.62
   8 -17  -1    0.32    6.29
  -7 -17   1    9.67    3.50
   7 -17  -1    9.67    2.79
   7 -17  -1    9.67    6.37
   6 -17  -1    4.05    2.91
   6 -17  -1    1.10    6.75
  -6 -17   1    2.62    3.58
  -5 -17   1   13.21    2.46
  -4 -17   1    4.47    3.25
   4 -17  -1    4.56    2.79
   3 -17  -1   18.20    6.91
  -3 -17   1    8.72    5.12
   3 -17  -1   14.16    2.96
  -3 -17   1   11.95    3.50
   2 -17  -1    7.48    5.91
  -2 -17   1    8.31    5.45
   2 -17  -1    7.48    2.66
  -1 -17   1   25.71    6.29
   1 -17  -1   23.81    7.08
   0 -17   1   15.35    3.12
   0 -17  -1   15.54    2.91
   0 -17   1   13.47    6.04
   1 -17   1   10.60    6.87
   1 -17   1    8.47    2.79
  -1 -17  -1    6.75    5.91
   2 -17   1    0.02    6.33
  -2 -17  -1    2.02    4.62
   2 -17   1    3.60    2.96
   3 -17   1   41.20    3.25
   3 -17   1   49.02    7.08
  -3 -17  -1   45.35    4.33
   4 -17   1    7.14    6.41
   4 -17   1    8.40    3.00
   5 -17   1    8.14    2.87
  -5 -17  -1    6.82    1.42
  -5 -17  -1    6.82    3.29
   5 -17   1    6.82    6.45
   6 -17   1    8.63    6.91
   6 -17   1   13.46    2.96
  -6 -17  -1   10.78    3.58
  -7 -17  -1    1.26    3.58
   7 -17   1    1.26    2.71
   8 -17   1    9.42    2.91
   8 -17   1   10.92    6.50
  -9 -17  -1   19.95    4.12
   9 -17   1   21.91    6.91
  10 -17   1    2.41    6.75
 -10 -17  -1    0.03    3.96
  10 -17   1    0.22    3.00
 -11 -17  -1    2.55    4.41
 -12 -17  -1    1.87    4.37
  12 -17   1    6.48    7.91
  13 -17   1    7.73    7.37
 -14 -17  -1    1.02    4.79
 -12 -18   1    2.28    4.79
  12 -18  -1    2.28    8.04
  11 -18  -1    6.46    7.95
 -11 -18   1    6.86    4.96
  11 -18  -1    7.69    3.29
  10 -18  -1   13.92    8.08
 -10 -18   1   11.73    4.50
  -9 -18   1   27.68    4.83
   9 -18  -1   29.43    3.46
   8 -18  -1    0.23    3.21
   8 -18  -1    3.39    7.12
  -8 -18   1    1.75    4.41
   7 -18  -1   32.12    3.33
  -7 -18   1   28.37    4.41
   7 -18  -1   23.86    7.45
   6 -18  -1   24.45    3.16
  -6 -18   1   22.26    3.79
  -5 -18   1    4.15    3.58
   5 -18  -1    5.35    3.12
   5 -18  -1    3.41    7.54
  -4 -18   1    9.74    4.46
  -4 -18   1    9.17    3.37
   4 -18  -1   15.57    7.54
   4 -18  -1    9.55    3.16
  -3 -18   1   12.62    3.50
  -3 -18   1   13.97    5.95
   3 -18  -1    9.61    6.83
   2 -18  -1    5.64    3.12
  -2 -18   1    5.50    6.70
  -2 -18   1    4.78    3.41
  -1 -18   1    6.51    6.83
  -1 -18   1    5.94    3.62
   0 -18   1    9.17    7.50
   0 -18  -1    7.06    7.25
   0 -18   1    6.29    3.21
  -1 -18  -1   11.54    3.16
  -1 -18  -1   10.89    6.20
   1 -18   1   12.95    7.50
   1 -18   1   11.25    2.96
  -2 -18  -1    2.69    3.50
   2 -18   1    2.56    3.16
   2 -18   1    1.44    7.04
  -3 -18  -1    4.28    4.54
  -3 -18  -1    3.77    3.33
  -4 -18  -1    5.64    3.83
   4 -18   1    1.24    6.91
   4 -18   1    1.66    3.04
   5 -18   1    3.50    3.12
  -5 -18  -1    3.84    3.71
   6 -18   1   16.72    7.04
  -6 -18  -1   20.45    3.58
   6 -18   1   16.72    2.96
   7 -18   1    1.98    7.04
  -7 -18  -1    2.51    4.12
   8 -18   1   18.23    3.25
   8 -18   1   21.95    7.20
  -8 -18  -1   19.68    4.08
   9 -18   1   18.76    7.79
  -9 -18  -1   11.37    4.33
   9 -18   1   12.84    3.29
 -10 -18  -1    4.24    4.21
  10 -18   1    5.91    3.37
  10 -18   1    1.80    7.66
  11 -18   1    0.97    3.29
  11 -18   1    0.06    7.58
 -12 -18  -1    6.30    4.96
  12 -18   1    9.71    8.29
  13 -18   1    5.28    9.83
  12 -19  -1    3.71    9.16
 -12 -19   1    7.18    5.58
  11 -19  -1    3.25    7.79
 -11 -19   1    7.44    4.91
  10 -19  -1    5.42    8.24
 -10 -19   1    7.19    5.25
   9 -19  -1    2.48    8.87
   9 -19  -1    3.37    3.33
  -8 -19   1    6.90    4.41
   8 -19  -1    6.90    3.25
   7 -19  -1    0.49    3.25
   7 -19  -1    2.66    7.95
  -7 -19   1    0.49    4.37
   6 -19  -1    7.05    8.45
  -6 -19   1    3.57    4.29
  -5 -19   1    3.80    4.21
   4 -19  -1    4.50    8.08
   4 -19  -1    5.58    3.58
   3 -19  -1   17.00    3.62
  -3 -19   1   16.71    6.29
   3 -19  -1   15.76    9.04
  -3 -19   1   13.57    4.04
   2 -19  -1    6.28    3.50
  -2 -19   1    5.58    3.83
  -2 -19   1    6.22    7.50
  -1 -19   1   86.78    8.66
   1 -19  -1   90.36    4.12
   1 -19  -1   91.46    9.41
   0 -19  -1   11.21   13.07
   0 -19  -1   14.25    3.58
   0 -19   1   11.21    3.62
   1 -19   1    2.59    8.62
  -1 -19  -1    3.64    6.58
  -2 -19  -1   18.92    6.12
  -2 -19  -1   18.92    3.54
   3 -19   1   47.93    8.99
  -3 -19  -1   44.90    3.83
   3 -19   1   48.21    3.62
  -4 -19  -1    3.21    4.04
   4 -19   1    8.14    8.79
   6 -19   1    4.72    3.33
   6 -19   1    1.51    8.37
  -7 -19  -1    2.13    4.08
   7 -19   1    2.81    7.62
   7 -19   1    2.13    3.21
  -8 -19  -1    2.80    4.46
   8 -19   1    0.25    7.66
   8 -19   1    0.25    3.46
  -9 -19  -1    6.37    4.46
   9 -19   1    8.38    8.87
 -10 -19  -1    0.20    4.58
  10 -19   1    0.20    3.58
 -11 -19  -1    5.64    5.00
  11 -19   1   10.55    8.62
 -12 -19  -1   11.58    5.16
  10 -20  -1   10.34    3.66
 -10 -20   1    9.22    5.04
  10 -20  -1   16.70    8.37
  -9 -20   1    1.71    5.00
   9 -20  -1    1.90    8.37
   8 -20  -1    2.47    3.58
   7 -20  -1    4.08    3.54
   6 -20  -1    1.92    8.95
   6 -20  -1    0.57    3.41
  -6 -20   1    0.13    4.41
  -5 -20   1    0.13    4.54
   5 -20  -1    5.86    9.49
   5 -20  -1    0.75    3.71
   4 -20  -1   34.18    9.62
  -4 -20   1   31.15    4.58
   3 -20  -1    6.98    3.41
  -3 -20   1    6.98    4.21
   3 -20  -1   15.39    9.70
  -3 -20   1    6.98    6.58
   2 -20  -1    7.57    3.62
  -2 -20   1    7.93    7.74
   2 -20  -1    6.10   10.04
  -1 -20   1    0.16    3.58
   1 -20  -1    0.16    9.24
   1 -20  -1    0.16    3.37
  -1 -20   1    2.79    9.62
   0 -20   1   16.97    3.71
   0 -20  -1   23.72    7.91
   1 -20   1    8.26    3.91
   1 -20   1    4.40    9.29
  -1 -20  -1    4.17    7.79
  -1 -20  -1    8.43    3.96
   2 -20   1   34.32    9.83
  -2 -20  -1   36.46    7.12
  -2 -20  -1   34.53    4.37
   2 -20   1   33.68    3.87
  -3 -20  -1   19.11    8.45
   3 -20   1   17.12    9.58
  -3 -20  -1   13.35    3.87
   4 -20   1    9.09    9.79
   4 -20   1    4.97    3.66
   5 -20   1    0.45    8.99
   5 -20   1    0.45    3.25
   6 -20   1   13.05    3.83
  -6 -20  -1    9.93    4.33
   6 -20   1    9.93    9.08
   7 -20   1    4.72    3.79
   7 -20   1    7.19    9.87
   8 -20   1    1.00    3.71
  -8 -20  -1    0.28    5.04
   8 -20   1    3.38    8.66
   9 -20   1    2.21    8.66
  -9 -20  -1    2.21    4.58
  10 -20   1    1.24    9.12
  10 -20   1    2.33    4.21
   9 -21  -1    3.36   10.99
   9 -21  -1    5.66    3.83
  -9 -21   1    3.36    8.41
  -8 -21   1   13.79    4.87
   8 -21  -1   13.79    3.91
   7 -21  -1    3.70   10.49
  -7 -21   1    2.96    4.83
   6 -21  -1    0.86    3.71
  -6 -21   1    0.57    4.71
   5 -21  -1    2.11    3.75
   5 -21  -1    0.32   10.78
  -5 -21   1    0.32    4.79
   4 -21  -1    3.56    3.91
  -4 -21   1    1.22    4.21
   4 -21  -1    9.08   11.24
  -3 -21   1    2.72    4.46
   3 -21  -1    1.23   10.58
   2 -21  -1    1.91   10.53
  -2 -21   1    1.91    8.16
  -1 -21   1    4.10    4.12
   1 -21  -1    4.54    4.00
   0 -21  -1    9.02    9.08
   0 -21   1    5.71   10.83
   1 -21   1   19.12    4.04
  -1 -21  -1   17.52    4.16
   1 -21   1   18.43   10.41
  -2 -21  -1   22.68    7.16
   2 -21   1   26.22    3.79
   2 -21   1   34.17   10.99
  -4 -21  -1    0.45    4.58
   4 -21   1    4.60   10.33
   4 -21   1    0.45    3.50
   5 -21   1   10.18   10.66
  -5 -21  -1    1.48    4.58
   5 -21   1    2.23    3.87
  -6 -21  -1   18.11    4.96
   6 -21   1   13.45    9.74
   6 -21   1   11.85    3.83
  -7 -21  -1    3.66    5.50
   7 -21   1    8.00   10.66
   8 -21   1    4.86    4.25
   8 -21   1    2.25   10.08
  -6 -22   1    2.27    5.08
   6 -22  -1    0.31   11.95
   6 -22  -1    4.51    4.21
  -5 -22   1    9.31    5.08
   5 -22  -1    7.81    4.29
  -4 -22   1    9.91    5.08
   4 -22  -1   11.57    4.16
   4 -22  -1   19.66   12.20
   3 -22  -1    9.00    3.87
   3 -22  -1    9.00   12.12
  -3 -22   1    9.46    4.66
   2 -22  -1    2.38    4.12
  -2 -22   1    2.70    4.71
   2 -22  -1    4.82   10.70
  -1 -22   1    3.65   10.28
  -1 -22   1    0.92    4.41
   0 -22   1   11.92   11.53
   0 -22   1    5.08    4.58
   0 -22  -1    2.82   10.37
  -1 -22  -1    7.91    4.50
   1 -22   1    7.36   11.91
   1 -22   1    3.85    4.37
  -2 -22  -1    2.98    4.58
   2 -22   1    0.35    4.37
   3 -22   1   14.29   12.45
   3 -22   1    7.28    4.33
   4 -22   1    8.68    4.29
   4 -22   1   10.90   12.49
   5 -22   1   23.63   12.45
  -5 -22  -1   19.87    5.04
   5 -22   1   22.64    4.29
   6 -22   1    4.00    4.16
   6 -22   1    7.24   12.24
  -6 -22  -1   10.89    5.75
   7 -22   1   13.84   12.37
   4 -23  -1   16.28   12.37
   4 -23  -1   10.07    4.66
   3 -23  -1    8.10    4.62
  -3 -23   1   12.97    5.45
  -2 -23   1    2.19    4.58
   2 -23  -1    3.75   11.70
   2 -23  -1    2.19    4.50
  -1 -23   1    1.39    4.58
   1 -23  -1    4.09   11.45
   0 -23   1    1.16   11.95
   0 -23   1    2.63    4.79
   0 -23  -1    5.58   18.86
   0 -23  -1    0.84    4.83
   1 -23   1   19.14   13.16
   1 -23   1    9.62    4.66
   2 -23   1    6.89    4.66
   2 -23   1   10.45   13.12
  -3 -23  -1    1.11    4.83
  -4 -23  -1   10.47    8.24
   4 -23   1   22.66   13.45
   4 -23   1   14.18    4.50
 -20   0   2    1.70    1.75
  18   0  -2    6.16    5.87
  16   0  -2    7.11    4.91
 -14   0   2   16.32    0.87
  14   0  -2   16.72    4.37
 -12   0   2    1.00    0.87
  12   0  -2    2.43    3.29
 -12   0   2    0.85    0.58
  10   0  -2   18.45    2.83
 -10   0   2   16.48    0.75
 -10   0   2   17.07    0.62
  -8   0   2    5.08    0.58
  -8   0   2    5.06    0.58
  -6   0   2   44.18    0.92
  -6   0   2   44.26    0.96
   6   0  -2   45.40    2.25
   4   0  -2  111.84    1.92
  -4   0   2  109.31    2.79
   4   0  -2  113.08    2.79
  -4   0   2  112.20    1.96
  -2   0   2  112.68    4.50
  -2   0   2  115.36    4.79
  -2   0  -2 1482.52    7.70
  -2   0  -2 1488.33    7.29
   2   0   2 1493.98    7.29
  -2   0  -2 1494.11    7.29
  -4   0  -2   71.87    2.37
  -6   0  -2   55.73    1.00
   6   0   2   57.17    2.58
   6   0   2   55.00    1.17
   8   0   2   19.72    2.37
   8   0   2   21.13    0.96
  -8   0  -2   21.24    0.62
  -8   0  -2   20.90    0.67
 -10   0  -2    0.44    0.62
  10   0   2    0.53    2.83
 -12   0  -2    4.52    0.92
  12   0   2    4.90    3.79
 -14   0  -2    1.26    1.04
  14   0   2    2.98    1.79
 -14   0  -2    1.66    0.92
 -16   0  -2    9.37    1.12
  16   0   2   10.02    5.50
 -18   0  -2   27.92    1.67
 -20   0  -2    8.62    2.42
  20  -1  -2   23.96    7.08
 -20  -1   2   21.41    2.17
 -20   1   2   20.71    2.04
 -19  -1   2    1.40    1.75
  19  -1  -2    3.04    6.20
  19   1  -2    3.15    5.45
 -18  -1   2    9.34    1.50
  18  -1  -2    7.97    5.95
 -18   1   2   10.52    1.67
 -17  -1   2    3.79    1.29
  17   1  -2    3.79    5.08
 -16  -1   2   17.16    1.54
 -16   1   2   17.08    1.62
  16   1  -2   20.36    5.20
  15  -1  -2    7.11    4.58
 -15  -1   2    5.36    1.04
 -15   1   2    5.36    1.21
  15   1  -2    5.49    3.96
 -14  -1   2   90.99    2.12
  14  -1  -2   88.49    5.62
 -14  -1   2   91.14    2.58
  14   1  -2   94.24    5.66
 -14   1   2   93.18    2.75
 -13  -1   2   19.68    0.96
  13   1  -2   21.12    3.37
 -12  -1   2   42.09    2.04
 -12   1   2   40.15    2.17
 -10  -1   2  256.85    4.50
  10  -1  -2  253.99    6.54
 -10   1   2  255.42    4.58
   9  -1  -2    6.33    2.79
  -9  -1   2    7.24    1.00
  -9   1   2    6.92    0.58
  -9   1   2    6.64    0.83
   8  -1  -2  188.10    5.79
  -8  -1   2  185.20    6.04
  -8   1   2  186.65    3.91
   8   1  -2  184.93    5.45
  -7  -1   2  134.97    2.87
   7   1  -2  138.46    2.91
   7   1  -2  138.59    4.04
   6  -1  -2   78.95    3.62
  -6  -1   2   77.73    2.17
  -6  -1   2   76.21    3.29
  -6   1   2   75.60    3.87
   6   1  -2   75.31    2.33
   6   1  -2   78.30    3.25
   5  -1  -2   22.51    0.75
  -5  -1   2   22.36    0.79
  -5  -1   2   22.95    1.04
   5   1  -2   23.43    1.04
  -5   1   2   22.40    0.79
  -4  -1   2  286.94    6.00
  -4  -1   2  279.93    5.45
   4  -1  -2  281.82    5.41
  -4   1   2  280.39    5.41
  -4   1   2  283.87    6.29
   3  -1  -2    1.02    1.21
  -3  -1   2    0.94    0.75
   3  -1  -2    0.98    0.21
  -3   1   2    1.02    0.25
   3   1  -2    1.04    0.75
  -2  -1   2  771.50   11.24
   2  -1  -2  765.89   11.03
   2   1  -2  761.53   11.20
  -2   1   2  767.60   11.03
  -2   1   2  775.63   11.49
  -1  -1   2    7.76    0.42
  -1   1   2    7.89    0.29
   1  -1   2   58.65    0.08
  -1  -1  -2   57.28    0.25
  -1   1  -2   58.25    0.79
   2  -1   2  355.68   10.99
  -2   1  -2  351.72   10.99
   3  -1   2   28.71    0.17
  -3  -1  -2   31.45    0.17
  -3  -1  -2   27.20    0.37
  -3   1  -2   29.47    0.17
   3   1   2   26.96    0.37
  -4  -1  -2   92.30    0.92
  -4  -1  -2   93.36    0.79
   4  -1   2   93.61    0.79
  -4   1  -2   93.49    0.83
   4   1   2   93.34    0.79
  -4   1  -2   90.89    2.37
   4   1   2   93.15    1.00
  -5  -1  -2  298.03    6.66
  -5  -1  -2  295.82    5.70
   5   1   2  292.34    6.50
   6  -1   2 1537.34   30.06
  -7  -1  -2  198.51    3.96
   7   1   2  196.19    5.25
  -8  -1  -2  622.67   13.70
   8  -1   2  619.23   15.16
   8   1   2  616.10   14.91
   9  -1   2    0.25    0.87
  -9  -1  -2    0.46    0.54
   9  -1   2    0.14    2.62
  -9  -1  -2    0.12    0.67
  -9   1  -2    0.46    0.50
   9   1   2    0.46    2.29
  -9   1  -2    0.46    0.58
  10  -1   2   54.22    3.96
 -10  -1  -2   55.07    1.79
 -10  -1  -2   53.21    1.71
  10   1   2   56.01    4.08
 -10   1  -2   53.36    1.92
 -11  -1  -2  221.55    4.37
  11  -1   2  222.71    7.08
 -11  -1  -2  222.47    4.29
  11   1   2  216.38    6.50
 -11   1  -2  221.95    4.46
 -12  -1  -2  316.42    6.66
  12   1   2  314.69    8.95
 -12   1  -2  314.97    6.70
  13  -1   2    1.97    1.37
  13   1   2    3.55    2.33
 -13   1  -2    2.47    0.79
  13   1   2    2.09    3.54
 -14  -1  -2   11.76    1.04
 -14  -1  -2   11.16    1.04
  14  -1   2   11.37    1.54
 -14   1  -2   12.20    0.83
  15  -1   2   20.76    5.12
  15   1   2   17.62    4.83
 -16  -1  -2    4.88    1.25
 -16  -1  -2    5.43    1.12
  16   1   2    8.44    5.29
  17  -1   2    4.94    6.29
  17   1   2    1.95    5.50
 -18  -1  -2    7.41    1.54
  18  -1   2    7.06    6.50
  18   1   2    7.24    6.20
  19  -1   2    1.49    6.70
 -19  -1  -2    0.62    1.62
  20  -1   2    3.37    7.37
 -20  -1  -2    0.35    2.71
 -20   1  -2    0.33    2.87
 -20  -2   2    0.11    1.96
  20  -2  -2    2.34    6.91
  20   2  -2    0.11    5.25
 -20   2   2    0.11    2.08
  19  -2  -2    1.10    6.45
 -19  -2   2    1.27    1.62
 -19   2   2    1.10    1.83
  19   2  -2    1.08    5.25
  18  -2  -2    1.38    6.04
 -18  -2   2    1.38    1.33
  18   2  -2    3.49    5.00
  17   2  -2    7.71    4.41
 -16  -2   2    1.89    1.17
  16  -2  -2    3.89    5.16
  16   2  -2    1.23    4.16
  15  -2  -2   12.06    4.79
 -15  -2   2   12.59    1.12
 -15   2   2   11.60    1.33
  14  -2  -2    4.50    4.50
 -14   2   2    4.50    1.17
  14   2  -2    4.50    3.41
  13  -2  -2  134.91    6.54
 -13   2   2  135.33    3.50
  12  -2  -2  123.29    6.29
 -12   2   2  117.84    3.12
  11  -2  -2   73.64    4.25
 -11  -2   2   69.82    1.83
  10  -2  -2    2.44    3.29
 -10  -2   2    2.08    0.71
  10   2  -2    1.91    2.33
  10   2  -2    1.78    1.29
 -10   2   2    1.55    0.71
  -9  -2   2  196.97    2.87
  -9  -2   2  193.58    3.08
   9  -2  -2  196.04    4.96
   9   2  -2  198.34    4.37
   9   2  -2  194.31    3.21
  -9   2   2  193.70    3.00
  -8  -2   2   18.76    0.54
  -8   2   2   18.63    0.62
   8   2  -2   19.77    1.08
   8   2  -2   18.21    1.75
  -7  -2   2  118.83    5.20
   7  -2  -2  119.12    5.62
  -7  -2   2  118.51    4.00
   7   2  -2  116.83    4.21
  -7   2   2  118.45    4.04
  -6  -2   2  167.79    1.87
  -6  -2   2  168.75    1.62
   6  -2  -2  168.54    3.29
   6   2  -2  168.08    1.87
  -6   2   2  167.45    1.62
   5  -2  -2  345.17    8.49
  -5  -2   2  342.26    8.54
  -5  -2   2  349.47    9.12
   5  -2  -2  346.71    9.62
  -5   2   2  345.65    8.54
   5   2  -2  347.84    8.74
  -5   2   2  349.76    9.70
   4  -2  -2   21.64    2.04
   4  -2  -2   20.09    0.54
  -4   2   2   19.81    0.62
  -3  -2   2   11.70    1.00
  -3   2   2   12.46    1.79
  -3   2   2   11.58    0.62
  -2  -2   2   85.55    0.37
   2  -2  -2   85.50    0.29
   2  -2  -2   85.19    0.96
   2  -2  -2   85.57    0.17
   2   2  -2   85.50    0.37
  -2   2   2   85.40    1.00
  -2   2   2   85.46    0.33
   1  -2  -2  787.38   12.62
   1  -2  -2  805.52   12.91
  -1  -2   2  788.19   12.74
  -1   2   2  795.81   12.62
   0  -2  -2   16.68    1.08
   0  -2  -2   16.89    1.21
   0  -2   2   17.19    1.62
   0   2   2   17.21    1.21
   1   2   2  178.18    4.79
   1   2   2  178.90    4.91
   2  -2   2   24.20    1.37
   2  -2   2   27.00    0.29
  -2   2  -2   25.49    0.25
  -2   2  -2   27.70    1.58
  -3  -2  -2   54.59    1.25
  -3  -2  -2   54.50    1.83
   3   2   2   54.27    1.29
   4  -2   2  274.62    6.58
   4  -2   2  272.66    5.37
  -4  -2  -2  273.74    6.00
   4   2   2  268.51    5.87
  -4   2  -2  269.57    5.41
  -5  -2  -2  490.85    8.95
   5  -2   2  487.43    8.91
   5  -2   2  487.62   10.08
   5   2   2  496.76    9.58
  -5   2  -2  492.43    8.95
   6  -2   2    2.32    2.17
  -6  -2  -2    2.70    0.79
  -6  -2  -2    2.89    0.46
   6  -2   2    2.85    0.46
  -6   2  -2    2.61    0.50
   6   2   2    3.25    1.71
   6   2   2    2.68    0.92
  -6   2  -2    4.70    2.46
   7  -2   2   26.55    3.83
  -7  -2  -2   25.42    2.00
  -7   2  -2   25.04    1.83
   8  -2   2 1005.10   19.11
  -9  -2  -2  373.16    7.08
   9  -2   2  379.08    8.91
 -10  -2  -2    3.16    0.58
 -10  -2  -2    3.25    0.92
  10  -2   2    3.16    0.92
  10   2   2    3.10    2.71
 -10   2  -2    3.16    0.71
 -11  -2  -2   90.12    2.29
 -12  -2  -2  110.50    2.42
  12  -2   2  110.12    6.00
  13  -2   2   11.80    1.17
 -13  -2  -2   11.93    0.92
  13   2   2    9.95    3.75
 -14  -2  -2   15.16    1.25
  14  -2   2   13.56    1.33
  14   2   2   10.99    3.91
 -14   2  -2   13.18    1.25
  15  -2   2   16.22    5.25
 -15  -2  -2   12.95    1.04
 -15  -2  -2   14.30    1.25
  15   2   2   11.75    4.58
 -16  -2  -2    5.59    1.25
 -16  -2  -2    5.30    1.25
  16  -2   2    3.99    5.70
  16   2   2    5.42    4.46
  17  -2   2    4.22    5.95
 -17  -2  -2    5.52    1.42
  17   2   2    6.62    5.37
  18  -2   2    7.01    6.45
 -18  -2  -2    3.62    1.50
  18   2   2    5.43    5.95
  19  -2   2    3.70    7.00
 -19  -2  -2    1.01    1.67
  20  -2   2    0.32    7.45
 -20   3   2    0.15    3.21
  20   3  -2    0.15    5.08
 -19  -3   2    3.14    1.46
  19  -3  -2    3.14    6.33
 -19   3   2    3.14    1.87
  18  -3  -2    0.06    5.95
 -18  -3   2    0.65    1.37
  18   3  -2    1.13    4.37
  17  -3  -2    0.10    5.25
  17   3  -2    0.10    4.08
 -16  -3   2    7.76    1.33
  16  -3  -2    8.51    5.66
 -16  -3   2    8.12    1.46
  16   3  -2    6.05    4.29
  15  -3  -2   29.17    5.33
 -15  -3   2   28.35    1.50
 -15  -3   2   27.00    1.21
 -14  -3   2    4.60    1.37
 -14  -3   2    4.39    0.92
 -14   3   2    4.39    1.29
 -13  -3   2   77.19    1.17
 -13   3   2   76.26    1.37
 -12  -3   2    0.78    1.29
 -12  -3   2    0.15    0.79
 -11  -3   2   26.44    1.62
 -10  -3   2   51.82    1.87
 -10  -3   2   51.92    1.50
  10  -3  -2   52.79    3.87
  10   3  -2   49.94    2.08
  -9  -3   2  148.93    3.54
  -9  -3   2  151.92    3.21
   9  -3  -2  149.89    5.54
   9   3  -2  152.93    4.29
  -9   3   2  151.01    3.29
   8  -3  -2   49.99    4.08
  -8  -3   2   48.18    2.29
  -8   3   2   47.97    1.92
   8   3  -2   48.01    2.83
  -7  -3   2  279.05    4.54
   7  -3  -2  282.59    6.25
   7   3  -2  280.12    4.83
   7   3  -2  280.48    5.12
   6  -3  -2  333.03   10.08
  -6  -3   2  329.07    8.70
   6   3  -2  334.38    8.99
   6   3  -2  333.05    9.08
  -6   3   2  334.42    8.74
  -5  -3   2  186.07    4.12
   5  -3  -2  189.46    3.83
  -5  -3   2  188.15    4.37
   5  -3  -2  186.24    5.12
  -5   3   2  187.97    3.87
   5   3  -2  188.49    4.08
   5   3  -2  191.40    4.16
  -5   3   2  188.05    5.66
   4  -3  -2   11.67    1.00
   4  -3  -2   12.15    1.00
  -4  -3   2   11.50    1.46
   4  -3  -2   12.13    2.46
  -4   3   2   11.45    1.04
   4   3  -2   11.75    1.17
   3  -3  -2  125.46    4.00
   3  -3  -2  127.63    4.96
  -3  -3   2  123.40    4.29
  -3  -3   2  124.94    4.12
  -3   3   2  126.51    4.08
   3   3  -2  124.54    4.08
  -2  -3   2  154.22    2.08
  -2  -3   2  157.59    1.96
  -2  -3   2  156.62    1.62
   2  -3  -2  156.35    2.42
   2  -3  -2  155.31    1.54
   2  -3  -2  155.29    1.67
  -2   3   2  156.11    2.54
  -2   3   2  153.78    1.67
   1  -3  -2  180.60    6.12
  -1  -3   2  179.97    5.83
  -1  -3   2  177.19    6.00
  -1   3   2  179.21    6.16
   1   3  -2  177.02    5.91
  -1   3   2  174.39    5.70
   0  -3  -2  524.70    2.21
   0  -3  -2  526.83    2.37
   0   3   2  522.87    2.21
   0   3  -2  520.51    2.75
   1  -3   2   17.13    1.21
  -1  -3  -2   17.72    0.58
  -1  -3  -2   16.73    0.37
   1   3   2   17.72    0.54
  -1   3  -2   17.74    1.33
   1   3   2   16.52    0.46
   2  -3   2  124.77    3.79
  -2  -3  -2  127.82    3.04
  -2   3  -2  127.68    3.87
   2   3   2  128.69    2.79
   3  -3   2   50.28    0.58
  -3  -3  -2   51.00    0.96
  -3   3  -2   49.94    2.21
   3   3   2   51.10    1.00
  -4  -3  -2    1.06    1.17
   4  -3   2    1.06    1.96
   4  -3   2    1.10    0.33
   4  -3   2    1.04    0.33
  -4   3  -2    1.08    0.37
   4   3   2    1.06    0.87
  -5  -3  -2   16.08    1.50
  -5  -3  -2   17.20    1.96
   5  -3   2   14.53    2.71
  -5  -3  -2   15.71    1.00
   5   3   2   16.67    1.75
   5   3   2   15.85    1.54
  -5   3  -2   17.41    3.21
   6  -3   2  179.79    4.54
  -6  -3  -2  181.29    2.66
  -6   3  -2  182.72    2.75
   6   3   2  181.44    3.46
   6   3   2  182.77    3.08
  -7  -3  -2   88.75    2.00
   7  -3   2   89.08    1.46
  -7  -3  -2   89.68    1.62
  -7   3  -2   90.33    1.75
   7   3   2   92.14    2.79
  -8  -3  -2   86.00    1.87
  -8   3  -2   86.62    1.62
   9  -3   2   79.62    5.04
   9   3   2   81.70    3.96
  10  -3   2   55.95    4.50
 -10  -3  -2   53.55    1.96
 -10  -3  -2   55.00    1.67
  10  -3   2   52.77    1.58
 -10   3  -2   54.85    1.87
 -11  -3  -2    2.39    0.75
  11  -3   2    5.11    4.00
  11   3   2    1.32    2.75
  12  -3   2   70.64    1.67
 -13  -3  -2   23.26    1.00
  13  -3   2   23.64    0.96
  13  -3   2   22.73    4.37
  13   3   2   24.61    3.41
 -13   3  -2   23.87    1.17
 -14  -3  -2    3.11    1.04
  14  -3   2    6.21    4.83
 -14   3  -2    2.22    1.21
  14   3   2    2.22    3.71
 -15  -3  -2    0.81    1.08
 -15  -3  -2    1.57    1.33
  15  -3   2    0.83    5.12
  15   3   2    0.05    3.75
  16  -3   2   21.50    5.95
 -16  -3  -2   19.19    1.58
 -16  -3  -2   17.69    1.29
  16   3   2   14.84    5.41
 -17  -3  -2   48.81    1.96
  17  -3   2   47.08    6.37
  17   3   2   49.05    5.50
  18  -3   2    0.08    6.66
 -18  -3  -2    1.77    1.46
  18   3   2    1.98    5.33
 -19  -3  -2    1.05    1.67
  19  -3   2    1.66    7.41
  19   3   2    4.59    5.66
 -19   3  -2    1.05    1.83
  20  -3   2    0.29    7.99
 -20  -4   2    0.34    2.17
  20  -4  -2    0.34    7.20
  19  -4  -2    1.43    7.25
 -19  -4   2    1.33    1.46
  18  -4  -2    0.47    6.08
  18   4  -2    0.47    4.00
  17  -4  -2   20.70    6.70
 -17  -4   2   18.74    1.92
  17   4  -2   18.96    3.83
 -16  -4   2   11.38    1.62
  16  -4  -2   11.09    5.16
 -16  -4   2   12.44    1.21
 -16   4   2    9.95    1.50
  16   4  -2   14.92    3.54
 -15  -4   2   10.05    1.00
  15  -4  -2   14.15    5.12
 -15  -4   2   11.27    1.67
  15   4  -2   12.34    2.96
 -14  -4   2    1.26    1.67
 -14  -4   2    1.26    1.00
  14  -4  -2    1.98    4.96
  14   4  -2    1.51    2.79
  13  -4  -2   19.06    4.16
 -13  -4   2   20.50    1.00
  13   4  -2   19.23    2.46
 -12  -4   2    0.82    0.79
 -12  -4   2    0.48    1.50
  12   4  -2    1.30    2.12
 -11  -4   2  103.19    2.62
  11  -4  -2  105.02    7.08
 -10  -4   2    0.35    0.67
 -10  -4   2    0.64    1.42
  10  -4  -2    2.43    3.29
 -10   4   2    0.35    0.83
  10   4  -2    0.35    1.71
  -9  -4   2   94.39    2.25
  -9  -4   2   93.46    2.79
   9  -4  -2   95.00    4.79
  -9   4   2   95.89    2.42
   8  -4  -2   87.04    4.21
  -8  -4   2   86.28    3.37
  -8  -4   2   86.50    1.92
  -8   4   2   87.65    2.00
   8   4  -2   88.64    2.46
  -7  -4   2    2.45    1.71
  -7  -4   2    1.97    1.17
   7  -4  -2    1.96    2.25
   7   4  -2    1.82    0.96
  -7   4   2    1.04    0.50
   6  -4  -2  224.10    7.20
  -6  -4   2  223.91    5.95
  -6  -4   2  227.05    6.16
   6   4  -2  223.23    5.75
  -6   4   2  228.10    5.62
   6   4  -2  227.15    5.95
  -5  -4   2   41.73    2.62
   5  -4  -2   41.59    2.17
   5  -4  -2   43.86    4.00
   5   4  -2   41.95    2.66
  -5   4   2   43.36    2.25
  -4  -4   2  165.92    3.96
  -4  -4   2  166.00    3.75
   4   4  -2  168.74    4.00
  -4   4   2  165.64    3.62
   4   4  -2  165.83    3.62
  -4   4   2  170.01    5.25
  -3  -4   2  284.14    5.45
  -3  -4   2  283.77    5.20
   3  -4  -2  285.30    6.29
   3   4  -2  285.26    5.50
  -3   4   2  281.43    5.25
  -2  -4   2 1662.03   32.15
   2  -4  -2 1683.56   32.60
  -2  -4   2 1654.84   31.90
  -2  -4   2 1673.93   32.15
   1  -4  -2  658.42   17.57
  -1  -4   2  651.87   17.53
  -1   4   2  664.47   17.70
   0  -4  -2  132.47    4.25
   0   4   2  132.49    4.04
  -1  -4  -2    8.89    1.54
  -1   4  -2    8.79    2.87
  -2   4  -2  463.30    5.91
   2   4   2  466.36    5.00
   3  -4   2   80.60    1.00
   3  -4   2   82.07    2.66
  -3  -4  -2   79.06    1.50
   3   4   2   78.99    1.37
  -4  -4  -2  183.59    2.37
   4  -4   2  181.42    3.66
   4   4   2  184.45    2.08
   5  -4   2  137.80    7.00
  -5  -4  -2  137.34    5.75
   5   4   2  132.58    5.79
  -6  -4  -2    4.53    1.37
   6  -4   2    3.51    2.79
  -6   4  -2    3.33    0.75
   6   4   2    3.51    1.46
  -7  -4  -2   74.94    1.54
  -7  -4  -2   75.40    2.04
   7  -4   2   75.45    3.91
  -7  -4  -2   77.85    2.91
   7   4   2   76.65    2.46
   8  -4   2   25.24    4.04
  -8  -4  -2   28.19    2.21
  -8   4  -2   26.80    1.71
   8   4   2   28.23    2.66
  -9  -4  -2   34.63    1.58
   9  -4   2   33.69    0.87
   9  -4   2   33.05    3.71
  -9   4  -2   33.41    1.04
 -10  -4  -2   16.91    0.96
  10  -4   2   17.19    3.71
  10  -4   2   16.26    0.92
 -10   4  -2   16.37    1.08
 -11  -4  -2   50.21    2.00
  11  -4   2   48.90    1.33
  11   4   2   50.88    3.21
 -12  -4  -2   21.65    1.00
  12  -4   2   20.75    4.21
 -12  -4  -2   22.71    1.62
  12   4   2   22.27    3.04
 -12   4  -2   21.07    1.17
 -13  -4  -2   45.54    1.12
 -14  -4  -2   13.86    1.12
 -14   4  -2   12.32    1.37
  14   4   2   15.50    3.46
 -15  -4  -2    1.13    1.58
 -15  -4  -2    1.41    1.08
 -16  -4  -2    1.01    1.17
  17  -4   2    1.29    5.95
 -17  -4  -2    1.31    1.33
  18  -4   2    3.35    6.66
 -18  -4  -2    0.97    1.46
 -18   4  -2    0.27    1.67
  19  -4   2    0.17    7.62
  19   4   2    1.35    5.00
 -19   4  -2    0.55    1.79
  19  -5  -2    4.67    7.37
 -19  -5   2    1.40    1.58
 -18  -5   2    4.31    1.33
 -18   5   2    4.31    1.87
  17  -5  -2   11.65    5.91
 -17  -5   2    8.63    1.17
 -17  -5   2    8.63    1.92
  17   5  -2    8.63    3.37
 -16  -5   2    2.39    2.04
  16  -5  -2    2.39    5.91
 -16  -5   2    2.66    1.17
  16   5  -2    2.39    2.75
 -15  -5   2    3.00    2.00
 -15  -5   2    3.23    1.04
  15  -5  -2    2.81    5.08
  15   5  -2    2.58    2.71
  14  -5  -2    4.41    4.71
 -14  -5   2    1.59    0.92
 -14  -5   2    1.89    1.92
  14   5  -2    1.38    2.25
 -13  -5   2   97.71    3.62
  13  -5  -2  101.88    6.95
  13   5  -2   99.73    4.00
 -12  -5   2   22.60    1.08
  12  -5  -2   23.74    4.50
 -12   5   2   21.36    1.33
  12   5  -2   24.06    2.12
 -11  -5   2    5.96    4.16
  11  -5  -2    3.49    3.91
 -10  -5   2  186.55    6.04
  10  -5  -2  182.97    6.45
  10   5  -2  185.52    4.46
 -10   5   2  187.42    4.16
  -9  -5   2  118.42    3.41
  -9  -5   2  120.67    4.91
   9   5  -2  116.18    3.71
  -9   5   2  120.75    3.50
   7  -5  -2  222.55    5.66
   7  -5  -2  221.63    3.37
  -7  -5   2  225.27    4.29
   7   5  -2  221.23    3.62
   6  -5  -2   33.84    3.66
  -6  -5   2   32.58    2.17
  -6  -5   2   31.99    2.25
   6   5  -2   31.76    1.58
  -6   5   2   32.98    1.62
  -5  -5   2  958.62   17.20
   5  -5  -2  950.93   17.07
   5   5  -2  964.80   17.03
  -4  -5   2  374.26    7.08
  -4  -5   2  375.94    7.25
   4   5  -2  374.21    7.45
  -3  -5   2  100.72    3.21
   3  -5  -2   98.60    4.04
  -3  -5   2  102.58    2.75
   3  -5  -2  100.49    2.91
  -3   5   2  100.89    4.50
   3   5  -2  101.10    3.25
  -2  -5   2  166.29    3.04
   2  -5  -2  165.40    3.79
   2  -5  -2  166.38    2.83
   2   5  -2  168.94    3.08
   2   5  -2  167.43    3.16
  -1  -5   2 2020.15   41.93
   1  -5  -2 2038.44   42.10
  -1  -5   2 2015.16   41.76
  -1   5   2 2029.06   41.68
   0  -5  -2    0.13    0.96
   0   5   2    0.25    1.42
   0   5   2    0.12    0.92
   1  -5   2 2720.31   53.76
  -2  -5  -2  160.87    1.37
  -2  -5  -2  159.57    1.79
   2   5   2  160.31    1.67
   3  -5   2  521.26    8.41
   3  -5   2  520.17    9.58
  -3  -5  -2  525.22    8.79
   3   5   2  525.31    8.83
  -3   5  -2  531.02    9.74
  -4  -5  -2    1.24    1.12
   4  -5   2    0.86    2.12
   5  -5   2   35.71    3.41
  -5  -5  -2   34.17    1.96
   6  -5   2  204.49    6.37
   6   5   2  205.25    4.50
  -7  -5  -2   60.15    1.92
  -7  -5  -2   59.90    2.66
   7  -5   2   62.61    4.58
  -7   5  -2   59.47    2.00
   7   5   2   59.50    2.29
  -8   5  -2  170.01    3.79
   9  -5   2    7.34    3.04
  -9  -5  -2   10.48    0.71
  -9  -5  -2   11.15    1.46
   9   5   2   10.75    1.67
  10  -5   2    1.21    4.08
 -10  -5  -2    0.92    1.50
  10   5   2    1.53    1.92
 -11  -5  -2   35.26    1.08
  11  -5   2   34.49    1.08
 -11   5  -2   36.51    1.37
  12  -5   2   23.81    4.12
 -12  -5  -2   23.44    0.92
  12   5   2   22.97    2.42
 -12   5  -2   22.09    1.21
  13  -5   2  125.28    7.20
 -13  -5  -2  128.06    3.79
  13   5   2  125.13    4.75
 -14  -5  -2    1.22    0.92
  14  -5   2    0.48    4.96
  14   5   2    0.48    2.75
  15  -5   2   13.52    6.00
 -15  -5  -2   10.83    1.17
 -15  -5  -2   11.10    1.83
  15   5   2   11.44    3.21
  16  -5   2    3.44    5.95
 -16  -5  -2    1.52    1.87
 -16  -5  -2    2.55    1.21
 -16   5  -2    1.98    1.58
  16   5   2    2.34    3.41
 -17  -5  -2   15.01    2.25
  17  -5   2   14.73    6.37
 -17  -5  -2   14.61    1.42
 -17   5  -2   14.78    2.04
  17   5   2   17.16    3.83
 -18  -5  -2    0.28    1.42
  18  -5   2    1.86    6.45
  18   5   2    0.45    6.87
 -19   5  -2   14.00    1.92
 -19  -6   2    1.74    1.58
 -19   6   2    1.17    2.00
  18  -6  -2    6.91    7.29
 -18  -6   2    5.55    1.42
 -18   6   2    4.54    2.00
 -17  -6   2    0.28    2.42
  16  -6  -2   16.58    5.54
  16   6  -2   16.22    2.66
 -15  -6   2    7.70    1.12
  15   6  -2    6.18    2.21
 -15   6   2    5.44    1.50
 -14  -6   2    0.47    1.00
 -14  -6   2    2.34    1.96
  14   6  -2    1.31    2.04
 -13  -6   2   28.32    1.17
 -13  -6   2   27.88    2.17
  13   6  -2   27.90    2.04
  12  -6  -2    1.75    4.00
 -12  -6   2    2.09    0.92
 -12  -6   2    1.77    1.87
 -12   6   2    1.75    1.12
 -11  -6   2   78.45    3.71
 -11   6   2   82.98    3.16
 -10  -6   2   59.51    2.54
  10   6  -2   58.58    2.00
  -9  -6   2  506.13    9.29
   9  -6  -2  506.43   11.62
  -9   6   2  508.64    9.37
   8  -6  -2   49.12    1.46
   8  -6  -2   52.38    4.62
   8  -6  -2   48.89    1.33
  -8  -6   2   50.03    2.54
   7  -6  -2  113.98    2.12
  -7  -6   2  113.93    2.96
   7   6  -2  117.16    2.21
  -6  -6   2   48.36    2.54
   6  -6  -2   50.38    4.12
   6  -6  -2   48.44    2.21
  -6  -6   2   49.20    2.83
   5  -6  -2  540.81    9.91
  -5  -6   2  541.88    8.83
  -5  -6   2  545.82    8.45
   4  -6  -2  207.70    5.25
  -4  -6   2  208.82    3.83
  -4  -6   2  208.88    4.21
  -3  -6   2  185.75    3.41
   3  -6  -2  186.15    3.04
  -3   6   2  188.04    4.83
  -3   6   2  189.08    3.08
  -2  -6   2  184.19    4.16
   2  -6  -2  186.12    4.66
   2  -6  -2  184.33    3.75
  -2  -6   2  183.95    3.91
  -2   6   2  185.47    3.79
   2   6  -2  188.42    4.12
   1  -6  -2  297.04    7.29
  -1  -6   2  295.65    6.83
  -1   6   2  294.07    6.66
   1   6  -2  292.55    7.16
   0  -6  -2  349.84   10.87
   0  -6   2  346.63   11.03
   0  -6   2  345.69   10.62
   0   6  -2  351.73   11.20
   0   6   2  352.83   10.58
  -1  -6  -2   50.71    1.87
   1  -6   2   49.34    2.79
  -1   6  -2   51.30    3.00
   1   6   2   51.93    1.92
  -2  -6  -2  752.50   14.28
   2  -6   2  760.54   15.28
   2   6   2  767.81   14.49
  -3  -6  -2  197.82    3.46
   3  -6   2  200.20    5.29
  -3  -6  -2  195.46    4.08
   3   6   2  196.87    3.66
  -4  -6  -2   75.44    2.12
   4  -6   2   74.12    1.83
   4  -6   2   77.04    3.66
  -5  -6  -2   62.19    2.04
   5  -6   2   61.83    3.46
  -6  -6  -2   24.62    1.92
   6  -6   2   25.18    3.25
   7  -6   2  134.07    1.96
   7   6   2  133.42    2.00
  -7   6  -2  133.88    2.25
  -8  -6  -2    3.70    1.46
   8  -6   2    4.67    0.50
   8  -6   2    6.65    3.16
   8   6   2    4.64    0.87
  -9  -6  -2   61.56    3.58
  -9  -6  -2   60.89    3.37
   9  -6   2   60.87    6.00
  -9  -6  -2   63.23    2.58
 -10  -6  -2  135.36    4.75
  10  -6   2  132.60    3.12
  10  -6   2  132.56    7.83
 -10   6  -2  133.17    3.62
  11  -6   2    6.70    0.67
 -11  -6  -2    6.97    0.83
  11  -6   2    6.40    3.66
 -11  -6  -2    7.80    1.87
  11   6   2    6.40    1.62
 -11   6  -2    6.38    1.04
 -12  -6  -2    2.18    0.92
 -12  -6  -2    2.24    1.79
  12  -6   2    2.22    4.33
  12   6   2    2.64    1.96
 -12   6  -2    1.95    1.08
 -13  -6  -2   15.25    0.96
 -14  -6  -2    3.05    2.29
  14  -6   2    3.83    4.87
 -14  -6  -2    2.44    1.00
  14   6   2    2.59    2.42
 -15  -6  -2    6.32    1.21
 -15  -6  -2    5.05    2.66
  15  -6   2    4.42    5.45
  15   6   2    6.11    2.71
  16  -6   2    7.33    6.12
 -16  -6  -2    2.51    2.21
 -16  -6  -2    2.70    1.17
 -17  -6  -2    2.93    2.08
  17  -6   2    2.74    6.29
  17   6   2    2.93    3.29
 -17   6  -2    2.76    1.79
 -18  -6  -2    6.38    2.33
 -18  -6  -2    7.69    1.50
  18  -6   2    7.29    7.45
 -18   6  -2    7.83    1.96
 -19  -6  -2    0.41    1.54
  19  -6   2    0.41    7.41
 -19   6  -2    0.41    2.00
 -19  -7   2    0.24    1.62
  19  -7  -2    2.83    7.62
 -19   7   2    0.24    2.25
 -18  -7   2    7.53    1.42
  17  -7  -2    5.30    6.79
 -17  -7   2    3.66    1.37
 -16  -7   2    0.21    2.46
  16  -7  -2    2.59    5.50
 -16  -7   2    0.78    1.25
  16   7  -2    0.74    2.25
  15  -7  -2    1.59    5.12
 -15  -7   2    1.69    1.12
  15   7  -2    3.00    2.00
 -14  -7   2    1.58    0.96
  14  -7  -2    1.01    4.58
  14   7  -2    2.02    1.83
 -14   7   2    1.01    1.33
 -13  -7   2    5.60    2.42
 -13   7   2    5.51    1.37
  13   7  -2    5.64    1.67
 -11  -7   2  148.46    3.16
 -11  -7   2  150.84    4.00
 -11   7   2  150.52    3.46
  11   7  -2  148.21    3.25
  10  -7  -2    0.19    3.54
 -10  -7   2    1.14    1.79
 -10   7   2    0.67    0.83
  10   7  -2    1.05    1.00
   9  -7  -2    1.92    3.83
  -9  -7   2    3.06    1.83
   9  -7  -2    3.67    0.33
  -9  -7   2    4.42    2.21
  -9   7   2    2.99    0.87
   9   7  -2    2.72    0.92
   8  -7  -2   11.42    0.79
  -8  -7   2   11.76    1.71
  -8  -7   2   11.42    1.67
  -8   7   2   11.26    0.71
   8   7  -2   11.11    0.83
   7  -7  -2  230.58    4.71
  -6  -7   2   22.99    1.00
   6  -7  -2   23.72    0.96
   6  -7  -2   24.38    2.79
  -6  -7   2   24.08    1.54
  -6  -7   2   24.53    1.21
  -5  -7   2  143.78    3.83
  -5  -7   2  145.93    4.58
   5  -7  -2  142.41    4.04
   5  -7  -2  146.20    5.83
  -5  -7   2  145.13    4.16
  -4  -7   2  315.76    4.87
   4  -7  -2  317.36    5.95
  -4  -7   2  320.82    4.21
  -4   7   2  320.34    4.58
  -3  -7   2   88.56    3.25
  -3  -7   2   89.40    3.21
   3   7  -2   88.33    3.00
  -2  -7   2   98.53    2.87
   2  -7  -2   95.09    3.33
  -2   7   2   97.62    2.37
  -2   7   2   99.54    3.96
  -1  -7   2  222.99    3.33
   1  -7  -2  224.38    3.41
  -1  -7   2  220.27    2.71
  -1   7   2  220.48    2.71
   0  -7   2   74.14    2.46
   0  -7   2   73.54    1.71
   0  -7  -2   73.69    2.12
   0   7   2   72.18    1.71
  -1  -7  -2  153.46    3.46
  -1   7  -2  154.74    4.58
   1   7   2  152.74    3.66
   2  -7   2    6.32    2.29
  -2  -7  -2    6.17    1.21
   2  -7   2    5.87    1.17
   2   7   2    6.82    1.33
  -3  -7  -2  997.72   21.03
   3  -7   2  996.50   21.36
   4  -7   2   53.31    3.91
  -4  -7  -2   54.68    2.46
   4  -7   2   53.94    2.25
   5  -7   2  197.65    4.87
  -5  -7  -2  203.95    3.33
   5  -7   2  201.02    2.96
   6  -7   2  249.94    6.91
   6  -7   2  249.73    4.79
  -6  -7  -2  248.74    5.16
   7  -7   2   18.38    3.87
  -7  -7  -2   18.64    2.17
   7  -7   2   19.69    1.54
   8  -7   2   72.31    4.58
   9  -7   2  127.34    7.12
  -9  -7  -2  124.64    2.37
  -9  -7  -2  125.34    3.33
 -10  -7  -2    1.99    0.79
 -10  -7  -2    3.02    1.75
  10  -7   2    1.54    1.04
  10  -7   2    1.29    0.50
 -10   7  -2    1.75    0.87
  10   7   2    1.29    0.87
 -11  -7  -2    0.13    2.04
  11  -7   2    0.22    0.62
  11  -7   2    0.81    3.75
 -11  -7  -2    0.55    0.92
 -11   7  -2    0.11    1.04
  11   7   2    0.53    1.25
 -12  -7  -2   10.81    2.54
 -12  -7  -2   10.26    2.83
 -12  -7  -2    8.01    1.04
 -12   7  -2    7.56    1.33
  12   7   2    8.43    1.58
  13  -7   2    4.10    4.83
 -13   7  -2    4.10    1.21
  14  -7   2    7.44    5.66
 -14   7  -2    7.44    1.29
  14   7   2    7.61    1.87
  15  -7   2    5.28    5.83
 -15  -7  -2    5.53    1.12
 -15  -7  -2    6.99    2.33
  16  -7   2    2.13    5.70
 -16  -7  -2    4.26    2.54
 -16   7  -2    2.13    1.71
  17  -7   2    4.44    6.16
 -17  -7  -2    1.49    2.58
 -17  -7  -2    1.49    1.37
 -18  -7  -2    1.13    1.46
 -18  -7  -2    0.37    2.50
  18  -7   2    4.76    7.25
 -19  -7  -2    0.91    1.71
  19  -8  -2   15.90    7.29
 -19   8   2   12.70    2.58
 -18  -8   2    3.20    1.54
  18  -8  -2    1.85    6.66
  17  -8  -2    5.36    6.62
 -17   8   2    5.36    1.87
 -16  -8   2    1.68    2.83
  16  -8  -2    0.84    5.87
 -16  -8   2    1.68    1.29
 -15  -8   2   30.27    1.37
  14   8  -2   18.66    1.79
 -14   8   2   17.47    1.46
 -13  -8   2   19.22    1.21
  13  -8  -2   18.41    5.04
 -13  -8   2   19.68    2.66
 -13   8   2   18.18    1.54
  12  -8  -2  114.02    5.62
 -12  -8   2  117.22    3.71
  12   8  -2  115.43    2.29
  11  -8  -2    7.72    4.04
 -11  -8   2    6.77    0.96
 -11  -8   2    6.98    2.37
  10  -8  -2   99.37    5.83
 -10  -8   2   95.68    3.41
  10   8  -2   95.51    2.29
 -10   8   2   92.71    2.50
   9  -8  -2   52.39    2.04
  -9  -8   2   52.05    3.16
  -9  -8   2   53.19    2.50
   9  -8  -2   52.91    5.12
  -8  -8   2  365.32    5.83
   8  -8  -2  367.32    5.08
  -7  -8   2   71.73    3.08
   7  -8  -2   73.27    2.17
  -6  -8   2   10.00    1.96
   6  -8  -2   11.96    1.33
  -5  -8   2  160.88    3.12
   5  -8  -2  157.91    3.08
  -5  -8   2  161.11    3.75
   5  -8  -2  155.93    4.91
  -5  -8   2  159.89    2.71
   4  -8  -2   46.17    1.29
   4  -8  -2   48.11    2.83
  -4  -8   2   45.39    0.87
  -4  -8   2   45.56    1.67
  -3  -8   2   46.33    2.25
  -3  -8   2   42.50    2.04
   3   8  -2   46.14    2.00
   2  -8  -2    7.48    2.08
  -2  -8   2    7.94    1.75
   2  -8  -2    8.28    1.17
   2   8  -2    7.79    1.92
  -1  -8   2   11.74    1.83
  -1  -8   2   10.95    1.33
  -1   8   2   10.97    2.17
   1   8  -2   13.68    2.12
   0  -8  -2   47.15    1.79
   0  -8   2   47.11    1.75
   0  -8   2   47.09    2.62
   0  -8  -2   47.44    2.29
   0   8   2   49.97    2.75
   0   8  -2   48.29    2.96
   1  -8   2   15.57    3.12
   1   8   2   16.52    2.71
  -2  -8  -2   36.77    1.67
   2  -8   2   35.55    1.67
   2  -8   2   35.40    2.83
  -2  -8  -2   35.17    1.67
  -3  -8  -2   64.00    1.71
   3  -8   2   61.29    2.25
  -3  -8  -2   61.96    2.37
   3  -8   2   63.92    3.87
   3   8   2   64.26    2.46
   4  -8   2   25.41    2.58
  -4  -8  -2   23.69    1.25
   5  -8   2  154.20    4.79
   5  -8   2  152.83    2.75
  -5  -8  -2  151.51    3.00
  -6  -8  -2  135.95    3.21
   6  -8   2  136.75    2.62
  -7  -8  -2   91.21    3.00
   7  -8   2   93.86    2.46
   7  -8   2   97.15    4.96
  -8  -8  -2   61.81    2.58
   8  -8   2   60.55    4.79
   8  -8   2   65.25    2.04
  -9  -8  -2   39.79    2.46
   9  -8   2   41.71    4.96
   9  -8   2   38.76    1.67
   9  -8   2   38.95    1.17
  10  -8   2   10.40    3.83
 -10  -8  -2   11.75    2.25
 -10  -8  -2   10.29    0.87
  10  -8   2   10.17    0.58
  11  -8   2   82.78    2.00
  11  -8   2   80.86    2.42
  12  -8   2   36.39    5.08
 -12  -8  -2   36.17    2.58
  12  -8   2   36.39    0.87
  12  -8   2   37.12    1.21
 -13  -8  -2   17.09    1.33
  13   8   2   15.72    1.50
 -13   8  -2   15.17    1.54
 -14  -8  -2   51.57    1.67
 -14  -8  -2   51.05    3.16
  14   8   2   49.51    1.96
 -15  -8  -2    2.83    2.71
 -15  -8  -2    2.66    1.21
 -15   8  -2    1.56    1.46
  16  -8   2   17.10    5.87
 -16  -8  -2   17.16    2.83
 -17  -8  -2    6.14    2.87
 -17  -8  -2    7.05    1.46
 -17   8  -2    6.44    1.71
  18  -8   2    2.62    8.24
  19  -8   2   32.47    8.95
  18  -9  -2    1.85    7.29
 -18  -9   2    1.85    1.46
  17  -9  -2    7.77    6.70
 -17  -9   2    4.86    1.42
 -16  -9   2   22.57    1.58
  16  -9  -2   23.14    6.16
 -16   9   2   22.59    2.12
 -15  -9   2   37.91    3.04
 -15  -9   2   39.34    1.42
 -15   9   2   37.30    1.75
 -14  -9   2    2.42    2.83
 -14   9   2    1.93    1.37
 -13  -9   2    2.32    2.50
 -13  -9   2    2.32    1.08
 -13   9   2    2.53    1.25
  12  -9  -2   10.68    4.54
 -12  -9   2    9.86    2.75
 -12  -9   2    8.17    1.08
  11  -9  -2    1.48    4.25
 -11  -9   2    1.46    0.96
  10  -9  -2   22.70    4.16
  10  -9  -2   23.52    1.08
   9  -9  -2   68.00    5.41
   9  -9  -2   66.49    2.00
  -9  -9   2   65.16    3.25
   8  -9  -2  242.69    6.79
  -8  -9   2  243.60    4.83
   8  -9  -2  238.79    3.83
   7  -9  -2   55.04    1.96
  -7  -9   2   57.91    2.91
   6  -9  -2   99.49    2.12
  -6  -9   2  100.56    2.83
  -5  -9   2    7.12    1.71
   5  -9  -2    8.87    1.17
  -5  -9   2    8.20    0.62
   5  -9  -2    8.62    3.12
  -5  -9   2    9.65    1.33
  -4  -9   2  145.50    3.46
   4  -9  -2  147.69    3.12
  -4  -9   2  146.58    3.41
  -3  -9   2   54.16    2.37
  -3  -9   2   53.40    2.17
   3  -9  -2   53.78    3.00
   3   9  -2   54.26    2.17
   2  -9  -2   96.79    2.29
   2  -9  -2   96.55    3.54
   1  -9  -2   38.85    3.04
  -1  -9   2   36.05    2.71
  -1  -9   2   37.50    2.08
   1   9  -2   38.81    3.08
   0  -9  -2  102.82    4.25
   0  -9   2  106.85    3.79
   0  -9  -2  102.25    3.54
   0  -9   2  104.17    4.62
   0   9   2  105.29    4.79
   1  -9   2   51.18    2.71
  -1  -9  -2   53.39    2.08
  -2  -9  -2   12.22    2.08
  -2  -9  -2   12.69    2.04
   2  -9   2   14.08    2.08
   2   9   2   14.48    2.42
   3  -9   2  130.73    4.21
   3  -9   2  133.59    2.83
  -3  -9  -2  129.87    2.37
   4  -9   2   83.02    2.96
  -4  -9  -2   80.91    3.21
   4  -9   2   82.16    4.87
   4   9   2   82.94    2.37
   5  -9   2    1.77    1.29
   5  -9   2    2.34    3.12
  -5  -9  -2    1.72    1.58
   6  -9   2   14.43    1.29
  -6  -9  -2   14.32    1.58
   6  -9   2   17.40    3.37
   7  -9   2   58.19    2.37
  -7  -9  -2   56.84    2.79
   8  -9   2  176.14    3.79
   8  -9   2  168.27    6.29
  -8  -9  -2  171.15    4.54
   9  -9   2   11.17    4.25
   9  -9   2   11.74    1.50
  -9  -9  -2   12.40    2.50
   9  -9   2   14.17    1.00
 -10  -9  -2   88.38    3.58
  11  -9   2  104.87    2.21
 -11  -9  -2  104.78    2.87
  11  -9   2  105.05    7.00
 -11  -9  -2  105.14    4.00
  12  -9   2    3.87    0.71
  12  -9   2    6.33    4.75
 -12  -9  -2    2.92    2.37
  12  -9   2    2.92    1.21
  13  -9   2    6.99    5.37
 -13  -9  -2    8.06    1.17
  14  -9   2   14.19    5.66
 -14  -9  -2   16.32    3.00
 -15  -9  -2    4.57    2.91
  15  -9   2    7.88    6.08
 -15  -9  -2    4.77    1.21
 -16  -9  -2    3.21    1.33
  16  -9   2    6.20    5.66
 -17  -9  -2    1.08    1.37
 -17  -9  -2    0.41    3.29
  17  -9   2    2.66    6.75
 -17   9  -2    0.39    1.79
 -18  -9  -2   14.13    3.12
  18  -9   2   16.07    8.54
 -18   9  -2   14.72    2.08
  18 -10  -2    3.58    6.75
 -18 -10   2    4.53    1.62
 -18 -10   2    2.21    3.75
 -17 -10   2    0.22    3.37
  17 -10  -2    1.44    7.04
 -17 -10   2    0.22    1.54
 -16 -10   2    1.11    3.25
 -16 -10   2    1.38    1.33
  16 -10  -2    1.61    6.62
  15 -10  -2    7.14    5.62
 -15 -10   2    7.01    3.33
 -15 -10   2    4.31    1.42
  14 -10  -2    2.04    5.83
 -14 -10   2    0.50    1.29
 -13 -10   2    1.55    1.21
 -13 -10   2    0.54    2.83
  13 -10  -2    1.32    5.00
  11 -10  -2   14.10    5.00
  11 -10  -2   10.16    0.67
 -10 -10   2   16.13    2.46
  -9 -10   2    0.27    2.21
   9 -10  -2    0.17    1.25
   9 -10  -2    0.25    4.00
   8 -10  -2   24.35    1.96
   7 -10  -2    0.24    1.25
  -7 -10   2    0.24    2.08
   6 -10  -2    7.27    4.25
   6 -10  -2    5.67    1.67
  -5 -10   2   65.21    2.25
   5 -10  -2   66.33    4.21
   5 -10  -2   63.55    1.96
  -5 -10   2   64.79    1.29
   4 -10  -2   68.39    2.50
  -4 -10   2   65.12    2.96
  -3 -10   2   42.21    2.75
   3 -10  -2   41.64    3.66
   3  10  -2   41.20    2.54
   2 -10  -2  200.20    6.20
   2 -10  -2  204.62    5.04
  -2 -10   2  201.19    5.20
  -2 -10   2  206.73    5.83
   1 -10  -2  515.38    9.20
   1 -10  -2  511.21    8.37
  -1 -10   2  515.95    9.20
  -1 -10   2  519.60    8.62
   1  10  -2  522.93    9.37
   0 -10   2    3.29    1.83
   0 -10   2    2.74    2.50
   0 -10  -2    2.83    2.21
  -1 -10  -2   50.83    3.50
  -1 -10  -2   52.78    3.29
   1 -10   2   50.82    3.12
  -2 -10  -2  674.13   11.37
   2 -10   2  669.73   12.45
   3 -10   2   15.61    2.58
  -3 -10  -2   13.33    2.71
  -3 -10  -2   16.68    2.25
   3 -10   2   15.69    4.33
  -4 -10  -2   48.47    1.42
  -4 -10  -2   47.39    2.54
   4 -10   2   48.63    4.41
   4  10   2   47.26    2.17
   5 -10   2  263.33    5.75
  -5 -10  -2  261.24    4.37
   5 -10   2  257.30    3.91
  -6 -10  -2    6.99    1.79
   6 -10   2    6.86    3.75
  -7 -10  -2  112.27    4.00
   7 -10   2  113.34    3.33
   7 -10   2  112.44    7.79
  -8 -10  -2   57.69    2.96
   8 -10   2   56.34    4.66
   8 -10   2   59.23    2.08
  -9 -10  -2  104.89    3.29
   9 -10   2  103.18    2.46
   9 -10   2  103.80    5.62
  10 -10   2   10.22    1.58
  10 -10   2    8.72    4.16
 -11 -10  -2    4.54    1.04
  11 -10   2    6.77    1.50
  11 -10   2    5.97    0.83
 -11 -10  -2    4.79    2.62
  11 -10   2    5.61    4.91
 -12 -10  -2    1.48    1.08
 -12 -10  -2    0.95    2.71
  12 -10   2    1.86    1.42
  13 -10   2    0.14    1.17
 -13 -10  -2    1.15    1.25
  13 -10   2    0.14    5.00
 -14 -10  -2   28.04    1.46
  15 -10   2   13.89    6.20
 -15 -10  -2   10.54    3.29
  16 -10   2   11.63    7.04
 -16 -10  -2    6.83    1.50
 -16 -10  -2    7.84    3.50
 -17 -10  -2    1.94    3.54
  17 -10   2    0.06    6.50
 -17 -10  -2    0.06    1.50
 -18 -10  -2    2.33    3.58
  18 -10   2    3.11    8.08
 -18 -10  -2    3.72    1.75
 -18 -11   2   10.22    2.17
 -17 -11   2    3.87    1.62
  17 -11  -2    2.59    7.08
 -16 -11   2    6.12    3.66
  16 -11  -2    6.79    6.29
 -16 -11   2    4.56    1.42
 -15 -11   2   14.94    1.50
 -15 -11   2   16.54    3.58
 -14 -11   2   64.29    3.58
  14 -11  -2   58.85    6.12
 -14 -11   2   60.45    1.71
 -13 -11   2    2.81    3.29
  13 -11  -2    3.97    5.66
 -12 -11   2    0.46    2.96
  12 -11  -2    0.09    4.58
 -11 -11   2    0.71    2.71
  11 -11  -2    2.86    1.21
  10 -11  -2    1.23    1.37
 -10 -11   2    1.15    2.54
  10 -11  -2    0.11    4.41
  -9 -11   2   33.42    2.75
   9 -11  -2   31.81    4.62
   9 -11  -2   30.82    1.58
   8 -11  -2    0.91    1.37
  -8 -11   2    0.91    2.21
   8 -11  -2    0.91    3.54
  -7 -11   2   28.27    2.75
   7 -11  -2   29.10    2.00
   7 -11  -2   32.04    4.71
   6 -11  -2   47.54    4.79
   6 -11  -2   45.96    2.00
  -5 -11   2   26.35    0.92
  -5 -11   2   28.25    1.75
   4 -11  -2    3.28    3.58
  -4 -11   2    2.97    2.33
  -4 -11   2    3.08    2.37
   4  11  -2    2.17    1.83
  -3 -11   2   33.09    2.71
   3 -11  -2   33.62    3.54
   3 -11  -2   33.87    1.83
  -3 -11   2   35.81    2.50
   3  11  -2   33.28    2.54
   2 -11  -2   17.43    2.83
   2 -11  -2   14.55    1.54
  -2 -11   2   14.54    2.50
   2  11  -2   14.54    2.75
  -1 -11   2    0.31    2.75
   1 -11  -2    0.68    1.62
  -1 -11   2    0.96    1.83
   0 -11  -2    6.86    2.58
   0 -11   2    7.43    2.79
   0 -11  -2    7.83    1.87
  -1 -11  -2   95.68    3.58
   1 -11   2   96.23    4.37
  -1 -11  -2   92.86    2.83
   1 -11   2   93.72    2.96
  -2 -11  -2  162.38    3.87
  -2 -11  -2  159.48    4.04
   2 -11   2  163.61    5.41
   2 -11   2  159.14    3.79
   3 -11   2   30.50    4.04
  -3 -11  -2   32.76    2.25
  -3 -11  -2   33.43    2.12
   3 -11   2   32.33    2.29
  -4 -11  -2   14.64    1.96
  -4 -11  -2   13.61    0.96
   4 -11   2    9.75    3.33
  -5 -11  -2    2.45    2.08
   5 -11   2    2.42    1.58
   6 -11   2  160.63    2.83
  -7 -11  -2    8.79    2.25
   7 -11   2    8.83    1.58
  -8 -11  -2    2.49    2.46
   8 -11   2    3.31    1.67
   9 -11   2   10.30    1.75
  -9 -11  -2    8.95    2.66
   9 -11   2    8.02    4.91
  10 -11   2   22.99    4.83
 -10 -11  -2   27.57    2.62
  10 -11   2   26.20    1.67
 -11 -11  -2    6.08    2.71
  11 -11   2    5.94    1.67
  11 -11   2    7.24    5.37
 -12 -11  -2   40.25    3.16
 -12 -11  -2   39.09    1.50
  12 -11   2   40.16    1.83
 -13 -11  -2    0.36    2.96
  13 -11   2    0.22    5.66
  13 -11   2    1.40    1.87
 -13 -11  -2    0.26    1.21
  14 -11   2    6.81    5.58
 -14 -11  -2    8.88    1.33
 -14 -11  -2    9.96    3.21
 -15 -11  -2   19.05    1.50
 -15 -11  -2   20.42    3.46
  15 -11   2   21.70    7.08
 -16 -11  -2    1.90    1.46
 -16 -11  -2    0.55    3.58
 -17 -11  -2    1.31    1.67
  17 -11   2    0.09    7.25
 -17 -12   2    0.66    4.08
 -16 -12   2    0.53    1.58
  16 -12  -2    0.26    7.12
 -15 -12   2    1.06    1.50
 -14 -12   2    2.89    1.42
  13 -12  -2   47.02    6.29
 -13 -12   2   47.02    3.79
  12 -12  -2    4.07    5.50
  12 -12  -2    1.64    1.12
 -12 -12   2    1.64    3.00
 -11 -12   2    3.12    2.96
  11 -12  -2    2.86    1.50
  11 -12  -2    6.49    5.20
  10 -12  -2    0.87    4.75
  10 -12  -2    0.43    1.58
   9 -12  -2  254.18    3.62
   9 -12  -2  253.32    7.12
   8 -12  -2    0.15    1.54
  -8 -12   2    0.15    2.54
   7 -12  -2   63.70    2.96
  -7 -12   2   64.86    4.16
   6 -12  -2    1.61    1.67
   6 -12  -2    2.62    3.83
  -5 -12   2   55.98    1.08
  -5 -12   2   56.25    2.54
   5 -12  -2   53.40    4.33
   4 -12  -2   13.25    3.33
   4 -12  -2   13.25    1.67
   4  12  -2   15.99    1.96
   3 -12  -2   12.15    2.08
  -3 -12   2    9.35    3.12
   3 -12  -2   11.08    3.79
   3  12  -2   13.22    3.00
  -2 -12   2    2.42    2.25
   2 -12  -2    0.30    1.62
  -2 -12   2    0.30    2.91
   2 -12  -2    0.30    3.00
   2  12  -2    0.30    3.33
   1 -12  -2    2.80    1.83
  -1 -12   2    2.78    3.00
   1 -12  -2    4.46    3.33
  -1 -12   2    3.47    2.04
   0 -12  -2   28.05    3.79
   0 -12  -2   26.12    2.54
   0 -12   2   29.15    2.91
   0 -12   2   26.54    3.96
   1 -12   2   28.14    3.46
  -1 -12  -2   28.96    2.83
  -2 -12  -2   25.46    2.79
   2 -12   2   22.20    4.29
   2 -12   2   23.44    2.37
  -3 -12  -2   11.48    1.79
   3 -12   2   13.46    1.92
  -3 -12  -2   11.23    3.66
  -4 -12  -2    2.20    1.29
   5 -12   2    6.94    4.50
   5 -12   2    6.35    1.87
  -5 -12  -2    5.40    2.21
   6 -12   2    5.23    4.04
  -6 -12  -2    3.65    2.21
   6 -12   2    4.35    1.75
  -7 -12  -2  145.94    3.54
   7 -12   2  150.20    2.87
   7 -12   2  147.80    5.79
   8 -12   2   91.75    2.58
  -8 -12  -2   93.31    3.41
   8 -12   2   91.18    5.95
  -9 -12  -2    0.43    2.33
   9 -12   2    0.43    1.71
 -10 -12  -2    1.99    2.87
 -11 -12  -2   45.25    3.41
  11 -12   2   42.41    5.08
  11 -12   2   45.61    2.17
 -12 -12  -2    0.32    3.08
  12 -12   2    2.07    1.87
 -13 -12  -2   18.38    1.37
  13 -12   2   18.74    5.62
 -13 -12  -2   17.66    3.04
 -14 -12  -2   35.78    3.50
 -14 -12  -2   36.50    1.62
 -15 -12  -2   15.33    3.83
  15 -12   2   13.51    6.62
  17 -12   2    9.59    7.41
 -17 -12  -2   12.31    3.91
 -17 -13   2    3.22    3.00
 -16 -13   2   11.24    4.00
 -14 -13   2    6.98    3.62
  14 -13  -2   13.26    6.66
 -14 -13   2    8.89    1.54
  12 -13  -2  101.50    2.21
 -12 -13   2   99.24    4.04
 -11 -13   2    2.86    3.16
  11 -13  -2    2.97    1.62
  11 -13  -2    5.20    5.04
 -10 -13   2   32.65    3.79
  10 -13  -2   32.52    2.25
  10 -13  -2   31.55    6.08
   9 -13  -2   54.07    2.17
  -9 -13   2   57.40    3.50
   9 -13  -2   51.02    4.75
  -8 -13   2   26.99    3.33
   8 -13  -2   24.86    2.12
  -7 -13   2    8.98    3.12
   7 -13  -2    5.17    4.58
   7 -13  -2    6.36    1.87
   6 -13  -2   78.57    6.91
  -6 -13   2   73.36    4.58
   6 -13  -2   72.18    3.58
   5 -13  -2   93.27    4.79
  -5 -13   2   92.11    1.50
  -5 -13   2   93.19    2.96
   4 -13  -2    0.04    4.29
  -4 -13   2    2.95    2.58
   4 -13  -2    0.55    1.71
  -4 -13   2    2.02    2.87
   4  13  -2    1.49    2.25
   3 -13  -2   89.35    4.66
  -3 -13   2   87.57    3.58
   2 -13  -2   12.59    4.00
  -2 -13   2   14.10    2.66
   1 -13  -2    2.38    2.08
   1 -13  -2    1.73    3.46
  -1 -13   2    0.51    2.12
   0 -13   2    6.75    3.87
   0 -13  -2    6.75    3.33
   0 -13   2    9.72    3.50
  -1 -13  -2    2.94    2.96
   1 -13   2    4.75    3.96
   1 -13   2    2.94    2.08
  -2 -13  -2    5.12    2.37
  -3 -13  -2  173.91    4.29
   3 -13   2  172.01    3.91
  -4 -13  -2    2.96    1.42
   4 -13   2    3.93    1.87
   4  13   2    2.96    2.29
   5 -13   2    3.49    4.41
  -5 -13  -2    4.68    2.33
   6 -13   2    8.42    1.96
   6 -13   2    6.00    4.66
  -7 -13  -2    0.08    2.62
   7 -13   2    1.36    1.92
   7 -13   2    2.06    5.25
   8 -13   2   25.14    2.54
  -8 -13  -2   21.90    3.16
   8 -13   2   23.08    5.58
  -9 -13  -2   61.95    3.54
   9 -13   2   62.43    2.58
  10 -13   2    4.54    1.83
  10 -13   2    3.55    4.71
 -11 -13  -2    3.14    3.04
  11 -13   2    0.74    5.70
 -12 -13  -2   15.69    3.29
  12 -13   2   16.38    2.08
 -13 -13  -2    9.60    3.46
  13 -13   2   12.40    6.66
 -14 -13  -2   46.85    1.62
  14 -13   2   46.11    6.75
 -15 -13  -2    2.90    3.87
 -16 -13  -2    3.01    1.67
 -16 -13  -2    3.73    4.16
 -16 -14   2    2.21    4.50
  16 -14  -2    0.27    7.45
 -16 -14   2    0.88    1.79
  15 -14  -2    0.06    7.00
 -15 -14   2    0.06    1.71
 -14 -14   2   14.34    1.62
  14 -14  -2   13.82    6.58
  13 -14  -2    8.15    6.54
 -13 -14   2    4.39    3.58
  12 -14  -2    0.72    6.12
 -12 -14   2    1.59    3.79
 -11 -14   2    1.49    3.37
  11 -14  -2    1.39    1.83
  11 -14  -2    1.49    5.20
  10 -14  -2   16.15    1.92
 -10 -14   2   19.06    3.33
  10 -14  -2   14.72    5.08
  -9 -14   2    0.90    3.21
   9 -14  -2    0.10    5.70
   9 -14  -2    1.21    2.00
   8 -14  -2   28.92    5.16
   8 -14  -2   27.72    2.29
  -7 -14   2    1.81    2.50
   7 -14  -2    2.04    4.66
  -6 -14   2   18.99    3.16
   6 -14  -2   18.19    4.91
   5 -14  -2    0.37    1.96
  -5 -14   2    2.18    2.46
  -4 -14   2    6.29    2.66
   4 -14  -2    8.33    2.29
   4 -14  -2    7.74    5.33
   3 -14  -2   80.26    2.66
  -3 -14   2   78.03    2.79
  -3 -14   2   80.43    4.12
  -2 -14   2    8.02    4.16
  -2 -14   2    9.16    2.83
  -1 -14   2    3.49    3.96
   1 -14  -2    1.38    4.12
   1 -14  -2    0.96    2.08
   0 -14  -2   92.25    3.50
   0 -14   2   89.59    3.50
   1 -14   2   47.06    4.58
   1 -14   2   49.14    2.42
  -1 -14  -2   50.14    2.54
  -1 -14  -2   50.30    3.83
   2 -14   2   11.96    4.33
  -2 -14  -2    8.90    3.08
  -2 -14  -2   11.11    2.54
   2 -14   2    9.98    2.42
  -3 -14  -2   19.99    2.62
   3 -14   2   15.99    4.87
   4 -14   2    8.36    4.46
   4 -14   2    6.72    2.21
  -4 -14  -2    7.10    1.71
  -4 -14  -2    6.72    2.42
  -5 -14  -2   35.22    2.79
   5 -14   2   38.21    2.62
   5 -14   2   36.19    5.50
   6 -14   2   55.05    2.87
  -6 -14  -2   55.30    3.54
  -7 -14  -2    2.83    3.25
   7 -14   2    0.58    4.29
   7 -14   2    0.92    2.04
   8 -14   2   39.95    2.21
   8 -14   2   37.44    5.45
   9 -14   2   11.86    2.12
   9 -14   2   12.28    5.91
 -10 -14  -2    2.57    3.54
  10 -14   2    1.07    5.33
  11 -14   2   43.65    5.83
 -11 -14  -2   43.69    3.41
 -12 -14  -2   23.51    3.66
  12 -14   2   25.19    2.29
  13 -14   2    7.73    6.04
 -13 -14  -2    6.49    3.71
 -13 -14  -2    5.54    1.46
  14 -14   2    0.08    7.29
 -14 -14  -2    0.17    1.54
 -15 -14  -2    1.01    4.16
 -15 -14  -2    1.43    1.67
  15 -14   2    1.01    7.25
  16 -14   2    0.17    9.20
 -16 -14  -2    0.42    1.75
 -15 -15   2    1.19    1.79
  15 -15  -2    1.97    7.45
 -14 -15   2    5.42    4.41
  14 -15  -2    7.48    6.79
  13 -15  -2    8.96    6.62
 -13 -15   2   13.01    3.96
  12 -15  -2    2.75    6.41
 -12 -15   2    3.41    3.83
  11 -15  -2    2.10    2.08
 -11 -15   2    4.41    4.00
  11 -15  -2    0.77    5.33
  10 -15  -2    2.43    6.00
  10 -15  -2    2.43    2.29
   9 -15  -2    4.01    5.29
  -9 -15   2    5.06    3.41
   9 -15  -2    4.18    2.17
   8 -15  -2   29.07    2.33
  -8 -15   2   27.03    3.29
   7 -15  -2  104.66    6.45
  -7 -15   2  101.48    4.46
   7 -15  -2  102.20    3.41
   6 -15  -2   14.11    2.58
   6 -15  -2   12.42    5.33
  -5 -15   2    4.05    2.71
  -5 -15   2    5.37    2.83
   5 -15  -2    3.90    4.96
  -4 -15   2    0.32    2.66
   4 -15  -2    5.33    4.71
   4 -15  -2    3.37    2.25
   4  15  -2    0.32    2.58
   3 -15  -2   38.51    2.58
  -3 -15   2   35.94    3.12
  -2 -15   2   36.23    2.87
   2 -15  -2   34.66    2.42
  -1 -15   2   80.18    3.54
   1 -15  -2   80.22    3.33
   0 -15   2  123.17    3.71
   0 -15  -2  120.97    3.37
   0 -15   2  123.29    5.79
   0 -15  -2  122.57    5.45
   1 -15   2   43.39    2.91
  -1 -15  -2   41.39    3.00
   1 -15   2   44.93    5.45
  -1 -15  -2   41.34    4.50
   2 -15   2   31.90    5.79
   2 -15   2   33.76    2.75
  -2 -15  -2   34.37    3.75
  -2 -15  -2   32.18    3.08
  -3 -15  -2   54.94    2.96
   3 -15   2   56.58    2.87
   3 -15   2   58.04    6.04
  -4 -15  -2    0.05    1.96
  -4 -15  -2    0.03    2.58
   4 -15   2    1.29    2.37
   5 -15   2    9.09    2.50
  -5 -15  -2    9.00    3.16
   5 -15   2    9.26    5.12
  -6 -15  -2    4.17    3.08
   6 -15   2    5.88    5.37
   6 -15   2    2.13    2.50
  -8 -15  -2   42.87    3.83
   8 -15   2   40.28    2.79
  -9 -15  -2    0.22    2.91
   9 -15   2    0.22    2.42
 -10 -15  -2    1.26    3.58
  10 -15   2    1.05    5.79
 -11 -15  -2    4.75    3.41
  11 -15   2    4.75    6.12
  12 -15   2    7.97    6.87
  12 -15   2    5.23    2.75
 -13 -15  -2    8.36    1.67
 -13 -15  -2    8.74    4.21
 -14 -15  -2    0.55    4.00
 -14 -15  -2    0.95    1.62
 -15 -15  -2    3.60    1.87
  15 -15   2    2.42    7.83
  14 -16  -2    2.38    7.50
 -14 -16   2    2.38    1.71
 -13 -16   2    5.16    4.46
  13 -16  -2    3.20    7.37
  12 -16  -2    7.46    7.08
 -11 -16   2    0.54    3.87
  11 -16  -2    0.52    2.33
 -10 -16   2    0.75    3.58
  10 -16  -2    1.41    2.33
   9 -16  -2   10.79    2.62
   9 -16  -2   15.26    6.12
  -9 -16   2   12.09    3.87
  -8 -16   2   16.79    3.54
   8 -16  -2   16.80    5.66
   7 -16  -2   54.52    2.71
   7 -16  -2   52.50    6.29
   6 -16  -2   15.99    5.50
  -6 -16   2   18.37    3.29
   5 -16  -2   35.24    3.08
  -5 -16   2   38.69    3.46
   4 -16  -2    2.67    2.62
  -4 -16   2    2.18    3.37
   4 -16  -2    3.80    5.83
  -3 -16   2    1.56    2.79
   3 -16  -2    4.59    5.20
  -3 -16   2    4.22    4.66
  -2 -16   2   19.58    5.12
   2 -16  -2   20.51    2.66
  -2 -16   2   18.06    2.91
  -1 -16   2    1.59    2.54
  -1 -16   2    1.59    5.20
   1 -16  -2    4.52    5.16
   0 -16   2   15.77    5.12
   0 -16  -2   14.85    2.87
   0 -16  -2   14.44    5.50
   0 -16   2   15.25    2.96
  -1 -16  -2    4.09    4.66
  -1 -16  -2    5.06    3.04
   1 -16   2    4.09    2.62
  -2 -16  -2    1.06    3.75
   2 -16   2    3.53    2.75
  -2 -16  -2    0.24    2.71
  -3 -16  -2    1.26    3.12
   3 -16   2    2.68    5.66
   3 -16   2    1.28    2.54
   4 -16   2   17.34    5.87
  -4 -16  -2   15.45    2.33
  -4 -16  -2   14.18    3.16
  -5 -16  -2  100.64    3.79
   5 -16   2   99.56    3.37
   6 -16   2    9.21    5.79
   6 -16   2    9.82    2.71
  -6 -16  -2    7.17    3.33
   7 -16   2    5.54    2.58
  -7 -16  -2    8.34    3.25
   7 -16   2    7.24    6.37
   8 -16   2    8.63    5.95
  -8 -16  -2   10.59    3.58
   9 -16   2   50.95    3.33
   9 -16   2   48.00    6.37
 -10 -16  -2   20.85    3.75
  10 -16   2   20.98    4.37
  11 -16   2    0.32    2.83
  11 -16   2    3.07    6.91
 -11 -16  -2    0.32    3.58
  12 -16   2    3.39    3.50
  12 -16   2    4.42    7.04
 -12 -16  -2    0.94    4.29
 -13 -16  -2    4.75    4.58
  14 -16   2   11.19    7.66
 -14 -16  -2    9.33    4.58
 -14 -17   2    4.47    4.91
  13 -17  -2    1.32    8.04
 -12 -17   2    0.13    4.66
  12 -17  -2    2.30    7.00
 -11 -17   2    6.89    4.33
  11 -17  -2    6.89    7.29
  10 -17  -2   16.93    6.66
 -10 -17   2   15.96    4.21
  -9 -17   2    1.19    4.12
   8 -17  -2    1.88    2.71
   8 -17  -2    4.51    6.25
   7 -17  -2   21.87    6.87
   7 -17  -2   18.41    2.71
   6 -17  -2   21.88    6.66
  -6 -17   2   21.81    3.83
   5 -17  -2   24.12    2.75
   5 -17  -2   28.32    6.50
  -5 -17   2   25.53    3.25
  -4 -17   2    0.06    4.54
   4 -17  -2    0.51    2.66
   4 -17  -2    0.84    6.12
  -4 -17   2    0.06    3.08
   3 -17  -2    4.34    6.50
   3 -17  -2    3.29    2.96
  -3 -17   2    1.60    5.29
   2 -17  -2   10.07    6.33
  -2 -17   2    6.02    5.54
  -2 -17   2    4.66    3.16
   1 -17  -2    3.37    2.83
  -1 -17   2    2.08    2.96
  -1 -17   2    1.83    6.08
   0 -17  -2    1.30    3.00
   0 -17  -2    1.30    5.54
   0 -17   2    3.13    6.20
  -1 -17  -2    2.15    5.04
   1 -17   2    5.29    3.21
  -1 -17  -2    4.51    3.29
   2 -17   2   21.63    6.66
  -2 -17  -2   15.23    3.12
   2 -17   2   17.16    2.87
   3 -17   2   34.80    3.16
   4 -17   2   32.98    7.00
  -4 -17  -2   32.98    3.41
  -4 -17  -2   32.24    2.83
   5 -17   2   27.37    7.25
  -5 -17  -2   24.46    3.54
   5 -17   2   25.53    3.21
   6 -17   2   73.63    3.33
   6 -17   2   76.64    7.50
  -6 -17  -2   76.24    4.21
  -7 -17  -2    1.19    3.33
   7 -17   2    1.14    2.71
   7 -17   2    1.14    6.33
   8 -17   2   33.68    3.16
   8 -17   2   37.66    6.87
   9 -17   2    0.17    7.00
   9 -17   2    0.17    2.96
  10 -17   2    4.97    2.91
  10 -17   2    5.23    7.25
  11 -17   2   31.45    7.37
 -11 -17  -2   28.00    3.96
  11 -17   2   32.63    3.25
 -12 -17  -2    3.38    4.37
  12 -17   2    5.76    8.29
 -14 -17  -2    8.22    4.96
  13 -18  -2    6.50   10.12
  12 -18  -2    0.42    8.58
  10 -18  -2    8.94    7.58
 -10 -18   2   11.83    5.20
  -9 -18   2    8.18    4.41
   9 -18  -2   10.13    3.16
   9 -18  -2   11.95    7.41
   8 -18  -2   19.39    7.00
  -8 -18   2   19.66    4.04
  -7 -18   2   11.22    3.71
   7 -18  -2   13.86    7.79
   7 -18  -2   12.13    3.04
  -6 -18   2    2.69    3.71
   6 -18  -2    3.72    7.62
   6 -18  -2    0.31    3.04
   5 -18  -2    8.40    3.12
  -5 -18   2    7.62    3.87
   4 -18  -2    1.53    2.79
  -4 -18   2    1.51    3.54
   4 -18  -2    1.53    7.12
  -4 -18   2    3.83    5.37
  -3 -18   2   39.42    3.46
   3 -18  -2   38.50    7.33
   3 -18  -2   43.40    3.08
   2 -18  -2    9.67    7.70
   2 -18  -2    9.37    3.12
  -2 -18   2   10.22    3.50
  -2 -18   2    8.98    6.83
   1 -18  -2    6.76    2.96
  -1 -18   2    7.25    6.62
   1 -18  -2    7.62    7.29
  -1 -18   2    9.50    3.37
   0 -18   2   30.65    8.29
   0 -18  -2   28.05    6.87
   0 -18   2   26.83    3.71
   0 -18  -2   23.61    3.50
  -1 -18  -2   46.72    5.87
   1 -18   2   47.12    3.46
   1 -18   2   46.25    7.25
   2 -18   2   56.06    3.12
   2 -18   2   56.27    7.25
   3 -18   2   15.87    7.91
   3 -18   2   12.52    3.37
  -4 -18  -2   15.21    2.96
  -5 -18  -2    4.11    3.66
   5 -18   2    3.06    3.08
   7 -18   2   10.37    7.66
  -7 -18  -2    8.31    4.00
   7 -18   2    4.89    3.16
   8 -18   2    1.29    2.96
  -8 -18  -2    1.29    4.00
   9 -18   2    0.76    6.95
   9 -18   2    0.98    3.25
  -9 -18  -2    3.34    4.12
 -10 -18  -2    0.80    4.21
  10 -18   2    3.25    7.50
  11 -18   2    4.01    7.95
 -11 -18  -2    4.03    4.54
  12 -18   2    8.91    8.08
 -13 -18  -2    3.71    5.04
  13 -18   2    9.69   16.32
 -11 -19   2   19.93    4.87
  11 -19  -2   17.59    8.24
  10 -19  -2   18.11    8.74
  10 -19  -2   15.19    3.41
   9 -19  -2    8.23    8.20
   9 -19  -2    6.38    3.33
   8 -19  -2   10.90    8.24
  -8 -19   2   10.79    4.66
   7 -19  -2   16.59    3.33
  -7 -19   2   15.45    4.04
  -6 -19   2    3.41    4.50
   6 -19  -2    1.89    8.16
   6 -19  -2    6.21    3.37
  -5 -19   2    1.70    4.04
  -4 -19   2   41.77    4.41
  -4 -19   2   42.87    5.79
   4 -19  -2   49.44    8.87
  -3 -19   2    9.00    7.04
   3 -19  -2   12.49    3.50
   2 -19  -2    1.57    8.12
  -2 -19   2    5.45    7.62
  -2 -19   2    1.34    3.46
  -1 -19   2   28.29    4.04
   1 -19  -2   24.41    3.62
   1 -19  -2   32.39    8.37
  -1 -19   2   28.18    8.49
   0 -19  -2   14.29    3.50
   0 -19   2   14.48    8.58
   0 -19  -2   17.73   10.91
  -1 -19  -2   10.92    6.29
  -1 -19  -2    6.27    3.58
  -2 -19  -2   19.16    5.83
   2 -19   2   24.28    9.04
  -3 -19  -2   10.68    3.75
   3 -19   2    9.88    3.25
  -3 -19  -2    9.41    4.41
   3 -19   2    8.42    8.24
  -4 -19  -2   14.62    3.96
   4 -19   2   16.20    8.16
   4 -19   2   17.60    3.29
   5 -19   2   62.92    8.79
  -5 -19  -2   57.08    4.62
   5 -19   2   57.25    3.50
   6 -19   2   24.39    3.46
   6 -19   2   27.17    8.66
  -6 -19  -2   22.73    4.25
   8 -19   2    3.43    3.29
  -8 -19  -2    3.43    4.33
   8 -19   2    4.82    8.37
  -9 -19  -2    5.83    4.66
  10 -19   2    5.61    3.75
  10 -19   2    4.00    8.29
 -11 -19  -2    9.11    5.20
  11 -19   2    7.34    4.12
  12 -19   2    8.18    9.12
  10 -20  -2    0.74    8.95
  10 -20  -2    1.23    3.75
   9 -20  -2    2.47    9.37
   9 -20  -2    4.49    3.83
   8 -20  -2    1.59    3.54
  -8 -20   2    1.59    5.04
   8 -20  -2    1.59    8.99
   7 -20  -2    8.77    3.54
   6 -20  -2    7.47    3.50
   5 -20  -2    5.05    9.41
  -5 -20   2    5.20    4.71
   4 -20  -2   13.88    9.70
  -4 -20   2    6.61    4.25
  -3 -20   2    1.40    4.00
   3 -20  -2    1.40    9.41
   2 -20  -2    4.50    9.83
   2 -20  -2    2.51    3.58
  -2 -20   2    2.58    3.87
  -1 -20   2   47.13    4.04
   1 -20  -2   51.80    3.79
  -1 -20   2   65.06   17.66
   0 -20   2    8.83    3.91
   0 -20  -2    7.00    7.91
   0 -20   2    7.00    9.66
   0 -20  -2    9.88    3.62
  -1 -20  -2    1.82    7.83
   1 -20   2    0.43    9.24
   1 -20   2    1.70    3.71
   2 -20   2    0.99    9.62
  -2 -20  -2    3.81    6.45
  -2 -20  -2    0.97    3.83
   2 -20   2    2.70    3.71
   3 -20   2    5.79    3.75
  -3 -20  -2    3.81    4.04
   3 -20   2    5.29    9.62
   4 -20   2   13.40    9.24
  -4 -20  -2   11.38    4.33
   4 -20   2   11.04    3.58
   5 -20   2    4.54    3.75
   5 -20   2    5.02    9.54
  -5 -20  -2    2.43    4.25
  -6 -20  -2    7.14    4.21
   6 -20   2    5.72    9.24
   6 -20   2    2.40    3.58
   7 -20   2    2.76    3.50
   7 -20   2    1.41    9.37
  -7 -20  -2    1.41    4.29
   8 -20   2    6.22    3.75
   8 -20   2    7.74    9.24
   9 -20   2    2.02    3.91
  -9 -20  -2    2.02    5.16
  10 -20   2    5.59    4.25
  10 -20   2   10.42    9.04
 -10 -20  -2    7.30    5.25
   9 -21  -2    0.63   10.45
   9 -21  -2    4.38    4.00
  -9 -21   2    0.64    9.33
   7 -21  -2    1.69    3.87
   6 -21  -2    0.30   10.16
   6 -21  -2    1.82    3.62
  -6 -21   2    0.78    5.00
   5 -21  -2   10.88   10.33
   5 -21  -2   13.43    3.71
  -5 -21   2   10.88    4.50
   4 -21  -2    3.35    4.00
  -4 -21   2    0.10    4.50
   4 -21  -2    3.26   11.20
   3 -21  -2    1.91    3.75
  -3 -21   2    4.72    4.29
   3 -21  -2    1.79    9.62
  -2 -21   2    0.58    4.25
   2 -21  -2    0.58    3.54
  -2 -21   2    0.58    9.87
   1 -21  -2    0.17    9.24
   1 -21  -2    0.17    3.62
   0 -21   2    2.46    4.21
   0 -21  -2    3.83    4.04
  -1 -21  -2   11.15    4.29
   1 -21   2    9.72    3.91
  -2 -21  -2   12.74   10.87
  -2 -21  -2   10.76    4.66
   2 -21   2   13.10   10.58
   3 -21   2    1.86    3.91
   3 -21   2    3.36   10.66
  -3 -21  -2    1.17    4.54
   4 -21   2   20.19   11.12
  -4 -21  -2    9.32    4.12
   5 -21   2    0.15    3.71
   5 -21   2    6.47   10.70
  -5 -21  -2    0.13    4.50
  -6 -21  -2    0.30    4.83
   7 -21   2    5.93   11.12
  -7 -21  -2    0.35    4.71
   8 -21   2    0.47    4.08
  -8 -21  -2    0.26    4.83
   9 -21   2    4.92   10.78
   7 -22  -2    9.32   12.41
   7 -22  -2    1.86    4.00
   6 -22  -2    4.57   12.03
  -6 -22   2    5.37    5.04
   6 -22  -2    3.60    4.04
   5 -22  -2   13.80    4.04
   5 -22  -2   18.52   11.08
  -5 -22   2   16.79    5.00
   4 -22  -2   10.04   11.16
  -4 -22   2    7.64    4.54
   3 -22  -2    4.99    4.04
  -3 -22   2    7.75    5.04
   2 -22  -2    2.13    3.96
   2 -22  -2    2.13   10.53
  -2 -22   2    2.13    4.50
  -1 -22   2    1.97   11.08
  -1 -22   2    1.97    4.08
   1 -22  -2    1.97    4.04
   0 -22  -2    3.70   10.28
   0 -22   2    1.65   11.70
   0 -22   2    1.65    4.08
   0 -22  -2    1.67    4.16
  -1 -22  -2   10.28   13.95
   1 -22   2    6.55    4.33
   2 -22   2   14.86   11.74
   2 -22   2   10.21    4.37
   3 -22   2    7.55   11.83
   3 -22   2    4.48    4.12
   4 -22   2    0.98   11.91
   5 -22   2    5.35   11.66
   5 -22   2    3.73    4.25
  -6 -22  -2    0.02    5.25
   6 -22   2    0.78    4.33
   6 -22   2    4.63   11.45
   7 -22   2    5.80   11.66
   7 -22   2    3.04    4.16
   4 -23  -2    0.27   11.62
   3 -23  -2    8.32   12.24
  -3 -23   2    4.42    5.04
   2 -23  -2   10.14    4.33
  -2 -23   2   12.29    4.46
   2 -23  -2   11.68   11.95
   1 -23  -2    0.97   11.74
   1 -23  -2    4.39    4.91
  -1 -23   2    4.20    4.29
   0 -23   2   10.24    4.87
   0 -23  -2    8.80    4.66
   1 -23   2    1.02    4.50
  -1 -23  -2    2.13    4.71
  -2 -23  -2    2.16    4.71
   2 -23   2    3.43    4.87
   3 -23   2    0.39    4.41
  -3 -23  -2    0.39    5.12
   3 -23   2    0.39   12.74
  -4 -23  -2    0.51    8.45
   4 -23   2    0.51    4.33
   4 -23   2    1.55   13.37
 -19   0   3    0.47    1.79
  19   0  -3    0.51    5.75
  17   0  -3    0.27    4.96
 -17   0   3    0.27    1.37
  15   0  -3   21.12    5.04
 -13   0   3   56.89    0.92
 -13   0   3   57.65    1.29
  13   0  -3   55.88    4.04
  11   0  -3   24.09    3.91
 -11   0   3   22.65    1.08
  -7   0   3  302.03    7.41
  -7   0   3  307.19    6.04
  -5   0   3  867.11   22.65
  -1   0   3  820.41    1.33
   1   0   3  306.27    2.25
   3   0   3  152.51   14.99
  -3   0  -3  154.66   14.99
  -3   0  -3  153.02   14.99
   3   0   3  151.71   15.66
  -5   0  -3  372.44    7.91
  -9   0  -3   62.00    3.12
  11   0   3  346.81   10.74
  11   0   3  351.74    8.79
  13   0   3  201.97    7.95
 -13   0  -3  201.05    4.96
 -15   0  -3   15.18    1.29
  15   0   3   14.00    5.04
 -17   0  -3   97.46    2.42
 -20  -1   3    8.22    1.87
  20  -1  -3   11.86    6.91
 -20   1   3    7.71    1.92
  20   1  -3   10.18    5.79
  19  -1  -3    0.87    6.20
 -19  -1   3    1.18    1.71
  19   1  -3    3.65    5.54
 -18  -1   3   24.30    1.71
 -18   1   3   23.20    1.83
  18   1  -3   25.87    5.41
 -17  -1   3   47.04    1.79
  17  -1  -3   53.62    6.41
 -17   1   3   49.68    1.96
  17   1  -3   52.12    5.54
  16  -1  -3    1.15    4.83
 -16  -1   3    0.82    1.21
 -15  -1   3    2.58    1.04
 -15  -1   3    2.58    0.83
  15   1  -3    2.58    3.87
  14  -1  -3    0.14    4.08
 -14  -1   3    0.14    1.00
 -14   1   3    0.14    1.04
  14   1  -3    2.37    4.21
 -13  -1   3   13.95    1.00
 -13   1   3   13.98    1.12
  13   1  -3   15.45    3.37
 -12  -1   3   51.82    1.42
 -12   1   3   50.32    1.46
 -11  -1   3   69.49    1.87
 -11  -1   3   72.27    2.21
 -10   1   3   87.77    1.96
   9   1  -3   69.64    3.79
  -9   1   3   67.26    2.12
  -8  -1   3    5.17    0.50
   8  -1  -3    4.16    2.12
  -8  -1   3    5.17    0.87
   8   1  -3    4.10    1.87
  -8   1   3    4.62    0.54
  -7  -1   3  220.36    5.41
  -7  -1   3  217.35    6.75
  -7   1   3  219.67    5.41
  -6  -1   3  143.45    2.46
  -6   1   3  142.80    2.33
  -5  -1   3  109.58    2.83
  -5  -1   3  109.89    1.92
   5  -1  -3  110.28    1.87
  -5   1   3  107.98    1.87
   5   1  -3  109.96    2.66
  -5   1   3  111.12    3.33
   4  -1  -3  108.67    4.79
  -4  -1   3  108.66    5.37
  -4  -1   3  108.14    4.96
  -4   1   3  109.72    5.70
   3  -1  -3   85.45    2.50
  -3  -1   3   85.89    2.96
   3  -1  -3   87.94    3.29
   3   1  -3   85.60    2.83
  -3   1   3   84.99    3.25
   2  -1  -3  133.58    0.75
   2  -1  -3  134.30    0.12
   2  -1  -3  134.66    0.17
  -2  -1   3  133.75    0.46
  -2   1   3  134.78    0.79
   2   1  -3  134.78    0.46
  -2   1   3  134.19    0.17
   1  -1  -3  141.48    2.12
   1  -1  -3  141.54    2.42
  -1  -1   3  139.22    2.29
  -1   1   3  139.06    2.42
  -1   1   3  139.29    2.17
   0  -1  -3   84.86    3.04
   0   1   3   84.46    3.00
   0   1   3   84.92    3.12
  -1  -1  -3  251.86    0.21
   1  -1   3  252.20    1.12
  -1  -1  -3  253.12    0.29
   1   1   3  251.21    0.33
  -1   1  -3  249.65    1.04
  -2  -1  -3   10.58    1.46
   2  -1   3   10.62    1.46
   2  -1   3   10.51    2.58
  -2   1  -3   10.56    1.50
  -2   1  -3   10.56    1.50
  -4  -1  -3  155.93    0.79
  -4  -1  -3  157.86    2.17
   4  -1   3  153.76    2.00
   4  -1   3  156.94    0.62
   4   1   3  154.72    1.75
  -4   1  -3  155.88    0.62
  -4   1  -3  155.31    0.71
   5  -1   3  446.47    9.29
   5  -1   3  447.59    8.12
   5   1   3  441.33    8.16
  -6  -1  -3   53.49    1.29
  -6   1  -3   53.83    1.33
  -6   1  -3   53.11    3.25
   6   1   3   52.75    2.66
   7  -1   3   14.35    0.58
  -7  -1  -3   14.83    0.42
   7  -1   3   16.10    2.37
  -7   1  -3   14.28    0.50
   7   1   3   14.18    2.08
   7   1   3   14.14    0.92
   8  -1   3   56.94    1.50
  -8  -1  -3   58.20    1.42
  -8   1  -3   57.84    1.50
   8   1   3   57.72    1.83
  -9  -1  -3   78.72    1.54
   9  -1   3   81.67    3.87
  -9  -1  -3   79.67    1.58
  -9   1  -3   79.33    1.67
  10  -1   3    0.23    2.58
 -10  -1  -3    0.08    0.62
  10   1   3    0.23    2.71
  10   1   3    0.23    1.37
 -10   1  -3    0.12    0.67
 -10   1  -3    0.04    0.71
 -11  -1  -3    3.46    0.83
  11  -1   3    1.81    3.21
 -11   1  -3    1.81    0.71
 -11   1  -3    2.23    0.79
  11   1   3    1.81    1.54
  11   1   3    2.53    3.08
 -12  -1  -3    2.84    0.96
  12  -1   3    2.38    1.42
 -12   1  -3    3.32    0.87
  12   1   3    1.81    3.83
 -13  -1  -3    0.80    0.87
  13  -1   3    0.80    1.54
  13  -1   3    0.80    4.37
  13   1   3    2.78    3.54
 -14  -1  -3   31.94    1.29
  14  -1   3   30.24    4.71
 -14   1  -3   31.95    1.42
 -15  -1  -3    3.43    1.21
 -15  -1  -3    3.45    1.12
  15  -1   3    3.98    4.96
 -16  -1  -3    5.87    1.25
  16  -1   3    8.72    5.66
 -16  -1  -3    4.48    1.37
  17   1   3   10.80    5.70
  18  -1   3   10.88    6.08
 -18  -1  -3   10.00    1.54
 -18   1  -3    9.35    1.54
  19  -1   3   16.52    7.20
  19   1   3   13.67    6.87
  20  -1   3    1.35    7.54
 -20  -1  -3    1.35    2.75
 -20  -2   3    2.62    2.12
 -20   2   3    2.62    2.12
  20   2  -3    4.33    5.16
  19  -2  -3   11.80    6.37
 -19  -2   3    8.70    1.62
  19   2  -3    8.43    4.96
  18  -2  -3   12.88    6.04
 -18  -2   3   10.85    1.46
  18   2  -3   11.02    4.58
 -17  -2   3   11.30    1.46
  17  -2  -3   14.58    6.00
  16  -2  -3    2.88    5.00
 -16  -2   3    0.24    1.12
 -16   2   3    0.24    1.33
  16   2  -3    0.96    4.00
 -15  -2   3   47.01    1.25
 -15   2   3   47.35    1.58
 -14  -2   3    0.27    1.04
 -14  -2   3    0.75    0.96
  14  -2  -3    0.27    4.58
 -14   2   3    0.27    1.12
  14   2  -3    0.27    3.46
 -13  -2   3   36.66    0.92
 -13   2   3   37.56    1.17
 -12  -2   3   14.39    1.29
 -12  -2   3   14.20    0.87
 -12   2   3   13.78    1.17
 -11  -2   3    1.37    0.71
  11  -2  -3    1.37    3.04
 -11  -2   3    1.73    1.04
  11   2  -3    1.37    2.50
 -11   2   3    1.37    1.04
  10   2  -3  365.96    8.04
 -10   2   3  366.51    6.83
  -9  -2   3   53.53    0.83
  -9   2   3   52.60    0.87
   8  -2  -3   93.40    5.25
  -8  -2   3   94.26    3.37
  -8  -2   3   95.89    5.20
  -8   2   3   91.40    3.41
  -7  -2   3    0.77    0.42
   7  -2  -3    0.37    1.87
  -7  -2   3    0.37    0.83
  -7  -2   3    0.37    1.83
  -7   2   3    0.51    0.50
   7   2  -3    1.00    1.46
  -6  -2   3  245.15    6.37
  -6  -2   3  243.72    7.20
  -6   2   3  245.09    6.37
   6   2  -3  248.46    6.95
  -5  -2   3   74.46    1.50
   5  -2  -3   74.84    1.08
  -5   2   3   75.39    1.17
   4  -2  -3  146.09    2.54
   4  -2  -3  144.20    3.58
  -4  -2   3  143.46    3.00
  -4  -2   3  144.79    2.83
  -4   2   3  145.63    3.83
  -4   2   3  144.24    2.54
  -3  -2   3   57.40    4.58
   3  -2  -3   55.00    4.29
   3  -2  -3   57.21    4.33
  -3  -2   3   56.45    4.58
   3   2  -3   54.96    4.50
  -3   2   3   55.34    4.33
  -2  -2   3  152.15    2.62
  -2   2   3  151.76    2.50
   2   2  -3  153.66    2.62
   1  -2  -3    4.38    1.00
  -1  -2   3    4.31    1.54
  -1  -2   3    4.93    1.08
   0  -2  -3   56.56    1.00
   0  -2  -3   56.49    1.12
   0   2  -3   56.98    1.46
   0   2   3   55.53    1.08
   1  -2   3   48.99    2.54
  -1  -2  -3   50.23    1.58
   1   2   3   50.04    1.50
  -1   2  -3   49.45    2.46
   2  -2   3   17.34    0.71
   2  -2   3   17.53    2.12
   2   2   3   17.21    0.92
   3  -2   3   13.13    0.25
  -3  -2  -3   13.97    0.62
  -3  -2  -3   13.25    0.25
  -3   2  -3   13.57    0.29
   3   2   3   13.85    0.58
  -4  -2  -3   14.71    1.00
  -4  -2  -3   14.52    0.67
   4  -2   3   14.59    2.42
  -4   2  -3   15.85    2.71
   4   2   3   15.20    1.62
  -5  -2  -3 1319.85   32.23
   5  -2   3 1326.87   31.60
  -5  -2  -3 1311.97   31.60
   5  -2   3 1323.54   32.73
  -5   2  -3 1331.11   31.65
   6  -2   3   73.85    2.96
  -6  -2  -3   72.70    1.00
  -6  -2  -3   71.43    1.25
   6  -2   3   72.21    0.92
   6   2   3   72.40    2.21
   7  -2   3  457.98    8.37
   7   2   3  456.14    7.95
  -8  -2  -3   30.86    1.25
   8  -2   3   30.29    1.21
  -8  -2  -3   30.48    1.46
   8   2   3   31.79    1.83
  -8   2  -3   30.51    1.37
  -9  -2  -3  254.61    5.45
   9  -2   3  255.82    7.50
   9   2   3  253.39    5.75
 -10  -2  -3    1.70    0.87
  10  -2   3    2.08    0.92
 -10  -2  -3    1.91    0.62
  10  -2   3    1.83    3.33
 -10   2  -3    1.74    0.62
  10   2   3    2.12    2.66
  11  -2   3  228.76    3.58
  11  -2   3  228.04    6.25
 -11  -2  -3  234.18    3.54
 -11   2  -3  234.01    3.66
  11   2   3  230.83    6.00
  12  -2   3   19.26    1.54
 -12  -2  -3   19.89    1.17
  12  -2   3   19.87    4.58
  12   2   3   20.06    3.62
 -14  -2  -3   25.66    1.25
 -14   2  -3   24.25    1.37
  15  -2   3    1.76    5.54
 -15  -2  -3    0.83    1.08
 -15  -2  -3    0.83    1.21
  15   2   3    0.83    4.62
  16  -2   3   65.11    6.45
 -16  -2  -3   66.54    1.79
 -16   2  -3   65.49    1.92
  17  -2   3    1.83    6.00
 -17  -2  -3    2.38    1.37
 -17   2  -3    1.83    1.50
 -18  -2  -3    0.72    1.50
 -18   2  -3    0.72    1.71
  18   2   3    3.94    5.75
 -19  -2  -3    2.65    1.75
  19  -2   3    2.77    7.37
  19   2   3    1.55    6.45
  20  -2   3    1.12    7.70
  20  -3  -3    1.97    7.45
 -20   3   3    1.38    2.71
 -19  -3   3    0.94    1.54
 -19   3   3    0.94    1.92
  18  -3  -3   20.19    6.37
  18   3  -3   19.57    4.66
 -17  -3   3    5.30    1.33
  17  -3  -3    5.61    5.33
  17   3  -3    7.70    4.04
  16  -3  -3    5.44    5.75
 -16  -3   3    5.90    1.25
  16   3  -3    6.68    3.87
 -15  -3   3   12.37    1.25
 -15  -3   3   11.43    1.58
  15   3  -3   12.42    3.79
 -14  -3   3    0.57    1.37
 -14  -3   3    0.55    0.87
  14  -3  -3    0.45    4.41
  14   3  -3    1.48    2.83
  13  -3  -3    9.68    4.37
 -13  -3   3    9.01    1.50
 -13  -3   3    8.44    1.04
 -12  -3   3    0.29    1.37
 -12  -3   3    0.29    0.75
  12  -3  -3    3.68    4.00
  12   3  -3    1.62    2.50
 -11  -3   3    1.13    1.37
 -11  -3   3    1.55    0.71
 -10  -3   3   25.74    1.50
 -10  -3   3   25.04    1.87
   9  -3  -3   49.11    3.91
  -9  -3   3   48.77    1.42
   8  -3  -3   64.33    4.21
  -8  -3   3   61.26    2.58
  -8   3   3   61.99    2.25
   8   3  -3   63.38    3.04
  -7  -3   3  120.31    2.04
  -7  -3   3  120.86    1.62
  -7   3   3  120.99    1.71
   7   3  -3  119.66    2.25
  -6  -3   3 1316.08   22.82
   6   3  -3 1304.37   22.53
   5  -3  -3  129.91    2.42
  -5  -3   3  128.12    2.83
   5   3  -3  128.18    2.71
  -5   3   3  129.74    2.50
  -5   3   3  127.09    4.00
  -4  -3   3  102.70    1.25
   4  -3  -3  100.68    0.62
   4  -3  -3  101.12    0.67
   4  -3  -3  101.82    2.17
  -4   3   3  102.62    2.17
   3  -3  -3   70.73    1.92
  -3  -3   3   70.08    2.08
   3   3  -3   71.22    2.08
  -3   3   3   69.93    1.92
  -3   3   3   70.61    2.00
   2  -3  -3   29.58    0.83
  -2   3   3   29.43    1.00
  -2   3   3   30.76    1.96
   1  -3  -3   75.83    2.71
   1  -3  -3   73.87    2.25
  -1   3   3   73.80    2.71
   1   3  -3   76.56    2.71
  -1   3   3   74.65    2.25
   0  -3  -3   47.10    1.54
   0  -3   3   46.57    2.62
   0  -3  -3   48.00    1.67
   0   3   3   46.78    1.50
   0   3   3   48.00    1.71
   0   3  -3   49.38    2.42
  -1  -3  -3  202.62    0.75
  -1  -3  -3  203.04    0.96
   1   3   3  203.21    0.96
  -2  -3  -3    5.62    0.92
   2   3   3    5.86    0.62
   3  -3   3   27.57    0.58
  -3  -3  -3   27.89    0.92
   3  -3   3   29.00    2.37
   3   3   3   29.32    1.04
  -3   3  -3   27.72    0.62
   4  -3   3  176.07    5.12
   4  -3   3  177.02    3.62
  -4  -3  -3  173.67    3.91
  -4   3  -3  174.22    3.66
   4   3   3  175.75    4.12
  -5  -3  -3    0.41    0.33
   5  -3   3    0.22    1.96
  -5  -3  -3    0.22    1.42
   5   3   3    0.22    1.17
  -5   3  -3    0.50    2.58
   5   3   3    0.22    0.87
   6  -3   3   29.17    2.54
  -6  -3  -3   29.00    1.04
  -6  -3  -3   29.93    1.87
   6  -3   3   28.85    0.46
   6   3   3   28.22    1.54
  -7  -3  -3   45.31    1.67
  -7  -3  -3   45.86    1.21
   7  -3   3   45.06    1.04
   7  -3   3   46.72    3.37
  -7   3  -3   45.85    1.33
   7   3   3   45.16    1.83
  -8  -3  -3  487.85    7.04
   8   3   3  491.01    8.12
   9  -3   3    6.83    3.50
   9  -3   3    6.79    1.04
  -9  -3  -3    7.74    1.21
  -9   3  -3    7.38    1.12
  10  -3   3    1.22    3.33
 -10  -3  -3    0.90    0.62
 -10  -3  -3    1.16    1.17
  10  -3   3    1.05    0.83
 -10   3  -3    0.80    0.83
  11  -3   3   21.15    1.21
 -11  -3  -3   21.93    1.46
  11  -3   3   23.37    4.50
 -11  -3  -3   20.84    1.00
  11   3   3   20.84    3.29
 -12  -3  -3  113.25    2.29
  12  -3   3  112.09    2.17
 -13  -3  -3   15.79    1.33
  13  -3   3   15.08    1.29
 -13  -3  -3   14.00    1.04
  13   3   3   15.58    3.58
  14  -3   3    1.46    1.21
 -14  -3  -3    1.46    0.96
  14  -3   3    1.46    4.54
 -14  -3  -3    1.46    1.25
  14   3   3    1.46    3.66
 -14   3  -3    1.46    1.08
 -15  -3  -3    6.38    1.42
  15  -3   3    7.02    5.29
 -16  -3  -3    1.09    1.21
  16  -3   3    2.86    5.95
  16   3   3    0.90    5.50
 -17  -3  -3   30.36    1.50
 -17  -3  -3   32.66    1.79
  17  -3   3   33.67    6.29
  17   3   3   32.97    5.16
 -17   3  -3   29.29    1.83
  18  -3   3   14.74    7.00
  18   3   3   11.56    5.87
 -19  -3  -3    6.76    1.62
  19  -3   3   11.58    7.70
  19   3   3    5.18    5.87
 -19   3  -3    7.41    1.87
  20   3   3    7.00    7.00
 -20  -4   3    0.80    2.25
  20  -4  -3    0.17    7.29
  19  -4  -3   13.94    6.95
  19   4  -3   12.03    4.29
 -18  -4   3    4.16    1.33
  18  -4  -3    4.22    6.04
  18   4  -3    4.16    4.00
  17  -4  -3    5.87    5.79
 -17  -4   3    5.85    1.25
 -17  -4   3    5.85    1.71
 -17   4   3    5.87    1.67
  17   4  -3    7.77    3.62
 -16  -4   3   13.01    1.75
 -16  -4   3   11.70    1.21
  16   4  -3   12.61    3.37
  15  -4  -3    1.55    4.83
 -15  -4   3    1.59    1.00
 -15  -4   3    2.56    1.71
  14  -4  -3   15.88    5.50
 -14  -4   3   14.83    1.83
  14   4  -3   14.74    2.83
 -13  -4   3    4.37    1.67
  13  -4  -3    1.72    4.04
 -13   4   3    3.76    1.25
  13   4  -3    5.55    2.46
 -12  -4   3    0.86    0.79
  12   4  -3    0.91    2.08
 -11  -4   3    0.81    0.71
 -11  -4   3    1.39    1.50
  11   4  -3    1.33    1.83
 -10  -4   3   55.24    1.58
 -10  -4   3   56.19    2.12
  10  -4  -3   55.47    4.08
  -9  -4   3   19.54    0.62
  -9   4   3   19.26    0.75
   9   4  -3   20.47    1.37
  -8  -4   3  264.69    4.58
   8  -4  -3  266.97    6.70
  -8  -4   3  262.29    5.70
   8   4  -3  263.58    4.96
   7  -4  -3    0.60    2.29
  -7  -4   3    2.68    1.21
  -7   4   3    2.22    0.58
   7   4  -3    1.71    1.00
   7   4  -3    3.48    1.46
  -6  -4   3    1.15    1.21
  -6  -4   3    1.15    1.04
   6  -4  -3    1.15    2.25
  -5  -4   3  268.39    6.12
   5  -4  -3  268.96    7.25
  -5   4   3  264.85    5.83
   5   4  -3  268.46    5.91
  -4  -4   3  431.17    5.95
   4  -4  -3  433.55    7.04
   4  -4  -3  433.59    5.83
  -4   4   3  431.11    5.79
  -4   4   3  439.79    7.25
  -3  -4   3   35.38    1.42
   3  -4  -3   33.65    2.66
  -3  -4   3   33.84    1.83
   3  -4  -3   34.24    1.46
   3  -4  -3   35.54    1.25
  -3   4   3   34.18    1.46
  -3   4   3   33.21    2.58
   2  -4  -3    7.02    0.58
   2  -4  -3    7.32    0.21
  -2  -4   3    6.83    1.58
  -2  -4   3    8.02    0.92
  -2   4   3    6.88    0.58
  -2   4   3    6.92    1.46
   1  -4  -3  201.63    5.58
  -1   4   3  204.69    5.70
   0  -4  -3   68.13    1.67
   0  -4  -3   68.30    1.87
   0  -4   3   66.87    3.04
   0   4   3   68.61    1.67
   0   4   3   69.46    2.00
   0   4  -3   69.14    3.00
  -1  -4  -3   63.05    0.92
   1   4   3   62.65    1.04
   1   4   3   64.36    1.08
  -1   4  -3   60.20    2.58
  -2  -4  -3 1614.40   39.22
   2  -4   3 1641.28   40.18
  -2  -4  -3 1613.62   39.52
   2   4   3 1613.66   39.52
   3  -4   3   27.79    2.58
   3  -4   3   26.82    0.75
   3   4   3   26.38    0.67
   3   4   3   26.36    1.21
   3   4   3   27.01    1.33
  -4  -4  -3   18.88    1.04
   4   4   3   19.26    1.17
   4   4   3   19.24    0.54
  -4   4  -3   19.18    2.42
   5  -4   3   48.57    3.04
  -5  -4  -3   46.84    1.62
  -5   4  -3   45.98    1.08
   5   4   3   47.33    1.67
  -6  -4  -3   34.31    1.79
   6  -4   3   36.18    0.75
  -6  -4  -3   36.18    0.96
  -6  -4  -3   35.13    1.50
  -7  -4  -3  743.01   15.61
   7   4   3  732.40   15.53
  -7   4  -3  735.81   15.07
   8  -4   3  270.37    5.62
   8   4   3  271.90    6.66
  -8   4  -3  267.79    5.87
   9  -4   3  165.56    6.16
  -9  -4  -3  161.56    4.16
  -9   4  -3  161.56    3.83
   9   4   3  163.16    5.04
 -10  -4  -3   12.49    1.46
  10  -4   3   12.87    0.83
  10  -4   3   14.55    3.71
  10   4   3   13.65    2.54
  11  -4   3  176.27    8.08
 -11  -4  -3  182.65    3.91
 -11   4  -3  179.79    3.75
  12  -4   3   16.38    1.04
 -12  -4  -3   16.58    0.92
  12  -4   3   15.81    4.16
  12   4   3   16.02    2.83
 -13  -4  -3    6.93    0.87
  13  -4   3    6.11    4.54
 -13   4  -3    6.51    1.12
 -14  -4  -3   21.02    1.33
  14  -4   3   17.20    5.37
  14   4   3   20.26    3.83
  15  -4   3    0.35    5.20
 -15  -4  -3    0.18    1.08
 -15  -4  -3    0.18    1.50
  15   4   3    0.18    3.87
 -16  -4  -3   16.24    1.71
  16  -4   3   18.51    5.66
 -16  -4  -3   15.94    1.37
  16   4   3   13.42    4.08
  17  -4   3    2.80    6.29
 -17  -4  -3    1.12    1.37
 -18  -4  -3    2.15    1.37
  18  -4   3    4.68    7.08
  18   4   3    3.20    4.62
 -18   4  -3    2.15    1.62
 -19  -4  -3    7.21    1.71
 -19   4  -3    8.14    1.87
  19   4   3    6.12    5.16
 -19  -5   3    1.69    1.58
  18  -5  -3   11.13    6.41
 -18   5   3   11.00    1.92
  17  -5  -3    5.45    6.04
 -17  -5   3    4.42    2.00
  17   5  -3    4.40    3.33
 -17   5   3    4.55    1.75
 -16  -5   3   38.74    1.42
  16  -5  -3   44.03    6.29
 -16  -5   3   38.47    2.42
 -15  -5   3    7.05    2.12
 -15  -5   3    6.42    1.08
  15  -5  -3    6.59    5.50
  15   5  -3    5.87    2.75
 -14  -5   3   19.14    2.00
  14  -5  -3   15.53    4.58
 -14  -5   3   17.68    1.00
  14   5  -3   19.73    2.46
 -13  -5   3    8.25    1.12
 -13  -5   3   10.14    2.04
  13  -5  -3   11.11    4.58
  13   5  -3    8.90    2.37
 -12  -5   3  110.89    2.91
 -12  -5   3  112.07    3.54
  12   5  -3  113.19    3.75
 -11  -5   3   30.31    1.12
 -11  -5   3   32.59    2.12
 -11   5   3   29.96    1.29
 -10  -5   3   12.49    1.75
 -10  -5   3   11.47    1.21
  10  -5  -3   14.80    3.71
  10   5  -3   13.10    1.62
  -9  -5   3    2.00    2.46
  -9  -5   3    1.96    1.42
   9  -5  -3    1.92    2.62
  -9   5   3    1.79    0.71
  -8  -5   3  232.79    4.75
  -8   5   3  232.56    3.75
  -7  -5   3  137.71    3.79
   7  -5  -3  139.98    5.00
   7   5  -3  138.93    3.16
  -6  -5   3 1003.98   19.45
   6  -5  -3 1002.46   20.57
  -6  -5   3  996.39   19.49
   6  -5  -3  990.75   19.03
  -6   5   3 1004.63   19.15
   6   5  -3 1007.60   19.15
  -5  -5   3  534.84    7.12
   5  -5  -3  531.18    6.95
   5   5  -3  533.68    6.95
   5   5  -3  534.02    7.41
   4  -5  -3   52.25    0.92
  -4  -5   3   53.32    1.46
   4  -5  -3   50.08    2.33
  -4   5   3   52.02    0.96
  -3  -5   3   17.38    3.21
  -3  -5   3   18.45    2.71
  -3  -5   3   17.67    3.37
   3  -5  -3   19.52    4.04
   3  -5  -3   19.34    2.83
  -3   5   3   19.55    4.33
  -3   5   3   18.05    2.87
   2  -5  -3    9.40    0.83
   2  -5  -3    9.17    1.58
  -2  -5   3    9.33    1.08
  -2  -5   3    8.62    1.75
  -2   5   3    9.31    1.83
   2   5  -3    8.89    1.37
  -1  -5   3 1439.40   31.23
   1  -5  -3 1438.70   31.52
  -1  -5   3 1414.51   31.48
   1   5  -3 1441.73   31.40
  -1   5   3 1419.49   31.10
   0  -5  -3   74.03    1.83
   0  -5   3   71.84    2.96
   0  -5  -3   73.56    2.12
   0  -5   3   73.25    2.00
   0   5   3   75.59    1.87
   0   5   3   73.94    2.37
  -1  -5  -3   73.93    1.67
   1  -5   3   72.91    2.75
   1   5   3   73.86    1.71
  -2  -5  -3   40.59    0.54
   2  -5   3   38.57    2.08
  -2   5  -3   41.04    2.50
   2   5   3   38.74    1.00
   2   5   3   39.90    0.83
  -3  -5  -3   51.02    2.66
   3  -5   3   48.84    3.62
   3  -5   3   51.79    2.17
   3   5   3   50.82    2.66
  -3   5  -3   49.73    4.21
   3   5   3   50.64    2.21
  -4  -5  -3  182.56    3.66
   4  -5   3  181.75    5.00
   4   5   3  181.75    3.71
   5  -5   3   15.28    2.58
  -5  -5  -3   14.69    1.33
   5   5   3   15.64    0.58
  -6  -5  -3  475.28   10.66
  -6  -5  -3  475.13   10.95
   6   5   3  480.14   10.74
  -6   5  -3  468.52   10.58
  -7  -5  -3   17.99    0.87
   7  -5   3   19.06    0.79
  -7  -5  -3   19.63    1.83
   7  -5   3   18.47    3.25
  -7  -5  -3   18.01    1.67
   7   5   3   19.59    1.71
  -8  -5  -3  463.99    7.45
  -8  -5  -3  465.59    8.08
   8   5   3  470.06    8.04
  -9  -5  -3  118.02    3.04
  -9  -5  -3  118.86    2.50
  -9   5  -3  116.12    2.62
   9   5   3  117.26    3.50
  10  -5   3   30.57    4.46
  10  -5   3   26.69    0.92
 -10  -5  -3   26.65    1.17
 -10   5  -3   26.80    1.25
  11  -5   3   95.51    6.08
 -11   5  -3   92.89    2.62
 -12  -5  -3    2.27    1.67
  12   5   3    2.37    2.62
 -12   5  -3    2.33    1.04
  13  -5   3    0.05    4.62
  13   5   3    0.39    2.79
 -13   5  -3    0.05    1.12
 -14  -5  -3   19.64    1.12
 -14   5  -3   20.61    1.50
  14   5   3   22.21    3.33
 -15  -5  -3    2.78    1.92
 -15  -5  -3    2.02    1.08
  15  -5   3    1.45    5.70
 -16  -5  -3    3.15    2.04
 -16  -5  -3    3.86    1.25
 -16   5  -3    3.15    1.54
  16   5   3    4.27    3.62
 -17  -5  -3    0.26    1.37
  17  -5   3    0.76    6.33
  17   5   3    0.05    3.87
 -18  -5  -3    3.66    1.54
  18  -5   3    2.04    6.87
 -18   5  -3    2.04    1.71
  18   5   3    2.01    7.04
 -19  -5  -3    0.17    1.58
  19  -5   3    1.41    8.12
 -19   5  -3    0.17    1.79
  19  -6  -3    0.87    7.33
 -19  -6   3    1.58    1.62
 -19   6   3    0.87    2.12
  18  -6  -3    6.41    6.41
 -18   6   3    6.41    1.96
  17  -6  -3    3.57    5.75
 -17  -6   3    4.37    1.29
  17   6  -3    3.55    2.66
 -16  -6   3    8.22    1.17
 -16  -6   3    9.27    2.37
  16   6  -3    7.53    2.62
 -15  -6   3    4.37    1.08
  15   6  -3    3.91    2.21
 -14  -6   3   13.92    1.25
 -14  -6   3   15.67    2.25
  14  -6  -3   14.77    5.37
  14   6  -3   14.01    2.29
 -13  -6   3   14.29    2.21
 -13  -6   3   13.79    0.96
  13   6  -3   13.18    1.79
 -12  -6   3    1.32    0.92
 -12  -6   3    2.16    2.04
  12  -6  -3    1.48    3.96
  12   6  -3    1.50    1.54
 -12   6   3    1.48    1.12
 -11  -6   3    1.60    0.92
 -11  -6   3    1.74    2.00
 -11  -6   3    3.30    3.83
  11  -6  -3    1.49    4.00
 -11   6   3    1.55    1.17
 -10  -6   3    1.90    2.96
  10  -6  -3    2.85    3.71
 -10  -6   3    1.48    0.75
  10   6  -3    1.98    1.21
  -9  -6   3    7.61    2.46
   9  -6  -3    9.63    3.54
  -9   6   3    8.22    0.79
  -8  -6   3  260.82    6.87
   8  -6  -3  262.38    8.12
   8   6  -3  262.70    6.16
  -8   6   3  263.02    6.16
   7  -6  -3   95.69    2.54
   7  -6  -3   92.46    4.91
  -7  -6   3   93.24    3.29
   7   6  -3   97.58    2.71
  -7   6   3   95.01    2.66
   6  -6  -3   28.12    2.29
  -6  -6   3   25.30    1.08
  -6  -6   3   27.77    1.33
   6   6  -3   26.21    0.75
  -6   6   3   25.51    0.50
   5  -6  -3   63.26    2.33
  -5  -6   3   64.73    0.87
  -5  -6   3   64.77    1.46
   5  -6  -3   64.94    0.87
  -5  -6   3   63.17    1.33
  -4  -6   3   99.80    2.87
  -4  -6   3   99.95    2.25
   4  -6  -3   98.86    2.42
  -4  -6   3  100.63    2.96
   4  -6  -3  101.57    3.91
   3  -6  -3   19.72    3.16
   3  -6  -3   18.09    1.42
   3  -6  -3   18.26    1.75
  -3  -6   3   18.29    2.21
  -3   6   3   19.76    3.79
  -3   6   3   17.84    1.79
  -2  -6   3  827.59   12.37
  -2  -6   3  834.06   12.20
   2  -6  -3  837.07   12.66
  -1  -6   3    7.73    2.21
  -1  -6   3    7.16    1.42
  -1   6   3    8.14    1.29
  -1   6   3    7.10    2.08
   0  -6  -3  142.24    3.33
   0  -6   3  142.18    3.16
   0   6  -3  141.23    4.12
   0   6   3  142.18    3.04
   1  -6   3 1217.54   20.53
  -1  -6  -3 1218.47   19.86
   1  -6   3 1227.51   19.90
   1   6   3 1210.50   19.90
  -2  -6  -3  313.69    3.79
   2  -6   3  312.90    4.91
  -2  -6  -3  315.58    3.46
   2   6   3  317.46    3.75
   2   6   3  314.34    3.83
  -3  -6  -3   61.83    2.46
  -3  -6  -3   63.72    1.71
   3  -6   3   63.89    4.04
   3   6   3   64.00    2.04
   4  -6   3   14.12    2.33
  -4  -6  -3   13.29    1.25
   5  -6   3  173.63    6.08
  -5  -6  -3  169.54    4.58
  -6  -6  -3   11.23    1.37
   6  -6   3   10.43    2.79
   7  -6   3   10.72    0.58
  -7  -6  -3   10.19    1.50
   7  -6   3   10.36    3.41
   7   6   3   10.34    0.83
  -8  -6  -3  116.41    3.46
  -8  -6  -3  115.40    3.08
   8  -6   3  119.47    5.83
  -8  -6  -3  117.34    3.79
   8   6   3  115.76    3.29
   9  -6   3  103.66    5.12
  -9  -6  -3  101.43    2.00
   9   6   3  102.61    2.46
 -10  -6  -3  120.49    4.04
 -10  -6  -3  122.22    3.62
  10   6   3  117.75    3.33
 -10   6  -3  119.18    2.91
  11  -6   3   33.19    4.71
 -11  -6  -3   29.53    1.12
  11  -6   3   29.26    1.08
 -11   6  -3   29.46    1.33
 -12  -6  -3   14.71    1.75
  12  -6   3   13.99    4.29
 -12  -6  -3   14.18    0.92
 -12   6  -3   12.94    1.08
  12   6   3   15.34    2.04
 -13  -6  -3   11.78    1.12
 -13  -6  -3   12.01    2.29
  13  -6   3    9.70    5.12
 -13   6  -3   11.40    1.42
 -14  -6  -3    1.68    1.00
 -14  -6  -3    0.88    2.17
 -14   6  -3    0.71    1.29
 -15  -6  -3    4.78    1.12
 -15  -6  -3    4.68    2.46
  15  -6   3    2.23    5.62
 -15   6  -3    4.63    1.58
  15   6   3    3.28    2.75
  16  -6   3    6.26    6.08
 -16  -6  -3    3.52    2.04
 -16  -6  -3    3.52    1.17
 -17  -6  -3    2.59    1.33
  17  -6   3    5.16    6.66
 -17   6  -3    1.62    1.75
  18  -6   3    4.68    7.25
 -18  -6  -3    6.29    1.58
 -18  -6  -3    4.68    2.29
 -18   6  -3    5.84    1.92
 -19  -6  -3    0.99    1.79
  19  -6   3    1.31    7.62
 -19   6  -3    0.04    2.17
  19  -7  -3    0.55    7.25
 -19  -7   3    0.61    1.58
 -19   7   3    1.73    2.29
 -18  -7   3    0.01    1.37
  18  -7  -3    1.26    6.70
 -18   7   3    0.01    2.08
 -17  -7   3    9.24    1.29
 -17  -7   3    8.53    2.75
 -16  -7   3   10.95    2.62
 -16  -7   3   11.16    1.29
  16   7  -3    9.62    2.37
  15   7  -3   16.27    2.04
 -14  -7   3    3.64    2.54
 -13  -7   3    2.21    2.29
  13   7  -3    2.21    1.58
 -12  -7   3   40.37    1.33
 -12  -7   3   43.49    2.58
  12  -7  -3   44.58    5.33
  12   7  -3   42.64    1.92
  11  -7  -3    2.74    3.66
 -11  -7   3    4.26    1.96
  10  -7  -3  162.64    5.91
 -10  -7   3  158.45    3.21
 -10  -7   3  162.66    4.08
 -10   7   3  157.67    3.33
  10   7  -3  160.20    3.29
   9   7  -3  215.43    3.29
  -9   7   3  213.39    3.37
  -8  -7   3    1.57    1.96
  -8  -7   3    2.20    1.87
   8  -7  -3    2.01    0.79
   8  -7  -3    3.55    3.50
   8   7  -3    2.60    1.08
  -8   7   3    2.13    0.83
  -7  -7   3   74.35    2.87
  -7  -7   3   74.19    3.21
   7  -7  -3   73.45    4.46
   7  -7  -3   72.96    2.33
  -6  -7   3  124.56    2.17
   6  -7  -3  123.58    2.04
   6  -7  -3  125.24    4.04
  -6  -7   3  125.64    2.62
   5  -7  -3   26.97    3.16
  -5  -7   3   24.87    1.96
   5  -7  -3   25.14    1.33
  -5  -7   3   24.13    1.83
  -5  -7   3   24.26    1.17
   4  -7  -3   96.62    5.87
  -4  -7   3   96.80    4.37
  -4  -7   3   97.35    5.04
   4  -7  -3   94.59    4.58
  -4   7   3   96.99    4.62
   3  -7  -3    4.92    1.83
  -3  -7   3    2.66    1.37
  -3  -7   3    3.76    1.54
   3  -7  -3    1.69    0.87
   2  -7  -3  163.33    5.08
   2  -7  -3  162.68    4.12
  -2  -7   3  164.70    4.46
  -2  -7   3  161.79    4.83
   2   7  -3  166.68    4.62
  -2   7   3  163.56    4.21
   1  -7  -3   47.44    3.33
   1  -7  -3   43.56    2.50
  -1   7   3   47.20    2.66
   0  -7  -3    7.33    1.54
   0  -7  -3    7.36    1.17
   0  -7   3    8.94    1.25
   0   7   3    7.52    1.75
  -1  -7  -3    0.06    1.04
  -1  -7  -3    0.06    1.08
   1  -7   3    0.85    1.17
   1  -7   3    0.28    2.04
  -1   7  -3    0.17    2.42
   1   7   3    0.06    1.58
  -2  -7  -3  112.83    3.91
   2  -7   3  114.92    4.16
   2   7   3  113.36    4.25
  -2   7  -3  116.60    6.54
  -3  -7  -3  379.54    5.37
  -3  -7  -3  373.22    5.95
   3  -7   3  371.47    5.83
   3  -7   3  369.65    7.12
   3   7   3  379.85    5.70
   4  -7   3  296.94    6.79
  -4  -7  -3  293.19    5.54
   5  -7   3   11.44    2.66
  -5  -7  -3    9.77    1.42
   6  -7   3  453.08    9.45
  -6  -7  -3  451.71    7.83
   7  -7   3  114.95    5.04
  -7  -7  -3  112.06    3.04
   8  -7   3  255.39    5.29
  -8  -7  -3  256.85    6.20
   9  -7   3    5.41    0.54
  -9   7  -3    5.35    1.17
 -10  -7  -3   24.41    1.54
 -10  -7  -3   25.38    1.83
  10  -7   3   24.86    0.62
  10  -7   3   24.81    3.91
 -10  -7  -3   24.84    0.83
 -10   7  -3   24.58    0.83
  11  -7   3   19.60    0.87
  11  -7   3   16.42    4.79
 -11  -7  -3   17.81    2.21
  11  -7   3   20.05    1.37
 -11  -7  -3   18.76    1.08
 -11  -7  -3   19.88    2.46
 -11   7  -3   18.26    1.29
  12  -7   3   30.34    1.17
  12  -7   3   34.11    5.62
 -12  -7  -3   30.32    1.25
 -12   7  -3   30.04    1.46
  13  -7   3    6.73    4.91
 -13  -7  -3    7.47    1.04
 -13  -7  -3    6.75    2.50
 -13   7  -3    6.73    1.17
  13   7   3    7.09    1.75
  14  -7   3   33.78    6.29
 -14  -7  -3   31.86    2.79
 -14  -7  -3   30.09    1.42
 -14   7  -3   28.53    1.71
  14   7   3   30.03    2.37
 -15  -7  -3    1.44    1.12
 -15  -7  -3    0.94    2.46
  15  -7   3    0.94    6.00
  15   7   3    0.94    2.21
 -15   7  -3    0.94    1.37
 -16  -7  -3    0.21    1.25
  16  -7   3    0.21    6.20
 -16   7  -3    0.21    1.62
  17  -7   3   10.52    6.70
 -17  -7  -3    6.39    2.46
 -17   7  -3    6.73    1.71
  18  -7   3    5.85    6.83
 -19  -7  -3    3.05    1.67
 -19   8   3    1.39    2.42
 -18  -8   3    2.52    3.29
  18  -8  -3    1.95    6.45
 -18  -8   3    3.26    1.46
 -17  -8   3    5.69    3.08
  17  -8  -3    9.76    6.16
 -17  -8   3    8.11    1.50
  16  -8  -3    5.58    5.62
 -16  -8   3    6.15    2.91
 -16  -8   3    6.15    1.21
 -15  -8   3   41.63    2.96
  15  -8  -3   34.80    5.79
 -15  -8   3   38.64    1.37
 -15   8   3   37.08    1.75
  15   8  -3   39.69    2.29
  14  -8  -3   25.57    5.58
 -14  -8   3   25.93    2.79
 -14  -8   3   24.41    1.25
  13  -8  -3   41.82    5.16
 -13  -8   3   40.37    1.37
 -13  -8   3   41.09    2.87
 -13   8   3   39.57    1.62
  13   8  -3   40.28    1.92
 -12  -8   3    1.89    2.46
  12  -8  -3    1.34    4.46
 -12   8   3    0.76    1.25
  11  -8  -3    0.93    3.83
 -11   8   3    0.93    1.00
  11   8  -3    1.98    1.25
 -10  -8   3    1.17    2.04
  10  -8  -3    2.07    3.91
 -10   8   3    0.98    0.83
  10   8  -3    1.74    1.21
   9  -8  -3    4.88    3.75
  -9  -8   3    3.89    2.12
   9  -8  -3    3.17    0.75
  -9  -8   3    3.47    1.83
  -8  -8   3  132.12    3.91
  -8  -8   3  130.75    4.25
  -8  -8   3  131.57    3.79
   8  -8  -3  130.96    5.87
   7  -8  -3   14.25    3.08
  -7  -8   3   13.60    1.33
  -7  -8   3   13.05    2.04
  -7  -8   3   12.69    1.58
   7  -8  -3   12.69    1.04
  -6  -8   3   24.15    1.08
  -6  -8   3   23.81    1.83
   6  -8  -3   25.20    1.17
   6  -8  -3   23.64    2.83
  -6  -8   3   24.91    1.54
  -5  -8   3  232.46    4.21
   5  -8  -3  231.43    5.75
  -5  -8   3  233.81    4.54
  -4  -8   3    5.54    1.67
   4  -8  -3    5.79    1.00
   4  -8  -3    7.41    2.54
  -4   8   3    5.79    1.29
  -3  -8   3   13.09    1.42
   3  -8  -3   11.59    1.00
   3  -8  -3   12.06    2.21
   3   8  -3   11.85    1.54
  -2  -8   3  356.81    5.50
  -2  -8   3  354.57    5.12
   2  -8  -3  359.48    5.87
   1  -8  -3    0.12    1.79
   1  -8  -3    0.12    1.04
  -1  -8   3    0.14    1.87
  -1  -8   3    0.14    1.25
  -1   8   3    0.12    2.33
   1   8  -3    0.86    2.17
   0  -8   3   93.14    3.00
   0  -8   3   95.92    2.33
   0   8   3   97.58    3.00
   1  -8   3  113.76    3.21
  -1  -8  -3  111.67    3.25
   2  -8   3   15.04    2.25
  -2  -8  -3   15.99    2.37
  -3  -8  -3    9.35    1.12
   3  -8   3    9.20    1.71
   4  -8   3   12.97    2.87
  -4  -8  -3   10.53    1.46
  -5  -8  -3   44.99    2.08
   5  -8   3   45.35    3.58
   5  -8   3   46.87    1.87
   6  -8   3   26.95    3.21
   6  -8   3   28.83    1.46
  -6  -8  -3   27.60    1.92
   7  -8   3    4.74    3.33
  -7  -8  -3    4.47    1.83
   7  -8   3    6.32    1.42
   8  -8   3    0.89    1.29
   8  -8   3    1.14    3.87
  -8  -8  -3    0.74    1.75
  -9  -8  -3   24.84    2.29
   9  -8   3   22.90    4.00
   9  -8   3   25.81    1.58
  10  -8   3   40.47    1.62
  11  -8   3    6.85    4.33
  11  -8   3    5.44    1.25
 -11  -8  -3    5.44    0.92
 -12  -8  -3   37.56    1.29
  12   8   3   37.49    1.29
 -13  -8  -3   74.83    1.42
  13  -8   3   74.05    5.50
 -13   8  -3   73.86    1.75
  13   8   3   74.45    1.62
 -14  -8  -3    1.80    2.66
  14  -8   3    4.47    5.75
 -14  -8  -3    0.74    1.08
 -14   8  -3    2.51    1.46
 -15  -8  -3    8.93    2.87
 -15  -8  -3   10.78    1.29
 -15   8  -3    9.05    1.50
 -16  -8  -3    1.23    1.29
  16  -8   3    3.36    6.45
 -16  -8  -3    0.64    2.79
 -16   8  -3    0.37    1.62
 -17  -8  -3    3.55    2.83
  17  -8   3    6.92    7.08
  18  -8   3    0.33    7.91
 -18  -8  -3    0.31    1.50
 -18   8  -3    0.33    1.87
  19  -8   3    0.02    8.08
 -19   8  -3    0.02    2.50
 -18  -9   3    1.05    1.50
  18  -9  -3    1.05    7.33
 -18  -9   3    3.53    3.62
  16  -9  -3    2.48    6.75
 -16  -9   3    0.73    3.21
 -16  -9   3    1.44    1.42
 -15  -9   3    2.21    1.21
  15  -9  -3    4.42    5.45
 -15  -9   3    3.72    3.00
 -14  -9   3    5.46    2.75
 -14  -9   3    6.12    1.17
 -14   9   3    7.76    1.50
  14   9  -3    5.46    1.79
 -13  -9   3   18.28    2.79
 -13  -9   3   16.89    1.12
  13  -9  -3   15.37    4.66
 -13   9   3   17.48    1.37
  12  -9  -3   14.50    5.33
 -12  -9   3   12.97    1.12
  12   9  -3   13.77    1.46
 -11  -9   3   44.71    2.00
 -11  -9   3   45.81    2.79
  11  -9  -3   41.76    4.91
  10  -9  -3    2.22    3.87
 -10  -9   3    2.22    2.75
   9  -9  -3   24.13    4.54
   9  -9  -3   22.06    1.17
  -8  -9   3   23.44    2.04
   7  -9  -3  276.72    7.54
  -7  -9   3  277.21    6.16
   7  -9  -3  277.92    5.41
   6  -9  -3   50.06    1.83
  -6  -9   3   49.24    2.66
   6  -9  -3   51.24    3.83
  -5  -9   3  184.01    3.91
  -5  -9   3  178.97    4.91
   5  -9  -3  184.22    6.37
   4  -9  -3   70.75    3.41
  -4  -9   3   71.00    1.50
   4  -9  -3   71.29    1.96
   3  -9  -3   44.36    3.62
  -3  -9   3   42.99    3.00
   3  -9  -3   42.83    2.33
   3   9  -3   44.13    2.91
  -2  -9   3  101.52    3.41
   2  -9  -3   97.22    2.33
   2  -9  -3   99.44    3.54
   2   9  -3  100.20    3.25
   1  -9  -3   16.53    1.67
  -1  -9   3   16.15    2.08
  -1  -9   3   14.78    2.58
   1   9  -3   16.89    3.04
   0  -9   3  200.64    4.29
   0  -9   3  199.33    3.12
  -1  -9  -3  510.82    7.58
   1  -9   3  517.28    7.50
  -2  -9  -3   72.59    2.62
   2  -9   3   70.68    2.62
  -2  -9  -3   71.54    2.75
   2   9   3   70.13    3.21
   3  -9   3  102.79    2.83
  -3  -9  -3  104.05    2.87
  -3  -9  -3  103.08    2.33
   3  -9   3  104.16    4.75
   3   9   3  104.58    3.08
   4  -9   3   25.50    1.83
   4  -9   3   25.65    3.37
  -4  -9  -3   25.25    2.12
   5  -9   3  445.47    7.04
  -5  -9  -3  444.50    7.37
   5  -9   3  453.65    9.20
  -6  -9  -3   14.33    1.71
   6  -9   3   13.53    3.46
   7  -9   3    5.68    1.67
   7  -9   3    6.46    4.37
  -7  -9  -3    4.53    2.17
  -8  -9  -3    2.31    2.33
   8  -9   3    2.38    1.37
   9  -9   3  135.98    2.66
   9  -9   3  132.25    3.21
   9  -9   3  133.13    6.66
 -10  -9  -3   45.68    2.62
  10  -9   3   46.48    1.87
  10  -9   3   47.07    1.25
  11  -9   3    5.09    1.46
 -11  -9  -3    5.79    1.00
 -11  -9  -3    4.65    2.29
 -12  -9  -3    0.30    2.29
  12  -9   3    0.32    4.91
  13  -9   3    7.38    5.20
 -13  -9  -3    7.38    1.12
 -13  -9  -3    9.06    2.54
  13  -9   3    7.44    1.29
  14  -9   3    1.07    5.04
 -14  -9  -3    1.22    2.66
  15  -9   3    2.99    6.25
 -15  -9  -3    0.37    2.91
 -16  -9  -3    0.54    3.04
 -16  -9  -3    0.35    1.37
  17  -9   3   46.36    7.33
 -17  -9  -3   52.33    3.62
 -17  -9  -3   51.04    1.92
 -18  -9  -3    0.53    1.54
 -16 -10   3    5.66    3.41
  16 -10  -3    4.03    6.91
 -16 -10   3    4.03    1.25
  15 -10  -3   21.03    6.16
 -15 -10   3   16.36    1.62
 -13 -10   3   19.93    3.16
  13 -10  -3   17.68    5.37
 -12 -10   3   23.12    1.17
 -12 -10   3   21.46    2.62
  11 -10  -3    8.74    4.54
  11 -10  -3    8.63    0.67
 -11 -10   3    9.91    2.66
 -10 -10   3    9.16    2.66
  10 -10  -3    7.98    1.08
  10 -10  -3    7.48    4.66
  -9 -10   3  130.11    3.79
   9 -10  -3  128.36    2.46
   8 -10  -3    3.56    1.17
   7 -10  -3  111.52    2.29
  -6 -10   3   98.94    2.46
   6 -10  -3   95.59    2.21
  -6 -10   3   96.52    1.67
   5 -10  -3  244.00    7.29
  -5 -10   3  242.83    4.87
  -5 -10   3  239.85    5.91
  -5 -10   3  241.35    5.66
   4 -10  -3  127.35    3.00
  -4 -10   3  131.75    3.87
  -4 -10   3  127.90    3.54
  -4 -10   3  130.57    2.54
   4 -10  -3  128.74    4.96
  -3 -10   3  274.03    7.33
  -3 -10   3  278.49    7.58
   3  10  -3  272.59    7.20
   2 -10  -3  652.62   11.20
  -2 -10   3  652.24   10.53
  -2 -10   3  654.60   10.87
   2  10  -3  655.33   10.74
  -1 -10   3  325.73    8.16
   1 -10  -3  327.84    8.74
  -1 -10   3  323.25    8.74
   0 -10   3  178.58    3.75
   0 -10   3  179.09    4.87
   1 -10   3  258.91    6.20
  -1 -10  -3  257.57    6.45
   1 -10   3  262.22    7.54
  -2 -10  -3  115.26    3.71
   2 -10   3  110.63    3.62
   2 -10   3  109.36    5.29
   3 -10   3    2.50    2.83
   3 -10   3    3.63    1.62
  -3 -10  -3    3.65    1.17
   4 -10   3    3.86    3.37
  -4 -10  -3    3.88    1.62
   4 -10   3    4.94    1.42
  -5 -10  -3   61.71    2.87
   5 -10   3   61.75    4.41
   5 -10   3   62.30    2.46
   6 -10   3  104.79    2.54
  -6 -10  -3  102.18    2.87
   6 -10   3  102.26    4.71
  -7 -10  -3    5.39    2.42
   7 -10   3    9.02    4.37
   7 -10   3    4.34    1.46
   8 -10   3    4.76    1.58
  -8 -10  -3    4.51    2.08
  -9 -10  -3    1.00    2.21
   9 -10   3    4.04    4.54
   9 -10   3    1.22    1.54
  10 -10   3    5.59    4.79
  10 -10   3    1.89    1.50
 -10 -10  -3    3.04    2.54
 -11 -10  -3   12.23    1.12
  11 -10   3   10.25    4.29
  11 -10   3   11.30    0.92
  11 -10   3   10.86    1.54
 -12 -10  -3    3.04    1.12
 -12 -10  -3    3.89    2.71
  13 -10   3   10.15    1.46
 -13 -10  -3   10.49    1.21
  13 -10   3   12.49    5.58
 -15 -10  -3    3.52    1.33
  15 -10   3    7.39    6.75
 -16 -10  -3    0.34    1.33
 -16 -10  -3    0.34    3.41
  16 -10   3    0.34    6.16
 -17 -10  -3    6.76    1.58
 -17 -10  -3    4.78    3.50
  17 -10   3    5.98    7.12
  18 -10   3    5.82    8.04
 -18 -10  -3    2.24    1.67
 -17 -11   3    9.91    4.00
 -17 -11   3    7.16    1.75
 -16 -11   3    5.97    3.50
 -16 -11   3    3.48    1.50
  15 -11  -3    1.70    6.12
 -15 -11   3    1.71    1.33
 -14 -11   3    0.07    1.25
  14 -11  -3    0.07    6.04
 -14 -11   3    0.07    3.21
 -13 -11   3   14.31    3.21
  13 -11  -3   14.92    4.91
 -13 -11   3   14.23    1.25
  12 -11  -3    3.91    5.00
  11 -11  -3    1.25    1.04
  11 -11  -3    2.70    4.83
  10 -11  -3   93.68    5.33
  10 -11  -3   91.68    2.12
  -9 -11   3   31.65    2.75
   9 -11  -3   30.82    1.54
   9 -11  -3   30.19    4.83
  -8 -11   3   23.44    2.54
   8 -11  -3   25.49    1.50
   6 -11  -3   50.70    1.79
  -6 -11   3   50.52    1.12
   6 -11  -3   49.82    5.08
  -5 -11   3    6.80    2.29
   5 -11  -3    4.74    3.25
  -5 -11   3    7.44    2.17
  -5 -11   3    6.66    0.96
   5 -11  -3    5.67    1.50
   4 -11  -3  141.54    5.20
  -4 -11   3  143.23    4.37
  -4 -11   3  140.68    2.71
  -3 -11   3  299.50    6.37
  -3 -11   3  304.98    6.04
   3  11  -3  302.30    6.00
  -2 -11   3    0.90    2.66
  -2 -11   3    1.13    1.75
   2 -11  -3    1.34    2.91
   2  11  -3    1.64    2.91
   1 -11  -3    5.17    2.62
   1 -11  -3    3.02    1.67
  -1 -11   3    4.22    2.91
   0 -11   3   57.44    3.29
   0 -11  -3   54.64    2.96
   0 -11   3   56.62    4.33
   1 -11   3  189.88    6.25
  -1 -11  -3  191.88    5.12
   1 -11   3  188.24    4.66
  -1 -11  -3  189.56    4.62
  -2 -11  -3    1.93    1.79
  -2 -11  -3    2.14    1.54
   2 -11   3    1.93    1.58
   2 -11   3    2.16    3.04
   2  11   3    3.42    2.50
  -3 -11  -3   21.99    2.46
  -3 -11  -3   23.17    1.96
   3 -11   3   21.38    4.25
  -4 -11  -3  143.92    2.83
  -4 -11  -3  143.14    3.91
   4 -11   3  145.77    6.04
   4  11   3  144.63    3.62
  -5 -11  -3   45.55    4.71
   5 -11   3   41.44    2.71
   5 -11   3   42.24    5.29
   6 -11   3  109.28    3.16
  -6 -11  -3  107.99    3.66
   6 -11   3  112.52   10.33
  -7 -11  -3  112.85    3.58
   7 -11   3  111.42    5.66
   7 -11   3  109.88    2.79
   8 -11   3  142.37    3.54
  -8 -11  -3  143.15    4.37
   9 -11   3   13.85    4.46
  10 -11   3    4.48    1.67
  10 -11   3    1.82    5.33
 -11 -11  -3   89.56    3.12
 -11 -11  -3   88.90    1.54
  11 -11   3   84.96    6.00
  12 -11   3   24.04    1.87
  12 -11   3   21.66    5.29
 -12 -11  -3   22.42    1.42
 -12 -11  -3   26.59    3.16
 -13 -11  -3   21.94    1.50
  13 -11   3   21.06    1.87
 -14 -11  -3    2.91    3.21
 -14 -11  -3    1.58    1.37
  14 -11   3    2.72    6.20
 -15 -11  -3    2.43    3.37
  15 -11   3    3.78    6.12
 -15 -11  -3    2.50    1.37
 -16 -11  -3    2.33    1.50
 -16 -11  -3    2.64    3.58
 -17 -11  -3   12.36    3.79
  17 -11   3   13.82    7.83
 -17 -11  -3   12.34    1.62
 -17 -12   3    4.37    1.67
 -17 -12   3    2.58    3.87
  16 -12  -3   12.62    7.37
 -16 -12   3   11.15    3.91
 -16 -12   3   12.25    1.67
 -15 -12   3    1.50    1.42
 -15 -12   3    3.25    3.75
  15 -12  -3    1.37    6.37
  14 -12  -3   29.75    6.62
 -14 -12   3   27.94    3.71
 -14 -12   3   24.07    1.58
  13 -12  -3    7.11    5.70
 -13 -12   3    3.90    3.50
  12 -12  -3   36.63    5.83
 -12 -12   3   35.72    3.25
 -11 -12   3   42.63    3.21
  11 -12  -3   40.73    1.46
  10 -12  -3    5.48    4.66
 -10 -12   3    9.04    3.29
  -9 -12   3    7.13    2.75
   9 -12  -3    8.26    1.58
   8 -12  -3   93.10    5.83
   8 -12  -3   91.32    2.58
  -8 -12   3   90.50    3.50
   7 -12  -3  102.37    2.71
  -7 -12   3  102.01    3.91
   7 -12  -3  103.82    6.00
   6 -12  -3    7.64    1.54
  -6 -12   3   11.79    2.46
  -6 -12   3    7.64    1.67
   6 -12  -3    7.64    3.75
  -5 -12   3    5.94    2.25
   5 -12  -3    7.20    1.67
   5 -12  -3    8.55    4.21
  -4 -12   3    0.13    2.71
   4 -12  -3    0.15    3.12
  -3 -12   3   40.26    3.29
   3 -12  -3   39.60    3.83
   3 -12  -3   38.80    1.96
   3  12  -3   40.64    2.87
   2 -12  -3   70.36    2.42
  -2 -12   3   72.74    3.96
   1 -12  -3   19.98    3.37
  -1 -12   3   20.53    3.29
  -1 -12   3   20.97    2.42
   0 -12   3   76.03    4.25
   0 -12   3   74.96    2.91
   0 -12  -3   73.10    2.71
   0 -12  -3   77.21    3.83
  -1 -12  -3   38.18    2.42
   1 -12   3   37.78    2.42
  -1 -12  -3   36.95    2.96
   2 -12   3   61.11    2.25
  -2 -12  -3   57.76    2.37
  -2 -12  -3   60.66    2.46
   3 -12   3   22.99    2.17
  -3 -12  -3   24.42    1.87
   4 -12   3   17.80    2.00
   6 -12   3  114.53    3.21
  -6 -12  -3  118.47    3.66
   7 -12   3    0.18    1.71
   7 -12   3    0.18    4.33
   8 -12   3   56.60    2.37
  -8 -12  -3   58.06    3.12
   9 -12   3   14.99    5.00
  -9 -12  -3   15.79    3.21
 -10 -12  -3   36.67    2.83
  10 -12   3   34.81    4.41
  10 -12   3   37.43    1.92
  11 -12   3   27.10    5.91
 -11 -12  -3   29.25    3.29
  11 -12   3   31.84    2.46
  12 -12   3    3.61    1.96
 -12 -12  -3    3.05    3.16
 -12 -12  -3    2.86    1.25
 -13 -12  -3    1.07    1.37
 -13 -12  -3    1.02    3.04
  13 -12   3    4.79    6.20
 -14 -12  -3   52.84    3.87
  14 -12   3   54.72    7.20
 -14 -12  -3   48.88    1.71
 -15 -12  -3   12.45    1.50
 -15 -12  -3   14.01    3.83
 -16 -12  -3    2.51    3.91
  16 -12   3    2.95    7.37
 -16 -12  -3    1.52    1.58
 -17 -12  -3    2.14    1.58
 -17 -12  -3    3.11    4.16
 -16 -13   3    7.03    4.29
 -16 -13   3    6.39    1.71
  16 -13  -3    4.92    7.08
  15 -13  -3    8.21    6.83
 -15 -13   3   10.72    4.04
  14 -13  -3    3.08    6.37
 -13 -13   3    4.03    3.50
  13 -13  -3    2.47    5.87
  12 -13  -3    8.34    5.75
 -12 -13   3    4.49    3.58
 -11 -13   3  124.53    4.91
  11 -13  -3  127.10    7.58
  11 -13  -3  121.75    3.00
 -10 -13   3    4.22    3.12
  10 -13  -3    3.84    4.87
   9 -13  -3   56.31    5.54
   9 -13  -3   55.49    2.08
  -9 -13   3   59.05    3.37
   8 -13  -3    9.34    1.62
  -8 -13   3    9.13    2.83
  -7 -13   3   14.07    3.12
   7 -13  -3   13.61    2.08
   7 -13  -3   13.21    5.00
  -6 -13   3   22.85    1.12
   6 -13  -3   25.21    2.17
  -6 -13   3   24.13    1.87
   6 -13  -3   25.19    4.87
  -6 -13   3   22.07    2.66
  -5 -13   3  161.62    2.91
  -5 -13   3  163.47    4.91
  -5 -13   3  164.63    4.79
   5 -13  -3  162.59    3.79
  -4 -13   3   52.75    3.83
  -4 -13   3   53.16    3.54
   4 -13  -3   55.24    5.41
   4 -13  -3   51.64    2.62
   4  13  -3   51.43    2.96
  -3 -13   3   74.11    2.66
   3 -13  -3   73.60    3.66
   3  13  -3   72.48    3.16
  -2 -13   3   17.20    3.46
   2 -13  -3   19.12    2.08
  -1 -13   3   55.58    2.83
   1 -13  -3   55.43    4.00
  -1 -13   3   54.27    4.08
   1 -13  -3   58.67    2.79
   0 -13   3    8.41    3.79
   0 -13  -3    6.71    3.21
  -1 -13  -3   14.84    2.42
   1 -13   3   15.07    2.37
   2 -13   3    2.68    2.25
   2 -13   3    2.70    3.96
  -3 -13  -3   44.62    2.62
   3 -13   3   42.03    2.91
  -3 -13  -3   40.01    2.91
  -4 -13  -3    0.74    2.17
  -4 -13  -3    0.74    1.21
   4 -13   3    0.72    1.96
   5 -13   3   10.12    2.12
  -5 -13  -3    9.67    2.33
   5 -13   3    9.38    4.33
  -6 -13  -3  139.71    3.71
   6 -13   3  138.59    3.25
  -7 -13  -3   12.07    2.54
   8 -13   3   90.42    3.41
  -8 -13  -3   86.92    4.25
  -9 -13  -3    2.16    2.83
   9 -13   3    0.26    5.00
   9 -13   3    1.25    2.04
 -10 -13  -3   11.89    2.83
  10 -13   3   12.39    2.12
 -11 -13  -3   10.54    3.16
  12 -13   3    3.22    6.12
  12 -13   3    4.05    2.12
 -13 -13  -3    3.61    1.37
 -13 -13  -3    5.93    3.54
  14 -13   3    6.00    6.87
 -14 -13  -3    1.18    1.50
 -14 -13  -3    2.52    3.66
 -15 -13  -3   16.72    1.62
 -15 -13  -3   17.16    3.91
  16 -13   3    0.07    7.41
 -16 -13  -3    0.07    4.08
 -16 -13  -3    1.31    1.62
  16 -14  -3    2.45    8.54
 -16 -14   3    1.92    1.79
  15 -14  -3    0.21    7.04
 -15 -14   3    0.33    1.62
 -15 -14   3    3.16    4.25
  14 -14  -3    0.12    7.00
 -14 -14   3    1.00    1.54
 -13 -14   3    8.47    3.96
  13 -14  -3    6.50    6.66
  12 -14  -3   16.65    6.45
 -12 -14   3   17.93    3.96
 -11 -14   3   14.54    3.46
  11 -14  -3   13.87    5.45
 -10 -14   3   21.56    3.46
  10 -14  -3   22.49    1.96
   9 -14  -3    7.76    1.96
   9 -14  -3    9.87    5.41
  -9 -14   3    7.84    3.25
  -8 -14   3  100.23    3.96
   8 -14  -3   99.09    2.79
   7 -14  -3   31.68    2.37
  -7 -14   3   29.03    3.41
   7 -14  -3   35.85    5.20
  -6 -14   3    1.03    2.58
  -6 -14   3    2.09    0.96
  -6 -14   3    2.47    1.87
   6 -14  -3    3.39    1.92
   6 -14  -3    1.01    4.62
  -5 -14   3   10.49    3.12
  -5 -14   3   10.52    3.04
   5 -14  -3    9.88    2.04
   4 -14  -3    8.75    2.12
  -4 -14   3   10.67    3.71
   4 -14  -3   11.91    5.29
  -4 -14   3    9.53    2.62
   4  14  -3    9.24    2.66
  -3 -14   3    9.44    4.00
   3 -14  -3    7.03    2.21
  -3 -14   3   10.47    2.87
   3 -14  -3   10.11    4.50
   2 -14  -3  107.36    5.20
  -2 -14   3  109.23    3.79
  -1 -14   3  103.52    3.71
   1 -14  -3  101.28    3.41
   0 -14   3   61.58    4.91
   0 -14  -3   64.50    3.04
   0 -14  -3   67.28    4.33
   1 -14   3   15.55    4.83
   1 -14   3   19.99    2.54
  -1 -14  -3   19.32    2.58
  -1 -14  -3   18.08    3.54
   2 -14   3   21.09    4.87
  -2 -14  -3   18.04    2.50
   2 -14   3   20.92    2.46
   3 -14   3   28.51    5.12
   3 -14   3   28.93    3.08
  -3 -14  -3   28.27    2.62
   4 -14   3   21.88    4.83
  -4 -14  -3   23.67    1.58
  -4 -14  -3   22.32    2.37
   4  14   3   24.66    2.71
   5 -14   3   69.98    3.41
  -5 -14  -3   73.12    3.96
   5 -14   3   70.42    6.87
  -6 -14  -3    0.50    2.46
   6 -14   3    0.50    5.29
   6 -14   3    0.50    2.25
  -7 -14  -3    4.64    3.08
   7 -14   3    8.41    5.58
  -8 -14  -3  105.58    4.21
   8 -14   3  102.92    3.00
   9 -14   3   48.14    2.75
   9 -14   3   44.71    6.20
  -9 -14  -3   46.12    3.71
  10 -14   3    9.88    5.12
  10 -14   3   11.98    2.33
 -11 -14  -3    8.83    3.46
  11 -14   3    9.53    2.37
  12 -14   3   19.89    6.75
 -12 -14  -3   17.17    3.62
  13 -14   3    4.02    6.79
 -13 -14  -3    2.61    3.58
 -13 -14  -3    1.54    1.46
 -14 -14  -3   28.96    3.96
 -14 -14  -3   28.16    1.67
 -15 -14  -3    2.79    1.58
  15 -14   3    7.10    7.66
 -15 -14  -3    2.79    4.04
 -16 -14  -3    8.95    4.46
  16 -14   3   13.84   15.07
 -16 -14  -3    6.82    1.79
 -15 -15   3    9.32    1.71
 -15 -15   3    9.19    4.54
 -14 -15   3    0.26    1.62
 -14 -15   3    0.30    4.50
  14 -15  -3    0.32    6.79
  13 -15  -3    3.32    7.16
  12 -15  -3    4.64    6.54
 -12 -15   3    4.66    3.75
  11 -15  -3    0.41    5.66
  11 -15  -3    0.39    2.00
 -11 -15   3    0.11    3.66
  10 -15  -3    1.37    6.00
 -10 -15   3    3.47    3.62
  10 -15  -3    4.28    2.17
  -9 -15   3    2.35    3.66
   9 -15  -3    1.82    6.04
  -8 -15   3   15.44    3.41
   8 -15  -3   19.80    6.08
   8 -15  -3   17.52    2.12
   7 -15  -3    4.60    5.04
  -7 -15   3    4.36    3.62
   7 -15  -3    4.60    2.21
  -6 -15   3  133.27    2.96
  -6 -15   3  130.64    4.29
   6 -15  -3  130.60    3.54
  -5 -15   3    1.71    2.66
   5 -15  -3    3.90    5.16
   4 -15  -3    4.96    5.25
  -4 -15   3    5.89    4.12
  -4 -15   3    2.08    2.79
   4 -15  -3    3.34    2.37
   4  15  -3    2.94    2.87
   3 -15  -3  157.05    3.83
  -3 -15   3  159.24    4.50
   2 -15  -3    4.88    2.42
   2 -15  -3    3.52    4.96
  -2 -15   3    5.12    3.04
  -1 -15   3    6.88    2.66
  -1 -15   3   11.00    4.75
   1 -15  -3    6.88    4.41
   1 -15  -3    6.88    2.29
   0 -15  -3   49.87    3.00
   0 -15   3   49.13    3.37
   1 -15   3   36.75    2.58
   1 -15   3   40.44    5.04
   2 -15   3    2.75    2.29
  -2 -15  -3    3.12    2.62
   2 -15   3    2.75    5.41
  -2 -15  -3    2.75    3.25
  -3 -15  -3    6.13    2.58
  -3 -15  -3    7.90    2.54
   3 -15   3    9.46    2.54
  -4 -15  -3    4.00    1.79
   4 -15   3    4.19    4.96
   4  15   3    3.58    2.83
   5 -15   3   43.89    5.70
  -5 -15  -3   42.71    3.21
   6 -15   3    1.22    2.37
   6 -15   3    0.50    6.00
  -6 -15  -3    0.50    2.87
   7 -15   3    1.40    5.33
  -7 -15  -3    1.47    3.08
   7 -15   3    1.40    2.66
   8 -15   3   17.19    5.58
   9 -15   3   17.86    2.91
  -9 -15  -3   15.87    3.41
  10 -15   3    1.69    2.50
  10 -15   3    3.54    5.87
 -10 -15  -3    2.19    3.46
 -11 -15  -3   14.96    3.66
  12 -15   3   17.34    2.75
  12 -15   3   21.11    7.37
 -13 -15  -3    5.37    1.50
 -13 -15  -3    5.92    3.75
  13 -15   3    7.16    6.66
 -14 -15  -3    4.97    1.67
 -14 -15  -3    5.22    4.00
  14 -15   3    2.52    6.62
 -15 -15  -3    3.48    1.71
 -15 -15  -3    3.48    4.08
  15 -15   3    3.48    6.91
  14 -16  -3   11.01    8.37
 -13 -16   3    1.35    4.37
 -12 -16   3    9.71    4.21
  12 -16  -3    6.15    7.25
  11 -16  -3   12.50    6.62
  10 -16  -3    3.04    2.12
 -10 -16   3    2.45    4.08
  10 -16  -3    2.45    5.70
   9 -16  -3    5.30    5.87
   9 -16  -3    4.75    2.42
  -9 -16   3    4.52    4.00
   8 -16  -3    2.85    5.95
   7 -16  -3   16.02    2.62
  -7 -16   3   11.97    3.79
   7 -16  -3   15.20    6.66
  -6 -16   3   13.64    1.92
   6 -16  -3   12.86    2.42
  -5 -16   3   12.15    3.75
   5 -16  -3   13.56    5.62
  -5 -16   3   13.62    3.54
   5 -16  -3   12.23    2.46
  -4 -16   3  140.62    5.16
   4 -16  -3  148.02    7.79
  -3 -16   3    2.63    3.16
   2 -16  -3   49.40    3.12
  -2 -16   3   47.12    5.58
  -2 -16   3   51.34    3.75
   2 -16  -3   54.12    6.87
  -1 -16   3    1.11    5.87
   1 -16  -3    1.42    2.54
   0 -16  -3   14.93    3.08
   0 -16   3   12.93    3.21
   0 -16  -3   16.81    5.16
  -1 -16  -3   23.32    2.79
   1 -16   3   25.39    2.79
  -2 -16  -3  177.34    4.79
   2 -16   3  174.18    4.29
  -3 -16  -3    5.19    3.00
   3 -16   3    4.72    2.58
   4 -16   3    0.56    5.83
  -4 -16  -3    0.58    2.00
   4 -16   3    0.56    2.50
  -4 -16  -3    0.58    2.62
   5 -16   3   30.33    6.08
   5 -16   3   27.61    2.91
   6 -16   3    7.99    5.62
   6 -16   3    6.56    2.58
  -6 -16  -3    9.00    3.08
   7 -16   3   17.42    6.87
  -7 -16  -3   14.81    3.62
   8 -16   3   11.87    2.75
   8 -16   3   14.48    6.08
   9 -16   3    4.62    2.54
  10 -16   3   13.03    7.29
 -10 -16  -3    9.07    3.66
  10 -16   3    7.45    3.16
 -11 -16  -3    3.09    4.04
  11 -16   3    0.54    6.87
 -12 -16  -3    1.92    3.91
  12 -16   3    1.92    2.83
 -13 -16  -3    1.80    4.08
  13 -16   3    0.06    7.04
  14 -16   3    5.01    7.99
 -14 -16  -3    5.04    4.50
 -14 -17   3    3.73    5.29
 -13 -17   3    3.70    4.75
  13 -17  -3    9.04    7.08
  12 -17  -3   10.55    7.33
 -12 -17   3    6.27    4.33
  10 -17  -3    2.72    3.29
 -10 -17   3    6.33    4.16
  10 -17  -3    6.37    6.83
  -9 -17   3    3.00    3.71
   9 -17  -3    3.00    6.41
  -8 -17   3    0.51    3.96
   8 -17  -3    0.51    6.37
   7 -17  -3   20.86    6.50
   7 -17  -3   21.90    2.87
   6 -17  -3    7.27    6.45
   6 -17  -3    2.13    2.66
  -6 -17   3    1.53    3.75
  -5 -17   3    4.02    3.46
   5 -17  -3    4.06    2.75
   5 -17  -3    4.02    6.20
  -5 -17   3    4.02    4.04
   4 -17  -3    4.39    2.91
   4 -17  -3    2.73    6.16
  -4 -17   3    4.87    3.12
   3 -17  -3   57.89    7.08
   3 -17  -3   52.85    3.41
  -3 -17   3   60.65    6.41
  -3 -17   3   56.39    3.87
   2 -17  -3    1.78    6.16
  -2 -17   3    1.80    5.79
   1 -17  -3   25.48    3.25
   1 -17  -3   30.19    6.87
   0 -17   3   34.71    6.87
   0 -17   3   31.41    3.29
   0 -17  -3   31.93    5.37
   0 -17  -3   31.64    3.21
   1 -17   3   43.00   12.70
   1 -17   3   34.11    3.16
  -1 -17  -3   35.46    3.29
  -1 -17  -3   33.22    5.12
  -2 -17  -3   10.81    2.83
   2 -17   3   10.66    3.00
   3 -17   3   15.85    3.12
  -3 -17  -3   15.55    3.33
   3 -17   3   14.79    6.50
  -4 -17  -3    1.08    3.37
  -4 -17  -3    2.07    2.21
   4 -17   3    3.36    2.91
   5 -17   3   13.47    6.83
   5 -17   3   13.47    2.79
  -5 -17  -3   13.47    3.29
   6 -17   3    9.86    6.66
  -6 -17  -3    7.84    3.71
   6 -17   3    5.77    2.79
  -7 -17  -3   30.20    3.29
   7 -17   3   30.20    6.37
   7 -17   3   30.20    2.79
  -8 -17  -3    5.31    3.46
   8 -17   3    7.78    2.87
   8 -17   3    5.31    6.12
  -9 -17  -3    6.00    3.75
   9 -17   3    5.45    6.70
   9 -17   3    7.16    2.87
  10 -17   3    6.59    6.75
 -10 -17  -3    9.24    3.96
  10 -17   3    8.38    2.96
 -11 -17  -3    4.74    4.46
 -12 -17  -3    2.73    4.16
  12 -17   3    2.73    7.83
  13 -17   3    4.65    7.83
 -13 -17  -3    3.15    4.50
 -14 -17  -3    3.32    4.71
  13 -18  -3    2.65   10.28
 -13 -18   3   10.36    5.58
 -12 -18   3    2.28    5.20
  11 -18  -3    3.89    7.95
 -11 -18   3    5.49    5.12
  10 -18  -3    4.74    8.20
 -10 -18   3    2.72    4.79
  10 -18  -3    1.94    2.87
  -9 -18   3   14.95    4.62
   9 -18  -3   16.74    7.74
  -8 -18   3   12.28    4.54
   8 -18  -3   13.25    7.41
   7 -18  -3    3.78    7.12
  -7 -18   3    4.75    4.08
  -6 -18   3    8.80    3.71
   6 -18  -3    8.46    7.20
   6 -18  -3    9.48    2.87
  -5 -18   3    9.14    3.58
   5 -18  -3   15.51    7.70
   5 -18  -3   10.35    2.91
  -5 -18   3    9.14    4.50
  -4 -18   3   10.39    5.83
  -3 -18   3    5.36    6.54
   3 -18  -3    1.69    3.00
   2 -18  -3   33.52    7.83
  -2 -18   3   28.02    3.75
  -2 -18   3   31.92    7.66
   1 -18  -3    5.26    3.16
   1 -18  -3    9.91    6.83
  -1 -18   3    5.97    3.25
   0 -18   3    5.34    3.62
   0 -18  -3    6.35    6.58
   0 -18  -3    6.44    3.04
   1 -18   3    0.28    3.12
  -2 -18  -3    2.54    3.16
  -2 -18  -3    1.34    4.50
   2 -18   3    3.21    7.37
   3 -18   3    1.31    7.08
  -3 -18  -3    1.33    3.33
  -3 -18  -3    1.33    3.66
  -4 -18  -3    1.10    2.50
  -4 -18  -3    0.09    3.41
   4 -18   3    1.13    6.87
   5 -18   3   33.88    3.04
   5 -18   3   34.25    7.50
  -6 -18  -3    2.17    3.96
   6 -18   3    1.35    6.87
   6 -18   3    1.35    3.12
   7 -18   3   25.96    3.29
  -7 -18  -3   24.40    3.79
   8 -18   3    3.07    7.16
   8 -18   3    5.84    3.12
  -8 -18  -3    2.15    4.04
  -9 -18  -3   20.78    4.41
   9 -18   3   18.28    3.41
 -10 -18  -3    5.22    4.29
  10 -18   3    4.40    3.33
 -11 -18  -3   15.67    4.25
  11 -18   3   15.33    7.99
  12 -18   3    5.46    8.24
 -13 -18  -3    0.26    4.71
 -12 -19   3    9.51    5.62
  12 -19  -3    4.88    8.83
  11 -19  -3    3.87    8.70
 -11 -19   3    2.65    4.96
 -10 -19   3    3.84    5.04
  10 -19  -3    1.33    8.04
  10 -19  -3    1.33    3.33
  -9 -19   3    4.21    4.75
   9 -19  -3    8.36    8.04
   8 -19  -3    7.82    3.25
   8 -19  -3    5.73    8.41
  -8 -19   3    3.56    4.71
  -7 -19   3    2.73    4.66
   7 -19  -3    1.13    8.04
   6 -19  -3    1.53    3.21
  -6 -19   3    1.46    4.12
   5 -19  -3    3.65    8.54
   5 -19  -3    2.21    3.16
  -5 -19   3    3.62    4.16
   4 -19  -3    4.75    3.41
  -4 -19   3    6.27    4.41
  -4 -19   3    2.83    6.54
   4 -19  -3    9.28    8.70
   3 -19  -3   15.16    3.33
   2 -19  -3    2.77    7.37
  -1 -19   3    6.32    8.79
  -1 -19   3    5.33    3.71
   1 -19  -3    6.44    3.58
   1 -19  -3    2.86    7.54
   0 -19  -3    0.25    7.95
   0 -19   3    1.88    3.46
   0 -19   3    0.25    8.04
   0 -19  -3    3.50    3.37
   1 -19   3   35.73    8.54
  -1 -19  -3   35.08    3.66
  -1 -19  -3   40.05    6.33
  -2 -19  -3   22.83    5.41
  -3 -19  -3    0.89    3.54
   3 -19   3    5.87    3.16
  -3 -19  -3    0.89    4.08
   3 -19   3    3.59    8.29
   4 -19   3    0.45    3.29
   4 -19   3    1.18    8.54
  -4 -19  -3    2.85    3.87
   5 -19   3   12.68    8.16
  -5 -19  -3   12.68    3.58
   6 -19   3    9.81    8.04
  -6 -19  -3   12.38    3.87
   7 -19   3    0.15    3.50
  -7 -19  -3    0.15    4.12
   7 -19   3    0.15    7.83
   8 -19   3    2.97    3.54
   8 -19   3    5.11    8.58
  -8 -19  -3    1.78    4.29
   9 -19   3    1.46    8.58
   9 -19   3    0.20    3.62
  -9 -19  -3    1.55    4.54
 -10 -19  -3    7.53    4.79
  10 -19   3    6.96    3.71
  10 -19   3   11.09    8.24
 -11 -19  -3    1.48    4.79
  10 -20  -3   17.69    3.79
  10 -20  -3   24.60    9.29
  -9 -20   3    8.42    5.41
   9 -20  -3    8.40    3.50
   8 -20  -3   25.00    3.79
   8 -20  -3   29.91    9.45
  -7 -20   3    0.96    4.50
   7 -20  -3    3.60    9.16
   7 -20  -3    1.36    3.50
  -6 -20   3    7.36    4.66
   6 -20  -3    4.93    9.70
   5 -20  -3    6.50    9.45
  -5 -20   3    2.98    4.33
   5 -20  -3    2.96    3.46
   4 -20  -3    6.98    3.41
   3 -20  -3   20.40    9.16
   3 -20  -3   14.58    3.71
  -2 -20   3    9.54    4.04
  -2 -20   3   14.31    8.66
   2 -20  -3   10.37    8.87
  -1 -20   3    0.68    3.41
   1 -20  -3    1.70    3.79
  -1 -20   3    0.68   10.45
   1 -20  -3    0.68    8.62
   0 -20  -3   13.08    8.16
   0 -20   3   14.30    9.54
   1 -20   3   11.96    3.54
  -1 -20  -3    8.86    3.71
   1 -20   3   12.42    9.66
  -1 -20  -3   11.33    7.20
   2 -20   3    4.86    9.70
  -2 -20  -3    3.11    4.04
   3 -20   3    5.75    3.91
   3 -20   3    6.11    9.95
  -4 -20  -3    2.21    4.21
   4 -20   3    2.81    3.62
   5 -20   3   12.28    3.79
   5 -20   3   12.40    9.49
  -5 -20  -3    6.17    4.79
   6 -20   3    4.45    8.95
  -6 -20  -3    3.27    4.21
   6 -20   3    3.27    3.37
  -7 -20  -3    6.03    4.66
   7 -20   3    3.49    3.66
  -8 -20  -3    1.27    4.46
   8 -20   3    0.30    8.83
   8 -20   3    0.30    3.54
  -9 -20  -3    0.50    4.83
   9 -20   3    2.75    3.96
  10 -20   3    0.28    8.95
 -10 -20  -3    3.44    5.29
  10 -20   3    0.51    4.04
   9 -21  -3   18.72   10.58
   8 -21  -3    2.51    3.96
   8 -21  -3    6.24   10.04
  -7 -21   3    2.53    4.83
   7 -21  -3    0.17    9.74
   6 -21  -3    3.28    3.62
   6 -21  -3    1.11    9.83
   5 -21  -3    5.91    3.83
  -5 -21   3    6.75    4.87
   4 -21  -3    0.40    9.74
  -4 -21   3    0.78    4.58
   4 -21  -3    0.40    3.66
   3 -21  -3    0.10    3.54
  -2 -21   3    2.79   10.41
   2 -21  -3    2.61    9.41
   2 -21  -3    1.64    3.58
  -2 -21   3    1.64    3.96
   1 -21  -3    7.12    3.83
  -1 -21   3    7.12    3.87
  -1 -21   3    7.12   10.04
   1 -21  -3    6.89    9.20
   0 -21   3    1.63    4.00
   0 -21  -3    2.75    3.87
   1 -21   3    4.70    4.08
  -2 -21  -3    1.88    4.16
   2 -21   3    0.43    3.83
   2 -21   3    0.07   10.45
   3 -21   3    5.52    4.00
  -3 -21  -3    5.36    4.58
   3 -21   3    4.93   10.87
   4 -21   3    2.40   10.49
  -4 -21  -3    2.53    4.75
   5 -21   3    0.10    3.71
   6 -21   3    2.51    3.91
   6 -21   3    6.55   10.49
  -7 -21  -3    0.30    4.62
   7 -21   3    0.30    3.75
   8 -21   3    4.60   10.16
  -8 -21  -3    4.77    4.71
   8 -21   3    4.60    3.87
   9 -21   3    0.74    4.21
   9 -21   3    0.74    9.37
   7 -22  -3    0.00   11.28
   7 -22  -3    0.00    4.04
   6 -22  -3    0.61    3.96
  -6 -22   3    1.22    4.91
   6 -22  -3    9.37   11.78
   5 -22  -3    4.07    4.00
  -5 -22   3    1.36    4.66
   4 -22  -3    4.89   10.78
   4 -22  -3    2.43    4.12
   2 -22  -3    1.57    4.16
   2 -22  -3   10.94   11.16
   1 -22  -3   10.65   10.58
   1 -22  -3   10.65    4.00
   0 -22  -3    3.10    4.25
   0 -22   3    3.80    4.08
   0 -22  -3    3.50    9.33
   1 -22   3    8.30   11.78
  -1 -22  -3    3.66    4.62
   2 -22   3    0.26   11.74
   2 -22   3    0.26    3.96
  -3 -22  -3    3.64    4.58
   3 -22   3    3.59   11.95
  -4 -22  -3    0.12    4.71
  -5 -22  -3    2.00    4.66
   5 -22   3    0.87   11.83
  -6 -22  -3    0.79    5.33
   6 -22   3    8.80   11.95
   6 -22   3    0.05    4.12
   7 -22   3   16.41   12.03
   4 -23  -3    4.84    4.58
   4 -23  -3    5.93   12.28
   3 -23  -3    1.19   12.24
   3 -23  -3    2.87    4.16
   2 -23  -3    1.11    4.29
   1 -23  -3    6.95    4.66
  -1 -23   3   10.07    4.87
   1 -23  -3   13.08   11.24
   0 -23   3    9.60    4.71
   1 -23   3    1.13   13.45
   1 -23   3    0.25    4.46
   2 -23   3    0.66   13.16
   2 -23   3    0.01    4.37
   3 -23   3    5.49    4.41
   3 -23   3    6.52   12.70
   4 -23   3   15.06    4.58
   4 -23   3   21.82   13.62
  20   0  -4    7.63    6.33
 -18   0   4    1.44    1.58
  18   0  -4    2.45    5.54
  16   0  -4   35.35    5.45
 -14   0   4  136.51    3.33
 -10   0   4    1.10    0.58
  10   0  -4    0.70    2.46
   8   0  -4 1383.84   26.82
  -6   0   4  251.40    4.75
  -6   0   4  253.51    3.41
  -4   0   4   48.27    2.75
  -4   0   4   47.92    2.00
  -2   0   4 1272.14   23.98
   0   0   4  405.61    0.25
   0   0  -4  408.87    0.25
   0   0  -4  407.33    0.46
   0   0   4  405.61    0.42
   2   0   4   20.06    0.29
   2   0   4   20.67    0.42
   2   0   4   20.40    1.58
  -2   0  -4   20.80    0.42
   4   0   4  946.55   29.11
   4   0   4  955.55   29.94
  -4   0  -4  951.80   29.11
  -4   0  -4  964.02   29.15
  -6   0  -4  240.51    7.83
   6   0   4  244.41    9.08
   8   0   4   43.66    1.50
  -8   0  -4   43.85    1.29
 -10   0  -4   22.27    0.87
  10   0   4   23.12    1.46
  10   0   4   19.77    3.16
  12   0   4    8.02    3.87
 -12   0  -4    8.91    1.21
  12   0   4   10.66    2.12
  14   0   4  141.40    8.16
  16   0   4    8.34    5.45
 -16   0  -4    6.90    1.33
  18   0   4    5.19    7.08
  20   0   4    0.34    7.41
  20  -1  -4    0.47    6.12
  20   1  -4    0.47    5.54
 -19  -1   4    8.92    1.67
  19  -1  -4    8.39    5.95
 -19   1   4    8.39    1.67
  18  -1  -4    1.13    5.45
 -18  -1   4    2.50    1.58
 -18   1   4    2.50    1.58
  17  -1  -4    4.64    5.45
  17   1  -4    3.04    4.66
  16  -1  -4    3.35    4.91
 -16   1   4    3.50    1.37
 -15  -1   4   14.48    0.83
 -15  -1   4   15.17    1.12
 -15   1   4   14.31    1.25
 -14  -1   4    0.23    1.04
  14  -1  -4    0.11    3.87
 -14   1   4    0.19    1.12
  13  -1  -4   17.44    4.12
  13   1  -4   17.50    3.46
 -12  -1   4   30.48    1.17
  12  -1  -4   33.89    4.12
 -12  -1   4   31.87    1.25
  12   1  -4   32.56    3.71
 -12   1   4   31.72    1.25
  10  -1  -4    7.53    3.00
 -10  -1   4    6.01    0.62
 -10  -1   4    5.97    0.92
 -10   1   4    5.00    0.67
  -9   1   4   99.36    1.67
  -8  -1   4    8.08    0.67
   8  -1  -4    7.98    2.58
  -8  -1   4    8.78    1.04
  -8   1   4    7.77    0.71
   8   1  -4    8.56    2.25
  -6  -1   4   71.98    2.71
  -6   1   4   71.94    1.54
  -6   1   4   72.65    1.33
  -5  -1   4 1000.01   22.07
  -5  -1   4 1000.94   21.94
   5  -1  -4  998.48   21.90
  -5  -1   4 1011.33   22.61
   5   1  -4 1010.40   22.44
  -5   1   4 1011.62   22.86
  -5   1   4  993.90   21.86
  -4  -1   4  259.82    7.04
   4  -1  -4  265.14    7.37
   4  -1  -4  259.60    6.54
  -4  -1   4  258.28    6.54
   4   1  -4  259.50    6.95
   3  -1  -4  283.64    4.21
  -3  -1   4  279.22    4.58
   3   1  -4  280.44    4.54
  -2  -1   4  167.32    7.91
   2  -1  -4  171.40    8.12
   1  -1  -4  325.42    3.12
  -1  -1   4  323.82    3.04
   1   1  -4  326.28    3.04
  -1   1   4  328.73    2.91
   0  -1   4   10.67    1.08
   0   1   4   10.71    0.58
   1  -1   4  220.07    2.42
  -1  -1  -4  217.88    1.50
   1  -1   4  219.33    1.33
   1  -1   4  216.53    1.33
   1   1   4  217.65    1.42
   1   1   4  218.74    1.50
   1   1   4  218.36    1.29
   2  -1   4   22.39    4.41
  -2  -1  -4   22.54    4.37
  -2  -1  -4   21.93    4.50
  -2  -1  -4   22.75    4.91
   2  -1   4   21.82    5.54
  -2   1  -4   21.92    4.46
  -2   1  -4   22.85    5.41
  -3  -1  -4  581.19   12.45
  -3  -1  -4  581.46   11.83
   3  -1   4  585.32   11.87
   3  -1   4  573.65   12.87
  -3   1  -4  583.57   11.87
  -3   1  -4  585.70   12.95
   4  -1   4    1.84    0.25
  -4  -1  -4    1.84    0.42
  -4  -1  -4    2.16    1.92
  -4  -1  -4    1.97    0.21
  -4   1  -4    1.99    2.21
   4   1   4    1.84    0.46
   4   1   4    1.95    0.21
   5  -1   4  305.15   11.58
   5  -1   4  304.45   12.66
  -6  -1  -4  180.48    3.66
   6  -1   4  177.74    5.12
   6   1   4  178.96    4.87
  -7  -1  -4   41.98    1.87
   7  -1   4   40.32    3.83
   7   1   4   39.90    3.58
  -8  -1  -4  703.72   12.70
   8  -1   4  698.06   14.24
   8   1   4  697.97   13.95
  -9  -1  -4   41.86    1.37
   9  -1   4   42.76    1.50
  -9   1  -4   43.25    1.25
 -10  -1  -4  113.68    2.33
 -10  -1  -4  112.65    2.37
  10  -1   4  116.44    5.16
  10   1   4  111.62    3.12
  10   1   4  115.94    4.91
 -10   1  -4  115.08    2.50
 -11  -1  -4  110.11    3.12
  11  -1   4  109.42    6.04
 -12  -1  -4  112.71    3.79
  12  -1   4  110.75    6.66
  12   1   4  114.31    6.87
  13  -1   4    5.01    7.66
 -13  -1  -4    5.28    0.92
  13   1   4    6.55    3.79
 -13   1  -4    5.85    0.96
 -13   1  -4    6.14    1.08
 -14  -1  -4    2.80    1.08
  14  -1   4    5.56    5.12
 -14  -1  -4    2.55    1.08
  14  -1   4    3.60    2.04
 -14   1  -4    1.85    0.96
  14   1   4    1.45    4.79
  15  -1   4   15.55    5.50
  15   1   4   14.20    5.08
 -15   1  -4   15.49    1.29
 -16  -1  -4    3.11    1.21
 -16  -1  -4    2.67    1.21
  16  -1   4    2.80    5.37
  16   1   4    4.18    5.29
 -17  -1  -4   35.80    1.67
  17  -1   4   39.15    6.33
 -17   1  -4   35.08    1.75
  17   1   4   40.75    6.00
  18   1   4    5.75    6.70
 -19  -1  -4    1.29    1.71
 -19   1  -4    2.05    1.83
  20  -2  -4    2.38    7.04
  20   2  -4    2.84    5.16
 -20   2   4    2.69    2.08
 -19  -2   4    5.44    1.62
  19   2  -4    9.91    5.08
 -18  -2   4    0.64    1.42
  18  -2  -4    1.06    6.04
 -18   2   4    0.64    1.79
  18   2  -4    0.64    4.50
 -17  -2   4   38.66    1.75
  17  -2  -4   38.93    6.33
  17   2  -4   36.76    4.62
 -16  -2   4    1.07    1.12
  16  -2  -4    0.61    4.75
  16   2  -4    1.57    3.96
 -15  -2   4   49.38    1.75
 -15  -2   4   49.59    1.58
 -15   2   4   51.11    1.96
 -14  -2   4    7.62    1.25
 -14  -2   4    8.21    1.04
 -13  -2   4    1.46    1.12
  13  -2  -4    1.13    3.79
  13   2  -4    1.40    3.00
 -13   2   4    1.02    1.08
 -12  -2   4   25.23    1.21
 -12  -2   4   24.37    1.54
 -12   2   4   25.92    1.42
  12   2  -4   27.93    3.54
 -11  -2   4   13.92    1.37
  11  -2  -4   14.60    3.58
 -11  -2   4   12.79    0.87
  11   2  -4   15.44    2.83
 -10  -2   4  103.38    2.29
  10  -2  -4  107.17    4.58
 -10  -2   4  106.12    2.04
 -10   2   4  103.15    2.12
  -9  -2   4    0.75    0.58
   9   2  -4    0.75    1.79
  -9   2   4    0.75    0.62
   8  -2  -4   16.17    2.87
  -8  -2   4   16.08    0.67
  -8  -2   4   13.87    2.66
   8   2  -4   15.62    1.92
  -7  -2   4   25.80    0.71
  -7   2   4   25.15    0.75
  -6  -2   4   58.70    1.54
  -6  -2   4   59.65    0.96
   6  -2  -4   58.34    2.08
  -6  -2   4   58.53    0.46
   6   2  -4   59.40    1.25
   5  -2  -4  454.86   13.53
  -5  -2   4  444.14   13.78
  -5  -2   4  445.93   14.12
  -5   2   4  451.41   13.57
  -5   2   4  441.78   14.66
   5   2  -4  444.18   13.95
  -3  -2   4  405.82    5.58
  -3   2   4  410.70    5.29
   3   2  -4  409.04    5.50
  -3   2   4  405.79    6.08
  -2  -2   4  187.07    3.66
   2  -2  -4  183.28    3.50
   2  -2  -4  187.17    4.12
  -2   2   4  184.18    3.46
  -2   2   4  182.22    4.04
   1  -2  -4    8.11    0.12
  -1  -2   4    8.72    0.54
   1  -2  -4    8.72    0.29
  -1   2   4    8.36    0.71
   0  -2  -4  232.54    8.20
   0  -2   4  232.44    8.54
   0  -2  -4  225.89    8.08
   0   2   4  227.91    8.20
  -1  -2  -4  289.76    4.91
  -1  -2  -4  288.55    4.96
   1   2   4  288.16    4.96
   2  -2   4  188.45    9.29
  -2  -2  -4  184.41    8.12
   3  -2   4   54.50    0.54
   3   2   4   51.64    1.96
   4  -2   4   10.98    2.12
  -4  -2  -4   13.32    0.75
   4  -2   4   12.58    0.33
  -4  -2  -4   12.47    0.33
  -4   2  -4   12.94    0.46
   4   2   4   13.48    0.75
   4   2   4   12.03    1.75
  -4   2  -4   13.13    0.42
  -5  -2  -4    2.00    1.87
  -5  -2  -4    1.58    0.37
  -5  -2  -4    0.88    0.67
   5  -2   4    1.93    2.25
   5   2   4    1.18    1.54
   5   2   4    1.37    0.75
  -5   2  -4    1.20    0.46
   6  -2   4   32.87    2.58
  -6  -2  -4   32.05    0.46
  -6  -2  -4   32.64    0.87
   6   2   4   31.15    1.00
  -6   2  -4   32.54    0.58
  -6   2  -4   31.71    0.54
  -7  -2  -4   29.49    1.50
   7  -2   4   28.41    1.21
   7   2   4   28.25    1.75
  -7   2  -4   29.38    1.37
   8  -2   4   10.20    3.25
  -8  -2  -4   11.71    1.37
  -8   2  -4   11.61    1.33
   9  -2   4   55.71    4.12
  -9  -2  -4   56.21    1.75
  -9   2  -4   56.32    1.75
  10   2   4  143.10    4.58
 -10   2  -4  142.61    2.46
 -11  -2  -4   23.27    1.21
  11  -2   4   23.88    1.33
 -11  -2  -4   23.10    0.92
  11   2   4   25.21    3.62
 -12  -2  -4   52.71    1.12
 -12   2  -4   52.52    1.08
  12   2   4   49.19    3.79
 -12   2  -4   51.03    1.21
  13  -2   4   61.64    2.29
  13  -2   4   65.85    6.12
 -13  -2  -4   60.65    2.25
  13   2   4   61.80    5.08
 -14  -2  -4    9.93    1.33
  14  -2   4    8.42    5.20
  14  -2   4   10.06    1.87
 -15  -2  -4   29.16    1.37
  15   2   4   26.24    4.87
 -15   2  -4   29.16    1.50
  16  -2   4   10.04    6.12
 -16  -2  -4   11.56    1.46
  16   2   4   12.63    5.12
  18  -2   4   14.05    7.29
  18   2   4    9.67    6.04
  19  -2   4    4.69    7.87
  19   2   4    6.41    6.41
  20  -2   4    5.66    8.37
 -20   2  -4    0.50    3.16
  20  -3  -4    0.01    7.25
  20   3  -4    0.01    4.75
  19   3  -4    0.27    4.66
 -19   3   4    0.23    2.00
 -18  -3   4   20.22    1.62
  18  -3  -4   24.12    6.50
 -18   3   4   19.50    1.92
  17  -3  -4    9.38    5.37
  17   3  -4    7.17    3.96
  16  -3  -4    5.35    5.54
 -16  -3   4    3.62    1.33
 -16  -3   4    3.81    1.21
 -16   3   4    3.58    1.46
  15  -3  -4   16.59    5.33
 -15  -3   4   13.29    1.25
 -15  -3   4   12.93    1.62
 -15   3   4   13.10    1.58
 -14  -3   4    5.06    0.96
  14  -3  -4    7.85    4.58
 -14  -3   4    5.57    1.46
  14   3  -4    6.50    2.83
 -13  -3   4   34.94    1.54
  13  -3  -4   35.31    4.46
 -13  -3   4   34.47    1.04
  13   3  -4   36.92    3.04
  12  -3  -4  134.75    6.33
  12   3  -4  130.07    4.71
 -12   3   4  128.62    3.46
 -11  -3   4    7.08    1.37
 -11  -3   4    7.50    0.71
  11  -3  -4    7.18    3.37
  11   3  -4    8.61    2.29
 -10  -3   4    6.03    1.25
 -10   3   4    6.47    0.79
  10   3  -4    6.98    1.87
  -9  -3   4   84.01    1.62
  -9  -3   4   83.43    2.08
  -8  -3   4    2.55    2.17
   8  -3  -4    1.22    2.37
  -8  -3   4    1.24    1.04
  -8   3   4    1.37    0.58
  -7  -3   4  233.63    2.29
   7  -3  -4  235.87    4.25
  -7  -3   4  231.13    2.62
   7   3  -4  234.79    2.87
  -7   3   4  233.09    2.33
  -6  -3   4  495.62    7.04
   6   3  -4  498.54    6.70
  -6   3   4  500.23    6.37
  -5  -3   4  272.25    8.29
   5  -3  -4  277.78    9.24
  -5  -3   4  272.66    8.41
   5  -3  -4  269.94    7.87
  -5   3   4  270.76    7.91
   4  -3  -4   20.48    1.87
   4  -3  -4   19.95    0.42
  -4  -3   4   21.00    1.12
  -4   3   4   19.55    0.46
  -4   3   4   18.94    2.00
   3  -3  -4   21.02    0.54
  -3  -3   4   21.85    0.79
   3  -3  -4   21.15    0.46
  -3   3   4   19.44    1.58
  -3   3   4   20.83    0.62
  -3   3   4   20.88    0.50
   2  -3  -4    2.24    0.21
   2  -3  -4    2.24    0.42
   1  -3  -4  240.24    5.91
   1   3  -4  247.24    6.41
  -1   3   4  242.48    6.29
   0  -3  -4   53.97    4.04
   0   3   4   53.17    4.16
   1  -3   4   63.68    3.08
  -1  -3  -4   64.92    1.29
   1   3   4   65.28    1.25
  -1   3  -4   66.63    2.75
   2  -3   4    8.39    3.96
  -2  -3  -4    7.96    2.21
   2   3   4    7.69    2.00
  -2   3  -4    7.46    3.79
   4  -3   4   51.10    0.67
  -4  -3  -4   51.20    1.46
  -4  -3  -4   49.92    1.08
   4  -3   4   47.58    2.25
  -4   3  -4   50.59    0.79
   5  -3   4  782.96   18.11
  -5  -3  -4  787.32   17.24
  -5  -3  -4  787.35   16.78
   5   3   4  789.98   17.32
  -5   3  -4  774.28   16.82
  -6  -3  -4  216.54    4.54
  -6  -3  -4  217.81    3.54
  -6  -3  -4  213.66    3.83
   6  -3   4  218.40    5.29
  -6   3  -4  213.97    3.58
   7  -3   4  217.73    6.25
   7  -3   4  221.77    4.12
  -7   3  -4  221.59    4.29
  -8  -3  -4    3.06    2.54
  -8  -3  -4    0.85    0.50
  -8   3  -4    1.06    0.62
  -9  -3  -4  119.34    3.16
   9  -3   4  126.10    6.25
   9   3   4  123.87    4.66
 -10  -3  -4   29.78    1.46
  10  -3   4   28.92    4.08
 -10  -3  -4   29.66    1.00
  10  -3   4   30.37    1.17
  10   3   4   32.27    3.21
 -11  -3  -4  164.10    2.71
 -11   3  -4  160.12    2.91
  11   3   4  166.02    5.20
 -12  -3  -4  102.21    2.75
 -12  -3  -4  103.10    2.62
  12  -3   4  102.32    6.29
  12   3   4  104.38    5.29
 -12   3  -4  100.51    2.83
  13  -3   4   21.79    4.62
  13  -3   4   19.60    1.37
 -13  -3  -4   20.82    1.04
  14  -3   4   42.06    5.41
 -14  -3  -4   39.03    1.21
 -14   3  -4   38.57    1.46
 -15  -3  -4    5.72    1.50
 -15  -3  -4    5.60    1.12
 -15   3  -4    5.58    1.21
 -16  -3  -4    0.77    1.12
 -16  -3  -4    0.87    1.50
  16   3   4    0.77    9.62
 -16   3  -4    0.79    1.37
  17  -3   4   43.52    7.12
 -17  -3  -4   39.46    2.25
  18  -3   4    5.66    6.87
  18   3   4    1.38    5.41
 -19  -3  -4    9.75    1.67
  19   3   4    8.91    6.08
 -19   3  -4   10.72    1.83
  19  -4  -4    1.00    7.12
 -19  -4   4    1.90    1.62
  18  -4  -4    5.96    6.33
 -18  -4   4    1.51    1.42
  18   4  -4    0.61    3.91
  17  -4  -4   38.55    6.54
 -17  -4   4   42.09    1.83
 -16  -4   4    1.37    1.12
 -16  -4   4    1.13    1.71
  16  -4  -4    1.55    5.33
  16   4  -4    1.13    3.91
 -16   4   4    1.13    1.58
 -15  -4   4    2.59    1.71
 -15  -4   4    2.57    1.04
  15   4  -4    3.66    2.75
 -14  -4   4   11.51    1.04
  14  -4  -4   11.47    5.00
 -14  -4   4   12.58    1.83
  14   4  -4   12.92    2.71
  13   4  -4    0.04    2.12
 -12  -4   4   37.62    1.29
  12  -4  -4   38.88    4.62
 -12  -4   4   36.96    2.17
  12   4  -4   38.96    2.62
 -11  -4   4    6.26    1.46
  11   4  -4    6.26    1.71
 -10  -4   4    6.51    1.29
  10   4  -4    6.85    1.58
 -10   4   4    6.51    0.79
  -9  -4   4   24.71    0.92
  -9   4   4   24.02    1.00
  -8  -4   4  292.52    5.91
  -8  -4   4  289.32    7.04
   8  -4  -4  287.99    7.91
   8   4  -4  288.37    6.33
   7  -4  -4  139.09    5.08
  -7  -4   4  139.75    4.29
   7   4  -4  135.72    3.62
   6  -4  -4   47.36    2.58
  -6  -4   4   45.15    1.37
  -6  -4   4   45.09    1.46
  -6   4   4   44.50    0.67
   6   4  -4   45.78    1.04
  -5  -4   4    6.06    1.21
   5  -4  -4    6.55    0.71
   5  -4  -4    5.66    2.25
  -5  -4   4    6.17    1.33
  -5   4   4    6.36    0.67
  -5   4   4    6.54    0.75
   5   4  -4    5.74    0.96
  -4  -4   4  380.57    4.37
  -4   4   4  380.84    4.25
  -4   4   4  383.01    5.70
   4   4  -4  380.46    4.29
   3  -4  -4  192.51    3.54
  -3  -4   4  190.70    2.79
  -3  -4   4  189.82    2.42
   3  -4  -4  192.07    2.25
  -3   4   4  190.75    3.71
  -3   4   4  190.70    2.46
   3   4  -4  190.98    2.46
   2  -4  -4 1580.88   32.06
  -2  -4   4 1573.06   32.19
   2  -4  -4 1565.69   32.19
  -2  -4   4 1579.97   32.52
  -2   4   4 1602.72   32.85
  -1  -4   4 4267.40   88.23
   1   4  -4 4278.55   88.11
   0  -4  -4  329.31    6.87
   0   4   4  327.33    7.08
   0   4  -4  326.93    7.66
  -1  -4  -4   11.22    0.71
  -1  -4  -4   11.76    0.58
   1   4   4   11.70    0.75
   1   4   4   12.16    0.71
   2  -4   4  470.71   13.53
  -2  -4  -4  465.98   12.66
   3  -4   4  445.06    8.70
  -3  -4  -4  441.73    8.99
   3   4   4  445.25    8.95
   3   4   4  440.55    8.70
  -4  -4  -4  330.32    7.25
   4  -4   4  335.97    8.33
   4   4   4  339.74    7.37
   5  -4   4  505.90   12.74
   5  -4   4  508.66   14.32
   5   4   4  509.76   13.16
  -6  -4  -4  201.23    5.62
   6  -4   4  196.24    6.79
  -6  -4  -4  199.31    5.04
  -6  -4  -4  198.58    5.45
   7  -4   4   48.08    2.83
  -7  -4  -4   49.68    1.96
  -7  -4  -4   50.84    1.25
  -7  -4  -4   49.66    0.58
  -8  -4  -4  203.01    3.58
  -8  -4  -4  204.27    4.04
   8  -4   4  202.00    3.46
   8  -4   4  201.22    5.75
  -9  -4  -4  103.49    4.37
   9   4   4  103.11    3.87
  10  -4   4    3.14    3.83
  10   4   4    1.31    2.62
  11  -4   4   48.60    1.37
 -11  -4  -4   50.27    1.29
  11   4   4   51.81    3.54
  12  -4   4   43.82    1.71
  12  -4   4   45.21    5.37
 -13  -4  -4   11.53    0.92
 -13  -4  -4   11.00    1.50
  13  -4   4   10.12    1.25
  13  -4   4   14.14    5.00
 -13   4  -4   10.81    1.04
  13   4   4   13.53    3.33
 -14  -4  -4   26.56    1.46
  14  -4   4   26.75    5.66
 -15  -4  -4    1.92    1.58
 -15  -4  -4    1.81    1.12
  15   4   4    0.61    4.16
 -15   4  -4    2.51    1.29
  16  -4   4   59.76    6.54
 -16  -4  -4   56.54    1.62
  16   4   4   54.70    4.71
 -17   4  -4   16.54    1.54
 -18  -4  -4    2.20    1.50
  18  -4   4    3.89    6.45
  18   4   4    5.45    5.00
 -18   4  -4    3.62    1.87
  19  -4   4    0.04    7.58
 -19  -4  -4    0.04    1.58
 -19   4  -4    0.04    1.83
  19   4   4    0.21    5.79
  19  -5  -4    1.58    7.12
  19   5  -4    1.17    5.70
 -18  -5   4    5.65    1.50
  18  -5  -4    4.47    6.50
  18   5  -4    6.49    3.62
 -17  -5   4    1.40    1.25
  17  -5  -4    2.72    5.83
 -17  -5   4    0.17    2.17
 -16  -5   4    0.85    2.12
  16  -5  -4    1.98    5.37
 -16  -5   4    0.85    1.08
  16   5  -4    0.85    2.79
  15  -5  -4   28.77    5.08
 -15  -5   4   27.50    1.21
 -15  -5   4   26.36    2.12
  15   5  -4   29.29    2.75
 -14  -5   4    2.73    1.92
  14  -5  -4    1.63    4.79
 -13  -5   4   65.47    2.54
  13  -5  -4   60.83    4.75
  13   5  -4   63.36    2.75
 -12  -5   4    2.79    1.83
 -12  -5   4    2.49    0.87
  12  -5  -4    6.41    4.21
  12   5  -4    1.42    1.75
  11  -5  -4   23.62    3.71
 -11  -5   4   21.51    0.92
 -11  -5   4   22.55    1.75
 -11   5   4   20.65    0.92
 -10  -5   4  108.49    2.75
 -10   5   4  110.53    2.29
  -9  -5   4   58.39    1.58
   9  -5  -4   56.83    3.91
  -9  -5   4   59.59    2.21
  -9   5   4   59.55    1.67
  -8  -5   4    3.09    2.04
  -8  -5   4    2.16    1.33
   8   5  -4    1.79    1.00
  -8   5   4    1.38    0.62
   7  -5  -4   38.92    4.12
  -7  -5   4   35.97    2.42
  -7  -5   4   36.77    2.66
   7   5  -4   37.40    1.96
  -7   5   4   37.23    1.79
  -6  -5   4   32.81    2.58
  -6  -5   4   33.13    2.71
   6  -5  -4   35.47    4.25
   6  -5  -4   33.47    1.92
  -6   5   4   34.98    2.08
   6   5  -4   33.97    2.21
   5  -5  -4    7.61    2.08
  -5  -5   4    6.85    1.12
  -5  -5   4    7.00    0.83
   5  -5  -4    7.88    0.58
  -5   5   4    7.34    0.42
   5   5  -4    7.65    0.75
  -5   5   4    6.64    0.67
  -4  -5   4  125.15    2.71
   4  -5  -4  124.27    3.50
   4  -5  -4  123.64    1.96
  -4   5   4  124.19    2.17
  -3  -5   4  539.79    9.04
   3  -5  -4  542.91    9.54
  -3  -5   4  537.94    8.58
  -3  -5   4  541.29    8.91
  -3   5   4  534.27    9.62
  -3   5   4  534.86    8.66
  -2  -5   4   90.62    3.66
   2  -5  -4   88.89    3.33
   2  -5  -4   91.44    4.04
  -2   5   4   90.78    4.33
  -2   5   4   89.18    3.33
   1  -5  -4  550.00   13.49
  -1   5   4  551.64   13.66
   0  -5  -4  427.45   10.62
   0  -5  -4  420.10   10.41
   0  -5   4  423.96   11.20
   0   5   4  426.12   10.74
  -1  -5  -4  639.91    9.58
  -1  -5  -4  650.68    9.54
   1   5   4  648.19    9.66
   1   5   4  640.94    9.58
  -2  -5  -4  269.75    5.33
   2  -5   4  268.67    6.41
   2   5   4  269.96    5.16
   2   5   4  268.92    5.33
   3  -5   4   76.77    4.46
  -3  -5  -4   78.75    3.29
   3   5   4   77.54    2.91
  -3   5  -4   80.11    5.08
   4  -5   4  548.01    8.99
  -4  -5  -4  549.02    7.74
   4   5   4  544.66    7.29
  -5  -5  -4  177.56    3.87
   6  -5   4   37.80    3.33
   6  -5   4   36.83    0.87
   6   5   4   36.31    1.58
  -7  -5  -4  194.03    3.71
  -7  -5  -4  189.75    4.25
   7   5   4  193.12    4.37
  -8  -5  -4   57.28    1.37
  -8  -5  -4   56.58    2.00
   8   5   4   56.46    2.25
  -9  -5  -4    6.68    2.29
  -9  -5  -4    6.28    1.50
  -9  -5  -4    5.50    0.67
   9  -5   4    5.26    3.41
   9   5   4    4.91    2.00
  10  -5   4   16.78    0.83
 -10  -5  -4   16.42    1.75
 -10  -5  -4   17.94    2.91
  10  -5   4   15.56    4.37
  10   5   4   17.62    2.33
 -10   5  -4   15.81    1.00
  11  -5   4    8.46    4.71
  11  -5   4    8.92    1.08
 -11  -5  -4    8.88    1.96
 -11  -5  -4    7.79    1.04
 -11   5  -4    7.22    1.25
  11   5   4    8.37    2.75
 -12  -5  -4   14.94    1.08
  12  -5   4   13.42    1.08
  12  -5   4   16.23    4.87
  12   5   4   15.55    3.08
 -12   5  -4   13.46    1.29
 -13  -5  -4    1.78    1.75
 -13  -5  -4    0.81    0.87
  13   5   4    1.04    2.91
 -13   5  -4    0.91    1.21
  14  -5   4   25.24    5.70
 -14  -5  -4   21.49    1.17
 -14  -5  -4   22.79    2.04
  14   5   4   21.53    3.41
 -15  -5  -4    0.12    1.04
 -15   5  -4    0.29    1.42
  16  -5   4    9.57    6.25
 -16  -5  -4    6.87    1.25
  16   5   4    8.81    4.16
  17  -5   4    0.53    6.20
 -17  -5  -4    0.53    1.29
 -17   5  -4    0.53    1.58
  17   5   4    0.53    4.00
  18  -5   4    4.60    7.04
 -18  -5  -4    2.57    1.33
 -18   5  -4    2.57    1.62
  18   5   4    2.57    7.74
  19  -5   4    1.24    8.41
 -19  -5  -4    1.24    1.58
 -19   5  -4    1.91    1.92
  19  -6  -4    3.55    6.50
 -19  -6   4    3.89    1.62
  18  -6  -4    2.55    6.33
 -18  -6   4    3.10    1.37
 -18   6   4    2.55    2.00
 -17  -6   4    1.27    2.54
 -17  -6   4    1.02    1.29
 -16  -6   4    4.60    2.46
  16   6  -4    4.60    2.50
 -16   6   4    4.60    1.71
  15  -6  -4    5.77    5.20
 -15  -6   4    2.44    1.04
 -14  -6   4   39.68    1.37
  14  -6  -4   39.87    5.41
 -13  -6   4   26.58    2.29
 -13  -6   4   26.94    1.21
 -13   6   4   24.71    1.50
  13   6  -4   26.39    2.08
 -12  -6   4    1.83    0.83
  12  -6  -4    4.22    4.00
  12   6  -4    1.83    1.54
 -12   6   4    2.00    1.08
 -11  -6   4   37.27    2.54
  11   6  -4   36.49    2.00
 -10  -6   4    4.01    1.79
  10  -6  -4    4.46    3.75
 -10  -6   4    4.18    3.04
 -10  -6   4    4.16    0.87
 -10   6   4    4.20    1.21
  10   6  -4    4.25    1.37
   9  -6  -4   55.15    3.91
   9   6  -4   56.26    1.75
   8  -6  -4    9.25    3.04
  -8  -6   4    8.47    1.42
  -8   6   4    8.47    0.71
   8   6  -4    8.45    0.96
  -7  -6   4  631.93   10.58
  -7  -6   4  623.02   10.58
   7  -6  -4  635.64   11.99
  -6  -6   4   30.14    1.79
   6  -6  -4   30.06    3.08
  -6  -6   4   28.77    1.33
   6   6  -4   28.54    1.12
  -5  -6   4    2.41    1.25
   5  -6  -4    2.60    0.71
  -5  -6   4    2.41    0.79
  -5  -6   4    2.41    1.42
   4  -6  -4   60.41    4.58
   4  -6  -4   59.99    2.87
   3  -6  -4  150.62    3.37
   3  -6  -4  150.92    4.41
  -3  -6   4  150.68    3.25
   3  -6  -4  151.82    3.08
  -3   6   4  150.66    3.41
   2  -6  -4  123.45    4.66
  -2  -6   4  121.50    4.12
   2  -6  -4  118.67    3.75
  -2   6   4  123.60    4.91
  -2   6   4  119.45    3.83
   2   6  -4  122.08    4.25
   1  -6  -4  172.29    5.45
  -1  -6   4  177.09    5.62
  -1  -6   4  172.16    6.25
   1   6  -4  178.59    6.12
  -1   6   4  178.97    6.20
   0  -6  -4   26.24    1.67
   0  -6   4   25.59    2.54
   0   6   4   27.67    2.04
   0   6  -4   27.94    2.54
   1  -6   4  366.20   10.04
   1   6   4  373.89    9.37
  -1   6  -4  373.74   10.20
  -2  -6  -4   35.92    1.62
  -2  -6  -4   35.64    1.08
   2  -6   4   35.45    2.79
  -3  -6  -4  271.09    4.71
  -3  -6  -4  273.34    4.12
   3   6   4  272.59    4.37
  -4  -6  -4   92.67    1.67
   4  -6   4   89.74    3.00
   4   6   4   91.03    0.96
  -5  -6  -4   76.27    2.21
   5  -6   4   78.42    4.00
  -6  -6  -4   53.38    1.62
   6  -6   4   54.21    3.16
   6   6   4   52.35    0.62
   7  -6   4  143.34    4.46
   7  -6   4  139.92    1.46
  -7  -6  -4  141.21    2.50
   7   6   4  140.81    2.04
   7   6   4  141.69    1.58
  -8  -6  -4   35.91    1.79
   8  -6   4   34.99    3.71
  -8  -6  -4   36.38    1.50
   8   6   4   37.39    1.58
  -9  -6  -4  252.18    5.45
  -9  -6  -4  256.94    4.79
   9   6   4  252.63    5.29
 -10  -6  -4   78.54    2.04
  10  -6   4   79.99    1.71
 -10  -6  -4   80.86    3.41
  10  -6   4   83.45    5.54
 -10  -6  -4   82.27    3.04
  10   6   4   80.50    2.96
 -11  -6  -4  147.81    4.83
  11  -6   4  148.26    6.62
 -11   6  -4  152.05    3.58
  11   6   4  153.77    4.33
 -12  -6  -4    6.90    1.83
  12  -6   4    5.83    0.92
  12   6   4    6.75    2.33
 -12   6  -4    5.93    1.04
 -13  -6  -4    1.75    0.96
  13   6   4    0.57    2.62
  14  -6   4   22.69    5.62
 -14   6  -4   24.65    1.42
  14   6   4   25.05    2.91
 -15  -6  -4   59.82    2.75
  15   6   4   61.31    3.71
 -16  -6  -4    2.54    2.12
  16  -6   4    0.50    6.50
 -16  -6  -4    2.54    1.29
 -16   6  -4    0.84    1.50
  16   6   4    0.50    3.29
  17  -6   4   19.68    6.79
 -17   6  -4   20.99    1.92
  17   6   4   21.41    3.91
 -18  -6  -4    1.93    1.50
  18  -6   4    0.29    7.29
 -18   6  -4    0.29    1.92
  19  -6   4    2.86    8.29
 -19  -6  -4    2.68    1.58
  19  -7  -4    5.13    7.62
 -19  -7   4    0.22    1.54
 -19   7   4    0.15    2.29
 -18  -7   4    4.68    1.42
  18  -7  -4    4.98    6.66
 -18   7   4    5.31    2.25
 -17  -7   4   22.98    1.42
 -17  -7   4   21.78    2.79
  17  -7  -4   25.82    6.87
  17   7  -4   20.37    3.58
 -16  -7   4   29.77    1.33
 -16  -7   4   27.70    2.71
  16   7  -4   27.20    2.42
  15  -7  -4    0.33    4.96
 -15  -7   4    0.33    1.04
 -14  -7   4    2.04    2.58
  14  -7  -4    2.04    4.75
 -13  -7   4   19.84    1.04
 -13  -7   4   18.46    2.37
  13  -7  -4   21.13    4.66
  13   7  -4   20.81    1.79
 -13   7   4   18.73    1.29
 -12  -7   4   14.68    0.96
  12  -7  -4   17.08    4.29
 -12  -7   4   12.69    2.00
 -12   7   4   14.13    1.17
  12   7  -4   14.70    1.54
  11  -7  -4   11.41    4.21
 -11  -7   4   10.75    2.12
 -11   7   4    8.77    1.33
  11   7  -4    9.97    1.58
  10  -7  -4   53.24    4.37
 -10  -7   4   54.00    3.12
 -10  -7   4   52.76    2.33
  10   7  -4   54.42    1.67
  -9   7   4   77.85    1.79
   9   7  -4   77.72    1.87
   8  -7  -4   55.79    4.58
  -8  -7   4   51.70    2.54
  -8   7   4   52.21    1.75
  -7  -7   4    5.24    1.54
  -7  -7   4    5.07    1.87
   7  -7  -4    6.50    1.04
   7  -7  -4    4.65    3.08
   7   7  -4    6.14    1.25
  -6  -7   4    1.35    1.54
   6  -7  -4    1.35    2.62
  -6  -7   4    1.31    1.00
  -6  -7   4    1.35    1.46
  -5  -7   4    9.41    1.46
   5  -7  -4    9.41    0.83
  -5  -7   4   10.27    1.67
  -5   7   4    9.41    1.00
  -4  -7   4    7.37    1.79
   4  -7  -4    9.88    2.37
  -4  -7   4    7.45    0.71
   4  -7  -4    8.21    0.92
   3  -7  -4   25.19    2.21
   3  -7  -4   24.12    1.17
  -3  -7   4   24.58    2.12
   3  -7  -4   24.24    0.62
  -3   7   4   24.75    1.29
  -2  -7   4  184.55    3.50
   2   7  -4  187.27    3.25
  -2   7   4  187.27    4.25
  -2   7   4  186.28    2.66
  -1  -7   4    9.45    2.17
  -1  -7   4    9.21    1.29
   1  -7  -4    8.22    1.12
   1   7  -4    9.57    2.17
  -1   7   4    9.13    2.04
   0  -7  -4  378.45    7.50
   0  -7   4  374.41    8.04
   0  -7   4  374.60    7.37
   1  -7   4   36.93    2.62
  -1  -7  -4   39.33    1.46
   1  -7   4   36.17    1.54
  -1  -7  -4   35.81    1.46
  -1   7  -4   34.80    2.91
  -2  -7  -4   13.60    1.25
   2  -7   4   12.51    2.33
  -2  -7  -4   13.12    0.87
   2   7   4   14.32    1.37
  -3  -7  -4   28.86    0.92
   3  -7   4   29.01    3.00
  -3  -7  -4   30.40    1.71
  -4  -7  -4  226.85    4.71
   4  -7   4  223.00    6.20
   5  -7   4  118.03    4.41
  -5  -7  -4  117.19    3.04
  -6  -7  -4   16.25    1.87
   6  -7   4   18.23    3.50
   7  -7   4   23.80    1.21
   7  -7   4   21.50    3.50
  -7  -7  -4   24.32    2.25
  -8  -7  -4  180.56    3.00
  -8  -7  -4  179.03    3.91
   9  -7   4   29.23    0.67
  -9  -7  -4   30.27    1.87
  -9  -7  -4   29.04    0.79
   9   7   4   28.12    0.96
  10  -7   4   57.45    5.04
  10  -7   4   55.15    1.17
  11  -7   4    4.46    5.00
 -11  -7  -4    0.81    0.87
 -11  -7  -4    1.36    2.21
  11   7   4    0.81    1.42
 -12  -7  -4   16.63    0.96
 -12  -7  -4   15.09    2.46
 -12   7  -4   16.83    1.29
  12   7   4   15.95    1.79
 -13  -7  -4    6.14    1.04
 -13  -7  -4    5.55    2.17
  13  -7   4    7.89    5.16
  13   7   4    6.36    1.92
 -13   7  -4    5.87    1.21
 -14  -7  -4   16.52    1.12
  14  -7   4   15.13    5.37
 -15  -7  -4    2.11    1.25
 -15  -7  -4    1.22    2.33
  15   7   4    1.22    2.42
 -15   7  -4    1.22    1.42
 -16  -7  -4   37.42    2.71
 -16  -7  -4   39.20    1.46
 -17  -7  -4    3.76    2.46
 -17  -7  -4    3.28    1.42
 -18  -7  -4    8.08    1.58
 -19  -7  -4    2.41    1.71
 -19  -8   4    2.46    2.79
  19  -8  -4    3.89    7.83
 -19   8   4    1.42    2.54
  18  -8  -4    0.62    6.91
 -18  -8   4    0.60    3.21
 -18  -8   4    0.60    1.54
 -17  -8   4    6.12    1.50
 -16  -8   4    7.38    3.04
  16  -8  -4    6.50    5.70
 -16  -8   4    7.42    1.25
 -15  -8   4    1.67    1.12
 -15  -8   4    0.57    2.62
  15  -8  -4    4.79    5.54
 -14  -8   4   14.18    2.58
 -14  -8   4   16.12    1.21
 -14   8   4   14.88    1.46
 -13  -8   4   20.90    3.21
  13  -8  -4   20.12    5.29
 -13  -8   4   18.44    1.12
  13   8  -4   17.28    1.79
 -13   8   4   18.61    1.50
  12  -8  -4    4.61    5.04
 -12  -8   4    2.00    1.00
 -12  -8   4    1.56    2.33
  12   8  -4    1.56    1.54
 -12   8   4    2.61    1.25
  11  -8  -4   35.07    4.62
  11   8  -4   31.95    1.58
 -10  -8   4   19.20    2.21
  10  -8  -4   20.20    4.00
 -10   8   4   18.99    1.08
   9  -8  -4   28.13    3.79
  -9  -8   4   27.68    2.46
  -9  -8   4   25.87    2.17
   9  -8  -4   27.39    0.96
   9   8  -4   28.87    1.50
  -8  -8   4   20.57    2.21
   8  -8  -4   20.92    1.25
  -8  -8   4   22.46    2.54
   8  -8  -4   21.01    3.87
  -7  -8   4    0.94    1.79
   7  -8  -4    0.06    2.75
  -7  -8   4    0.06    1.75
   7  -8  -4    0.27    0.92
  -7  -8   4    0.06    1.29
  -6  -8   4    7.80    1.08
  -6  -8   4    6.98    1.79
  -6  -8   4    8.77    1.87
  -5  -8   4  101.97    3.50
   5  -8  -4  104.01    4.50
   5  -8  -4   99.74    2.75
  -5  -8   4  101.76    2.54
  -5   8   4  103.72    2.91
   4  -8  -4   29.58    1.83
  -4  -8   4   28.56    1.46
  -4  -8   4   29.60    2.62
   4  -8  -4   30.61    3.37
  -3  -8   4    1.94    1.50
   3  -8  -4    3.54    1.17
   3  -8  -4    3.54    2.12
  -3   8   4    2.45    1.33
   2  -8  -4    8.88    2.12
  -2  -8   4    8.81    2.29
  -2  -8   4    9.26    1.67
   2   8  -4    9.63    2.04
  -1  -8   4  175.56    4.91
  -1  -8   4  178.70    4.16
   1  -8  -4  177.08    4.71
   1   8  -4  177.92    5.00
   0  -8  -4  209.99    2.75
   0  -8  -4  212.96    3.29
   0  -8   4  212.05    3.00
   0   8  -4  214.89    4.29
   0   8   4  212.01    3.87
  -1  -8  -4   19.46    1.92
   1  -8   4   20.49    1.87
   1  -8   4   19.98    3.00
  -2  -8  -4   96.10    2.21
  -2  -8  -4   96.33    1.83
   2  -8   4   99.05    2.29
  -3  -8  -4   53.87    1.75
   3  -8   4   55.85    1.67
  -3  -8  -4   54.42    1.08
   3   8   4   55.97    1.71
  -4  -8  -4   36.71    2.04
   4  -8   4   36.12    3.71
   4   8   4   35.96    1.58
  -5  -8  -4  141.71    3.50
   5  -8   4  139.96    5.00
  -6  -8  -4  151.53    2.00
   6  -8   4  152.15    3.62
   7  -8   4  199.96    6.87
  -7  -8  -4  198.80    4.62
   8  -8   4  112.10    7.66
   8  -8   4  110.96    2.75
  -8  -8  -4  107.10    3.83
   9  -8   4    3.69    0.79
  10  -8   4  191.21    7.41
 -10  -8  -4  192.03    3.58
  11  -8   4  163.23    2.08
 -11  -8  -4  165.48    3.75
  11  -8   4  161.41    6.50
  12  -8   4    6.50    5.37
 -12  -8  -4    6.95    1.00
 -12  -8  -4    6.94    2.33
  12   8   4    6.56    1.00
 -13  -8  -4    2.69    2.58
  13  -8   4    0.66    1.37
  13  -8   4    0.18    4.83
 -13   8  -4    0.18    1.12
  13   8   4    0.48    1.33
 -14  -8  -4   23.81    2.91
  14  -8   4   20.77    5.45
 -14  -8  -4   22.06    1.25
 -14   8  -4   19.68    1.58
  14   8   4   20.86    1.79
 -15  -8  -4   11.08    2.91
 -15  -8  -4    8.86    1.25
  15  -8   4    9.96    5.58
 -15   8  -4    7.49    1.42
  16  -8   4   41.48    6.62
 -16  -8  -4   44.51    1.54
  17  -8   4    4.70    7.08
 -17   8  -4    4.72    1.79
 -18  -8  -4    2.01    1.54
  18  -8   4    2.75    7.83
 -18   8  -4    1.44    1.96
 -18  -9   4   33.87    3.54
 -18  -9   4   38.04    1.62
  18  -9  -4   41.87    7.08
 -18   9   4   36.78    2.42
 -17  -9   4    0.87    3.37
 -17  -9   4    0.03    1.33
  17  -9  -4    3.76    6.08
  16  -9  -4    2.18    6.33
 -16  -9   4    0.08    3.21
 -15  -9   4    3.07    1.25
  15  -9  -4    1.03    5.29
 -15   9   4    1.64    1.58
 -14  -9   4   51.19    1.67
  14   9  -4   52.08    2.46
 -14   9   4   51.30    2.08
 -13  -9   4    4.74    1.04
 -13  -9   4    4.74    2.54
  13  -9  -4    4.74    4.50
 -13   9   4    4.74    1.29
 -12  -9   4    7.42    1.12
  12  -9  -4    9.95    4.87
 -12  -9   4    6.64    2.42
 -12   9   4    8.26    1.25
  11  -9  -4   23.09    3.87
 -11  -9   4   25.68    2.25
 -11  -9   4   23.51    2.50
 -10  -9   4    2.47    2.46
 -10  -9   4    0.55    1.96
  10  -9  -4    4.76    4.41
  -9  -9   4    2.94    1.87
  -9  -9   4    3.64    2.08
   9  -9  -4    3.72    3.83
   8  -9  -4    9.61    3.91
   8  -9  -4    8.92    1.37
  -8  -9   4    9.82    2.08
  -8  -9   4   10.85    1.92
  -8  -9   4   11.55    2.75
  -7  -9   4    8.34    1.79
  -7  -9   4    8.32    1.17
   7  -9  -4    8.86    1.08
  -7  -9   4    8.31    1.96
  -6  -9   4  217.25    2.83
  -6  -9   4  213.60    3.83
   6  -9  -4  215.20    5.25
   5  -9  -4   44.56    3.46
   5  -9  -4   45.02    1.79
  -5  -9   4   44.07    2.37
  -4  -9   4   84.34    4.08
   4  -9  -4   80.36    3.25
  -4  -9   4   82.05    4.21
  -4  -9   4   82.53    2.91
   3  -9  -4    9.55    1.50
  -3  -9   4   10.37    2.50
  -3  -9   4    9.04    1.92
   2  -9  -4  155.68    3.16
   2  -9  -4  159.64    4.37
  -2  -9   4  158.22    4.25
  -2  -9   4  159.68    3.54
   2   9  -4  157.51    4.16
  -1  -9   4   12.18    2.33
  -1  -9   4   11.74    1.58
   0  -9   4   43.58    2.21
   0  -9  -4   42.77    2.46
   0  -9   4   44.14    3.21
   0   9   4   43.76    3.12
   0   9  -4   43.60    4.04
   1  -9   4   28.30    2.04
  -1  -9  -4   28.15    2.00
   1  -9   4   26.57    2.91
   2  -9   4   35.59    2.21
  -2  -9  -4   35.25    1.92
   2   9   4   36.88    2.66
  -3  -9  -4   72.79    2.71
  -3  -9  -4   70.03    1.75
   3  -9   4   73.44    2.50
   3  -9   4   71.90    4.25
   3   9   4   69.54    2.71
  -4  -9  -4   51.22    1.00
  -4  -9  -4   51.49    2.17
   4  -9   4   51.62    3.71
   5  -9   4   81.89    5.20
  -5  -9  -4   77.51    2.96
   5  -9   4   81.05    2.66
   6  -9   4    3.55    1.33
   6  -9   4    3.55    3.33
   7  -9   4    1.43    1.37
   7  -9   4    0.53    4.04
  -7  -9  -4    1.35    1.92
   8  -9   4   16.39    3.91
  -8  -9  -4   21.57    2.25
   9  -9   4   29.37    4.96
  -9  -9  -4   26.87    3.12
   9  -9   4   28.11    1.96
  10  -9   4    0.01    4.50
 -10  -9  -4    0.13    0.92
 -10  -9  -4    1.94    2.17
  11  -9   4   50.30    1.12
  11  -9   4   47.30    5.20
  11  -9   4   50.51    1.87
 -12  -9  -4    4.62    1.12
  12  -9   4    5.13    1.58
 -12  -9  -4    4.64    2.58
  12  -9   4    4.83    5.95
  13  -9   4   25.77    5.95
 -13  -9  -4   21.24    1.17
 -13  -9  -4   23.68    2.83
 -14  -9  -4    0.88    1.21
 -14  -9  -4    2.81    2.87
 -15  -9  -4    4.42    1.25
 -15  -9  -4    4.73    3.08
  15  -9   4    5.73    6.20
 -16  -9  -4    1.57    1.37
 -16  -9  -4    0.72    3.04
  17  -9   4    0.26    7.33
 -17  -9  -4    1.13    1.46
  18  -9   4    0.14    8.20
 -18  -9  -4    0.14    3.08
  18 -10  -4   13.64    6.75
 -18 -10   4   15.75    1.83
 -17 -10   4    2.80    1.58
 -17 -10   4    0.23    3.54
 -16 -10   4    1.88    1.33
  16 -10  -4    2.20    5.87
 -15 -10   4    3.28    1.46
 -15 -10   4    3.86    3.21
  14 -10  -4   16.04    5.45
 -14 -10   4   17.14    1.37
 -13 -10   4    3.67    2.91
  13 -10  -4    6.30    5.16
 -12 -10   4   42.79    1.42
  11 -10  -4    2.66    4.08
  10 -10  -4  100.41    1.71
 -10 -10   4  101.25    3.33
   9 -10  -4   17.66    1.33
   9 -10  -4   16.71    4.33
   8 -10  -4    6.46    1.17
   8 -10  -4    5.93    3.50
  -7 -10   4   23.00    1.29
   7 -10  -4   21.59    1.33
   7 -10  -4   20.52    4.08
   6 -10  -4   49.36    1.75
   6 -10  -4   48.90    3.83
  -6 -10   4   46.60    1.33
  -6 -10   4   48.90    2.37
   5 -10  -4    9.75    1.29
  -5 -10   4    9.37    2.08
  -5 -10   4    9.37    1.92
  -5 -10   4    9.37    0.87
  -4 -10   4  476.43    7.12
  -4 -10   4  481.37    7.20
  -4 -10   4  478.18    6.25
   4 -10  -4  479.32    8.24
   3  10  -4  119.52    3.33
  -2 -10   4   21.94    3.21
  -2 -10   4   20.80    2.46
   2 -10  -4   22.89    2.17
   2  10  -4   25.37    3.25
  -1 -10   4    6.27    2.58
   1 -10  -4    7.74    1.54
  -1 -10   4    8.88    1.75
   1  10  -4    9.09    3.08
   0 -10  -4   13.69    2.04
   0 -10   4   13.52    2.50
   0 -10   4   13.38    1.79
   0  10   4   13.36    2.91
   1 -10   4   46.82    4.08
  -1 -10  -4   47.94    2.83
   1 -10   4   47.92    2.62
   1  10   4   48.30    3.41
  -2 -10  -4   48.69    2.83
  -2 -10  -4   51.07    2.91
   2 -10   4   50.75    4.91
   3 -10   4    0.31    1.58
  -3 -10  -4    0.06    1.00
   3 -10   4    0.18    3.25
  -4 -10  -4   54.13    2.46
   4 -10   4   53.94    2.17
  -4 -10  -4   53.37    1.25
   4 -10   4   51.58    4.00
   5 -10   4   14.49    1.71
  -5 -10  -4   14.57    2.29
   6 -10   4   22.02    1.96
  -6 -10  -4   21.80    2.33
   7 -10   4   61.99    4.96
   7 -10   4   59.71    2.25
   8 -10   4    1.78    1.58
  -8 -10  -4    3.24    2.25
   9 -10   4   14.83    4.91
  -9 -10  -4   15.02    2.33
  10 -10   4    7.39    1.79
 -10 -10  -4    9.08    2.79
 -11 -10  -4   14.03    1.12
 -11 -10  -4   15.21    2.58
  11 -10   4   12.39    4.71
  11 -10   4   15.69    1.79
 -12 -10  -4   49.90    3.21
  12 -10   4   50.01    5.50
  12 -10   4   50.22    2.04
 -13 -10  -4    2.73    2.96
 -13 -10  -4    2.98    1.25
  13 -10   4    2.90    5.91
 -14 -10  -4    5.09    3.04
  14 -10   4    5.03    6.25
 -14 -10  -4    3.94    1.25
  15 -10   4    4.25    6.12
 -15 -10  -4    2.25    3.21
 -16 -10  -4   53.15    1.87
 -16 -10  -4   57.03    3.79
 -17 -10  -4    6.96    3.37
 -17 -10  -4    6.96    1.50
  18 -10   4    4.02    8.45
 -17 -11   4    1.81    1.62
  17 -11  -4    4.38    7.54
  16 -11  -4    2.83    6.12
 -16 -11   4    4.18    1.46
 -16 -11   4    2.81    3.41
  15 -11  -4   10.89    6.79
 -15 -11   4    8.95    1.46
 -14 -11   4    7.00    1.37
 -14 -11   4    5.63    3.16
 -13 -11   4    5.32    3.04
 -13 -11   4    5.70    1.21
 -12 -11   4   28.42    3.16
  12 -11  -4   30.04    5.25
  11 -11  -4    7.71    0.87
  11 -11  -4    6.99    5.00
 -11 -11   4   10.89    2.96
  10 -11  -4   15.12    1.21
  10 -11  -4   16.61    4.58
   9 -11  -4    0.17    4.62
   9 -11  -4    0.17    1.29
   8 -11  -4   12.22    1.37
  -7 -11   4   56.05    1.37
   7 -11  -4   52.21    3.91
   7 -11  -4   54.09    1.75
  -7 -11   4   52.99    2.62
  -6 -11   4   17.71    1.25
  -6 -11   4   19.18    2.37
  -6 -11   4   16.59    2.87
   6 -11  -4   18.25    1.67
   5 -11  -4   19.31    2.04
  -5 -11   4   20.41    3.58
  -5 -11   4   21.10    3.12
  -5 -11   4   18.20    1.62
  -4 -11   4    3.21    1.12
   4 -11  -4    5.40    3.21
   4 -11  -4    4.41    1.50
  -4 -11   4    3.21    2.12
   3 -11  -4  297.88    6.79
  -3 -11   4  295.19    5.62
  -3 -11   4  295.99    6.00
   3  11  -4  291.08    5.62
  -2 -11   4   59.05    3.33
   2  11  -4   62.73    4.37
  -1 -11   4  104.36    3.96
   1 -11  -4  103.78    2.46
   0 -11   4  104.40    4.87
   0 -11   4   99.66    3.25
   0 -11  -4  103.89    3.96
  -1 -11  -4   98.91    3.54
  -1 -11  -4  103.17    4.08
   1 -11   4  105.25    5.58
  -2 -11  -4   60.22    3.16
  -2 -11  -4   58.87    3.08
   2 -11   4   60.96    3.29
   3 -11   4    4.59    1.67
   3 -11   4    5.90    3.71
  -3 -11  -4    5.07    2.00
  -3 -11  -4    4.72    1.21
   4 -11   4  115.46    3.04
  -4 -11  -4  116.29    2.00
  -4 -11  -4  114.96    3.21
   4 -11   4  120.82    5.29
   5 -11   4  172.99    2.96
  -6 -11  -4   35.66    2.83
   6 -11   4   37.34    2.37
   6 -11   4   37.57    5.20
   7 -11   4   11.33    4.21
  -7 -11  -4   12.58    2.25
  -8 -11  -4   15.16    2.75
   8 -11   4   17.75    2.08
   8 -11   4   18.19    5.12
  -9 -11  -4   13.78    2.66
   9 -11   4   14.14    1.75
  10 -11   4   48.69    2.17
 -10 -11  -4   51.94    3.08
 -11 -11  -4   18.20    1.21
 -11 -11  -4   17.50    2.75
 -12 -11  -4    2.21    1.21
 -12 -11  -4    2.21    2.83
 -13 -11  -4   12.04    3.21
  13 -11   4    7.57    5.62
 -13 -11  -4   11.45    1.42
  13 -11   4   11.58    2.00
  14 -11   4    0.98    6.25
 -14 -11  -4    0.98    1.33
 -14 -11  -4    2.56    3.25
 -15 -11  -4    2.78    1.42
 -15 -11  -4    2.99    3.58
 -16 -11  -4    0.97    1.50
 -16 -11  -4    0.95    3.62
  16 -11   4    0.04    7.00
 -17 -11  -4    0.80    1.67
 -17 -12   4    5.19    4.04
 -16 -12   4    7.50    3.87
  16 -12  -4    9.38    6.41
 -16 -12   4    5.88    1.54
 -15 -12   4    0.54    1.46
 -15 -12   4    0.54    3.66
  15 -12  -4    0.54    6.12
 -14 -12   4    6.45    3.75
  14 -12  -4   10.98    6.79
 -13 -12   4    7.22    3.33
 -13 -12   4    9.06    1.37
  13 -12  -4   11.46    5.91
 -12 -12   4    3.65    3.21
  12 -12  -4    3.25    6.08
 -11 -12   4    0.88    3.00
  11 -12  -4    0.88    4.12
  11 -12  -4    0.88    1.17
  10 -12  -4   11.16    1.46
  10 -12  -4   11.88    5.08
  -9 -12   4    3.99    2.96
   9 -12  -4    2.75    1.54
   8 -12  -4   37.39    1.75
  -8 -12   4   36.06    3.00
  -6 -12   4  146.79    2.46
  -6 -12   4  146.58    4.16
   6 -12  -4  145.72    3.04
  -5 -12   4    1.11    2.62
   5 -12  -4    0.79    3.96
   5 -12  -4    1.19    1.67
  -4 -12   4   12.61    2.79
   4 -12  -4   12.38    1.67
   4 -12  -4   14.91    3.66
  -3 -12   4  101.10    4.50
   3 -12  -4   97.50    3.12
   3  12  -4  100.24    3.96
  -2 -12   4   15.55    2.62
   2 -12  -4   14.39    3.33
  -2 -12   4   14.05    3.41
   1 -12  -4    6.71    3.16
   1 -12  -4    6.31    1.83
  -1 -12   4    6.03    2.25
  -1 -12   4    6.08    3.46
   0 -12   4   98.55    3.79
   0 -12   4  101.35    5.50
  -1 -12  -4   36.76    3.16
  -1 -12  -4   37.92    2.71
   1 -12   4   38.80    4.33
   2 -12   4    9.01    2.00
   2 -12   4    5.20    3.79
  -2 -12  -4    8.29    2.04
   4 -12   4    5.99    1.67
  -4 -12  -4    3.67    2.04
  -4 -12  -4    5.36    0.96
  -5 -12  -4   42.41    2.37
   5 -12   4   44.85    2.04
   6 -12   4    3.86    4.29
  -6 -12  -4    3.84    2.21
   7 -12   4   10.59    1.87
  -7 -12  -4   10.21    2.54
   7 -12   4   13.03    4.83
   8 -12   4   17.77    2.08
   8 -12   4   19.67    5.54
   9 -12   4   38.79    2.00
  -9 -12  -4   39.21    2.96
   9 -12   4   39.09    5.45
  10 -12   4   42.18    2.04
 -10 -12  -4   40.34    2.91
 -11 -12  -4   15.20    3.12
  11 -12   4   14.55    2.12
  11 -12   4   14.51    6.04
 -12 -12  -4    2.68    3.16
  12 -12   4    1.80    5.70
 -12 -12  -4    0.91    1.25
 -13 -12  -4   10.59    1.37
  13 -12   4   11.18    5.16
  13 -12   4    9.01    2.08
 -14 -12  -4    2.19    1.37
  14 -12   4    2.19    6.91
 -14 -12  -4    3.69    3.46
 -16 -12  -4    1.03    3.66
 -16 -12  -4    0.75    1.58
 -17 -12  -4    6.94    1.71
  17 -12   4   11.00    7.62
  16 -13  -4    3.72    7.25
 -16 -13   4    3.19    4.33
 -16 -13   4    3.61    1.75
 -15 -13   4    2.11    3.96
 -14 -13   4    7.00    1.58
  14 -13  -4    9.82    6.25
 -14 -13   4    9.69    3.91
  12 -13  -4   21.59    6.04
 -12 -13   4   27.64    3.87
 -11 -13   4    1.64    3.41
  11 -13  -4    0.16    1.46
 -10 -13   4   53.20    3.41
   9 -13  -4    7.13    1.71
   9 -13  -4    6.75    4.46
   8 -13  -4   14.44    1.71
  -8 -13   4   13.05    2.83
   7 -13  -4   24.36    2.04
  -7 -13   4   22.06    3.16
  -6 -13   4  151.64    2.62
  -5 -13   4    3.54    2.75
   5 -13  -4    5.69    4.00
  -5 -13   4    4.64    3.08
  -4 -13   4    1.68    3.37
   4 -13  -4    1.46    3.83
  -4 -13   4    1.44    2.29
  -3 -13   4    3.69    3.66
   3 -13  -4    5.71    3.66
   3 -13  -4    4.91    1.83
  -3 -13   4    3.03    2.58
   3  13  -4    2.84    5.20
   2 -13  -4   18.10    3.75
  -2 -13   4   17.32    3.79
   2 -13  -4   14.90    1.87
  -1 -13   4    7.13    4.08
   1 -13  -4    6.44    3.46
  -1 -13   4    4.48    2.42
   1 -13  -4    4.24    1.96
   0 -13   4    3.58    2.75
   0 -13  -4    1.22    2.46
   0 -13   4    2.87    3.87
  -1 -13  -4    8.51    2.08
  -1 -13  -4    9.50    2.75
   1 -13   4    8.44    4.21
   2 -13   4   21.84    2.33
  -2 -13  -4   19.86    2.12
  -2 -13  -4   19.51    2.29
   3 -13   4    2.58    2.25
  -3 -13  -4    2.24    2.29
  -3 -13  -4    1.29    1.71
   3 -13   4    3.33    4.37
   4 -13   4   14.83    2.54
  -4 -13  -4   15.57    1.54
  -5 -13  -4    8.65    2.21
   5 -13   4    8.65    1.83
   6 -13   4    5.16    5.08
   6 -13   4    6.13    1.92
   7 -13   4    0.14    1.87
  -8 -13  -4   21.05    2.71
   8 -13   4   23.68    2.04
   8 -13   4   26.00    5.45
  -9 -13  -4    0.03    2.58
   9 -13   4    0.03    5.12
  10 -13   4    6.12    5.66
  10 -13   4    3.36    2.12
  11 -13   4    3.81    2.08
  11 -13   4    6.30    5.29
 -11 -13  -4    4.25    3.12
 -12 -13  -4    3.14    3.21
  12 -13   4    1.90    2.12
 -12 -13  -4    1.90    1.25
  12 -13   4    1.90    5.87
 -13 -13  -4    9.36    3.41
  13 -13   4    8.90    2.75
  13 -13   4    8.90    6.70
 -13 -13  -4    9.65    1.42
 -14 -13  -4   37.01    1.92
  14 -13   4   33.73    7.04
 -14 -13  -4   40.45    4.04
  15 -13   4    5.28    7.08
 -15 -13  -4    2.73    3.83
  16 -13   4    2.91    7.91
 -16 -13  -4    1.22    1.58
 -16 -13  -4    1.28    4.12
 -16 -14   4    0.03    2.12
 -16 -14   4    0.38    4.83
  16 -14  -4    2.47    8.12
 -15 -14   4    6.42    4.16
 -15 -14   4    9.11    1.75
 -14 -14   4    1.29    1.54
 -14 -14   4    1.36    3.75
 -13 -14   4   24.19    3.87
  13 -14  -4   28.37    6.45
 -11 -14   4    0.52    3.16
  10 -14  -4   12.33    1.92
  10 -14  -4   14.50    5.83
   9 -14  -4    0.02    5.12
  -9 -14   4    0.42    3.29
   9 -14  -4    0.18    1.75
   8 -14  -4   21.29    5.12
  -8 -14   4   21.77    3.37
  -7 -14   4    9.30    3.25
   7 -14  -4    8.73    4.50
   6 -14  -4   21.19    2.04
  -6 -14   4   24.59    3.29
   6 -14  -4   24.50    4.58
  -6 -14   4   22.42    1.29
   5 -14  -4    2.28    4.58
  -5 -14   4    3.92    3.54
  -5 -14   4    5.59    2.79
   4 -14  -4   26.69    2.46
  -4 -14   4   30.70    4.21
   4 -14  -4   24.19    4.87
  -4 -14   4   28.67    3.41
   3 -14  -4    6.85    2.21
  -3 -14   4    5.31    4.08
   3 -14  -4    5.31    4.54
  -3 -14   4    5.31    2.58
  -2 -14   4    8.55    2.62
   2 -14  -4    5.49    3.83
  -1 -14   4  253.48    5.54
  -1 -14   4  256.39    7.20
   1 -14  -4  259.61    7.08
   0 -14  -4    1.54    2.37
   0 -14  -4    0.40    3.33
   0 -14   4    0.40    4.33
   1 -14   4  124.89    2.75
   1 -14   4  123.87    4.79
  -1 -14  -4  123.33    3.46
   2 -14   4    5.71    4.58
  -2 -14  -4    3.90    2.50
  -2 -14  -4    4.30    2.46
   3 -14   4   71.46    7.50
  -3 -14  -4   71.84    3.21
   4 -14   4    3.71    4.91
   4 -14   4    0.84    2.58
  -4 -14  -4    0.84    1.33
  -5 -14  -4   53.21    3.83
   5 -14   4   60.19    7.00
   6 -14   4   13.17    2.33
  -6 -14  -4   13.84    2.54
   6 -14   4   13.17    4.91
   7 -14   4    1.78    5.08
   7 -14   4    2.73    2.46
   8 -14   4    2.20    2.25
  -8 -14  -4    3.72    3.16
   8 -14   4    5.19    5.62
   9 -14   4   40.81    6.41
   9 -14   4   38.33    2.54
  10 -14   4    6.19    2.21
 -10 -14  -4    4.49    3.12
  11 -14   4   20.08    2.37
 -11 -14  -4   19.17    3.37
  11 -14   4   23.01    6.25
 -12 -14  -4    0.06    1.42
  12 -14   4    1.47    2.50
  13 -14   4   12.00    6.75
 -13 -14  -4   13.03    3.66
 -14 -14  -4    4.95    1.54
 -14 -14  -4    5.92    3.79
  14 -14   4    9.41    7.50
 -15 -14  -4    4.75    1.62
 -15 -14  -4    4.75    4.12
  15 -14   4    4.75    7.12
 -16 -14  -4    1.21    4.54
 -15 -15   4   11.13    1.83
 -15 -15   4   12.44    4.87
 -14 -15   4    0.28    1.67
  14 -15  -4    1.01    7.08
 -14 -15   4    0.66    4.29
  13 -15  -4    4.09    6.95
 -13 -15   4    2.99    4.04
  11 -15  -4    2.25    5.95
 -10 -15   4   17.52    4.04
  10 -15  -4   13.94    2.04
  10 -15  -4   12.12    6.25
  -9 -15   4    1.72    3.66
   9 -15  -4    5.66    5.87
   9 -15  -4    4.06    2.08
   8 -15  -4    1.91    2.04
  -8 -15   4    3.80    3.71
   7 -15  -4   56.56    6.70
   7 -15  -4   52.26    3.00
  -7 -15   4   48.15    4.08
   6 -15  -4   35.69    2.29
  -6 -15   4   34.89    2.96
   6 -15  -4   40.01    5.45
  -5 -15   4   30.45    1.71
   5 -15  -4   29.81    5.29
   4 -15  -4    0.63    2.21
   4 -15  -4    0.63    4.96
  -4 -15   4    3.14    3.04
  -4 -15   4    0.63    4.50
  -3 -15   4   64.37    3.96
   3 -15  -4   65.07    3.16
  -2 -15   4  130.36    3.54
   2 -15  -4  133.90    3.37
  -1 -15   4   54.46    5.62
  -1 -15   4   50.43    3.41
   1 -15  -4   51.78    5.00
   0 -15   4    6.36    5.16
   0 -15  -4    3.53    4.08
   0 -15   4    3.81    2.71
  -1 -15  -4   38.93    2.91
   1 -15   4   41.14    3.37
   2 -15   4   12.56    2.54
  -2 -15  -4   13.13    2.91
   2 -15   4   12.99    5.33
  -2 -15  -4   13.53    2.75
  -3 -15  -4    4.24    2.71
   4 -15   4   20.24    2.54
   5 -15   4   10.91    5.29
  -5 -15  -4   11.10    2.87
   5 -15   4   12.23    2.37
  -6 -15  -4    4.96    3.08
   6 -15   4    5.99    5.95
   7 -15   4   10.33    5.95
   7 -15   4    9.21    2.66
  -7 -15  -4    7.97    3.04
   8 -15   4   15.49    3.12
  -8 -15  -4   16.77    3.46
  -9 -15  -4    1.55    3.04
   9 -15   4    3.48    5.70
  10 -15   4    0.10    2.62
  11 -15   4   14.02    6.54
 -11 -15  -4   16.72    3.58
  11 -15   4   15.14    2.62
 -12 -15  -4    8.09    3.75
  12 -15   4    5.26    6.45
  12 -15   4    6.48    2.62
 -13 -15  -4   18.56    4.04
  13 -15   4   18.98    7.20
 -14 -15  -4    4.20    1.62
 -14 -15  -4    4.20    4.16
 -15 -15  -4    6.60    1.83
  15 -15   4    4.66    7.45
 -15 -15  -4    7.44    4.54
  14 -16  -4    0.79    6.75
 -14 -16   4    0.79    4.54
  13 -16  -4    0.24    6.45
 -13 -16   4    2.24    4.54
 -12 -16   4    0.11    4.21
  12 -16  -4    0.68    7.25
  11 -16  -4    3.43    2.25
  11 -16  -4    3.12    6.04
 -11 -16   4    3.12    4.12
 -10 -16   4    1.07    3.91
  -9 -16   4    1.98    3.71
   9 -16  -4    5.24    2.42
   9 -16  -4    5.14    6.16
   8 -16  -4    0.51    2.75
   7 -16  -4   19.76    2.50
   7 -16  -4   20.23    6.54
  -7 -16   4   20.10    3.41
  -6 -16   4    3.52    3.58
   6 -16  -4    1.60    6.25
   6 -16  -4    1.60    2.33
   5 -16  -4    7.36    2.54
  -5 -16   4    6.31    3.37
   5 -16  -4    8.48    6.00
   4 -16  -4   45.89    3.00
   4 -16  -4   47.31    6.25
  -4 -16   4   47.16    5.37
   3 -16  -4   94.81    6.45
   3 -16  -4   88.89    3.33
  -3 -16   4   90.76    4.25
  -2 -16   4    0.33    5.62
  -2 -16   4    0.33    2.91
   2 -16  -4    0.39    2.50
  -1 -16   4   56.78    6.62
   1 -16  -4   53.54    3.12
   0 -16  -4   41.33    3.00
   0 -16   4   38.68    5.75
   0 -16  -4   39.90    5.08
  -1 -16  -4   96.78    3.58
   1 -16   4   93.79    3.58
   2 -16   4    4.09    5.83
   2 -16   4    4.57    2.54
  -3 -16  -4   12.31    2.87
   4 -16   4    5.46    5.95
  -4 -16  -4    6.28    3.25
   5 -16   4   24.08    2.66
   5 -16   4   25.98    6.04
  -5 -16  -4   25.33    3.25
   6 -16   4    4.20    5.75
  -6 -16  -4    4.20    2.83
   6 -16   4    4.30    2.54
  -7 -16  -4   11.79    3.08
   7 -16   4   11.79    6.50
   8 -16   4   11.07    2.66
   8 -16   4   10.81    6.20
  -9 -16  -4    7.11    3.25
   9 -16   4    5.55    2.75
   9 -16   4    5.87    6.50
  10 -16   4    1.18    2.75
  10 -16   4    1.18    6.33
 -11 -16  -4   11.00    3.87
  11 -16   4    8.01    7.41
 -12 -16  -4    6.94    4.00
  13 -16   4    6.00    7.74
 -13 -16  -4    2.01    1.62
 -14 -16  -4    1.41    1.79
 -14 -16  -4    2.78    4.79
 -14 -17   4    0.22    4.96
  13 -17  -4    6.31    7.87
 -12 -17   4    5.33    4.58
  12 -17  -4    6.26    7.33
 -11 -17   4    8.13    4.71
  11 -17  -4    5.77    2.83
  11 -17  -4    3.76    7.62
 -10 -17   4    0.31    4.16
  10 -17  -4    0.31    2.83
  10 -17  -4    5.43    7.12
  -9 -17   4   22.86    4.04
   9 -17  -4   23.51    2.75
   9 -17  -4   26.40    7.00
   8 -17  -4    1.20    2.66
   8 -17  -4    0.57    6.62
   7 -17  -4    3.01    2.54
  -7 -17   4    2.69    3.83
   7 -17  -4    4.35    6.45
  -6 -17   4    3.13    3.66
   6 -17  -4    0.80    6.79
   5 -17  -4   12.35    2.79
  -5 -17   4   13.02    3.41
   5 -17  -4   13.86    6.29
  -4 -17   4    2.46    3.25
   4 -17  -4    1.18    2.66
   4 -17  -4    1.22    6.41
  -3 -17   4   29.81    6.00
   3 -17  -4   26.38    3.08
   3 -17  -4   28.86    6.75
  -3 -17   4   26.48    3.37
  -2 -17   4    8.30    6.20
  -2 -17   4   12.47    3.62
   2 -17  -4   13.51    2.96
   2 -17  -4    9.08    5.87
  -1 -17   4   12.02    6.37
   1 -17  -4   17.20    6.16
   1 -17  -4   17.60    3.25
  -1 -17   4   14.19    3.46
   0 -17  -4    2.87    3.12
   0 -17   4    4.68    7.04
   1 -17   4    6.63    3.08
  -1 -17  -4    6.73    3.41
  -2 -17  -4   10.83    3.75
  -2 -17  -4   10.16    3.12
   2 -17   4   10.16    2.87
  -3 -17  -4   30.49    3.33
   3 -17   4   26.69    6.62
   3 -17   4   30.17    3.12
   4 -17   4    3.04    2.79
  -4 -17  -4    3.39    2.00
   4 -17   4    4.78    6.66
   5 -17   4   30.68    7.00
  -5 -17  -4   30.51    3.50
   5 -17   4   33.56    2.96
   6 -17   4   16.82    6.79
   6 -17   4   12.16    3.00
  -7 -17  -4    8.51    3.21
   7 -17   4    5.73    2.83
   7 -17   4    5.73    6.50
  -8 -17  -4   35.09    4.08
   8 -17   4   33.57    3.33
   8 -17   4   33.30    7.25
  -9 -17  -4    6.12    3.87
   9 -17   4    5.14    6.58
  10 -17   4   33.85    3.21
  10 -17   4   27.23    7.70
 -10 -17  -4   34.99    4.25
  11 -17   4   28.95    3.16
 -11 -17  -4   25.50    4.08
  12 -17   4    1.85    5.16
  12 -17   4    2.04    8.49
 -13 -17  -4   23.93    1.87
  13 -17   4   27.93    7.91
 -13 -17  -4   22.32    4.75
  13 -18  -4    9.57   14.57
  12 -18  -4    6.32    8.41
  11 -18  -4    0.03    7.83
 -11 -18   4    0.03    4.54
 -10 -18   4    1.47    4.46
  10 -18  -4    1.47    8.24
   9 -18  -4   20.07    3.00
  -9 -18   4   19.37    4.46
  -8 -18   4   27.57    4.79
   8 -18  -4   31.24    3.29
   8 -18  -4   36.68    8.16
   7 -18  -4    9.02    7.45
   7 -18  -4   11.48    2.83
   6 -18  -4    0.95    3.04
   6 -18  -4    3.25    7.54
   5 -18  -4    0.12    2.91
   5 -18  -4    5.93    7.87
  -4 -18   4    6.84    6.25
  -4 -18   4    3.47    3.58
  -3 -18   4    2.16    3.58
  -3 -18   4    2.86    6.66
   3 -18  -4    2.60    3.00
   2 -18  -4   27.94    3.37
  -2 -18   4   26.20    7.04
   2 -18  -4   27.97    7.20
  -2 -18   4   26.03    3.62
   1 -18  -4    3.14    6.58
  -1 -18   4    3.14    7.45
   1 -18  -4    4.58    3.04
   0 -18   4    9.75    3.66
   1 -18   4    5.88    3.16
  -1 -18  -4    6.58    5.20
  -1 -18  -4    5.80    2.96
   1 -18   4    8.07    7.25
   2 -18   4   10.78    7.74
  -2 -18  -4    6.59    4.37
   2 -18   4    3.70    3.29
   3 -18   4   25.94    7.45
  -3 -18  -4   23.76    3.25
   4 -18   4    2.34    3.41
  -4 -18  -4    0.83    2.29
   5 -18   4   11.59    3.46
   5 -18   4   11.37    7.25
   6 -18   4    0.18    7.29
   6 -18   4    0.18    3.04
  -6 -18  -4    0.18    3.62
  -7 -18  -4   26.44    4.16
   7 -18   4   26.07    3.33
   7 -18   4   32.45    7.87
   8 -18   4    7.98    3.08
  -8 -18  -4   10.50    4.16
   8 -18   4    5.11    6.83
   9 -18   4   11.98    3.33
   9 -18   4   10.57    7.04
  -9 -18  -4   11.85    4.16
  10 -18   4    5.29    3.41
 -10 -18  -4    3.22    3.87
  10 -18   4    3.22    6.50
  11 -18   4    5.95    3.54
 -11 -18  -4    7.09    4.46
  11 -18   4    6.08    8.29
  12 -18   4   18.30    8.66
  11 -19  -4    8.19    8.04
 -11 -19   4    4.48    4.96
 -10 -19   4   19.82    5.25
  10 -19  -4   21.36    3.50
  10 -19  -4   23.47    8.49
   9 -19  -4   18.50    3.41
  -9 -19   4   17.01    4.79
   9 -19  -4   15.24    8.58
  -8 -19   4    3.77    4.87
   8 -19  -4    2.99    3.21
  -7 -19   4    1.30    4.58
   7 -19  -4    1.30    3.16
   7 -19  -4    1.30    8.16
   6 -19  -4   16.67    3.25
  -6 -19   4   12.12    4.66
   6 -19  -4   15.03    8.41
   5 -19  -4    6.18    3.41
  -5 -19   4   11.59    3.91
  -4 -19   4   11.71    4.16
   4 -19  -4   11.99    3.41
  -4 -19   4    5.73    7.12
  -3 -19   4    0.19    3.75
   3 -19  -4    0.17    3.08
  -2 -19   4    4.69    3.71
   2 -19  -4    6.81    7.87
  -2 -19   4    4.58    7.54
  -1 -19   4    3.37    3.21
  -1 -19   4    3.37    8.70
   1 -19  -4    3.37    3.08
   0 -19  -4    7.90    8.24
   1 -19   4    8.36    3.41
  -1 -19  -4    6.59    5.50
   2 -19   4   10.00    8.37
  -2 -19  -4   10.52    3.79
   2 -19   4    9.68    3.16
  -2 -19  -4    9.22    5.04
   3 -19   4    2.86    3.08
  -3 -19  -4    3.00    3.71
   4 -19   4    8.33    3.25
   4 -19   4    5.66    7.99
   5 -19   4    0.47    3.21
   5 -19   4    0.43    7.70
  -5 -19  -4    0.90    3.66
  -6 -19  -4    4.21    4.08
   6 -19   4    5.95    8.12
   6 -19   4    5.05    3.37
   7 -19   4   12.77    3.41
  -7 -19  -4   15.09    4.16
   7 -19   4   11.67    7.87
  -8 -19  -4   12.17    4.54
   8 -19   4    9.03    3.54
   9 -19   4    6.12    3.54
   9 -19   4    6.12    7.58
 -10 -19  -4    3.95    4.54
  10 -19   4    3.61    9.16
  11 -19   4    5.91    3.83
  11 -19   4   10.70    8.87
  10 -20  -4    1.66    8.95
  10 -20  -4    4.31    4.04
 -10 -20   4    1.58    5.04
   9 -20  -4    4.49    3.58
   9 -20  -4    4.20    8.54
  -9 -20   4    8.30    5.50
  -8 -20   4   10.04    5.33
   8 -20  -4    9.97    8.79
   8 -20  -4    7.74    3.62
   7 -20  -4   14.56    8.54
   7 -20  -4   13.25    3.66
   6 -20  -4    2.42    8.95
  -6 -20   4    1.22    4.29
   6 -20  -4    2.35    3.33
  -5 -20   4   10.83    4.41
   5 -20  -4   14.92    9.08
   5 -20  -4   11.52    3.41
   4 -20  -4    3.13    8.74
  -4 -20   4    3.13    4.41
   4 -20  -4    4.79    3.33
   3 -20  -4    4.44    8.62
  -3 -20   4   11.16    8.62
  -3 -20   4    5.05    4.21
  -2 -20   4    4.69    3.87
   2 -20  -4    4.64    8.54
   2 -20  -4    5.61    3.46
  -1 -20   4    0.03    3.79
   0 -20  -4    0.40    7.20
   0 -20  -4    0.40    3.46
   0 -20   4    0.40    9.37
  -1 -20  -4   18.00    4.04
  -1 -20  -4   22.19    6.91
   1 -20   4   15.98    3.66
  -2 -20  -4    1.95    4.00
   2 -20   4    0.77    3.46
  -3 -20  -4    3.31    3.87
   3 -20   4    3.46    3.46
   4 -20   4    4.64    3.46
  -4 -20  -4    2.28    3.91
   4 -20   4    2.74    9.20
   5 -20   4   10.24    3.66
  -5 -20  -4    7.74    4.29
   6 -20   4    7.42    9.24
   6 -20   4    7.00    3.58
  -6 -20  -4    9.44    4.58
   7 -20   4    9.20    9.24
  -7 -20  -4    5.81    4.25
  -8 -20  -4    0.54    4.54
   9 -20   4    1.26    3.83
   9 -20   4    0.23    9.08
  10 -20   4   17.08    3.96
  10 -20   4   19.84    9.87
 -10 -20  -4   16.68    4.87
   9 -21  -4    2.00    9.91
   8 -21  -4   12.15   10.78
  -8 -21   4    4.10    5.25
  -7 -21   4    4.16    4.87
   7 -21  -4    3.71   10.08
   6 -21  -4    3.58    3.75
   6 -21  -4    9.86   10.24
  -6 -21   4    6.17    5.20
  -5 -21   4   34.82    5.00
   5 -21  -4   31.13    3.83
   4 -21  -4    0.89    9.66
   3 -21  -4    1.82    3.75
   3 -21  -4    1.61    9.95
   2 -21  -4    5.28    9.41
   2 -21  -4    0.29    3.91
   1 -21  -4    6.75    8.87
   1 -21  -4    9.81    4.12
   0 -21  -4   25.96    8.24
   0 -21   4   23.17   10.87
   0 -21  -4   24.54    4.21
  -1 -21  -4    9.40    3.91
   1 -21   4    6.79    4.16
   1 -21   4    6.56   10.58
   2 -21   4   22.78    4.21
  -2 -21  -4   25.52    4.41
   3 -21   4    2.97    3.79
   3 -21   4    2.19   10.58
  -3 -21  -4    5.46    4.16
  -4 -21  -4    8.81    4.08
   4 -21   4    8.81    3.75
  -5 -21  -4   13.40    4.91
   5 -21   4   16.92    3.96
   6 -21   4    1.22    3.75
  -6 -21  -4    1.22    4.54
   7 -21   4    0.84    3.96
   7 -21   4    0.48   11.08
  -7 -21  -4    0.48    5.00
  -8 -21  -4   11.11    5.16
   8 -21   4   12.88   10.74
  -9 -21  -4    8.25    6.87
   9 -21   4    8.25    9.70
  -7 -22   4   12.43    9.45
   7 -22  -4   12.98   12.33
   5 -22  -4    0.64   11.20
   5 -22  -4    4.35    4.21
  -4 -22   4   20.21    4.66
   4 -22  -4   17.94    4.00
   4 -22  -4   16.48   10.91
   3 -22  -4    2.63   10.70
  -3 -22   4    2.63    4.62
   3 -22  -4    7.69    4.25
   2 -22  -4   23.66   11.24
   2 -22  -4   16.79    4.00
  -1 -22   4    3.52    4.62
   1 -22  -4    9.04    9.70
   1 -22  -4    5.04    4.21
   0 -22  -4    4.14    4.12
   0 -22   4    5.76    4.33
   2 -22   4   11.93   11.70
   3 -22   4    2.45    4.16
  -3 -22  -4    0.37    4.75
   3 -22   4    1.91   12.24
  -4 -22  -4    8.20    5.12
   4 -22   4    6.71   11.78
   5 -22   4    0.87    3.96
  -5 -22  -4    0.87    4.58
   5 -22   4    0.87   11.83
  -6 -22  -4   12.32    5.20
   7 -22   4    1.91    4.29
  -7 -22  -4    1.89    6.16
   7 -22   4    0.06   12.12
   3 -23  -4   15.31    4.54
  -3 -23   4   13.65    5.08
  -2 -23   4    4.14    4.75
   1 -23  -4    0.14   10.66
   1 -23  -4    0.14    4.41
  -1 -23   4    0.16    4.62
   0 -23   4   12.49   13.03
   0 -23   4    8.69    4.75
   1 -23   4    7.97    4.62
  -2 -23  -4    7.27    4.83
   2 -23   4    1.83    4.37
   3 -23   4    4.24    4.25
   4 -23   4   13.02   13.57
  19   0  -5    7.36    5.41
 -17   0   5   64.62    2.21
  17   0  -5   68.35    5.91
  15   0  -5   11.59    3.91
 -15   0   5   11.82    1.21
 -13   0   5   53.30    1.58
 -11   0   5   42.23    1.29
  11   0  -5   44.70    3.83
  -9   0   5    3.52    0.71
   9   0  -5    4.02    2.46
  -5   0   5  334.31    6.70
  -3   0   5 1217.95   23.03
   1   0  -5  240.69    5.00
  -1   0   5  236.99    4.96
   1   0   5   43.47   10.83
  -3   0  -5  381.07    6.12
  -3   0  -5  380.05    7.25
   3   0   5  377.95    6.12
   5   0   5  330.73    5.08
   5   0   5  324.57    6.33
   7   0   5   41.45    3.16
  -7   0  -5   41.14    1.25
  -9   0  -5   15.49    1.00
   9   0   5   15.27    1.46
  13   0   5  150.50    6.50
 -17   0  -5   36.79    1.92
  19   0   5    6.43    7.20
 -20  -1   5    3.02    2.00
  20  -1  -5    5.15    6.33
 -20   1   5    3.19    1.92
  20   1  -5    3.02    5.41
 -19  -1   5    2.00    1.67
  19  -1  -5    1.12    5.79
  19   1  -5    0.84    4.87
 -18  -1   5   22.98    1.87
  18  -1  -5   20.94    5.87
  18   1  -5   25.19    5.25
  17  -1  -5    2.33    5.20
 -17  -1   5    2.02    1.37
 -16  -1   5    1.57    1.21
  16  -1  -5    3.76    4.87
 -16   1   5    0.66    1.33
  15  -1  -5   12.60    4.66
 -15  -1   5   11.32    1.17
 -15   1   5   10.77    1.21
  15   1  -5   11.13    3.75
 -14  -1   5   24.18    1.29
 -14  -1   5   23.74    1.04
  14   1  -5   26.29    4.58
 -13  -1   5    0.13    0.87
 -13  -1   5    0.13    0.83
  13  -1  -5    0.13    3.66
  13   1  -5    0.13    3.29
  12  -1  -5   10.96    3.58
 -12  -1   5   12.71    0.96
 -12   1   5   11.80    0.96
  11  -1  -5    4.65    2.96
  11   1  -5    5.57    2.79
 -10  -1   5   35.99    1.50
  -9  -1   5   21.10    0.96
  -9  -1   5   20.96    0.62
   9  -1  -5   20.41    2.50
   9   1  -5   21.35    2.21
  -9   1   5   20.56    0.71
  -8  -1   5   31.23    1.29
  -7  -1   5    6.03    0.42
  -7  -1   5    6.89    0.79
   7  -1  -5    6.30    2.00
  -7   1   5    6.18    0.50
  -7   1   5    6.62    0.50
   6  -1  -5   34.20    2.12
   6  -1  -5   33.14    3.41
  -6   1   5   32.89    2.00
  -5  -1   5   51.51    2.08
  -5  -1   5   49.70    1.12
   5   1  -5   51.36    1.87
  -4  -1   5  164.89    4.21
   4  -1  -5  167.00    4.96
   4  -1  -5  165.23    4.16
  -4   1   5  162.93    4.96
   4   1  -5  165.86    4.66
  -3  -1   5  466.34   13.66
   3  -1  -5  459.74   13.28
   3   1  -5  463.89   13.57
  -3   1   5  461.03   13.82
  -2  -1   5  243.79    4.91
   2  -1  -5  247.35    5.12
   2   1  -5  249.16    4.91
  -2   1   5  246.32    5.08
  -1  -1   5  265.16    2.62
   1   1  -5  265.49    2.62
   0  -1   5   62.35    1.04
   0  -1   5   60.79    1.62
   0   1   5   62.33    0.75
  -1  -1  -5  451.06   11.20
  -1  -1  -5  457.93   10.99
   1   1   5  456.98   11.20
   1   1   5  448.34   11.12
  -1   1  -5  454.47   11.62
  -2  -1  -5 1048.04   15.24
  -2  -1  -5 1048.78   15.37
   2  -1   5 1035.07   16.16
   2  -1   5 1040.10   15.28
   2   1   5 1048.51   15.86
  -2   1  -5 1040.06   15.32
   3  -1   5  560.69   16.28
  -3  -1  -5  558.83   16.36
  -3  -1  -5  564.36   16.28
   3  -1   5  554.89   17.36
  -3  -1  -5  571.47   16.91
   3   1   5  557.21   17.11
  -3   1  -5  559.51   16.32
   4  -1   5   10.09    0.67
  -4  -1  -5   10.83    0.62
   4  -1   5   10.22    0.62
  -4  -1  -5    8.83    2.08
  -4  -1  -5    9.96    0.75
  -4   1  -5    9.35    2.58
  -4   1  -5   10.77    0.71
   4   1   5   10.43    0.83
  -4   1  -5    9.80    0.71
   4   1   5   10.95    0.62
   5  -1   5    2.10    0.37
  -5  -1  -5    1.62    2.12
  -5  -1  -5    2.14    0.50
  -5  -1  -5    1.59    0.29
   5   1   5    1.61    0.54
   5   1   5    1.59    0.29
  -5   1  -5    1.64    0.42
  -5   1  -5    1.74    2.50
  -6  -1  -5  518.34   10.24
   6  -1   5  517.06   11.49
  -6   1  -5  529.64   11.87
   6   1   5  527.80   11.33
   7  -1   5   10.98    0.67
  -7  -1  -5   10.13    0.71
  -7  -1  -5    9.34    2.71
  -7  -1  -5   10.73    0.54
  -7   1  -5    9.86    0.62
   7   1   5   10.03    0.96
   8  -1   5   36.30    2.66
  -8  -1  -5   34.68    0.58
   8   1   5   36.24    2.62
  -8   1  -5   34.55    0.62
   8   1   5   34.58    1.04
   9  -1   5    7.70    0.92
   9  -1   5    6.88    2.83
  -9  -1  -5    7.55    0.62
  -9   1  -5    7.66    0.71
   9   1   5    8.19    2.71
  10  -1   5    3.90    1.12
  10  -1   5    3.21    3.16
 -10  -1  -5    3.88    0.71
 -10   1  -5    3.29    0.75
 -11  -1  -5   67.24    2.04
 -11   1  -5   69.89    1.92
  11   1   5   68.35    4.66
  12  -1   5    2.55    1.79
 -12  -1  -5    2.40    1.00
  12  -1   5    5.63    4.08
  12   1   5    4.82    4.29
 -12   1  -5    3.43    0.96
 -13   1  -5   29.89    1.62
  13   1   5   29.83    4.66
 -14  -1  -5   23.43    1.37
  14  -1   5   20.88    5.45
  14   1   5   24.63    5.54
 -14   1  -5   22.56    1.37
 -15  -1  -5    1.21    1.08
  15   1   5    0.67    4.83
 -16  -1  -5   31.35    1.37
  16   1   5   28.28    5.41
  17  -1   5   42.88    7.00
 -18  -1  -5    2.47    1.50
  18  -1   5    3.73    6.58
  18   1   5    3.12    6.66
 -18   1  -5    3.61    1.62
  19  -1   5    5.30    7.25
  20   1   5    6.56    7.50
 -20   1  -5    5.42    3.12
 -20  -2   5    3.38    2.83
  20  -2  -5    4.41    6.66
 -19  -2   5    1.52    1.62
 -18  -2   5   29.63    1.75
  18   2  -5   30.19    4.91
 -18   2   5   27.86    1.83
 -17  -2   5    5.98    1.29
  17  -2  -5    9.00    5.75
  17   2  -5    8.05    4.08
  16  -2  -5    2.25    5.20
 -16   2   5    2.33    1.33
  15  -2  -5    4.07    4.66
  15   2  -5    3.63    3.54
 -14  -2   5   13.48    1.25
 -14  -2   5   13.58    1.00
  14   2  -5   13.58    3.54
 -13  -2   5   10.90    0.83
 -13  -2   5   11.47    1.12
  13  -2  -5   13.18    4.08
 -13   2   5   10.25    1.08
  13   2  -5   10.14    2.71
 -12   2   5  147.71    3.91
  12   2  -5  149.88    5.50
 -11  -2   5  168.18    2.62
 -11  -2   5  170.01    2.37
  11   2  -5  172.10    4.00
 -10  -2   5    3.64    1.12
 -10  -2   5    2.79    0.62
  10  -2  -5    4.39    2.83
  10   2  -5    5.26    2.12
   9  -2  -5    3.24    2.75
  -9  -2   5    2.02    1.08
  -9  -2   5    1.81    0.58
   9   2  -5    1.77    1.75
  -8  -2   5    1.47    1.04
  -8  -2   5    1.62    0.54
   8  -2  -5    1.75    2.54
  -8   2   5    1.41    0.62
   8   2  -5    2.04    1.67
  -7  -2   5    1.50    0.50
  -7  -2   5    0.49    1.92
  -7  -2   5    1.14    1.00
   7  -2  -5    1.18    2.12
  -7   2   5    1.16    0.50
   7   2  -5    0.97    1.37
  -6   2   5    9.59    1.12
   6   2  -5    9.19    1.75
  -5  -2   5   33.61    1.54
  -5   2   5   35.51    1.08
   5   2  -5   34.58    1.62
  -5   2   5   36.73    2.87
   4  -2  -5  137.72    1.21
   4   2  -5  140.12    1.71
  -4   2   5  137.11    2.66
  -3  -2   5   66.57    1.21
   3  -2  -5   66.63    0.71
   2  -2  -5  126.88    2.00
   2  -2  -5  127.58    2.75
  -2  -2   5  125.75    2.33
  -2   2   5  124.48    2.04
   1  -2  -5  573.97   10.99
   1  -2  -5  572.39   11.08
  -1   2   5  569.41   11.37
   1   2  -5  579.89   11.24
   0  -2  -5   16.06    1.04
   0   2   5   16.39    1.25
  -1  -2  -5    2.43    0.50
   1  -2   5    2.78    2.25
   1   2   5    2.38    0.58
  -1   2  -5    2.83    1.92
   2  -2   5   17.39    1.42
  -2  -2  -5   16.82    1.54
  -2  -2  -5   16.61    1.33
   2  -2   5   16.67    1.42
   2   2   5   18.02    2.71
  -3  -2  -5  437.67   10.70
   3  -2   5  441.92   10.74
   4  -2   5  415.64    7.00
  -4   2  -5  415.44    7.04
  -4   2  -5  418.97    8.66
  -5  -2  -5   61.82    2.58
   6  -2   5    4.58    2.66
  -6  -2  -5    5.03    2.00
  -6  -2  -5    4.06    0.42
  -6   2  -5    3.74    0.50
   6   2   5    3.87    0.92
   6   2   5    3.49    1.83
  -6   2  -5    4.39    0.50
  -7  -2  -5  138.24    3.04
  -7  -2  -5  139.04    4.83
   8  -2   5   20.62    3.33
   8   2   5   20.08    2.37
  -8   2  -5   19.55    0.75
   9  -2   5   71.63    4.58
  10   2   5   89.65    4.29
  11  -2   5   28.28    1.62
  11  -2   5   30.32    4.21
 -11  -2  -5   29.61    1.17
  11   2   5   32.11    4.00
  12  -2   5  188.07    7.25
 -12   2  -5  188.37    3.71
  13  -2   5    1.80    4.96
 -13  -2  -5    2.25    1.17
  13   2   5    3.61    4.29
 -14  -2  -5   46.99    1.33
 -14   2  -5   48.19    1.50
 -15  -2  -5   29.00    1.12
  15  -2   5   30.54    5.87
 -15   2  -5   28.85    1.33
 -16  -2  -5   35.54    1.75
  16   2   5   31.81    5.45
 -16   2  -5   34.51    1.83
 -17  -2  -5    2.70    1.42
 -17  -2  -5    3.00    1.37
  17  -2   5    2.70    6.25
 -17   2  -5    2.70    1.54
  17   2   5    6.49    5.58
  18  -2   5    0.09    6.70
 -18  -2  -5    0.09    1.54
  18   2   5    0.09    6.29
 -18   2  -5    0.09    1.67
  19  -2   5    3.35    7.54
 -19  -2  -5    0.08    1.67
  19   2   5    1.26    6.62
  20  -3  -5    4.50    7.29
  20   3  -5    1.42    4.87
 -19  -3   5    0.94    1.58
 -19   3   5    0.94    1.96
 -18  -3   5   47.55    1.92
  18  -3  -5   46.16    6.83
 -18   3   5   44.67    2.21
  18   3  -5   49.45    4.66
 -17  -3   5    0.79    1.33
  17  -3  -5    0.39    5.29
  17   3  -5    0.39    3.91
 -16  -3   5    1.25    1.42
 -16  -3   5    1.25    1.17
 -16   3   5    1.25    1.50
 -15   3   5  114.74    3.37
  14   3  -5   98.77    4.46
 -13  -3   5    2.99    1.54
 -13  -3   5    2.19    0.87
  13  -3  -5    2.18    3.91
  13   3  -5    2.14    2.54
 -12  -3   5    9.71    0.96
 -12  -3   5    8.32    1.62
  11  -3  -5  113.96    5.66
 -10  -3   5   63.27    1.12
  10  -3  -5   65.59    3.50
  -9  -3   5  276.30    5.70
   9   3  -5  279.36    6.16
  -8  -3   5   11.09    2.29
  -8  -3   5   13.72    1.17
   8  -3  -5   12.97    2.33
  -8  -3   5   12.84    0.54
   8   3  -5   14.11    1.42
  -7  -3   5   89.35    1.83
  -7  -3   5   87.22    2.29
  -7  -3   5   86.91    3.12
  -6  -3   5   45.35    1.83
   6  -3  -5   46.92    3.04
  -6  -3   5   43.81    2.21
  -6   3   5   45.51    1.33
   6   3  -5   44.19    1.79
  -5  -3   5    2.11    1.58
   5  -3  -5    2.13    0.75
   5  -3  -5    2.10    0.62
   5   3  -5    2.10    1.25
  -5   3   5    2.11    0.92
  -4  -3   5  263.02    5.45
   4   3  -5  261.75    5.37
  -4   3   5  262.91    5.12
   3  -3  -5  108.80    1.21
   3  -3  -5  110.70    2.46
   3  -3  -5  109.96    1.12
  -3   3   5  110.59    2.54
   2  -3  -5  293.00    8.70
  -2  -3   5  296.69    8.83
   2  -3  -5  296.19    9.24
  -2   3   5  295.68    9.29
   2   3  -5  296.97    8.83
  -1   3   5  887.65   19.86
   0  -3  -5  368.44    8.33
   0  -3   5  370.86    9.33
   0   3   5  370.46    8.49
  -1  -3  -5   10.91    0.67
  -1   3  -5   11.50    2.54
   1   3   5   11.71    0.50
   1   3   5   10.44    0.62
  -2  -3  -5   49.63    1.75
   2  -3   5   50.28    3.83
   2   3   5   51.29    1.62
   3  -3   5  191.14    3.12
  -3  -3  -5  192.80    1.46
   3   3   5  194.89    1.33
   3   3   5  196.49    2.33
  -3   3  -5  194.70    3.29
  -4  -3  -5   48.31    1.08
   4  -3   5   47.04    0.67
   4  -3   5   47.72    2.75
   4  -3   5   47.64    0.67
  -4  -3  -5   46.98    0.67
   5  -3   5    3.31    0.37
  -5  -3  -5    3.25    0.33
   5  -3   5    3.44    2.25
  -5  -3  -5    3.22    0.83
   5   3   5    3.29    0.92
   5   3   5    3.46    1.71
  -6  -3  -5  115.57    2.25
  -6  -3  -5  113.59    1.33
   6   3   5  115.68    1.75
   6   3   5  116.82    2.29
  -6   3  -5  114.21    1.12
  -7  -3  -5  164.65    5.00
   7  -3   5  164.03    3.58
   7   3   5  161.59    4.87
   8  -3   5   56.55    3.46
   8  -3   5   58.49    0.96
  -8  -3  -5   57.73    0.87
  -8  -3  -5   58.19    1.33
  -9  -3  -5    1.01    0.96
  -9  -3  -5    1.03    3.04
   9  -3   5    1.19    0.67
  -9  -3  -5    1.00    0.54
  -9   3  -5    1.19    0.67
   9   3   5    1.55    2.62
 -10  -3  -5   25.67    1.17
  10  -3   5   26.22    1.37
  10  -3   5   26.76    4.33
  10   3   5   27.31    3.58
 -10   3  -5   25.67    1.33
  11  -3   5   12.59    4.75
  11  -3   5   10.30    1.12
 -11  -3  -5   10.23    0.83
  11   3   5   11.22    3.33
 -12  -3  -5   35.80    0.96
 -12   3  -5   35.74    1.21
  13  -3   5    6.10    5.16
 -13  -3  -5    7.67    1.08
  13  -3   5    8.27    1.58
 -13  -3  -5    8.75    1.42
 -13   3  -5    6.43    1.21
 -14  -3  -5   30.16    1.25
 -14   3  -5   28.07    1.50
 -15  -3  -5    0.73    1.46
  15  -3   5    0.02    5.75
  15   3   5    0.02    4.41
  16  -3   5    7.69    6.08
 -16  -3  -5    9.69    1.21
  17  -3   5    2.97    6.75
 -17  -3  -5    0.57    1.33
  17   3   5    1.37    5.20
  18  -3   5    0.59    6.70
 -18  -3  -5    0.61    1.54
  18   3   5    3.83    5.87
  19   3   5   15.59    6.33
 -18  -4   5    2.16    1.42
  18   4  -5    1.21    3.87
  17  -4  -5    4.14    6.12
 -17   4   5    5.41    1.87
  17   4  -5    5.41    3.54
  16  -4  -5    3.31    5.04
 -16  -4   5    3.31    1.75
 -15  -4   5   26.08    1.92
 -15  -4   5   26.31    1.21
 -15   4   5   25.59    1.67
 -14  -4   5    1.72    1.71
  14  -4  -5    5.92    4.62
 -14  -4   5    3.53    1.00
  14   4  -5    3.47    2.58
 -14   4   5    2.12    1.33
 -13  -4   5    4.84    1.71
  13  -4  -5    4.98    4.21
 -13  -4   5    4.92    0.83
  13   4  -5    5.19    2.37
 -12  -4   5   14.93    1.04
  12  -4  -5   16.91    4.00
 -11  -4   5   64.76    1.21
 -10  -4   5    4.61    0.92
  10  -4  -5    4.69    3.25
  10   4  -5    5.51    1.79
  -9  -4   5    1.18    1.29
  -9  -4   5    0.77    2.58
  -9  -4   5    0.77    0.58
  -9   4   5    0.77    0.67
   8  -4  -5  235.61    7.79
  -8  -4   5  231.77    5.70
  -8  -4   5  230.76    6.79
  -8   4   5  235.48    5.79
   8   4  -5  234.36    6.12
  -7  -4   5    5.02    1.79
   7  -4  -5    4.59    2.29
  -7  -4   5    4.49    1.25
   7   4  -5    4.59    1.00
  -7   4   5    4.59    0.54
  -6  -4   5   15.45    1.87
  -6  -4   5   13.68    1.71
  -6   4   5   14.71    1.12
   5  -4  -5   58.19    1.71
   5  -4  -5   56.92    1.62
  -5  -4   5   57.15    2.25
   5   4  -5   58.54    2.04
  -5   4   5   56.96    1.79
  -4  -4   5  148.00    2.75
   4  -4  -5  149.37    3.75
   4  -4  -5  145.99    2.46
  -4   4   5  149.37    4.46
   4   4  -5  146.42    2.66
  -3  -4   5   12.22    0.71
   3  -4  -5   10.09    1.42
   3  -4  -5   11.00    0.25
  -3   4   5   11.04    0.62
   3   4  -5   12.58    0.79
  -3   4   5    7.25    1.62
   2  -4  -5   40.28    1.54
  -2  -4   5   40.15    1.87
   2  -4  -5   39.79    1.79
   2  -4  -5   40.45    2.66
  -2   4   5   40.53    2.54
   1  -4  -5  107.78    1.75
  -1  -4   5  111.49    3.46
  -1   4   5  110.04    2.29
   0  -4  -5 3435.90   63.75
   0   4   5 3436.38   63.92
  -1  -4  -5   20.52    0.87
  -1  -4  -5   21.62    0.75
   1   4   5   21.39    0.79
  -1   4  -5   20.18    2.62
   1   4   5   20.50    0.83
  -2  -4  -5  254.48    3.91
   2   4   5  254.10    3.75
   3  -4   5   30.51    2.91
   3   4   5   31.60    2.96
  -3   4  -5   33.37    4.83
  -4  -4  -5   70.61    0.96
   4  -4   5   71.12    0.50
   4  -4   5   67.12    2.33
   4   4   5   71.33    0.67
   4   4   5   71.48    1.08
  -5  -4  -5   59.16    1.08
   5  -4   5   61.77    3.54
  -6  -4  -5  118.86    3.00
  -6  -4  -5  120.38    2.12
  -6  -4  -5  118.72    2.62
  -7  -4  -5    5.11    1.21
  -7  -4  -5    4.69    0.50
   7   4   5    4.63    1.79
  -7   4  -5    4.73    0.67
  -8  -4  -5   40.57    1.67
   8  -4   5   40.63    1.50
  -8  -4  -5   39.09    2.25
   8  -4   5   37.72    4.50
   9  -4   5   15.00    0.92
  -9  -4  -5   14.14    0.83
   9  -4   5   16.08    3.75
  -9  -4  -5   15.15    1.54
   9   4   5   13.78    2.71
  -9   4  -5   13.28    1.00
 -10  -4  -5   82.42    2.33
  10  -4   5   81.85    5.29
 -11  -4  -5   18.79    0.92
  11  -4   5   18.91    1.12
 -11   4  -5   19.76    1.29
  12  -4   5    0.60    4.54
 -12  -4  -5    0.79    0.79
 -12  -4  -5    0.63    1.33
  12  -4   5    0.81    1.12
 -12   4  -5    0.54    0.96
  13  -4   5   32.73    5.62
 -13   4  -5   30.88    1.71
 -14  -4  -5    0.91    1.00
 -14  -4  -5    0.91    1.42
  14  -4   5    3.73    5.25
 -14   4  -5    0.93    1.12
  15  -4   5    6.56    5.62
 -15  -4  -5    6.14    1.58
  15   4   5    5.55    4.08
 -16  -4  -5   17.21    1.92
  16  -4   5   17.85    6.33
  16   4   5   15.23    4.71
 -16   4  -5   16.77    1.58
 -17  -4  -5    0.10    1.33
 -17   4  -5    0.08    1.58
 -18  -4  -5    1.26    1.37
 -18   4  -5    1.26    1.67
  19  -4   5   21.98    8.04
 -19  -4  -5   21.49    1.83
 -19   4  -5   22.96    2.17
  19   4   5   20.71    8.04
 -19  -5   5    5.34    1.58
  19  -5  -5    3.83    6.66
  19   5  -5    4.23    4.37
 -19   5   5    3.83    2.08
  18   5  -5    4.53    3.41
 -18   5   5    5.42    2.00
 -17  -5   5    0.44    1.25
  17  -5  -5    1.03    5.66
  17   5  -5    2.20    3.29
 -17   5   5    0.31    1.79
 -16  -5   5   10.46    2.33
 -16  -5   5    9.07    1.25
  16  -5  -5   11.78    5.58
  16   5  -5    8.81    3.08
 -15  -5   5    1.06    2.12
  15  -5  -5    4.09    4.87
 -15  -5   5    2.92    1.17
 -15   5   5    1.55    1.50
  15   5  -5    3.29    2.54
 -14  -5   5    5.99    2.04
 -14  -5   5    5.51    1.08
  14  -5  -5    3.32    4.46
  14   5  -5    4.22    2.33
  13  -5  -5    7.90    4.50
 -13  -5   5    7.01    0.96
 -13  -5   5    6.25    1.96
 -12  -5   5   10.94    1.00
  12   5  -5   10.50    1.92
 -11  -5   5   45.50    1.00
 -11   5   5   43.78    1.17
 -10  -5   5    0.11    0.75
  10  -5  -5    0.11    4.12
 -10  -5   5    0.11    1.54
 -10   5   5    0.11    0.79
  -9  -5   5    2.63    2.62
  -9  -5   5    0.93    0.67
   9  -5  -5    1.18    3.04
  -9   5   5    0.93    0.71
   8  -5  -5   29.90    3.41
  -8  -5   5   33.57    2.75
  -8   5   5   32.49    1.54
  -7  -5   5   70.99    2.50
   7  -5  -5   71.22    4.04
   7  -5  -5   72.90    1.50
  -7   5   5   72.19    1.87
   7   5  -5   72.84    2.08
  -6  -5   5  245.98    4.21
   6  -5  -5  247.63    5.62
   6  -5  -5  246.01    3.58
  -6  -5   5  250.24    4.33
  -6   5   5  247.21    3.75
  -6   5   5  246.70    3.71
   6   5  -5  249.42    3.91
   5  -5  -5   14.24    2.66
   5  -5  -5   13.21    0.87
   5  -5  -5   13.35    0.87
   5   5  -5   13.25    1.25
  -5   5   5   12.97    0.92
  -5   5   5   13.75    1.08
  -4  -5   5    8.94    1.71
   4  -5  -5    8.60    1.00
   4  -5  -5    8.34    0.79
  -4   5   5    8.43    1.12
   4   5  -5    8.47    1.29
  -3  -5   5    4.25    1.33
   3  -5  -5    4.42    0.83
   3  -5  -5    4.05    0.42
   3  -5  -5    4.53    1.75
  -3   5   5    4.34    0.87
  -3   5   5    4.32    2.12
  -2  -5   5  766.77   13.12
  -2   5   5  763.23   13.87
   1  -5  -5    9.46    1.96
   1  -5  -5   10.05    1.54
  -1   5   5    9.46    1.46
  -1   5   5    9.19    2.04
   0  -5   5  335.41    6.33
   0  -5  -5  337.75    5.12
   0   5   5  336.76    5.41
  -1  -5  -5   29.51    2.12
   1   5   5   29.30    2.08
   2  -5   5  375.19    8.08
   3  -5   5  521.51    9.95
  -3  -5  -5  512.87    8.83
  -3  -5  -5  521.21    8.49
  -4  -5  -5    0.25    1.21
   4   5   5    0.12    1.33
   4   5   5    0.14    0.50
   5  -5   5   22.86    2.62
   5   5   5   22.96    1.50
  -6  -5  -5    1.99    1.29
   6  -5   5    0.37    2.83
  -6   5  -5    0.85    0.46
   6   5   5    0.11    1.33
   7  -5   5    2.93    3.00
  -7  -5  -5    2.89    0.50
   7  -5   5    2.99    0.50
  -7  -5  -5    3.50    1.33
  -7  -5  -5    2.86    1.33
   7   5   5    3.29    1.58
  -8  -5  -5  219.50    4.50
  -9  -5  -5   71.95    3.00
  -9   5  -5   72.41    2.62
 -10  -5  -5  237.88    5.54
 -10  -5  -5  240.28    4.58
  10   5   5  242.10    5.50
 -10   5  -5  239.84    4.21
 -11   5  -5   54.66    1.87
 -12  -5  -5   35.14    0.96
 -13  -5  -5   17.26    1.08
  13  -5   5   17.02    5.12
 -14  -5  -5  117.00    2.75
 -14  -5  -5  118.43    3.33
  14   5   5  119.66    5.08
 -15  -5  -5   21.39    1.37
  15  -5   5   21.56    6.16
  15   5   5   22.44    4.16
 -15   5  -5   19.49    1.58
 -16  -5  -5   13.60    1.21
 -16  -5  -5   13.06    1.87
  16  -5   5   11.37    5.95
 -16   5  -5   11.37    1.54
  17  -5   5   47.88    7.04
 -17  -5  -5   45.84    1.67
 -17   5  -5   43.46    1.92
 -18  -5  -5    4.89    2.21
 -18  -5  -5    4.38    1.50
 -18   5  -5    4.38    1.87
  19  -5   5    6.64    8.16
 -19  -5  -5    1.71    1.71
 -19   5  -5    2.37    2.04
 -19  -6   5    0.14    1.54
 -19   6   5    0.15    2.25
  18  -6  -5    0.05    6.12
  18   6  -5    0.05    3.54
 -17  -6   5    3.47    1.29
  17  -6  -5    3.47    5.75
 -17  -6   5    5.56    2.54
  17   6  -5    3.47    2.96
 -17   6   5    4.04    1.96
  16  -6  -5    3.88    5.29
  16   6  -5    0.13    2.37
 -15  -6   5    3.13    2.29
 -15  -6   5    3.62    1.17
  15  -6  -5    5.91    5.33
  15   6  -5    3.13    2.42
 -14  -6   5   41.73    1.21
  14  -6  -5   44.25    5.29
 -14  -6   5   42.42    2.29
  14   6  -5   43.28    2.21
  13  -6  -5    0.06    4.04
 -13  -6   5    1.64    2.21
 -13  -6   5    0.33    1.00
  13   6  -5    1.55    1.83
 -12  -6   5    9.80    2.08
 -12  -6   5   10.94    0.96
 -12   6   5   10.16    1.17
 -11   6   5    6.38    1.00
 -10  -6   5  136.47    3.12
 -10  -6   5  142.20    4.75
  10   6  -5  138.83    2.66
  -9  -6   5   26.47    1.83
   9   6  -5   26.94    1.37
  -9   6   5   26.07    0.96
   8  -6  -5   29.73    3.71
  -8  -6   5   29.58    2.37
  -8  -6   5   28.53    2.04
   8   6  -5   29.20    1.67
  -8   6   5   27.56    1.17
   7  -6  -5   59.83    0.62
  -7  -6   5   59.72    1.58
  -7  -6   5   61.05    1.71
   7  -6  -5   61.40    2.91
  -7   6   5   59.97    0.75
  -6  -6   5   29.68    1.17
   6  -6  -5   29.54    0.67
   6  -6  -5   29.09    2.66
  -6  -6   5   30.63    1.54
   6   6  -5   30.06    1.04
  -6   6   5   29.05    0.92
  -6   6   5   29.20    0.58
  -5  -6   5   24.49    1.62
   5  -6  -5   24.51    2.58
   5  -6  -5   24.43    0.87
  -5  -6   5   24.35    1.87
  -5  -6   5   24.43    1.08
  -5   6   5   25.19    1.00
   4  -6  -5  184.24    4.79
   4  -6  -5  180.56    5.00
  -4  -6   5  183.46    5.00
   4  -6  -5  180.34    6.33
  -4   6   5  180.64    5.04
  -3  -6   5  228.62    6.20
  -3  -6   5  230.28    6.54
   3  -6  -5  229.12    5.54
  -3  -6   5  228.93    5.70
  -3   6   5  227.08    5.79
   2  -6  -5    2.58    0.83
   2  -6  -5    2.58    1.62
  -2  -6   5    2.58    1.96
  -2  -6   5    3.06    1.25
  -2   6   5    2.58    0.92
   2   6  -5    3.94    1.50
  -2   6   5    2.58    1.92
   1  -6  -5    7.15    1.33
  -1  -6   5    6.87    2.62
   1  -6  -5    7.34    1.92
   1   6  -5    7.38    2.29
   0  -6  -5  137.57    4.16
   0  -6   5  134.01    5.12
   0  -6  -5  133.36    3.91
   0   6   5  133.57    4.37
  -1  -6  -5  376.30    7.00
   1  -6   5  382.20    8.16
  -2  -6  -5   11.89    1.25
   2   6   5   11.21    1.12
  -2   6  -5   12.71    3.04
   3  -6   5  165.15    7.25
  -3  -6  -5  161.72    6.04
  -4  -6  -5  492.97   10.04
  -5  -6  -5   15.24    1.33
   5  -6   5   13.93    2.75
   5   6   5   14.00    1.21
   5   6   5   14.29    0.54
  -6  -6  -5    6.59    1.71
   6  -6   5    6.57    0.83
   6   6   5    5.83    0.87
  -7  -6  -5  129.24    3.25
   7  -6   5  132.57    5.25
   7  -6   5  131.92    2.50
   7   6   5  129.24    3.16
  -8  -6  -5    8.28    0.67
  -8  -6  -5    8.55    1.54
   8  -6   5    9.67    3.54
  -8   6  -5    7.61    0.67
   8   6   5    9.04    1.62
   9  -6   5   13.85    0.67
  -9  -6  -5   14.90    0.79
  -9  -6  -5   15.51    1.79
  -9  -6  -5   15.62    1.92
  -9   6  -5   13.43    1.04
  10  -6   5    7.61    3.87
 -10  -6  -5    8.08    0.83
 -10  -6  -5    7.61    2.08
 -10   6  -5    7.61    0.83
  11  -6   5    2.31    4.41
 -11  -6  -5    4.34    0.87
 -11  -6  -5    4.70    2.62
 -11  -6  -5    4.38    1.71
  11   6   5    5.33    2.21
  12  -6   5   13.42    4.79
 -12  -6  -5   15.57    0.87
 -12  -6  -5   16.10    3.04
 -12  -6  -5   16.92    2.04
 -12   6  -5   15.05    1.21
  13  -6   5    0.17    1.17
  13  -6   5    0.17    4.50
 -13  -6  -5    1.30    2.29
 -13   6  -5    0.59    1.25
  13   6   5    0.17    2.79
 -14  -6  -5   92.69    3.50
 -14  -6  -5   91.32    2.79
 -15  -6  -5    9.51    1.17
  15  -6   5   10.46    5.75
  15   6   5    9.82    3.29
 -15   6  -5    9.05    1.42
  16   6   5   13.33    3.50
 -16   6  -5   13.25    1.67
 -17  -6  -5    0.38    1.46
 -17  -6  -5    0.12    2.25
  17  -6   5    3.47    6.70
 -17   6  -5    0.12    1.67
  17   6   5    0.12    4.91
 -18  -6  -5    1.06    1.58
 -18   6  -5    1.06    2.00
 -19  -6  -5    1.29    1.67
  19  -6   5    3.59    7.95
 -19  -7   5    0.61    1.71
  19  -7  -5    3.48    7.16
  18  -7  -5   13.36    6.66
 -18  -7   5   10.58    1.54
  17  -7  -5    6.58    6.12
 -17  -7   5    5.17    1.37
 -17   7   5    4.74    1.96
 -16  -7   5   12.20    3.04
  16  -7  -5   12.85    5.33
 -16   7   5   12.66    1.83
  16   7  -5   12.13    2.50
  15  -7  -5    6.84    5.08
 -15  -7   5    8.67    1.12
  15   7  -5    8.29    2.08
  14  -7  -5   19.63    5.04
 -14  -7   5   19.75    2.79
 -14  -7   5   19.06    1.21
  14   7  -5   17.27    2.04
  13  -7  -5    7.57    4.62
 -13  -7   5    5.89    1.04
 -13  -7   5    4.88    2.33
 -13   7   5    6.64    1.37
  13   7  -5    6.29    1.75
 -12  -7   5    4.60    1.04
  12  -7  -5    7.81    4.58
 -12  -7   5    6.04    2.08
 -12   7   5    4.60    1.21
  12   7  -5    4.92    1.62
 -11  -7   5    5.95    3.87
  11  -7  -5    2.51    3.66
 -11  -7   5    2.89    1.92
  10  -7  -5   49.77    4.58
 -10  -7   5   50.34    3.54
 -10  -7   5   48.30    2.75
  10   7  -5   48.99    2.17
   9  -7  -5   36.48    4.75
  -9  -7   5   35.89    2.21
  -9  -7   5   34.10    2.54
   8  -7  -5   10.65    0.71
   8  -7  -5   10.10    3.46
  -8  -7   5   10.83    2.08
  -8  -7   5   11.53    2.00
   8   7  -5   11.04    1.33
  -7  -7   5  496.91    7.95
  -7  -7   5  496.70    7.66
   7  -7  -5  502.54    9.45
   6  -7  -5    5.26    2.75
  -6  -7   5    5.24    1.75
   6  -7  -5    5.13    0.75
  -6  -7   5    5.45    1.67
  -6   7   5    5.47    0.96
   5  -7  -5   56.99    4.16
  -5  -7   5   56.94    3.37
   5  -7  -5   54.50    2.21
  -5  -7   5   54.94    2.96
  -5  -7   5   54.92    2.21
  -5   7   5   53.28    2.33
  -4  -7   5  533.42   10.70
  -4  -7   5  534.26   10.12
  -4  -7   5  528.85   10.78
  -4   7   5  528.70   10.24
   3  -7  -5    2.37    2.21
   3  -7  -5    1.48    1.04
  -3  -7   5    1.68    1.58
  -3  -7   5    1.65    0.92
   3  -7  -5    1.97    0.50
  -3   7   5    2.52    1.21
  -2  -7   5  111.99    4.83
   2  -7  -5  112.92    3.66
  -2  -7   5  114.20    4.00
  -2   7   5  112.81    3.75
   2   7  -5  115.55    4.33
   1  -7  -5   73.75    2.00
  -1  -7   5   72.99    3.21
   1  -7  -5   75.37    2.71
  -1   7   5   74.20    2.17
  -1   7   5   76.55    3.25
   1   7  -5   77.44    3.12
   0  -7  -5   59.40    2.29
   0  -7  -5   58.50    2.58
   0  -7   5   62.52    3.79
   0   7   5   58.56    3.04
   0   7  -5   62.48    3.87
  -1  -7  -5  247.73    3.04
  -1  -7  -5  246.88    2.96
   1   7   5  249.96    3.46
  -1   7  -5  247.79    4.66
  -2  -7  -5   51.54    2.75
   2  -7   5   49.92    4.16
   2   7   5   50.09    2.75
  -3  -7  -5   19.00    1.46
   3  -7   5   16.07    2.91
   3   7   5   18.22    1.21
   4  -7   5  178.37    6.00
  -4  -7  -5  179.46    4.58
   5   7   5   13.90    1.25
   6  -7   5   83.17    4.71
  -6  -7  -5   78.71    2.79
   7  -7   5   15.90    3.37
  -8  -7  -5  167.64    3.75
   8  -7   5  170.00    6.66
  -8  -7  -5  169.79    2.87
   8   7   5  170.42    2.66
  -9  -7  -5   51.40    2.12
   9  -7   5   49.69    4.62
   9  -7   5   53.86    1.04
   9   7   5   53.00    1.58
   9   7   5   53.69    1.29
  10  -7   5   40.84    4.71
 -10  -7  -5   43.64    0.92
  10  -7   5   43.87    0.79
  10   7   5   44.91    1.58
 -11  -7  -5   11.53    2.08
  11  -7   5   13.32    4.50
 -11  -7  -5   11.15    0.87
 -11  -7  -5   12.27    1.92
 -11   7  -5   12.06    1.08
  11   7   5   12.61    1.75
 -12  -7  -5   20.84    2.75
 -12  -7  -5   19.34    1.12
  12  -7   5   18.55    1.04
 -12  -7  -5   19.49    2.42
  12  -7   5   22.15    5.70
  12   7   5   18.97    2.04
 -13  -7  -5   24.59    1.17
  13  -7   5   24.72    5.70
 -13  -7  -5   26.23    2.42
  13   7   5   22.23    2.29
 -13   7  -5   22.46    1.42
 -14  -7  -5    6.90    1.21
 -14  -7  -5    5.25    2.42
 -14   7  -5    6.45    1.54
  14   7   5    5.61    2.46
 -15  -7  -5    3.16    2.46
 -15  -7  -5    1.07    1.21
  15  -7   5    0.19    6.00
  15   7   5    0.75    2.66
 -16  -7  -5    1.44    2.50
 -16  -7  -5    2.49    1.25
 -16   7  -5    0.85    1.62
 -17  -7  -5    0.59    1.42
 -17   7  -5    0.59    1.83
 -18  -7  -5    2.65    2.62
 -18   7  -5    2.61    1.87
  19  -7   5    8.77    8.29
 -19  -8   5   12.55    2.29
  19  -8  -5   13.67    7.25
  18  -8  -5    0.68    6.58
 -18  -8   5    0.15    3.29
 -18  -8   5    0.15    1.46
 -17  -8   5   33.17    3.21
 -17  -8   5   35.10    1.62
  17  -8  -5   32.64    6.20
  16  -8  -5    4.14    5.95
 -16  -8   5    2.52    1.29
 -16   8   5    1.80    1.79
 -15  -8   5   68.25    3.71
  15  -8  -5   70.74    6.66
  15   8  -5   67.94    3.08
  14  -8  -5   10.90    4.75
 -14  -8   5    9.44    2.50
 -14  -8   5    9.72    1.17
  14   8  -5    9.44    1.92
 -14   8   5    9.44    1.46
  13  -8  -5   35.77    4.62
 -13  -8   5   38.95    3.04
 -13  -8   5   39.90    1.25
  13   8  -5   38.07    1.96
  12  -8  -5    5.19    4.75
 -12  -8   5    2.06    2.79
 -12   8   5    2.82    1.29
 -11  -8   5   30.69    1.04
  11  -8  -5   30.37    4.37
 -11  -8   5   32.84    3.62
  11   8  -5   31.24    1.67
 -11   8   5   30.27    1.17
 -10  -8   5   61.80    2.42
 -10   8   5   59.23    1.12
  10   8  -5   60.97    1.67
  -9  -8   5    1.32    2.29
  -9  -8   5    1.88    1.96
   9  -8  -5    1.88    3.75
  -9   8   5    0.94    0.79
   9   8  -5    0.68    1.33
  -8  -8   5   57.28    2.25
  -8  -8   5   56.25    2.54
   8  -8  -5   58.27    5.08
   7  -8  -5   14.39    3.16
  -7  -8   5   14.31    1.92
  -7  -8   5   13.95    1.37
  -7  -8   5   15.81    2.12
   6  -8  -5    8.02    3.00
  -6  -8   5    5.76    1.71
   6  -8  -5    6.22    0.96
  -6  -8   5    6.27    2.00
   5  -8  -5    9.36    1.00
  -5  -8   5   10.98    1.87
   5  -8  -5    7.85    2.75
  -5  -8   5    9.95    0.87
  -4  -8   5  119.67    4.62
  -4  -8   5  122.22    4.21
   4  -8  -5  118.93    5.08
  -4  -8   5  121.40    3.37
   4  -8  -5  122.35    3.58
  -4   8   5  119.82    3.71
  -3  -8   5   45.54    3.62
  -3  -8   5   41.79    2.17
   3  -8  -5   42.95    3.66
  -3  -8   5   42.99    2.91
   3  -8  -5   43.16    2.33
  -3   8   5   43.24    2.79
   2  -8  -5   95.83    3.41
  -2  -8   5   97.52    2.75
  -2  -8   5   98.85    3.71
   2   8  -5   97.06    3.33
   1  -8  -5   97.89    3.12
  -1  -8   5   98.98    3.41
  -1  -8   5   99.13    4.50
  -1   8   5   99.41    4.54
   1   8  -5  101.97    4.41
   0  -8   5   97.18    5.12
   0  -8  -5   97.81    4.25
   0  -8  -5  101.16    3.91
   0   8   5   96.82    4.66
   0   8  -5   99.35    5.45
   1  -8   5   87.23    4.41
   1  -8   5   90.09    3.12
  -1  -8  -5   88.30    3.08
  -2  -8  -5  106.60    2.58
   2  -8   5  106.49    4.58
   2   8   5  107.72    3.25
   3  -8   5  148.08    5.95
   3   8   5  149.09    4.21
   4  -8   5    9.32    3.12
  -4  -8  -5   10.38    1.54
   4   8   5   10.04    1.21
  -5  -8  -5   64.21    2.50
   5  -8   5   61.85    4.16
  -6  -8  -5   14.19    2.00
   6  -8   5   13.37    3.62
  -7  -8  -5  240.32    5.41
  -8  -8  -5   60.67    2.87
  -9  -8  -5  101.54    3.29
   9  -8   5   96.61    5.62
  10  -8   5   65.42    5.45
 -10  -8  -5   70.40    2.12
 -11  -8  -5    3.51    0.96
 -11  -8  -5    4.16    2.29
 -12  -8  -5    2.27    1.00
 -12  -8  -5    2.76    2.42
  12   8   5    2.57    1.12
  13   8   5  100.45    2.21
 -14  -8  -5    2.96    2.54
  14  -8   5    3.72    1.58
  14  -8   5    3.48    5.45
 -14   8  -5    2.96    1.29
  15  -8   5    5.73    5.83
 -15  -8  -5    6.72    2.79
 -15   8  -5    6.13    1.46
 -16   8  -5    3.91    1.50
  17  -8   5    0.07    6.75
 -17  -8  -5    1.34    1.54
 -17   8  -5    0.07    1.67
 -18  -8  -5    3.43    1.62
 -18   8  -5    4.18    2.00
 -18  -9   5    0.61    3.58
  18  -9  -5    0.61    6.75
 -18  -9   5    1.29    1.46
 -18   9   5    0.61    2.25
 -17  -9   5    0.20    1.29
 -17  -9   5    0.98    3.46
  17  -9  -5    0.20    6.25
  16  -9  -5    3.34    5.54
 -16  -9   5    2.83    1.33
 -16  -9   5    4.28    3.29
 -15  -9   5   65.10    1.75
  15  -9  -5   70.91    6.54
 -15   9   5   64.68    2.25
 -14  -9   5    6.15    3.00
 -14  -9   5    5.69    1.21
  14  -9  -5    4.83    5.12
 -14   9   5    5.19    1.50
 -13  -9   5   50.16    3.08
  13  -9  -5   51.30    5.58
 -13   9   5   50.33    1.75
  13   9  -5   49.36    2.17
 -12  -9   5   12.13    2.58
  12   9  -5   11.06    1.79
 -12   9   5   10.95    1.25
  11  -9  -5    7.87    4.08
 -11  -9   5    7.54    2.42
  10  -9  -5   19.00    0.62
  10  -9  -5   21.21    4.46
 -10  -9   5   20.62    2.79
  -9  -9   5  202.79    5.58
  -9  -9   5  205.17    5.16
   9  -9  -5  206.62    7.66
  -9  -9   5  203.48    5.33
   9  -9  -5  202.13    4.08
  -8  -9   5    8.11    1.75
  -8  -9   5    7.90    2.25
   8  -9  -5   11.06    3.83
  -7  -9   5   10.28    1.46
  -7  -9   5   10.60    2.37
   7  -9  -5   12.29    3.66
  -6  -9   5   33.80    1.42
   6  -9  -5   34.37    3.58
   6  -9  -5   34.41    1.50
  -6  -9   5   33.29    2.46
  -6   9   5   33.04    1.75
   5  -9  -5  250.49    3.21
  -5  -9   5  249.65    4.21
   5  -9  -5  256.64    5.12
  -5  -9   5  252.64    3.00
  -5  -9   5  253.91    4.04
  -4  -9   5   14.25    2.50
   4  -9  -5   15.18    3.25
  -4  -9   5   13.75    1.21
   3  -9  -5  116.10    4.16
  -3  -9   5  113.05    3.37
  -3  -9   5  114.23    4.00
   3  -9  -5  112.86    2.75
   2  -9  -5  142.34    3.96
   2  -9  -5  143.92    2.87
  -2  -9   5  140.61    3.33
  -1  -9   5  642.71   12.99
   1  -9  -5  644.76   13.32
  -1  -9   5  640.90   13.62
   1   9  -5  637.83   13.49
   0  -9   5   58.27    4.00
   0  -9  -5   58.65    3.16
   0  -9   5   56.21    2.87
   0   9   5   57.74    3.79
  -1  -9  -5   10.95    2.04
   1  -9   5   10.36    3.21
   1  -9   5   13.09    2.12
  -1  -9  -5   12.82    1.92
   1   9   5   12.70    2.71
   2  -9   5   82.18    4.96
   2  -9   5   85.44    3.25
  -2  -9  -5   83.84    3.33
  -2  -9  -5   84.68    2.96
   2   9   5   84.28    3.83
  -3  -9  -5   95.01    2.79
   3  -9   5   99.50    4.62
  -3  -9  -5   95.67    1.96
  -4  -9  -5   28.97    0.92
  -4  -9  -5   29.77    1.92
   4  -9   5   28.57    1.67
   4  -9   5   29.31    3.75
   4   9   5   29.35    1.62
  -5  -9  -5   79.31    3.46
   6  -9   5  103.96    5.12
  -6  -9  -5  101.10    2.96
  -7  -9  -5   68.32    2.46
   7  -9   5   70.60    5.45
   8  -9   5   70.97    5.66
  -8  -9  -5   66.31    3.75
   9  -9   5  110.52    6.54
  -9  -9  -5  103.95    4.00
 -10  -9  -5    3.09    2.12
 -10  -9  -5    3.09    0.87
  10  -9   5    3.09    4.58
  10  -9   5    3.09    1.46
 -11  -9  -5    5.02    1.12
  11  -9   5    6.22    5.25
  11  -9   5    5.53    1.71
  12  -9   5   45.00    6.37
  12  -9   5   40.85    2.08
 -12  -9  -5   43.96    2.96
 -12  -9  -5   43.10    1.50
  13  -9   5    3.71    5.62
  13  -9   5    4.97    1.79
 -13  -9  -5    5.43    2.83
 -14  -9  -5    5.16    2.83
  14  -9   5    5.35    1.92
 -14  -9  -5    5.20    1.17
 -15  -9  -5   23.73    3.00
 -15  -9  -5   22.89    1.25
 -16  -9  -5    2.36    1.33
 -16  -9  -5    2.60    3.21
  16  -9   5    1.88    6.75
  17  -9   5    1.20    7.08
 -17  -9  -5    5.20    3.12
 -17  -9  -5    2.55    1.46
 -18  -9  -5    0.45    1.62
 -18  -9  -5    1.12    3.12
  18  -9   5    0.32    7.45
 -18 -10   5    5.74    3.75
  18 -10  -5    6.86    6.91
 -18 -10   5    7.74    2.29
 -17 -10   5    0.92    1.50
 -17 -10   5    0.08    3.54
  17 -10  -5    2.67    6.16
 -16 -10   5    5.63    3.58
  16 -10  -5   10.94    6.70
 -15 -10   5   35.59    1.54
  14 -10  -5    3.81    4.91
 -14 -10   5    5.85    3.21
 -14 -10   5    3.81    1.25
 -13 -10   5    2.56    3.21
 -13 -10   5    3.35    1.17
  13 -10  -5    2.56    4.71
 -13 -10   5    2.56    2.83
 -12 -10   5   12.16    3.00
 -12 -10   5   10.37    2.29
 -11 -10   5   10.60    2.96
  10 -10  -5   28.85    1.04
  10 -10  -5   30.66    4.91
   9 -10  -5   64.14    2.08
  -9 -10   5   64.33    2.96
  -9 -10   5   63.16    3.21
   8 -10  -5    5.24    3.96
  -8 -10   5    3.81    2.04
   8 -10  -5    4.75    1.25
  -7 -10   5  116.50    2.75
  -7 -10   5  120.01    4.21
  -7 -10   5  116.86    3.75
   6 -10  -5   33.45    1.21
  -6 -10   5   34.19    2.17
  -6 -10   5   33.79    1.08
   6 -10  -5   35.83    3.62
  -5 -10   5    1.23    2.25
  -5 -10   5    1.23    1.83
   5 -10  -5    1.23    2.91
  -4 -10   5   53.69    2.87
   4 -10  -5   56.38    2.42
  -4 -10   5   53.56    1.96
  -3 -10   5  623.75    9.83
  -3 -10   5  629.37    9.49
  -2 -10   5  195.26    6.20
   2 -10  -5  191.59    4.91
  -2 -10   5  190.75    5.25
   2  10  -5  192.54    5.87
   1 -10  -5  137.87    4.21
  -1 -10   5  135.85    4.75
   0 -10  -5  159.71    3.75
   0 -10   5  160.22    4.71
   0 -10   5  157.37    3.41
   1 -10   5  462.02    9.12
   2 -10   5  158.25    4.12
  -3 -10  -5   97.92    3.62
   3 -10   5   96.67    3.46
  -3 -10  -5  100.51    2.96
   3  10   5   98.63    3.96
  -4 -10  -5   10.71    0.79
   4 -10   5   10.83    3.46
  -4 -10  -5   10.33    1.62
   4  10   5   10.90    1.75
  -5 -10  -5   17.74    2.25
   5 -10   5   15.23    1.62
  -6 -10  -5   43.80    2.46
   6 -10   5   44.93    4.37
   6 -10   5   42.79    1.75
   7 -10   5   97.87    2.71
  -7 -10  -5   99.53    3.21
   7 -10   5   98.90    5.58
   8 -10   5   29.70    1.96
  -8 -10  -5   30.46    2.66
  -9 -10  -5   29.18    2.37
   9 -10   5   29.29    1.67
   9 -10   5   31.14    4.91
 -10 -10  -5    2.70    2.62
 -10 -10  -5    1.33    0.96
  10 -10   5    1.39    4.54
 -11 -10  -5    9.39    2.50
  11 -10   5   12.74    5.25
 -11 -10  -5    9.56    1.08
 -12 -10  -5    0.04    1.12
  12 -10   5    0.04    5.00
  12 -10   5    0.04    1.75
 -12 -10  -5    2.76    2.75
  13 -10   5   25.59    2.17
 -13 -10  -5   25.74    3.12
 -13 -10  -5   25.36    1.50
  14 -10   5   12.97    6.16
 -14 -10  -5   13.56    3.00
 -14 -10  -5   14.74    1.25
  15 -10   5   27.03    7.08
 -15 -10  -5   23.34    3.29
 -15 -10  -5   22.14    1.42
  16 -10   5    5.75    7.20
 -16 -10  -5    4.48    1.50
 -16 -10  -5    7.33    3.46
 -17 -10  -5    1.84    3.29
 -17 -10  -5    2.37    1.62
 -18 -10  -5    4.34    1.62
 -18 -10  -5    4.68    3.37
  17 -11  -5    0.77    6.41
 -17 -11   5    0.77    3.79
 -16 -11   5    1.80    1.50
  15 -11  -5   13.07    6.16
 -15 -11   5   16.97    3.71
 -14 -11   5    0.61    1.33
 -14 -11   5    2.33    3.33
  13 -11  -5    2.72    4.75
 -13 -11   5    1.35    3.04
 -13 -11   5    1.35    1.12
  12 -11  -5   17.09    5.45
 -12 -11   5   14.62    3.04
  11 -11  -5    0.11    0.75
 -11 -11   5    1.79    2.91
  11 -11  -5    0.13    4.54
  10 -11  -5   14.22    4.62
  -9 -11   5   77.35    3.58
   9 -11  -5   72.51    5.58
   9 -11  -5   75.06    2.08
  -8 -11   5    7.28    1.54
   8 -11  -5    9.30    4.08
  -8 -11   5    5.85    2.33
   7 -11  -5    3.57    1.42
   7 -11  -5    5.70    4.21
  -7 -11   5    2.83    1.42
  -7 -11   5    3.73    2.37
  -7 -11   5    1.71    2.50
  -6 -11   5   24.42    2.50
   6 -11  -5   22.23    1.46
  -5 -11   5   24.01    1.12
   5 -11  -5   24.20    3.83
   5 -11  -5   24.41    1.50
  -4 -11   5   17.33    2.87
  -4 -11   5   14.95    1.42
   4 -11  -5   15.42    1.62
  -4 -11   5   14.49    2.96
   4 -11  -5   17.63    3.62
  -3 -11   5  153.08    5.12
   3 -11  -5  146.55    4.29
   3 -11  -5  150.41    6.08
   3  11  -5  151.59    5.08
  -2 -11   5   97.14    3.75
   2 -11  -5   95.92    4.71
  -2 -11   5  100.28    4.96
   2 -11  -5   96.34    3.21
  -1 -11   5   34.32    2.37
   1 -11  -5   33.66    2.21
   0 -11   5  203.71    5.91
   0 -11   5  207.74    4.46
   1 -11   5    4.37    3.21
  -1 -11  -5    4.49    2.00
  -1 -11  -5    4.43    1.54
   1 -11   5    5.23    1.71
  -2 -11  -5    7.05    1.71
   2 -11   5    8.80    2.00
  -3 -11  -5  159.32    3.75
   5 -11   5   68.13    2.58
  -5 -11  -5   66.85    3.37
  -6 -11  -5    6.88    2.25
   6 -11   5    7.05    1.79
   6 -11   5    5.17    3.91
   7 -11   5   15.39    1.96
   7 -11   5   17.42    4.41
  -8 -11  -5   23.85    2.71
   8 -11   5   22.06    1.83
  -9 -11  -5    2.14    2.54
   9 -11   5    2.14    4.66
   9 -11   5    2.14    1.67
  10 -11   5    2.20    1.75
 -10 -11  -5    4.40    2.62
  11 -11   5    2.03    5.25
 -11 -11  -5    2.43    1.12
 -11 -11  -5    0.10    2.58
  11 -11   5    1.49    1.96
 -12 -11  -5   66.98    3.37
  12 -11   5   64.74    2.37
 -12 -11  -5   63.48    1.58
  12 -11   5   62.22    6.33
  13 -11   5   15.36    2.04
 -13 -11  -5   14.26    1.37
  13 -11   5   11.02    5.75
 -13 -11  -5   15.29    3.37
 -14 -11  -5    2.99    3.29
  14 -11   5    2.99    6.00
  15 -11   5   10.93    7.33
 -15 -11  -5    4.12    3.41
 -15 -11  -5    6.57    1.42
 -16 -11  -5    4.55    1.46
  16 -11   5    4.65    7.20
  17 -11   5    1.99    7.74
 -17 -11  -5    0.24    3.62
 -17 -11  -5    0.05    1.62
  17 -12  -5    1.21    6.70
 -17 -12   5    1.57    1.79
 -16 -12   5    1.02    1.50
 -16 -12   5    1.54    4.00
 -15 -12   5    5.33    3.75
  15 -12  -5    9.25    6.75
  14 -12  -5   15.63    5.87
 -14 -12   5   11.58    1.42
 -14 -12   5   13.56    3.50
 -13 -12   5    1.52    3.29
  13 -12  -5    1.52    5.45
  12 -12  -5    2.52    5.50
  11 -12  -5    7.98    1.04
  11 -12  -5    7.98    4.33
  10 -12  -5    6.71    4.54
 -10 -12   5    6.71    2.91
   9 -12  -5    8.73    4.75
  -9 -12   5    5.97    3.04
   9 -12  -5    7.59    1.54
  -8 -12   5    3.89    2.96
   8 -12  -5    3.49    4.79
   8 -12  -5    1.57    1.50
   7 -12  -5   25.72    1.96
   7 -12  -5   24.29    4.46
  -7 -12   5   25.03    1.67
  -6 -12   5    7.65    1.21
   6 -12  -5    7.04    1.62
  -6 -12   5    7.50    2.79
  -6 -12   5    6.13    2.54
   6 -12  -5    7.00    3.83
   5 -12  -5   98.71    6.20
  -5 -12   5   95.61    3.08
  -5 -12   5   96.01    1.92
   5 -12  -5   94.94    2.37
   4 -12  -5    0.43    3.50
  -4 -12   5    4.19    3.12
  -3 -12   5   59.29    3.08
   3  12  -5   59.26    3.46
  -2 -12   5   90.93    4.79
  -1 -12   5   14.87    3.87
  -1 -12   5   13.39    2.62
   1 -12  -5   14.07    3.25
   0 -12  -5    1.61    2.54
   0 -12  -5    1.61    1.75
   0 -12   5    2.05    3.71
  -1 -12  -5   36.31    2.00
  -1 -12  -5   38.23    2.50
   1 -12   5   38.98    3.83
  -2 -12  -5  158.28    3.16
   2 -12   5  155.37    5.33
  -2 -12  -5  155.71    3.62
   2 -12   5  154.24    3.16
   2  12   5  160.45    4.37
  -3 -12  -5    2.87    2.08
  -3 -12  -5    3.35    1.46
   4 -12   5    1.75    4.08
  -4 -12  -5    1.31    1.96
   4 -12   5    2.09    1.87
  -4 -12  -5    2.39    1.08
  -5 -12  -5   11.61    2.37
   5 -12   5   10.74    1.96
   5 -12   5   12.15    4.66
  -6 -12  -5    2.53    2.54
   7 -12   5   11.10    1.92
  -7 -12  -5   13.46    2.46
   7 -12   5    8.55    4.50
  -8 -12  -5   41.89    3.33
   8 -12   5   40.86    2.54
   8 -12   5   40.18    6.00
   9 -12   5    6.27    4.87
   9 -12   5    6.56    1.96
  10 -12   5    5.37    5.62
  10 -12   5    2.69    1.96
  11 -12   5   12.59    6.12
  11 -12   5   15.29    2.12
 -11 -12  -5   17.31    3.37
  12 -12   5   30.33    5.75
  12 -12   5   32.50    2.25
 -12 -12  -5   34.00    3.41
  13 -12   5    0.90    6.25
 -13 -12  -5    0.63    1.29
  14 -12   5   10.93    7.00
 -14 -12  -5   12.34    1.54
  15 -12   5    2.86    7.04
 -16 -12  -5    5.53    1.50
 -16 -12  -5    7.72    3.87
  16 -12   5    5.19    8.04
 -17 -12  -5    3.24    4.12
 -17 -12  -5    3.49    1.71
 -16 -13   5    0.29    1.62
 -16 -13   5    0.29    4.16
  16 -13  -5    4.02    6.91
 -15 -13   5    6.20    1.58
  15 -13  -5   12.40    6.79
 -15 -13   5    8.35    4.00
 -14 -13   5    8.57    3.83
  14 -13  -5    7.07    6.54
 -13 -13   5   10.62    3.46
  13 -13  -5   11.57    5.70
 -12 -13   5    3.74    3.50
  12 -13  -5    5.02    5.75
  11 -13  -5   11.51    1.46
  11 -13  -5   13.20    5.79
 -11 -13   5    7.55    3.54
 -10 -13   5    9.19    3.25
  10 -13  -5    6.49    5.20
   9 -13  -5    1.63    5.04
   9 -13  -5    1.61    1.62
   8 -13  -5    4.67    4.46
  -8 -13   5    2.26    2.91
   8 -13  -5    1.42    1.62
  -7 -13   5    2.06    2.58
  -7 -13   5    0.52    2.79
  -6 -13   5    7.02    1.33
   6 -13  -5    9.42    4.79
  -6 -13   5    9.47    3.25
   6 -13  -5    6.96    1.92
   5 -13  -5   53.93    2.33
  -5 -13   5   56.50    3.37
  -5 -13   5   56.00    2.00
  -4 -13   5  102.79    2.33
  -4 -13   5  106.56    4.58
   4 -13  -5  106.71    2.79
  -4 -13   5  102.34    3.37
   4 -13  -5  107.23    5.33
   3 -13  -5   13.09    3.83
  -3 -13   5   12.14    2.62
   2 -13  -5   17.19    2.00
  -2 -13   5   15.98    2.54
  -1 -13   5    9.31    4.00
  -1 -13   5    7.33    2.42
   1 -13  -5    7.25    1.96
   1 -13  -5    8.68    3.29
   0 -13   5    1.76    4.04
   0 -13   5    4.80    2.17
   0 -13  -5    4.27    2.91
   1 -13   5   62.31    5.00
  -1 -13  -5   59.60    3.41
  -2 -13  -5   27.20    2.91
   2 -13   5   28.01    3.12
   2 -13   5   25.98    4.33
  -2 -13  -5   25.81    2.87
   2  13   5   29.96    4.25
  -3 -13  -5   23.05    1.83
  -3 -13  -5   22.38    2.33
   3 -13   5   23.24    2.33
   3  13   5   25.93    3.41
   4 -13   5    5.83    5.04
  -4 -13  -5    6.76    2.17
  -4 -13  -5    6.86    1.17
   4 -13   5    6.27    2.08
  -5 -13  -5  178.92    3.71
   5 -13   5  182.90    6.37
   5 -13   5  180.96    3.62
   6 -13   5    0.60    4.79
   6 -13   5    0.60    1.96
   7 -13   5    1.95    1.92
  -7 -13  -5    0.52    2.66
   8 -13   5   62.15    2.62
   8 -13   5   61.23    5.83
  -8 -13  -5   61.48    3.46
   9 -13   5   70.63    2.37
   9 -13   5   68.23    5.62
  -9 -13  -5   67.13    3.00
  10 -13   5    2.12    2.21
 -10 -13  -5    1.18    3.16
  11 -13   5    4.27    2.33
 -11 -13  -5    3.34    3.21
  11 -13   5    2.04    6.08
 -12 -13  -5    6.90    1.33
  13 -13   5    0.66    2.33
 -13 -13  -5    0.12    1.37
  14 -13   5   24.16    7.41
 -14 -13  -5   26.10    4.04
 -15 -13  -5    4.67    3.79
  15 -13   5    8.38    7.25
 -16 -13  -5    3.03    1.71
  16 -13   5    4.29    7.95
 -15 -14   5    2.31    4.29
  15 -14  -5    6.60    7.25
 -14 -14   5    0.50    1.58
 -14 -14   5    2.21    3.87
  14 -14  -5    0.50    6.66
 -13 -14   5    0.37    3.83
  13 -14  -5    3.01    6.58
 -12 -14   5    4.62    3.71
  12 -14  -5    4.62    5.20
 -11 -14   5   13.21    3.66
  11 -14  -5   13.31    1.67
  10 -14  -5    4.94    5.29
 -10 -14   5    4.94    3.29
   9 -14  -5    7.30    5.45
   9 -14  -5    4.60    1.83
  -9 -14   5    4.62    3.12
  -7 -14   5   47.79    1.54
   7 -14  -5   48.87    2.21
   7 -14  -5   50.09    5.16
   6 -14  -5    2.70    1.83
  -6 -14   5    4.28    3.37
   6 -14  -5    5.65    4.96
   5 -14  -5    2.78    2.00
  -5 -14   5    2.78    2.83
  -5 -14   5    2.78    3.79
   5 -14  -5    2.78    4.58
   4 -14  -5   93.21    2.42
  -4 -14   5   92.93    3.41
   4 -14  -5   89.77    4.87
  -4 -14   5   88.97    2.25
  -3 -14   5   71.94    5.00
   3 -14  -5   69.36    3.21
   2 -14  -5    8.74    3.79
  -2 -14   5    8.15    4.33
  -2 -14   5    8.17    2.50
   2 -14  -5    9.75    2.50
  -1 -14   5   33.09    3.41
  -1 -14   5   36.40    5.12
   1 -14  -5   32.15    2.87
   0 -14   5   78.41    6.29
   0 -14   5   73.82    3.96
   0 -14  -5   71.73    3.50
   0 -14  -5   75.32    4.87
   1 -14   5   74.38    3.66
   1 -14   5   72.89    5.58
  -1 -14  -5   77.14    4.33
  -1 -14  -5   73.05    3.66
  -2 -14  -5    2.04    2.29
   2 -14   5    2.15    4.79
  -2 -14  -5    3.89    2.42
   2 -14   5    2.04    2.21
  -3 -14  -5    4.78    1.96
   4 -14   5   54.73    2.46
  -4 -14  -5   54.97    1.58
  -5 -14  -5   47.60    2.62
   5 -14   5   46.84    2.66
[truncated: 1,730,139 more chars]
